# Supplementary material for: Divergent synthesis of 2-methylthioindole and 2-unsubstituted indole derivatives mediated by SOCl2 and dimethyl/diethyl sulfoxides
Source: Royal Society of Chemistry journal article supplement (doi:10.1039/d2ob01580c), 2022-01-01

# Divergent Synthesis of 2-Methylthioindole and 2-Unsubstituted Indole Derivatives Mediated by SOCl<sub>2</sub> and Dimethyl/diethyl Sulfoxides

Jingran Zhang,<sup>a</sup> Beibei Zhang,<sup>a</sup> Jiaxin He,<sup>a</sup> Haofeng Shi<sup>a</sup> and Yunfei Du<sup>a\*</sup>

*<sup>a</sup>Tianjin Key Laboratory for Modern Drug Delivery & High-Efficiency, School of  
Pharmaceutical Science and Technology, Tianjin University, Tianjin 300072, China.*

Tel: +86-22-27406121; [duyunfeier@tju.edu.cn](mailto:duyunfeier@tju.edu.cn)

## Supporting Information

### Contents

|            |                                                |          |
|------------|------------------------------------------------|----------|
| <b>I</b>   | General Information                            | S2       |
| <b>II</b>  | Experimental Procedures and Spectroscopic Data | S3-S30   |
| <b>III</b> | References                                     | S31      |
| <b>IV</b>  | <sup>1</sup> H and <sup>13</sup> C NMR Spectra | S32-S151 |

## I. General Information

$^1\text{H}$  and  $^{13}\text{C}$  NMR spectra were recorded on a 400 MHz or 600 MHz spectrometer at 25 °C. Chemical shifts values are given in ppm and referred as the internal standard to TMS: 0.00 ppm. Chemical shifts were expressed in parts per million ( $\delta$ ) downfield from the internal standard tetramethylsilane, and were reported as s (singlet), d (doublet), t (triplet), q (quadruple), dd (doublet of doublet), m (multiplet), etc. The coupling constants  $J$ , are reported in Hertz (Hz). High resolution mass spectrometry (HRMS) was obtained on a Q-TOF micro spectrometer. Melting points were determined with a Micromelting point apparatus. TLC plates were visualized by exposure to ultraviolet light.

Reagents and solvents were purchased as reagent grade and were used without further purification. All reactions were performed in standard glassware, heated at 70 °C for 3 h before used. Flash column chromatography was performed over silica gel (200-300 m) using a mixture of ethyl acetate (EtOAc) and petroleum ether (PE).

## II. Experimental Procedures and Spectroscopic Data

### 1. Typical procedure for the synthesis of 1-phenylvinylaniline derivatives 1 (1a-q):<sup>1</sup>

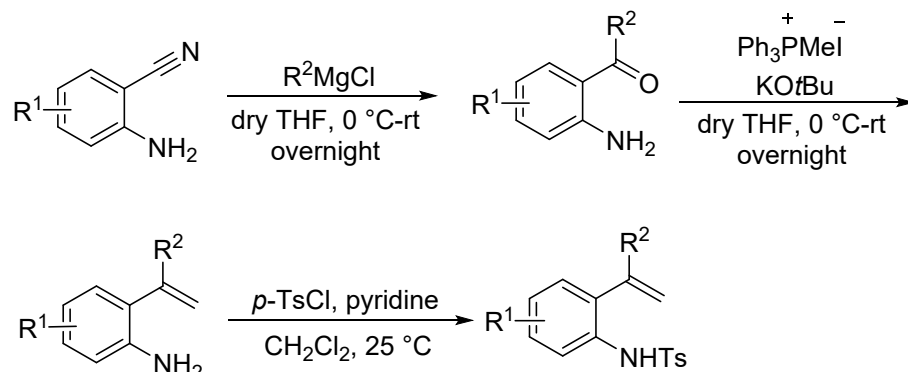

**General procedure:** 2-Aminobenzonitrile (1.0 equiv, 10 mmol) was added to a solution of Grignard reagent (3.0 equiv, 30 mmol) in THF (30 mL) at 0 °C. The reaction mixture was allowed to warm to room temperature and was stirred overnight. Saturated aq. NH<sub>4</sub>Cl (30 mL) was then cautiously added dropwise by syringe until gas evolution ceased. The reaction mixture was then extracted with CH<sub>2</sub>Cl<sub>2</sub> (3 x 30 mL). The organic solvent was removed by rotary evaporator under vacuum and the residue was purified by flash column chromatography on silica gel to afford ketone intermediate.

To a stirred solution of Ph<sub>3</sub>PMeI (1.5 equiv, 7.5 mmol) in dry THF (10 mL) was added KO<sup>+</sup>tBu<sup>-</sup> (1.5 equiv, 7.5 mmol) in portions under nitrogen. After the mixture was stirred at room temperature for 0.5 h, a solution of the corresponding ketone (1 equiv, 5 mmol) in THF (10 mL) was added dropwise. The reaction mixture was then stirred at room temperature under nitrogen overnight. Then the reaction mixture was quenched with water and extracted with EtOAc (25 mL x 2). The combined organic layers were washed with saturated aq. NaHCO<sub>3</sub> (25 mL) and brine (25 mL), dried over anhydrous Na<sub>2</sub>SO<sub>4</sub>, and concentrated on rotary evaporator under vacuum. The residue was purified by column chromatography on silica gel to give 2-alkenylaniline.

To a solution of 2-alkenylaniline (1.0 equiv, 10.0 mmol) in pyridine (20 mL) was added *p*-toluenesulfonyl chloride (1.1 equiv, 11.0 mmol) at 0 °C. After being stirred at room temperature for 2 h, the reaction mixture was poured into water and then the product was extracted with CH<sub>2</sub>Cl<sub>2</sub> (3 x 30 mL), dried over Na<sub>2</sub>SO<sub>4</sub>, and concentrated *in vacuo*. The residue was purified by column chromatography on silica gel (EtOAc/PE = 1/5) to give the corresponding 1-phenylvinylaniline product.

## b. Spectroscopic data of 1-phenylvinylaniline derivatives 1 (1a-q):

### 4-Methyl-*N*-(2-(1-phenylvinyl)phenyl)benzenesulfonamide (1a)

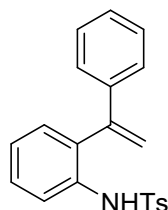

Following the general procedure, **1a** was purified by silica gel chromatography (10% EtOAc/PE). A white solid (yield: 80%); mp: 88-90 °C. <sup>1</sup>H NMR (600 MHz, CDCl<sub>3</sub>) δ 7.70 (d, *J* = 8.2 Hz, 1H), 7.43 (d, *J* = 8.3 Hz, 2H), 7.34 – 7.26 (m, 2H), 7.22 (t, *J* = 7.6 Hz, 2H), 7.10 (dd, *J* = 10.3, 4.2 Hz, 3H), 7.06 (dd, *J* = 7.5, 1.6 Hz, 1H), 7.04 – 6.99 (m, 2H), 6.53 (s, 1H), 5.69 (s, 1H), 4.89 (s, 1H), 2.36 (s, 3H). <sup>13</sup>C NMR (151 MHz, CDCl<sub>3</sub>) δ 145.0, 143.7, 138.7, 136.1, 134.3, 133.1, 130.5, 129.5, 128.9, 128.8, 128.6, 127.3, 126.4, 124.7, 121.1, 117.1, 21.5. HRMS (ESI) calcd for C<sub>21</sub>H<sub>19</sub>NNaO<sub>2</sub>S<sup>+</sup> [M + Na<sup>+</sup>] 372.1029, found 372.1022.

### *N*-(4-Chloro-2-(1-phenylvinyl)phenyl)-4-methylbenzenesulfonamide (1b)

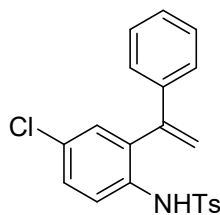

Following the general procedure, **1b** was purified by silica gel chromatography (10% EtOAc/PE). A white solid (yield: 82%); mp: 94-95 °C. <sup>1</sup>H NMR (400 MHz, CDCl<sub>3</sub>) δ 7.66 (d, *J* = 8.8 Hz, 1H), 7.45 – 7.41 (m, 2H), 7.35 – 7.27 (m, 2H), 7.25 – 7.22 (m, 1H), 7.14 (d, *J* = 8.0 Hz, 2H), 7.07 (d, *J* = 2.5 Hz, 1H), 7.01 (dt, *J* = 8.5, 1.8 Hz, 2H), 6.45 (s, 1H), 5.69 (d, *J* = 0.6 Hz, 1H), 4.88 (d, *J* = 0.6 Hz, 1H), 2.39 (s, 3H). <sup>13</sup>C NMR (101 MHz, CDCl<sub>3</sub>) δ 143.99, 143.96, 137.9, 135.8, 134.8, 133.0, 130.24, 130.22, 129.6, 129.0, 128.89, 128.85, 127.2, 126.3, 122.7, 117.8, 21.8. HRMS (ESI) calcd for C<sub>21</sub>H<sub>18</sub><sup>35</sup>ClNNaO<sub>2</sub>S<sup>+</sup> [M + Na<sup>+</sup>] 406.0639, found 406.0635.

### *N*-(4-Bromo-2-(1-phenylvinyl)phenyl)-4-methylbenzenesulfonamide (1c)

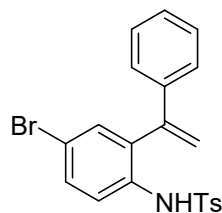

Following the general procedure, **1c** was purified by silica gel chromatography (10% EtOAc/PE). A white solid (yield: 78%); mp: 101-103 °C. <sup>1</sup>H NMR (400 MHz, CDCl<sub>3</sub>) δ 7.60 (d, *J* = 8.7 Hz, 1H), 7.47 – 7.39 (m, 3H), 7.35 – 7.28 (m, 1H), 7.23 (dd, *J* = 8.7, 1.8 Hz, 3H), 7.14 (d, *J* = 8.0 Hz, 2H), 7.04 – 6.95 (m, 2H), 6.45 (s, 1H), 5.70 (d, *J* = 0.4 Hz, 1H), 4.89 (d, *J* = 0.5 Hz, 1H), 2.39 (s, 3H). <sup>13</sup>C NMR (101 MHz, CDCl<sub>3</sub>) δ 144.0, 143.8, 137.9, 135.7, 135.0, 133.5, 133.1, 131.8, 129.6, 129.0, 128.9, 127.2, 126.3, 122.8, 117.9, 117.9, 21.6. HRMS (ESI) calcd for C<sub>21</sub>H<sub>18</sub><sup>79</sup>BrNNaO<sub>2</sub>S<sup>+</sup> [*M* + Na<sup>+</sup>] 450.0134, found 450.0136.

#### 4-Methyl-*N*-(5-methyl-2-(1-phenylvinyl)phenyl)benzenesulfonamide (**1d**)

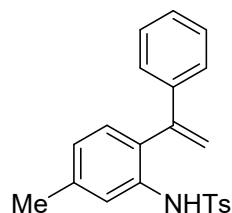

Following the general procedure, **1d** was purified by silica gel chromatography (10% EtOAc/PE). A white solid (yield: 83%); mp: 140-142 °C. <sup>1</sup>H NMR (400 MHz, CDCl<sub>3</sub>) δ 7.53 (s, 1H), 7.44 (d, *J* = 7.8 Hz, 2H), 7.32 – 7.26 (m, 1H), 7.21 (t, *J* = 7.5 Hz, 2H), 7.12 (d, *J* = 8.4 Hz, 2H), 7.01 (d, *J* = 8.1 Hz, 2H), 6.98 – 6.89 (m, 2H), 6.49 (s, 1H), 5.65 (s, 1H), 4.85 (s, 1H), 2.38 (s, 6H). <sup>13</sup>C NMR (101 MHz, CDCl<sub>3</sub>) δ 145.0, 143.7, 139.0, 138.9, 136.1, 134.0, 130.3, 130.3, 129.5, 128.8, 128.5, 127.3, 126.4, 125.6, 121.9, 116.9, 21.6, 21.5. HRMS (ESI) calcd for C<sub>22</sub>H<sub>21</sub>NNaO<sub>2</sub>S<sup>+</sup> [*M* + Na<sup>+</sup>] 386.1185, found 386.1188.

#### 4-Methyl-*N*-(2-(1-phenylvinyl)-5-(trifluoromethyl)phenyl)benzenesulfonamide (**1e**)

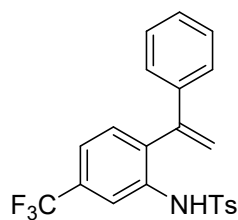

Following the general procedure, **1e** was purified by silica gel chromatography (10% EtOAc/PE). A white solid (yield: 75%); mp: 108-110 °C. <sup>1</sup>H NMR (400 MHz, CDCl<sub>3</sub>) δ 8.00 (d, *J* = 5.2 Hz, 1H), 7.45 (d, *J* = 8.3 Hz, 2H), 7.33 (ddd, *J* = 7.8, 6.5, 4.6 Hz, 2H), 7.29 – 7.18 (m, 3H), 7.14 (d, *J* = 8.1 Hz, 2H), 7.04 – 6.95 (m, 2H), 6.68 (s, 1H), 5.80 (s, 1H), 4.98 (s, 1H), 2.38 (s, 3H). <sup>19</sup>F NMR (376 MHz, CDCl<sub>3</sub>) δ -62.74 (s). <sup>13</sup>C NMR (101 MHz, CDCl<sub>3</sub>) δ 144.1 (q, <sup>2</sup>*J*<sub>C-F</sub> = 33.3 Hz), 137.7, 136.0, 135.5, 135.0,

131.4 (q,  $^2J_{C-F} = 32.5$  Hz), 131.00, 130.97, 129.7, 129.0, 128.9, 127.3, 126.3, 123.7 (q,  $^1J_{C-F} = 270.8$  Hz), 121.1 (q,  $^4J_{C-F} = 3.6$  Hz), 118.0, 117.3 (q,  $^4J_{C-F} = 4.0$  Hz), 21.6. HRMS (ESI) calcd for  $C_{22}H_{18}F_3NNaO_2S^+$  [ $M + Na^+$ ] 440.0903, found 440.0908.

***N*-(2-(1-(3-Methoxyphenyl)vinyl)phenyl)-4-methylbenzenesulfonamide (1f)**

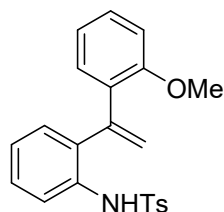

Following the general procedure, **1f** was purified by silica gel chromatography (10% EtOAc/PE). A white solid (yield: 68%); mp: 87-89 °C.  $^1H$  NMR (600 MHz,  $CDCl_3$ )  $\delta$  7.61 (d,  $J = 8.2$  Hz, 1H), 7.45 (d,  $J = 8.2$  Hz, 2H), 7.29 (dd,  $J = 24.0, 15.6$  Hz, 2H), 7.20 (t,  $J = 7.3$  Hz, 1H), 7.12 (d,  $J = 8.0$  Hz, 2H), 7.08 (d,  $J = 6.6$  Hz, 1H), 7.00 (t,  $J = 7.5$  Hz, 1H), 6.97 (dd,  $J = 7.4, 1.2$  Hz, 1H), 6.91 (d,  $J = 8.2$  Hz, 1H), 6.87 (t,  $J = 7.4$  Hz, 1H), 5.45 (d,  $J = 1.3$  Hz, 1H), 4.87 (d,  $J = 1.3$  Hz, 1H), 3.77 (s, 3H), 2.35 (s, 3H).  $^{13}C$  NMR (151 MHz,  $CDCl_3$ )  $\delta$  156.1, 143.5, 142.4, 136.4, 134.3, 134.1, 129.9, 129.9, 129.4, 129.4, 129.3, 128.2, 127.3, 123.9, 121.6, 120.8, 119.7, 111.3, 55.6, 21.5. HRMS (ESI) calcd for  $C_{22}H_{21}NNaO_3S^+$  [ $M + Na^+$ ] 402.1134, found 402.1138.

***N*-(2-(1-(3-Fluorophenyl)vinyl)phenyl)-4-methylbenzenesulfonamide (1g)**

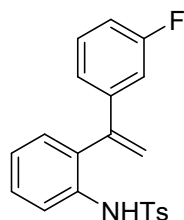

Following the general procedure, **1g** was purified by silica gel chromatography (10% EtOAc/PE). A white solid (yield: 65%); mp: 64-66 °C.  $^1H$  NMR (600 MHz,  $CDCl_3$ )  $\delta$  7.75 (d,  $J = 8.3$  Hz, 1H), 7.43 (d,  $J = 8.1$  Hz, 2H), 7.37 – 7.31 (m, 1H), 7.20 (dd,  $J = 14.1, 7.9$  Hz, 1H), 7.15 – 7.07 (m, 3H), 7.03 (dd,  $J = 7.6, 1.4$  Hz, 1H), 6.96 (td,  $J = 8.3, 2.3$  Hz, 1H), 6.89 (d,  $J = 7.8$  Hz, 1H), 6.57 (s, 1H), 6.52 (d,  $J = 10.2$  Hz, 1H), 5.77 (s, 1H), 4.99 (s, 1H), 2.36 (s, 3H).  $^{19}F$  NMR (376 MHz,  $CDCl_3$ )  $\delta$  -112.04 (s).  $^{13}C$  NMR (151 MHz,  $CDCl_3$ )  $\delta$  162.9 (d,  $^1J_{C-F} = 245.1$  Hz), 144.0, 143.9, 141.0 (d,  $^3J_{C-F} = 7.2$  Hz), 136.0, 134.2, 132.3, 130.4, 130.2 (d,  $^3J_{C-F} = 8.3$  Hz), 129.5, 129.1, 127.1, 124.8, 121.9, 121.1, 118.2, 115.3 (d,  $^2J_{C-F} = 21.1$  Hz), 113.4 (d,  $^2J_{C-F} = 22.3$  Hz), 21.5. HRMS (ESI) calcd for  $C_{21}H_{18}FNNaO_2S^+$  [ $M + Na^+$ ] 390.0934, found 390.0938.

***N*-(2-(1-(4-Bromophenyl)vinyl)phenyl)-4-methylbenzenesulfonamide (1h)**

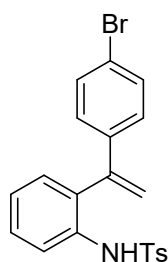

Following the general procedure, **1h** was purified by silica gel chromatography (10% EtOAc/PE). A white solid (yield: 73%); mp: 104-106 °C. <sup>1</sup>H NMR (400 MHz, CDCl<sub>3</sub>) δ 7.76 (d, *J* = 8.2 Hz, 1H), 7.41 (d, *J* = 8.2 Hz, 2H), 7.34 (t, *J* = 7.8 Hz, 1H), 7.28 (s, 2H), 7.11 (t, *J* = 7.9 Hz, 3H), 7.03 (d, *J* = 6.8 Hz, 1H), 6.83 (d, *J* = 8.4 Hz, 2H), 6.52 (s, 1H), 5.76 (s, 1H), 5.00 (s, 1H), 2.39 (s, 3H). <sup>13</sup>C NMR (101 MHz, CDCl<sub>3</sub>) δ 143.9, 143.9, 137.5, 136.0, 134.2, 132.3, 131.8, 130.4, 129.5, 129.1, 127.8, 127.1, 124.7, 122.7, 120.9, 117.7, 21.6. HRMS (ESI) calcd for C<sub>21</sub>H<sub>18</sub><sup>79</sup>BrNNaO<sub>2</sub>S<sup>+</sup> [M + Na<sup>+</sup>] 450.0134, found 450.0138.

#### ***N*-(2-(1-([1,1'-Biphenyl]-4-yl)vinyl)phenyl)-4-methylbenzenesulfonamide (1i)**

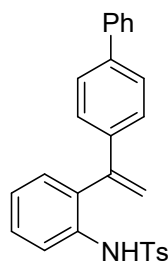

Following the general procedure, **1i** was purified by silica gel chromatography (10% EtOAc/PE). A white solid (yield: 62%); mp: 102-104 °C. <sup>1</sup>H NMR (400 MHz, CDCl<sub>3</sub>) δ 7.77 (t, *J* = 8.4 Hz, 1H), 7.60 (d, *J* = 7.4 Hz, 2H), 7.53 – 7.31 (m, 8H), 7.19 – 6.97 (m, 6H), 6.61 (s, 1H), 5.77 (d, *J* = 3.7 Hz, 1H), 4.93 (d, *J* = 3.4 Hz, 1H), 2.31 (s, 3H). <sup>13</sup>C NMR (101 MHz, CDCl<sub>3</sub>) δ 144.5, 143.8, 141.3, 140.2, 137.5, 136.1, 134.3, 133.0, 130.5, 129.5, 128.9, 127.7, 127.4, 127.2, 127.0, 126.8, 124.8, 121.1, 117.1, 21.5. HRMS (ESI) calcd for C<sub>27</sub>H<sub>23</sub>NNaO<sub>2</sub>S<sup>+</sup> [M + Na<sup>+</sup>] 448.1342, found 448.1346.

#### **4-Methyl-*N*-(2-(prop-1-en-2-yl)phenyl)benzenesulfonamide (1j)**

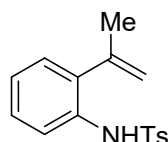

Following the general procedure, **1j** was purified by silica gel chromatography (10% EtOAc/PE). A white solid (yield: 88%); mp: 74-76 °C. <sup>1</sup>H NMR (600 MHz, CDCl<sub>3</sub>) δ 7.64 (d, *J* = 8.3 Hz, 1H), 7.62 (d, *J* = 8.3 Hz, 2H), 7.21 (dd, *J* = 9.5, 4.9 Hz, 3H), 7.04

(dd,  $J = 8.8, 6.0$  Hz, 2H), 7.01 (dd,  $J = 7.6, 1.6$  Hz, 1H), 5.26 (s, 1H), 4.68 (s, 1H), 2.36 (s, 3H), 1.70 (s, 3H).  $^{13}\text{C}$  NMR (151 MHz,  $\text{CDCl}_3$ )  $\delta$  143.9, 142.1, 136.4, 134.8, 132.9, 129.6, 128.0, 128.0, 127.2, 124.4, 120.6, 117.1, 24.4, 21.5. HRMS (ESI) calcd for  $\text{C}_{16}\text{H}_{17}\text{NNaO}_2\text{S}^+$  [ $\text{M} + \text{Na}^+$ ] 310.0872, found 310.0876.

### ***N*-(2-(Hept-1-en-2-yl)phenyl)-4-methylbenzenesulfonamide (1k)**

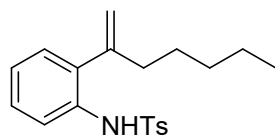

Following the general procedure, **1k** was purified by silica gel chromatography (10% EtOAc/PE). A white solid (yield: 65%); mp: 61-63 °C.  $^1\text{H}$  NMR (600 MHz,  $\text{CDCl}_3$ )  $\delta$  7.67 (d,  $J = 8.2$  Hz, 1H), 7.63 (d,  $J = 8.2$  Hz, 2H), 7.21 (t,  $J = 8.9$  Hz, 3H), 7.03 (t,  $J = 7.5$  Hz, 1H), 7.00 – 6.94 (m, 2H), 5.23 (s, 1H), 4.69 (s, 1H), 2.36 (s, 3H), 1.97 – 1.87 (m, 2H), 1.26 – 1.18 (m, 4H), 1.18 – 1.13 (m, 2H), 0.86 (t,  $J = 7.2$  Hz, 3H).  $^{13}\text{C}$  NMR (151 MHz,  $\text{CDCl}_3$ )  $\delta$  146.6, 143.8, 133.9, 133.4, 129.6, 128.3, 128.0, 127.2, 124.0, 119.8, 115.9, 37.8, 31.5, 27.1, 22.4, 21.5, 14.0. HRMS (ESI) calcd for  $\text{C}_{20}\text{H}_{25}\text{NNaO}_2\text{S}^+$  [ $\text{M} + \text{Na}^+$ ] 366.1498, found 366.1494.

### **3-Methyl-*N*-(2-(1-phenylvinyl)phenyl)benzenesulfonamide (1l)**

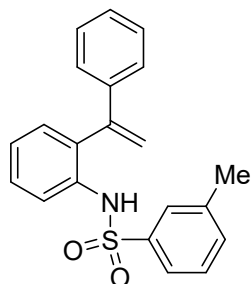

Following the general procedure, **1l** was purified by silica gel chromatography (10% EtOAc/PE). A white solid (yield: 83%); mp: 80-82 °C.  $^1\text{H}$  NMR (600 MHz,  $\text{CDCl}_3$ )  $\delta$  7.71 (d,  $J = 8.2$  Hz, 1H), 7.38 (d,  $J = 8.7$  Hz, 2H), 7.35 – 7.31 (m, 1H), 7.29 (t,  $J = 7.5$  Hz, 2H), 7.25 – 7.19 (m, 3H), 7.12 (t,  $J = 7.4$  Hz, 1H), 7.08 (dd,  $J = 7.4, 1.2$  Hz, 1H), 7.02 (d,  $J = 7.5$  Hz, 2H), 6.52 (s, 1H), 5.69 (s, 1H), 4.88 (s, 1H), 2.29 (s, 3H).  $^{13}\text{C}$  NMR (151 MHz,  $\text{CDCl}_3$ )  $\delta$  145.1, 139.1, 138.9, 138.7, 134.2, 133.7, 133.3, 130.5, 128.9, 128.8, 128.7, 128.6, 127.5, 126.3, 124.9, 124.4, 121.3, 117.0, 21.2. HRMS (ESI) calcd for  $\text{C}_{21}\text{H}_{19}\text{NNaO}_2\text{S}^+$  [ $\text{M} + \text{Na}^+$ ] 372.1029, found 372.1026.

### **4-Chloro-*N*-(2-(1-phenylvinyl)phenyl)benzenesulfonamide (1m)**



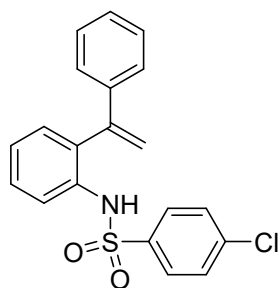

Following the general procedure, **1m** was purified by silica gel chromatography (10% EtOAc/PE). A white solid (yield: 85%); mp: 97-99 °C. <sup>1</sup>H NMR (400 MHz, CDCl<sub>3</sub>) δ 7.72 (dd, *J* = 8.2, 0.8 Hz, 1H), 7.47 – 7.40 (m, 2H), 7.38 – 7.28 (m, 2H), 7.25 – 7.20 (m, 3H), 7.15 (td, *J* = 7.4, 1.1 Hz, 1H), 7.10 (dd, *J* = 7.6, 1.7 Hz, 1H), 6.99 (dt, *J* = 8.5, 1.8 Hz, 2H), 6.53 (s, 1H), 5.71 (d, *J* = 0.9 Hz, 1H), 4.93 (d, *J* = 0.8 Hz, 1H). <sup>13</sup>C NMR (101 MHz, CDCl<sub>3</sub>) δ 145.0, 139.5, 138.5, 137.4, 133.7, 133.5, 130.7, 129.2, 129.0, 128.9, 128.7, 128.6, 126.2, 125.3, 121.7, 117.2. HRMS (ESI) calcd for C<sub>20</sub>H<sub>16</sub><sup>35</sup>ClNNaO<sub>2</sub>S<sup>+</sup> [M + Na<sup>+</sup>] 392.0482, found 392.0488.

#### 4-Bromo-*N*-(2-(1-phenylvinyl)phenyl)benzenesulfonamide (**1n**)

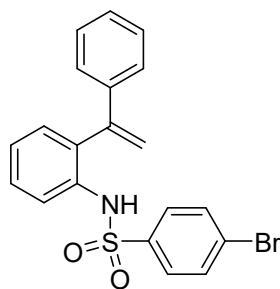

Following the general procedure, **1n** was purified by silica gel chromatography (10% EtOAc/PE). A white solid (yield: 80%); mp: 82-84 °C. <sup>1</sup>H NMR (400 MHz, CDCl<sub>3</sub>) δ 7.73 (dd, *J* = 8.2, 0.9 Hz, 1H), 7.46 – 7.40 (m, 2H), 7.39 – 7.28 (m, 4H), 7.25 – 7.21 (m, 2H), 7.16 (td, *J* = 7.4, 1.1 Hz, 1H), 7.11 (dd, *J* = 7.6, 1.7 Hz, 1H), 7.03 – 6.94 (m, 2H), 6.54 (s, 1H), 5.71 (d, *J* = 0.9 Hz, 1H), 4.94 (d, *J* = 0.8 Hz, 1H). <sup>13</sup>C NMR (101 MHz, CDCl<sub>3</sub>) δ 144.9, 138.4, 137.9, 133.7, 133.5, 132.1, 130.7, 129.0, 128.9, 128.7, 128.6, 128.0, 126.2, 125.3, 121.7, 117.3. HRMS (ESI) calcd for C<sub>20</sub>H<sub>16</sub><sup>79</sup>BrNNaO<sub>2</sub>S<sup>+</sup> [M + Na<sup>+</sup>] 435.9977, found 435.9973.

#### 4-Methoxy-*N*-(2-(1-phenylvinyl)phenyl)benzenesulfonamide (**1o**)

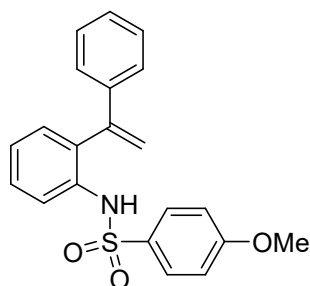

Following the general procedure, **1o** was purified by silica gel chromatography (10% EtOAc/PE). A white solid (yield: 82%); mp: 87-88 °C. <sup>1</sup>H NMR (400 MHz, CDCl<sub>3</sub>) δ 7.71 (dd, *J* = 8.2, 0.8 Hz, 1H), 7.54 – 7.43 (m, 2H), 7.35 – 7.27 (m, 2H), 7.25 – 7.20 (m, 2H), 7.11 (td, *J* = 7.4, 1.1 Hz, 1H), 7.07 (dd, *J* = 7.6, 1.8 Hz, 1H), 7.05 – 7.00 (m, 2H), 6.80 – 6.73 (m, 2H), 6.53 (s, 1H), 5.72 (d, *J* = 0.9 Hz, 1H), 4.93 (d, *J* = 0.9 Hz, 1H), 3.82 (s, 3H). <sup>13</sup>C NMR (101 MHz, CDCl<sub>3</sub>) δ 163.1, 145.0, 138.7, 134.3, 133.1, 130.6, 130.5, 129.4, 128.9, 128.8, 128.6, 126.4, 124.7, 121.1, 117.1, 114.0, 55.6. HRMS (ESI) calcd for C<sub>21</sub>H<sub>19</sub>NNaO<sub>3</sub>S<sup>+</sup> [M + Na<sup>+</sup>] 388.0978, found 388.0971.

#### 4-Nitro-*N*-(2-(1-phenylvinyl)phenyl)benzenesulfonamide (**1p**)

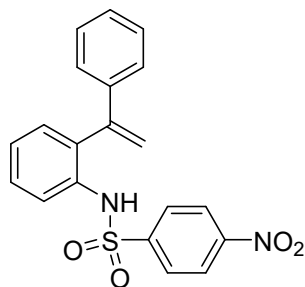

Following the general procedure, **1p** was purified by silica gel chromatography (10% EtOAc/PE). A yellow solid (yield: 79%); mp: 117-119 °C. <sup>1</sup>H NMR (400 MHz, CDCl<sub>3</sub>) δ 8.10 – 8.04 (m, 2H), 7.74 (dd, *J* = 8.2, 0.9 Hz, 1H), 7.68 – 7.60 (m, 2H), 7.39 (td, *J* = 7.9, 1.7 Hz, 1H), 7.33 – 7.26 (m, 1H), 7.24 – 7.10 (m, 4H), 6.98 (dt, *J* = 8.5, 1.8 Hz, 2H), 6.60 (s, 1H), 5.70 (d, *J* = 0.8 Hz, 1H), 4.93 (d, *J* = 0.7 Hz, 1H). <sup>13</sup>C NMR (101 MHz, CDCl<sub>3</sub>) δ 150.1, 144.8, 144.5, 138.2, 133.7, 133.0, 130.8, 129.2, 128.9, 128.9, 128.3, 126.0, 125.9, 124.0, 122.2, 117.4. HRMS (ESI) calcd for C<sub>20</sub>H<sub>16</sub>N<sub>2</sub>NaO<sub>4</sub>S<sup>+</sup> [M + Na<sup>+</sup>] 403.0723, found 403.0726.

#### *N*-(2-(1-Phenylvinyl)phenyl)benzenesulfonamide (**1q**)

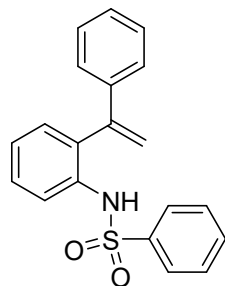

Following the general procedure, **1q** was purified by silica gel chromatography (10% EtOAc/PE). A white solid (yield: 81%); mp: 120-121 °C. <sup>1</sup>H NMR (600 MHz, CDCl<sub>3</sub>) δ 7.72 (d, *J* = 8.2 Hz, 1H), 7.56 (dd, *J* = 8.4, 1.0 Hz, 2H), 7.53 – 7.47 (m, 1H), 7.38 – 7.31 (m, 3H), 7.32 – 7.27 (m, 1H), 7.26 – 7.21 (m, 2H), 7.13 (td, *J* = 7.5, 1.1 Hz, 1H), 7.08 (dd, *J* = 7.5, 1.4 Hz, 1H), 7.02 (dd, *J* = 8.2, 0.9 Hz, 2H), 6.49 (s, 1H), 5.66 (s,

1H), 4.85 (s, 1H). <sup>13</sup>C NMR (151 MHz, CDCl<sub>3</sub>) δ 145.0, 139.1, 138.6, 134.1, 133.4, 132.9, 132.9, 130.5, 128.9, 128.9, 128.7, 127.2, 126.3, 125.0, 121.4, 117.2. HRMS (ESI) calcd for C<sub>20</sub>H<sub>17</sub>NNaO<sub>2</sub>S<sup>+</sup> [M + Na<sup>+</sup>] 358.0872, found 358.0876.

**c. Typical Procedure for the synthesis of 2-methylthioindole derivatives 2 (2a-o):**

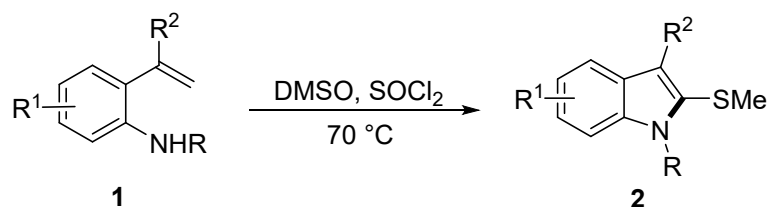

**Method A:** To a solution of substrate **1** (0.5 mmol) in DMSO (1 mL) was slowly added SOCl<sub>2</sub> (2.0 mmol, 239 mg) at 25 °C. The mixture was kept stirring at 70 °C until TLC indicated the total consumption of substrate **1**. Then the reaction mixture was quenched with saturated aq. NaHCO<sub>3</sub> solution (5 mL) and water (20 mL), extracted with EtOAc (3 x 20 mL), combined the organic phase and then evaporated the solvent, purified by flash column chromatography (2% EtOAc/PE) to afford the desired 2-methylthioindole derivatives **2**.

**Method B:** To a solution of substrate **1** (0.5 mmol) in DMSO (1 mL) was slowly added SOCl<sub>2</sub> (2.5 mmol, 299 mg) at 25 °C. The mixture was kept stirring at 70 °C until TLC indicated the total consumption of substrate **1**. Then the reaction mixture was quenched with saturated aq. NaHCO<sub>3</sub> solution (5 mL) and water (20 mL), extracted with EtOAc (3 x 20 mL), combined the organic phase and then evaporated the solvent, purified by flash column chromatography (2% EtOAc/PE) to afford the desired 2-methylthioindole derivatives **2**.

**d. Spectroscopic data of 2-methylthioindole derivatives 2 (2a-o):**

**2-(Methylthio)-3-phenyl-1-tosyl-1H-indole (2a)**

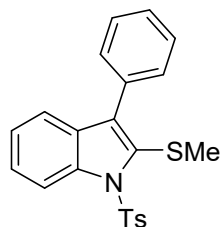

Following the general procedure **Method A**, **2a** was purified by silica gel chromatography (2% EtOAc/PE). A white solid (157 mg, 80%); mp: 116-118 °C. <sup>1</sup>H NMR (400 MHz, CDCl<sub>3</sub>) δ 8.42 (d, *J* = 8.5 Hz, 1H), 7.85 (d, *J* = 8.3 Hz, 2H), 7.54 –

7.36 (m, 7H), 7.28 (s, 1H), 7.21 (d,  $J = 8.3$  Hz, 2H), 2.36 (s, 3H), 2.31 (s, 3H).  $^{13}\text{C}$  NMR (101 MHz,  $\text{CDCl}_3$ )  $\delta$  144.8, 138.0, 136.1, 132.6, 131.6, 130.1, 129.8, 129.6, 129.5, 128.4, 127.9, 127.3, 126.0, 123.8, 120.1, 115.6, 21.7, 21.4. HRMS (ESI) calcd for  $\text{C}_{22}\text{H}_{19}\text{NNaO}_2\text{S}_2^+$  [ $\text{M} + \text{Na}^+$ ] 416.0749, found 416.0755.

#### 5-Chloro-2-(methylthio)-3-phenyl-1-tosyl-1H-indole (2b)

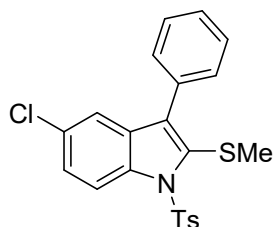

Following the general procedure **Method A**, **2b** was purified by silica gel chromatography (2% EtOAc/PE). A white solid (139 mg, 65%); mp: 148-150 °C.  $^1\text{H}$  NMR (400 MHz,  $\text{CDCl}_3$ )  $\delta$  8.34 (d,  $J = 9.0$  Hz, 1H), 7.82 (d,  $J = 8.4$  Hz, 2H), 7.50 – 7.44 (m, 2H), 7.41 (td,  $J = 5.9, 2.3$  Hz, 4H), 7.36 (dd,  $J = 9.0, 2.2$  Hz, 1H), 7.23 (d,  $J = 8.1$  Hz, 2H), 2.37 (s, 3H), 2.30 (s, 3H).  $^{13}\text{C}$  NMR (101 MHz,  $\text{CDCl}_3$ )  $\delta$  145.1, 136.3, 135.8, 132.0, 131.4, 130.7, 130.6, 130.0, 129.7, 129.7, 128.5, 128.1, 127.3, 126.0, 119.5, 116.7, 21.7, 21.3. HRMS (ESI) calcd for  $\text{C}_{22}\text{H}_{18}^{35}\text{ClNNaO}_2\text{S}_2^+$  [ $\text{M} + \text{Na}^+$ ] 450.0360, found 450.0366.

#### 5-Bromo-2-(methylthio)-3-phenyl-1-tosyl-1H-indole (2c)

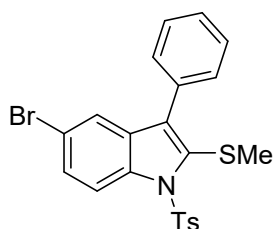

Following the general procedure **Method A**, **2c** was purified by silica gel chromatography (2% EtOAc/PE). A white solid (172 mg, 73%); mp: 139-141 °C.  $^1\text{H}$  NMR (400 MHz,  $\text{CDCl}_3$ )  $\delta$  8.28 (d,  $J = 8.7$  Hz, 1H), 7.88 – 7.78 (m, 2H), 7.55 (d,  $J = 1.7$  Hz, 1H), 7.52 – 7.44 (m, 3H), 7.40 (tt,  $J = 7.8, 1.6$  Hz, 3H), 7.23 (d,  $J = 8.0$  Hz, 2H), 2.37 (s, 3H), 2.29 (s, 3H).  $^{13}\text{C}$  NMR (101 MHz,  $\text{CDCl}_3$ )  $\delta$  145.1, 136.6, 135.8, 132.0, 131.3, 131.2, 130.5, 130.0, 129.7, 128.7, 128.5, 128.1, 127.3, 122.6, 117.4, 117.0, 21.7, 21.3. HRMS (ESI) calcd for  $\text{C}_{22}\text{H}_{18}^{79}\text{BrNNaO}_2\text{S}_2^+$  [ $\text{M} + \text{Na}^+$ ] 493.9855, found 493.9858.

#### 6-Methyl-2-(methylthio)-3-phenyl-1-tosyl-1H-indole (2d)

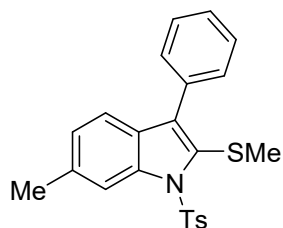

Following the general procedure **Method A**, **2d** was purified by silica gel chromatography (2% EtOAc/PE). A white solid (179 mg, 88%); mp: 139-140 °C. <sup>1</sup>H NMR (400 MHz, CDCl<sub>3</sub>) δ 8.23 (s, 1H), 7.84 (d, *J* = 8.4 Hz, 2H), 7.48 – 7.36 (m, 5H), 7.33 (d, *J* = 8.1 Hz, 1H), 7.21 (d, *J* = 8.1 Hz, 2H), 7.09 (d, *J* = 7.4 Hz, 1H), 2.54 (s, 3H), 2.36 (s, 3H), 2.29 (s, 3H). <sup>13</sup>C NMR (101 MHz, CDCl<sub>3</sub>) δ 144.7, 138.4, 136.2, 132.8, 131.7, 130.1, 129.8, 129.6, 128.9, 128.3, 127.8, 127.3, 127.1, 125.3, 119.7, 115.6, 22.2, 21.7, 21.5. HRMS (ESI) calcd for C<sub>23</sub>H<sub>21</sub>NNaO<sub>2</sub>S<sub>2</sub><sup>+</sup> [*M* + Na<sup>+</sup>] 430.0906, found 430.0902.

### 2-(Methylthio)-3-phenyl-1-tosyl-6-(trifluoromethyl)-1H-indole (**2e**)

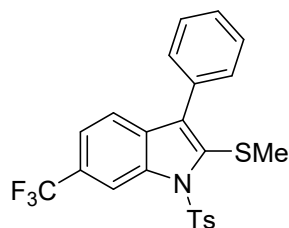

Following the general procedure **Method A**, **2e** was purified by silica gel chromatography (2% EtOAc/PE). A white solid (70 mg, 30%); Following the general procedure **Method B**, **2e** was purified by silica gel chromatography (2% EtOAc/PE). A white solid (113 mg, 49%); mp: 121-123 °C. <sup>1</sup>H NMR (600 MHz, CDCl<sub>3</sub>) δ 8.72 (s, 1H), 7.86 (d, *J* = 8.4 Hz, 2H), 7.53 (d, *J* = 8.3 Hz, 1H), 7.51 – 7.45 (m, 3H), 7.42 (dd, *J* = 5.5, 1.9 Hz, 3H), 7.25 (d, *J* = 9.6 Hz, 2H), 2.38 (s, 3H), 2.27 (s, 3H). <sup>19</sup>F NMR (376 MHz, CDCl<sub>3</sub>) δ -61.09 (s). <sup>13</sup>C NMR (151 MHz, CDCl<sub>3</sub>) δ 145.3, 137.0, 135.8, 132.9, 131.9, 131.8, 130.7, 130.0, 129.7, 128.5, 128.2, 127.8 (q, <sup>2</sup>*J*<sub>C-F</sub> = 32.1 Hz), 127.5, 124.6 (q, <sup>1</sup>*J*<sub>C-F</sub> = 270.5 Hz), 120.4, 113.0 (q, <sup>4</sup>*J*<sub>C-F</sub> = 4.4 Hz), 21.6, 21.1. HRMS (ESI) calcd for C<sub>23</sub>H<sub>18</sub>F<sub>3</sub>NNaO<sub>2</sub>S<sub>2</sub><sup>+</sup> [*M* + Na<sup>+</sup>] 484.0623, found 484.0625.

### 3-(3-Fluorophenyl)-2-(methylthio)-1-tosyl-1H-indole (**2f**)

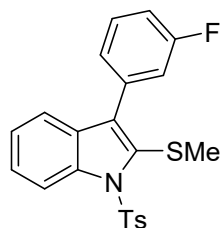

Following the general procedure **Method A**, **2f** was purified by silica gel chromatography (2% EtOAc/PE). A white solid (146 mg, 71%); mp: 83-84 °C. <sup>1</sup>H NMR (600 MHz, CDCl<sub>3</sub>) δ 8.42 (d, *J* = 8.5 Hz, 1H), 7.85 (d, *J* = 8.3 Hz, 2H), 7.42 (dd, *J* = 15.7, 7.3 Hz, 3H), 7.28 (d, *J* = 7.5 Hz, 1H), 7.22 (d, *J* = 8.4 Hz, 3H), 7.16 (d, *J* = 9.8 Hz, 1H), 7.09 (td, *J* = 8.4, 2.3 Hz, 1H), 2.37 (s, 3H), 2.31 (s, 3H). <sup>19</sup>F NMR (376 MHz, CDCl<sub>3</sub>) δ -112.99 (s). <sup>13</sup>C NMR (151 MHz, CDCl<sub>3</sub>) δ 162.7 (d, <sup>1</sup>*J*<sub>C-F</sub> = 244.3 Hz), 144.9, 138.0, 136.1, 134.8 (d, <sup>3</sup>*J*<sub>C-F</sub> = 8.4 Hz), 130.24 (d, <sup>4</sup>*J*<sub>C-F</sub> = 2.0 Hz), 130.21, 129.8 (d, <sup>3</sup>*J*<sub>C-F</sub> = 8.4 Hz), 129.6, 129.1, 127.3, 126.1, 125.9, 123.9, 119.8, 117.1 (d, <sup>2</sup>*J*<sub>C-F</sub> = 21.8 Hz), 115.6, 114.7 (d, <sup>2</sup>*J*<sub>C-F</sub> = 20.9 Hz), 21.6, 21.3. HRMS (ESI) calcd for C<sub>22</sub>H<sub>18</sub>FNNaO<sub>2</sub>S<sub>2</sub><sup>+</sup> [M + Na<sup>+</sup>] 434.0655, found 434.0658.

### 3-(4-Bromophenyl)-2-(methylthio)-1-tosyl-1*H*-indole (**2g**)

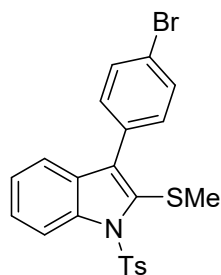

Following the general procedure **Method A**, **2g** was purified by silica gel chromatography (2% EtOAc/PE). A white solid (186 mg, 79%); mp: 116-117 °C. <sup>1</sup>H NMR (600 MHz, CDCl<sub>3</sub>) δ 8.42 (d, *J* = 8.5 Hz, 1H), 7.85 (d, *J* = 8.4 Hz, 2H), 7.59 (d, *J* = 8.4 Hz, 2H), 7.42 (dd, *J* = 16.0, 7.6 Hz, 2H), 7.32 (d, *J* = 8.4 Hz, 2H), 7.27 (d, *J* = 7.7 Hz, 1H), 7.22 (d, *J* = 8.2 Hz, 2H), 2.36 (s, 3H), 2.30 (s, 3H). <sup>13</sup>C NMR (151 MHz, CDCl<sub>3</sub>) δ 144.9, 138.0, 136.1, 131.8, 131.6, 130.4, 130.0, 129.6, 129.0, 127.3, 126.1, 123.9, 122.0, 119.8, 115.6, 21.6, 21.4. HRMS (ESI) calcd for C<sub>22</sub>H<sub>18</sub><sup>79</sup>BrNNaO<sub>2</sub>S<sub>2</sub><sup>+</sup> [M + Na<sup>+</sup>] 493.9855, found 493.9848.

### 3-([1,1'-Biphenyl]-4-yl)-2-(methylthio)-1-tosyl-1*H*-indole (**2h**)

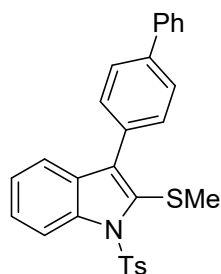

Following the general procedure **Method A**, **2h** was purified by silica gel chromatography (2% EtOAc/PE). A white solid (152 mg, 65%); mp: 201-203 °C. <sup>1</sup>H NMR (400 MHz, CDCl<sub>3</sub>) δ 8.43 (d, *J* = 8.5 Hz, 1H), 7.86 (d, *J* = 8.4 Hz, 2H), 7.72 –

7.68 (m, 2H), 7.66 (dd,  $J = 5.2, 3.3$  Hz, 1H), 7.51 (ddd,  $J = 10.3, 6.8, 1.8$  Hz, 4H), 7.48 – 7.40 (m, 3H), 7.40 – 7.34 (m, 1H), 7.31 – 7.27 (m, 1H), 7.22 (d,  $J = 8.1$  Hz, 2H), 2.36 (s, 3H), 2.36 (s, 3H).  $^{13}\text{C}$  NMR (101 MHz,  $\text{CDCl}_3$ )  $\delta$  144.8, 140.7, 140.6, 138.1, 136.1, 131.6, 131.2, 130.5, 129.8, 129.6, 129.5, 128.8, 127.5, 127.3, 127.1, 127.0, 126.0, 123.8, 120.1, 115.6, 21.6, 21.5. HRMS (ESI) calcd for  $\text{C}_{28}\text{H}_{23}\text{NNaO}_2\text{S}_2^+$   $[\text{M} + \text{Na}^+]$  492.1062, found 492.1068.

### 3-Methyl-2-(methylthio)-1-tosyl-1H-indole (2i)

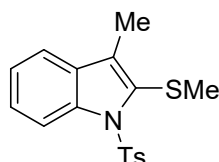

Following the general procedure **Method A**, **2i** was purified by silica gel chromatography (5% EtOAc/PE). Colorless oil (119 mg, 72%);  $^1\text{H}$  NMR (400 MHz,  $\text{CDCl}_3$ )  $\delta$  8.34 (d,  $J = 8.5$  Hz, 1H), 7.78 (d,  $J = 8.4$  Hz, 2H), 7.43 (d,  $J = 8.9$  Hz, 1H), 7.38 (ddd,  $J = 8.5, 7.3, 1.4$  Hz, 1H), 7.31 – 7.27 (m, 1H), 7.17 (d,  $J = 8.0$  Hz, 2H), 2.38 (s, 3H), 2.33 (s, 3H), 2.31 (s, 3H).  $^{13}\text{C}$  NMR (101 MHz,  $\text{CDCl}_3$ )  $\delta$  144.5, 138.0, 136.3, 130.2, 129.5, 129.2, 127.4, 127.1, 125.8, 123.4, 119.3, 115.5, 21.6, 20.9, 10.2. HRMS (ESI) calcd for  $\text{C}_{17}\text{H}_{17}\text{NNaO}_2\text{S}_2^+$   $[\text{M} + \text{Na}^+]$  354.0598, found 354.0599.

### 2-(Methylthio)-3-phenyl-1-(m-tolylsulfonyl)-1H-indole (2j)

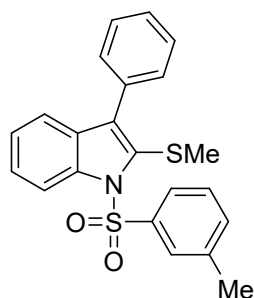

Following the general procedure **Method A**, **2j** was purified by silica gel chromatography (5% EtOAc/PE). A white solid (159 mg, 81%); mp: 107-108 °C.  $^1\text{H}$  NMR (400 MHz,  $\text{CDCl}_3$ )  $\delta$  8.41 (d,  $J = 8.5$  Hz, 1H), 7.80 (s, 1H), 7.74 (d,  $J = 7.7$  Hz, 1H), 7.50 – 7.39 (m, 7H), 7.36 – 7.24 (m, 3H), 2.36 (s, 3H), 2.29 (s, 3H).  $^{13}\text{C}$  NMR (101 MHz,  $\text{CDCl}_3$ )  $\delta$  139.2, 138.9, 138.0, 134.6, 132.6, 131.7, 130.1, 129.8, 129.5, 128.8, 128.4, 127.9, 127.6, 126.0, 124.4, 123.8, 120.1, 115.5, 21.39, 21.37. HRMS (ESI) calcd for  $\text{C}_{22}\text{H}_{19}\text{NNaO}_2\text{S}_2^+$   $[\text{M} + \text{Na}^+]$  416.0749, found 416.0742.

### 1-((4-Chlorophenyl)sulfonyl)-2-(methylthio)-3-phenyl-1H-indole (2k)

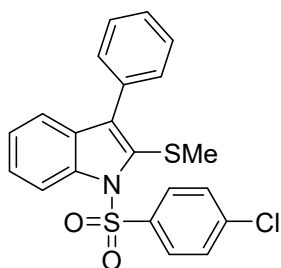

Following the general procedure **Method A**, **2k** was purified by silica gel chromatography (5% EtOAc/PE). A white solid (147 mg, 71%); mp: 114-115 °C. <sup>1</sup>H NMR (600 MHz, CDCl<sub>3</sub>) δ 8.39 (d, *J* = 8.5 Hz, 1H), 7.90 (d, *J* = 8.6 Hz, 2H), 7.49 – 7.45 (m, 3H), 7.45 – 7.38 (m, 6H), 7.28 (t, *J* = 7.6 Hz, 1H), 2.34 (s, 3H). <sup>13</sup>C NMR (151 MHz, CDCl<sub>3</sub>) δ 140.4, 138.0, 137.4, 132.4, 132.2, 130.1, 129.69, 129.66, 129.3, 128.7, 128.4, 128.0, 126.2, 124.1, 120.3, 115.5, 21.3. HRMS (ESI) calcd for C<sub>21</sub>H<sub>16</sub>ClNNaO<sub>2</sub>S<sub>2</sub><sup>+</sup> [M + Na<sup>+</sup>] 436.0203, found 436.0208.

#### 1-((4-Bromophenyl)sulfonyl)-2-(methylthio)-3-phenyl-1H-indole (**2l**)

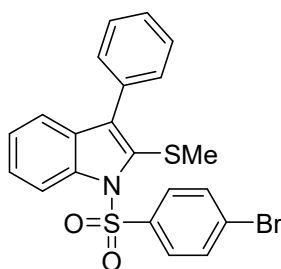

Following the general procedure **Method A**, **2l** was purified by silica gel chromatography (2% EtOAc/PE). A white solid (153 mg, 67%); mp: 114-115 °C. <sup>1</sup>H NMR (600 MHz, CDCl<sub>3</sub>) δ 8.38 (d, *J* = 8.5 Hz, 1H), 7.82 (d, *J* = 8.6 Hz, 2H), 7.56 (d, *J* = 8.5 Hz, 2H), 7.47 (dd, *J* = 14.1, 7.0 Hz, 3H), 7.44 – 7.39 (m, 4H), 7.28 (t, *J* = 7.6 Hz, 1H), 2.34 (s, 3H). <sup>13</sup>C NMR (151 MHz, CDCl<sub>3</sub>) δ 138.0, 137.9, 132.4, 132.3, 132.2, 130.1, 129.7, 129.0, 128.8, 128.5, 128.4, 128.0, 126.2, 124.1, 120.3, 115.5, 21.3. HRMS (ESI) calcd for C<sub>21</sub>H<sub>16</sub><sup>79</sup>BrNNaO<sub>2</sub>S<sub>2</sub><sup>+</sup> [M + Na<sup>+</sup>] 479.9698, found 479.9688.

#### 1-((4-Methoxyphenyl)sulfonyl)-2-(methylthio)-3-phenyl-1H-indole (**2m**)

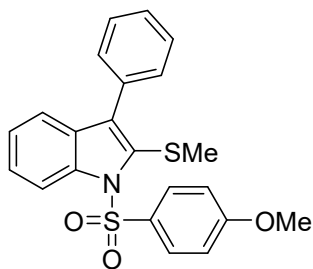

Following the general procedure **Method A**, **2m** was purified by silica gel



chromatography (5% EtOAc/PE). A white solid (147 mg, 72%); mp: 122-124 °C. <sup>1</sup>H NMR (600 MHz, CDCl<sub>3</sub>) δ 8.42 (d, *J* = 8.5 Hz, 1H), 7.92 (d, *J* = 8.9 Hz, 2H), 7.49 – 7.38 (m, 7H), 7.28 – 7.24 (d, 1H), 6.87 (d, *J* = 9.0 Hz, 2H), 3.81 (s, 3H), 2.32 (s, 3H). <sup>13</sup>C NMR (151 MHz, CDCl<sub>3</sub>) δ 163.7, 138.0, 132.7, 131.5, 130.7, 130.1, 129.9, 129.56, 129.54, 128.3, 127.8, 125.9, 123.7, 120.0, 115.6, 114.1, 55.6, 21.3. HRMS (ESI) calcd for C<sub>22</sub>H<sub>19</sub>NNaO<sub>3</sub>S<sub>2</sub><sup>+</sup> [*M* + Na<sup>+</sup>] 432.0699, found 432.0690.

### 2-(Methylthio)-1-((4-nitrophenyl)sulfonyl)-3-phenyl-1*H*-indole (2n)

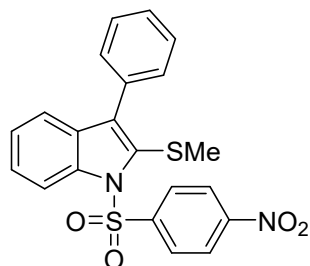

Following the general procedure **Method A**, **2n** was purified by silica gel chromatography (5% EtOAc/PE). A yellow solid (172 mg, 81%); mp: 96-98 °C. <sup>1</sup>H NMR (600 MHz, CDCl<sub>3</sub>) δ 8.39 (d, *J* = 8.7 Hz, 1H), 8.27 (d, *J* = 8.7 Hz, 2H), 8.14 (d, *J* = 8.5 Hz, 2H), 7.46 (d, *J* = 6.9 Hz, 4H), 7.41 (t, *J* = 7.5 Hz, 3H), 7.31 (t, *J* = 7.5 Hz, 1H), 2.37 (s, 3H). <sup>13</sup>C NMR (151 MHz, CDCl<sub>3</sub>) δ 150.6, 144.2, 137.9, 132.9, 132.0, 130.0, 129.8, 129.5, 128.6, 128.5, 128.2, 126.5, 124.6, 124.2, 120.5, 115.5, 21.4. HRMS (ESI) calcd for C<sub>21</sub>H<sub>16</sub>N<sub>2</sub>NaO<sub>4</sub>S<sub>2</sub><sup>+</sup> [*M* + Na<sup>+</sup>] 447.0444, found 447.0448.

### 2-(Methylthio)-3-phenyl-1-(phenylsulfonyl)-1*H*-indole (2o)

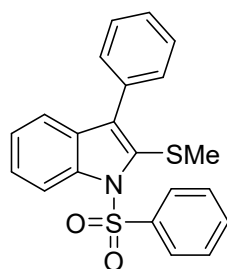

Following the general procedure **Method A**, **2o** was purified by silica gel chromatography (5% EtOAc/petroleum ether). A white solid (155mg, 82%); mp: 110-111 °C. <sup>1</sup>H NMR (400 MHz, CDCl<sub>3</sub>) δ 8.42 (dd, *J* = 8.5, 0.7 Hz, 1H), 7.96 (dd, *J* = 7.5, 0.9 Hz, 2H), 7.58 – 7.51 (m, 1H), 7.49 – 7.37 (m, 9H), 7.27 (t, *J* = 7.5 Hz, 1H), 2.29 (s, 3H). <sup>13</sup>C NMR (101 MHz, CDCl<sub>3</sub>) δ 139.0, 138.1, 133.7, 132.5, 131.8, 130.1, 129.8, 129.5, 129.0, 128.4, 127.9, 127.3, 126.0, 123.9, 120.1, 115.6, 21.3. HRMS (ESI) calcd for C<sub>21</sub>H<sub>17</sub>NNaO<sub>2</sub>S<sub>2</sub><sup>+</sup> [*M* + Na<sup>+</sup>] 402.0593, found 402.0596.

**e. Typical procedure for the synthesis of 2-(*d*<sub>3</sub>-methylthio) indole derivatives 2 (2p-s):**

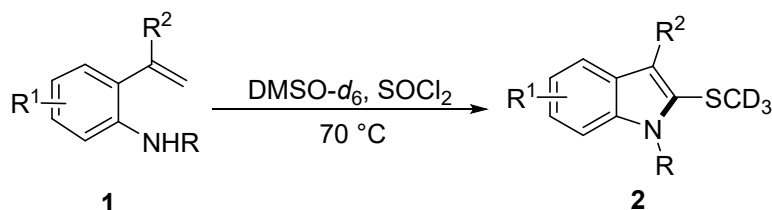

**General procedure:** To a solution of substrate **1** (0.5 mmol) in DMSO-*d*<sub>6</sub> (1 mL) was slowly added SOCl<sub>2</sub> (2.0 mmol, 239 mg) at 25 °C. The mixture was kept stirring at 70 °C until TLC indicated the total consumption of substrate **1**. Then the reaction mixture was quenched with saturated aq. NaHCO<sub>3</sub> solution (5 mL) and water (20 mL), extracted with EtOAc (3 x 20 mL), combined the organic phase and then evaporated the solvent, purified by flash column chromatography (2% EtOAc/PE) to afford the desired 2-(*d*<sub>3</sub>-methylthio)indole derivatives **2**.

**f. Spectroscopic data of 2-(*d*<sub>3</sub>-methylthio) indole derivatives 2 (2p-s):**

**2-(*d*<sub>3</sub>-Methylthio)-3-phenyl-1-tosyl-1*H*-indole (2p)**

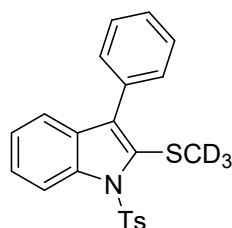

Following the general procedure, **2p** was purified by silica gel chromatography (2% EtOAc/PE). A white solid (157 mg, 80%); mp: 116-117 °C. <sup>1</sup>H NMR (600 MHz, CDCl<sub>3</sub>) δ 8.41 (d, *J* = 8.5 Hz, 1H), 7.85 (d, *J* = 8.4 Hz, 2H), 7.49 – 7.44 (m, 5H), 7.43 – 7.39 (m, 2H), 7.26 (d, *J* = 15.1 Hz, 1H), 7.21 (d, *J* = 8.3 Hz, 2H), 2.36 (s, 3H). <sup>13</sup>C NMR (151 MHz, CDCl<sub>3</sub>) δ 144.7, 138.1, 136.2, 132.7, 131.6, 130.1, 129.8, 129.6, 128.3, 127.8, 127.3, 125.9, 123.8, 120.0, 115.6, 21.6. HRMS (ESI) calcd for C<sub>22</sub>H<sub>16</sub>D<sub>3</sub>NNaO<sub>2</sub>S<sub>2</sub><sup>+</sup> [M + Na<sup>+</sup>] 416.0749, found 416.0745.

**5-Chloro-2-(*d*<sub>3</sub>-methylthio)-3-phenyl-1-tosyl-1*H*-indole (2q)**

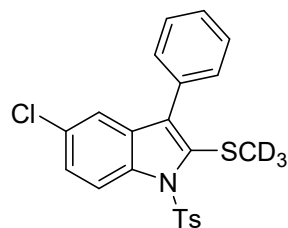

Following the general procedure, **2q** was purified by silica gel chromatography (2% EtOAc/PE). A white solid (141 mg, 66%); m.p. 150-151 °C. <sup>1</sup>H NMR (600 MHz, CDCl<sub>3</sub>) δ 8.33 (d, *J* = 9.0 Hz, 1H), 7.82 (d, *J* = 8.3 Hz, 2H), 7.47 (t, *J* = 7.4 Hz, 2H), 7.43 – 7.38 (m, 4H), 7.36 (dd, *J* = 9.0, 2.1 Hz, 1H), 7.23 (d, *J* = 8.2 Hz, 2H), 2.37 (s, 3H). <sup>13</sup>C NMR (151 MHz, CDCl<sub>3</sub>) δ 145.1, 136.3, 135.9, 132.0, 131.4, 130.8, 130.6, 130.0, 129.74, 129.65, 128.5, 128.1, 127.3, 126.0, 119.5, 116.7, 21.6. HRMS (ESI) calcd for C<sub>22</sub>H<sub>15</sub>D<sub>3</sub>ClNNaO<sub>2</sub>S<sub>2</sub><sup>+</sup> [M + Na<sup>+</sup>] 450.0360, found 450.0368.

### 3-(4-Bromophenyl)-2-(*d*<sub>3</sub>-methylthio)-1-tosyl-1*H*-indole (**2r**)

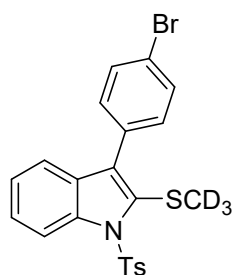

Following the general procedure, **2r** was purified by silica gel chromatography (10% EtOAc/PE). A white solid (177 mg, 75%); mp: 117-118 °C. <sup>1</sup>H NMR (600 MHz, CDCl<sub>3</sub>) δ 8.41 (d, *J* = 8.5 Hz, 1H), 7.85 (d, *J* = 8.4 Hz, 2H), 7.63 – 7.55 (m, 2H), 7.41 (dd, *J* = 16.8, 8.3 Hz, 2H), 7.33 – 7.30 (m, 2H), 7.27 (t, *J* = 7.5 Hz, 1H), 7.22 (d, *J* = 8.2 Hz, 2H), 2.36 (s, 3H). <sup>13</sup>C NMR (151 MHz, CDCl<sub>3</sub>) δ 144.9, 138.0, 136.2, 131.8, 131.6, 130.4, 130.0, 129.6, 129.1, 127.3, 126.1, 123.9, 122.0, 119.8, 115.6, 21.6. HRMS (ESI) calcd for C<sub>22</sub>H<sub>15</sub>D<sub>3</sub>BrNNaO<sub>2</sub>S<sub>2</sub><sup>+</sup> [M + Na<sup>+</sup>] 493.9855, found 493.9858.

### 3-Methyl-2-(methylthio)-1-tosyl-1*H*-indole (**2s**)

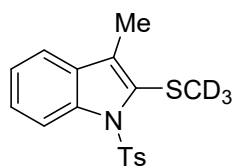

Following the general procedure, **2s** was purified by silica gel chromatography (5% EtOAc/PE). Colorless oil (116 mg, 70%). <sup>1</sup>H NMR (400 MHz, CDCl<sub>3</sub>) δ 8.37 – 8.31 (m, 1H), 7.81 – 7.75 (m, 2H), 7.43 (ddd, *J* = 7.8, 1.2, 0.6 Hz, 1H), 7.38 (ddd, *J* = 8.5, 7.3, 1.4 Hz, 1H), 7.28 (dd, *J* = 11.4, 4.5 Hz, 1H), 7.17 (d, *J* = 8.1 Hz, 2H), 2.33 (s, 3H), 2.31 (s, 3H). <sup>13</sup>C NMR (101 MHz, CDCl<sub>3</sub>) δ 144.5, 138.0, 136.2, 130.2, 129.5, 129.2, 127.4, 127.1, 125.8, 123.4, 119.3, 115.5, 21.6, 10.2. HRMS (ESI) calcd for C<sub>17</sub>H<sub>14</sub>D<sub>3</sub>NNaO<sub>2</sub>S<sub>2</sub><sup>+</sup> [M + Na<sup>+</sup>] 354.0593, found 354.0596.

**g. Typical procedure for the synthesis of 2-unsubstituted indole derivatives 3 (3a-j):**

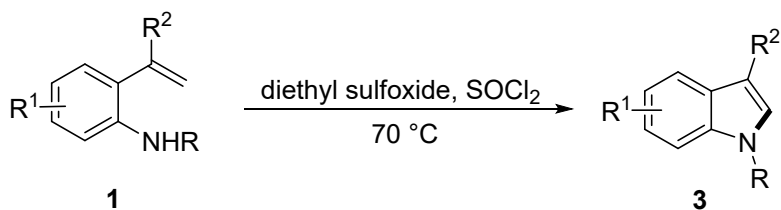

To a solution of substrate **1** (0.5 mmol) in diethyl sulfoxide (1 mL) was slowly added SOCl<sub>2</sub> (1.5 mmol, 179 mg) at 25 °C. The mixture was kept stirring at 70 °C until TLC indicated the total consumption of substrate **1**. Then the reaction mixture was quenched with saturated aq. NaHCO<sub>3</sub> solution (5 mL) and water (20 mL), extracted with EtOAc (3 x 20 mL), combined the organic phase and then evaporated the solvent, purified by flash column chromatography (2% EtOAc/PE) to afford the desired 2-methylthioindole derivatives **3**.

#### h. Spectroscopic data of 2-unsubstituted indole derivatives **3** (3a-j):

##### 3-Phenyl-1-tosyl-1*H*-indole (**3a**)

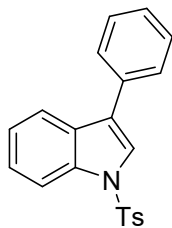

Following the general procedure, **3a** was purified by silica gel chromatography (5% EtOAc/PE). A white solid (158 mg, 91%); mp: 144-145 °C. <sup>1</sup>H NMR (400 MHz, CDCl<sub>3</sub>) δ 8.08 (d, *J* = 8.3 Hz, 1H), 7.81 (t, *J* = 9.5 Hz, 3H), 7.71 (d, *J* = 1.9 Hz, 1H), 7.62 (d, *J* = 8.0 Hz, 2H), 7.47 (t, *J* = 7.6 Hz, 2H), 7.41 – 7.35 (m, 2H), 7.29 (t, *J* = 7.6 Hz, 1H), 7.23 (d, *J* = 8.3 Hz, 2H), 2.34 (s, 3H). <sup>13</sup>C NMR (101 MHz, CDCl<sub>3</sub>) δ 145.1, 135.6, 135.2, 133.1, 130.0, 129.3, 128.9, 127.9, 127.6, 126.9, 124.9, 124.0, 123.6, 123.0, 120.5, 113.9, 21.6. HRMS (ESI) calcd for C<sub>21</sub>H<sub>17</sub>NNaO<sub>2</sub>S<sup>+</sup> [M + Na<sup>+</sup>] 370.0872, found 370.0878.

##### 5-Chloro-3-phenyl-1-tosyl-1*H*-indole (**3b**)

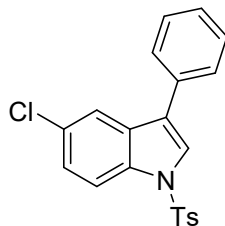

Following the general procedure, **3b** was purified by silica gel chromatography (5%

EtOAc/PE). A white solid (158 mg, 83%); mp: 115-116 °C. <sup>1</sup>H NMR (400 MHz, CDCl<sub>3</sub>) δ 7.98 (dd, *J* = 8.8, 2.7 Hz, 1H), 7.79 (dd, *J* = 8.3, 1.7 Hz, 2H), 7.76 – 7.69 (m, 2H), 7.56 (d, *J* = 7.4 Hz, 2H), 7.47 (t, *J* = 7.6 Hz, 2H), 7.39 (t, *J* = 7.3 Hz, 1H), 7.32 (dd, *J* = 8.8, 1.2 Hz, 1H), 7.25 (d, *J* = 9.1 Hz, 2H), 2.36 (s, 3H). <sup>13</sup>C NMR (101 MHz, CDCl<sub>3</sub>) δ 145.4, 134.9, 133.9, 132.4, 130.6, 130.1, 129.6, 129.1, 127.9, 126.9, 125.2, 124.2, 123.5, 120.2, 114.9, 21.6. HRMS (ESI) calcd for C<sub>21</sub>H<sub>16</sub><sup>35</sup>ClNNaO<sub>2</sub>S<sup>+</sup> [M + Na<sup>+</sup>] 404.0482, found 404.0488.

### 5-Bromo-3-phenyl-1-tosyl-1H-indole (3c)

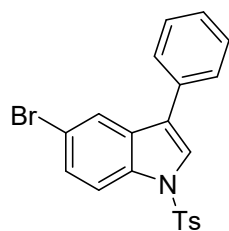

Following the general procedure, **3c** was purified by silica gel chromatography (5% EtOAc/PE). A white solid (183 mg, 86%); mp: 132-134 °C. <sup>1</sup>H NMR (600 MHz, CDCl<sub>3</sub>) δ 7.93 (d, *J* = 8.8 Hz, 1H), 7.89 (d, *J* = 1.8 Hz, 1H), 7.79 (d, *J* = 8.4 Hz, 2H), 7.68 (s, 1H), 7.55 (d, *J* = 7.1 Hz, 2H), 7.50 – 7.44 (m, 3H), 7.39 (t, *J* = 7.4 Hz, 1H), 7.25 (d, *J* = 8.2 Hz, 2H), 2.36 (s, 3H). <sup>13</sup>C NMR (151 MHz, CDCl<sub>3</sub>) δ 145.4, 134.2, 132.4, 131.1, 130.1, 129.1, 127.9, 127.9, 127.8, 126.9, 124.1, 123.4, 123.2, 117.3, 115.3, 21.6. HRMS (ESI) calcd for C<sub>21</sub>H<sub>16</sub><sup>79</sup>BrNNaO<sub>2</sub>S<sup>+</sup> [M + Na<sup>+</sup>] 447.9977, found 447.9973.

### 6-Methyl-3-phenyl-1-tosyl-1H-indole (3d)

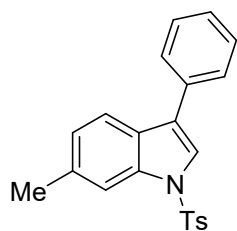

Following the general procedure, **3d** was purified by silica gel chromatography (5% EtOAc/PE). A white solid (134 mg, 74%); mp: 120-121 °C. <sup>1</sup>H NMR (600 MHz, CDCl<sub>3</sub>) δ 7.87 (s, 1H), 7.80 (d, *J* = 8.4 Hz, 2H), 7.66 (d, *J* = 8.1 Hz, 1H), 7.63 (s, 1H), 7.60 (dd, *J* = 8.0, 1.0 Hz, 2H), 7.46 (t, *J* = 7.7 Hz, 2H), 7.36 (t, *J* = 7.4 Hz, 1H), 7.23 (d, *J* = 8.2 Hz, 2H), 7.12 (d, *J* = 7.6 Hz, 1H), 2.51 (s, 3H), 2.35 (s, 3H). <sup>13</sup>C NMR (151 MHz, CDCl<sub>3</sub>) δ 144.9, 136.0, 135.5, 135.1, 133.3, 129.9, 128.9, 127.8, 127.5, 127.1, 126.9, 125.1, 123.9, 122.4, 120.0, 114.0, 21.9, 21.6. HRMS (ESI) calcd for C<sub>22</sub>H<sub>19</sub>NNaO<sub>2</sub>S<sup>+</sup> [M + Na<sup>+</sup>] 384.1029, found 384.1025.

### 3-Phenyl-1-tosyl-6-(trifluoromethyl)-1*H*-indole (3e)

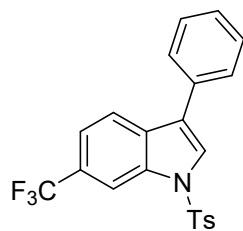

Following the general procedure, **3e** was purified by silica gel chromatography (5% EtOAc/PE). A white solid (145 mg, 70%); mp: 132-134 °C. <sup>1</sup>H NMR (400 MHz, CDCl<sub>3</sub>) δ 8.35 (s, 1H), 7.87 (d, *J* = 8.4 Hz, 1H), 7.85 – 7.80 (m, 3H), 7.58 (d, *J* = 7.5 Hz, 2H), 7.53 (d, *J* = 8.4 Hz, 1H), 7.49 (t, *J* = 7.5 Hz, 2H), 7.40 (t, *J* = 7.3 Hz, 1H), 7.27 (d, *J* = 8.1 Hz, 2H), 2.37 (s, 3H). <sup>19</sup>F NMR (376 MHz, CDCl<sub>3</sub>) δ -61.09 (s). <sup>13</sup>C NMR (101 MHz, CDCl<sub>3</sub>) δ 145.6, 134.8, 134.6, 132.3, 131.7, 130.2, 129.1, 128.0, 127.9, 127.1 (q, <sup>2</sup>*J*<sub>C-F</sub> = 32.4 Hz), 127.0, 125.3, 124.5 (q, <sup>1</sup>*J*<sub>C-F</sub> = 270.4 Hz), 123.8, 121.0, 120.3 (q, <sup>3</sup>*J*<sub>C-F</sub> = 3.5 Hz), 111.3 (q, <sup>3</sup>*J*<sub>C-F</sub> = 4.4 Hz), 21.6. HRMS (ESI) calcd for C<sub>22</sub>H<sub>16</sub>F<sub>3</sub>NNaO<sub>2</sub>S<sup>+</sup> [M + Na<sup>+</sup>] 438.0746, found 438.0741.

### 3-(2-Methoxyphenyl)-1-tosyl-1*H*-indole (3f)

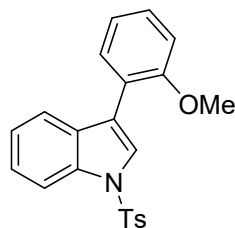

Following the general procedure, **3f** was purified by silica gel chromatography (5% EtOAc/PE). Colorless oil (117 mg, 62%). <sup>1</sup>H NMR (400 MHz, CDCl<sub>3</sub>) δ 8.05 (d, *J* = 8.3 Hz, 1H), 7.85 – 7.79 (m, 3H), 7.61 (d, *J* = 7.9 Hz, 1H), 7.51 (d, *J* = 7.5 Hz, 1H), 7.38 – 7.30 (m, 2H), 7.25 – 7.19 (m, 3H), 7.09 – 7.01 (m, 2H), 3.84 (s, 3H), 2.34 (s, 3H). <sup>13</sup>C NMR (101 MHz, CDCl<sub>3</sub>) δ 156.9, 144.9, 135.4, 135.0, 130.6, 130.3, 129.9, 128.8, 126.9, 125.3, 124.5, 123.2, 121.8, 121.2, 120.7, 119.5, 113.7, 111.3, 55.5, 21.6. HRMS (ESI) calcd for C<sub>22</sub>H<sub>19</sub>NNaO<sub>3</sub>S<sup>+</sup> [M + Na<sup>+</sup>] 400.0978, found 400.0972.

### 3-(3-Fluorophenyl)-1-tosyl-1*H*-indole (3g)

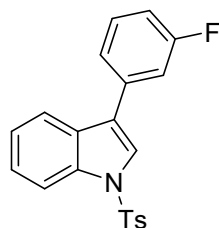

Following the general procedure, **3g** was purified by silica gel chromatography (5% EtOAc/PE). Colorless oil (139 mg, 76%). <sup>1</sup>H NMR (600 MHz, CDCl<sub>3</sub>) δ 8.06 (d, *J* =

8.3 Hz, 1H), 7.82 (d,  $J = 8.4$  Hz, 2H), 7.76 (d,  $J = 7.9$  Hz, 1H), 7.72 (s, 1H), 7.42 (td,  $J = 7.9, 5.9$  Hz, 1H), 7.38 (ddd,  $J = 6.3, 3.8, 1.2$  Hz, 2H), 7.33 – 7.28 (m, 2H), 7.24 (d,  $J = 8.1$  Hz, 2H), 7.09 – 7.03 (m, 1H), 2.35 (s, 3H).  $^{19}\text{F}$  NMR (376 MHz,  $\text{CDCl}_3$ )  $\delta$  -112.58 (s).  $^{13}\text{C}$  NMR (151 MHz,  $\text{CDCl}_3$ )  $\delta$  163.1 (d,  $^1J_{\text{C-F}} = 244.6$  Hz), 145.1, 135.5, 135.3 (d,  $^3J_{\text{C-F}} = 8.1$  Hz), 135.2, 130.4 (d,  $^3J_{\text{C-F}} = 8.5$  Hz), 130.0, 128.9, 126.9, 125.1, 123.7, 123.5 (d,  $^4J_{\text{C-F}} = 2.8$  Hz), 123.4, 122.8 (d,  $^4J_{\text{C-F}} = 2.3$  Hz), 120.2, 114.7 (d,  $^2J_{\text{C-F}} = 22.0$  Hz), 114.3 (d,  $^2J_{\text{C-F}} = 21.0$  Hz), 113.9, 21.6. HRMS (ESI) calcd for  $\text{C}_{21}\text{H}_{16}\text{FNNaO}_2\text{S}^+$  [ $\text{M} + \text{Na}^+$ ] 388.0778, found 388.0771.

### 3-(4-Bromophenyl)-1-tosyl-1H-indole (3h)

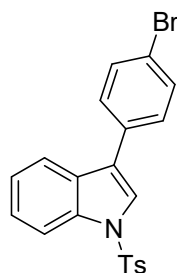

Following the general procedure, **3h** was purified by silica gel chromatography (5% EtOAc/PE). Colorless oil (159 mg, 75%).  $^1\text{H}$  NMR (600 MHz,  $\text{CDCl}_3$ )  $\delta$  8.06 (d,  $J = 8.3$  Hz, 1H), 7.82 (d,  $J = 8.3$  Hz, 2H), 7.72 (d,  $J = 7.9$  Hz, 1H), 7.70 (s, 1H), 7.59 (d,  $J = 8.4$  Hz, 2H), 7.47 (d,  $J = 8.4$  Hz, 2H), 7.38 (t,  $J = 7.7$  Hz, 1H), 7.30 (t,  $J = 7.5$  Hz, 1H), 7.24 (d,  $J = 8.2$  Hz, 2H), 2.34 (s, 3H).  $^{13}\text{C}$  NMR (151 MHz,  $\text{CDCl}_3$ )  $\delta$  145.2, 135.5, 135.3, 132.1, 130.0, 129.4, 128.9, 126.9, 125.1, 123.7, 123.1, 122.8, 121.5, 120.2, 113.9, 21.6. HRMS (ESI) calcd for  $\text{C}_{21}\text{H}_{16}^{79}\text{BrNNaO}_2\text{S}^+$  [ $\text{M} + \text{Na}^+$ ] 447.9977, found 447.9973.

### 3-Methyl-1-tosyl-1H-indole (3i)

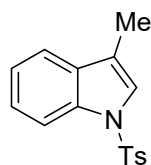

Following the general procedure, **3i** was purified by silica gel chromatography (10% EtOAc/PE). A white solid (98 mg, 69%); mp: 96-97 °C.  $^1\text{H}$  NMR (400 MHz,  $\text{CDCl}_3$ )  $\delta$  7.99 (d,  $J = 8.9$  Hz, 1H), 7.75 (d,  $J = 8.3$  Hz, 2H), 7.45 (d,  $J = 7.5$  Hz, 1H), 7.35 – 7.29 (m, 2H), 7.26 – 7.22 (m, 1H), 7.19 (d,  $J = 8.3$  Hz, 2H), 2.32 (s, 3H), 2.24 (s, 3H).  $^{13}\text{C}$  NMR (101 MHz,  $\text{CDCl}_3$ )  $\delta$  144.7, 135.5, 135.3, 131.8, 129.8, 126.8, 124.6, 123.1, 123.0, 119.4, 118.6, 113.7, 21.6, 9.7. HRMS (ESI) calcd for  $\text{C}_{16}\text{H}_{15}\text{NNaO}_2\text{S}^+$  [ $\text{M} + \text{Na}^+$ ] 308.0716, found 308.0712.

### 3-Pentyl-1-tosyl-1H-indole (3j)

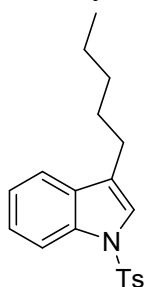

Following the general procedure, **3j** was purified by silica gel chromatography (5% EtOAc/PE). A white solid (121 mg, 71%); mp: 59-60 °C. <sup>1</sup>H NMR (400 MHz, CDCl<sub>3</sub>) δ 7.99 (d, *J* = 8.2 Hz, 1H), 7.74 (d, *J* = 8.3 Hz, 2H), 7.47 (d, *J* = 7.8 Hz, 1H), 7.33 – 7.27 (m, 2H), 7.21 (dd, *J* = 17.4, 8.0 Hz, 3H), 2.64 (t, *J* = 7.6 Hz, 2H), 2.32 (s, 3H), 1.74 – 1.63 (m, 2H), 1.39 – 1.30 (m, 4H), 0.90 (t, *J* = 6.9 Hz, 3H). <sup>13</sup>C NMR (101 MHz, CDCl<sub>3</sub>) δ 144.6, 135.4, 135.4, 131.3, 129.8, 126.7, 124.5, 123.7, 122.9, 122.6, 119.5, 113.8, 31.6, 28.6, 24.8, 22.5, 21.5, 14.1. HRMS (ESI) calcd for C<sub>20</sub>H<sub>23</sub>NNaO<sub>2</sub>S<sup>+</sup> [*M* + Na<sup>+</sup>] 364.1342, found 364.1346.

#### i. Procedure and spectroscopic data of compounds 4-13

##### 2-(Methylsulfinyl)-3-phenyl-1-tosyl-1H-indole (4)<sup>2</sup>

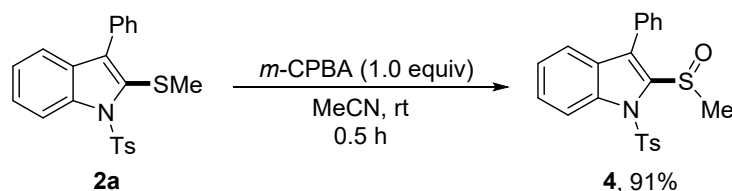

To a solution of compound **2a** (0.5 mmol) in MeCN (2.0 mL) was added *meta*-chloroperoxybenzoic acid (*m*-CPBA) (0.5 mmol) at 0 °C, and the mixture was stirred at room temperature. The progress of the reaction was monitored by TLC. Upon completion of the reaction, MeCN was removed *in vacuo*. The residue was admixed with DCM (30 mL) and the resultant solution was washed with water (30 mL × 3). The organic layer was further washed with aq. NaOH solution, then washed with brine, dried with anhydrous Na<sub>2</sub>SO<sub>4</sub>, and concentrated *in vacuo*. The crude residue was purified on silica gel (30% EtOAc/petroleum ether) to afford the corresponding sulfoxide **4** as a white solid (186 mg, 91 %), mp: 183–184 °C. <sup>1</sup>H NMR (400 MHz, CDCl<sub>3</sub>) δ 8.31 (d, *J* = 8.5 Hz, 1H), 7.96 (d, *J* = 8.4 Hz, 2H), 7.50 (ddd, *J* = 8.6, 7.2, 1.3 Hz, 1H), 7.47 – 7.40 (m, 5H), 7.38 (d, *J* = 7.7 Hz, 1H), 7.29 (d, *J* = 7.2 Hz, 1H), 7.23 (d, *J* = 8.1 Hz, 2H), 3.23 (s, 3H), 2.35 (s, 3H). <sup>13</sup>C NMR (101 MHz, CDCl<sub>3</sub>) δ 145.6, 137.4, 135.8, 134.2, 133.1, 130.7, 130.4, 130.1, 129.9, 128.7, 128.3, 127.8,



127.5, 124.5, 121.4, 115.1, 41.9, 21.7. HRMS (ESI) calcd for  $C_{22}H_{19}NNaO_3S_2^+$  [ $M + Na^+$ ] 432.0699, found 432.0697.

### 2,3-Diphenyl-1-tosyl-1*H*-indole (**5**)

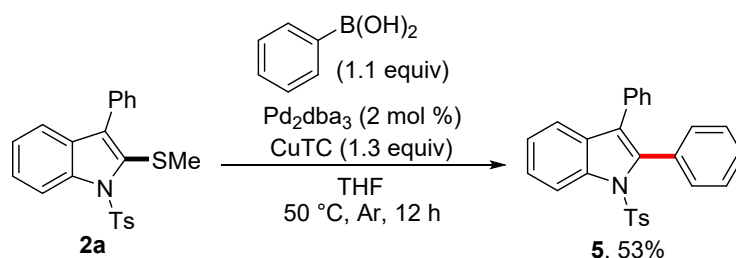

2-Methylthioindole (0.50 mmol), phenylboronic acid (0.55 mmol),  $Pd_2dba_3$  (0.01 mmol), and  $CuTC$  (0.65 mmol) were placed in a reaction vessel, which was flushed with argon. Then THF (5 mL) was added, and the reaction mixture was stirred at 50 °C for 12 h. When the reaction was completed (monitored by TLC),  $Et_2O$  (15 mL) was added, and then the mixture was extracted with a saturated aqueous solution of  $NH_4OH$  ( $3 \times 20$  mL). The organic layer was then dried with  $Na_2SO_4$ , and solid residues after evaporation were subjected to preparative plate silica gel chromatography (5%  $EtOAc$ /petroleum ether), giving the desired product **5** as a white solid (112 mg, 53%), mp: 145–146 °C.  $^1H$  NMR (400 MHz,  $CDCl_3$ )  $\delta$  8.41 (d,  $J = 8.4$  Hz, 1H), 7.48 (d,  $J = 7.8$  Hz, 1H), 7.44 – 7.38 (m, 1H), 7.33 (d,  $J = 8.2$  Hz, 3H), 7.29 (dd,  $J = 7.7, 2.4$  Hz, 2H), 7.25 (d,  $J = 7.1$  Hz, 3H), 7.20 (dd,  $J = 8.9, 6.1$  Hz, 3H), 7.09 (d,  $J = 1.9$  Hz, 1H), 7.06 (d,  $J = 8.2$  Hz, 3H), 2.30 (s, 3H).  $^{13}C$  NMR (101 MHz,  $CDCl_3$ )  $\delta$  144.6, 137.3, 136.9, 135.4, 132.7, 132.1, 130.9, 130.5, 129.9, 129.3, 128.5, 128.2, 127.3, 127.0, 125.2, 124.8, 124.2, 120.0, 116.3, 21.6. HRMS (ESI) calcd for  $C_{27}H_{21}NNaO_2S^+$  [ $M + Na^+$ ] 446.1185, found 446.1183.

### 3-Methyl-1-tosyl-1*H*-indole-2-carbonitrile (**6**)<sup>3</sup>

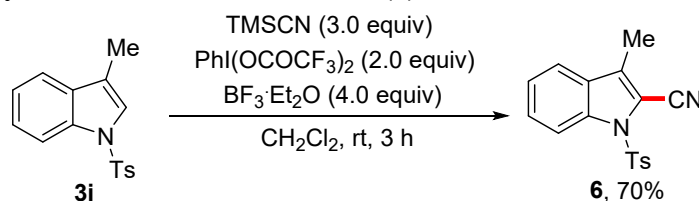

To a stirred solution of PIFA (1.0 mmol) and  $BF_3 \cdot Et_2O$  (2.0 mmol) in  $CH_2Cl_2$  (1 mL) added trimethylsilyl cyanide (1.5 mmol) at room temperature. After stirring 30 min, 3-methyl-1-tosyl-1*H*-indole **3i** (0.5 mmol) was added in one portion and the reaction mixture was stirred for additional 3 h under the same condition, with the reaction progress being monitored by TLC. After the completion of the reaction, saturated aq. sodium thiosulfate (5 mL) was added. The organic layer was separated

and the aqueous phase was extracted with CH<sub>2</sub>Cl<sub>2</sub> (3 x 10 mL). The combined extract was dried with MgSO<sub>4</sub> and evaporated to dryness. The residue was purified by column chromatography (20% EtOAc/PE) to give pure **6** as a yellow powder (109 mg, 70%), mp: 162–163 °C. <sup>1</sup>H NMR (400 MHz, CDCl<sub>3</sub>) δ 8.20 (d, *J* = 8.8 Hz, 1H), 7.87 (d, *J* = 8.4 Hz, 2H), 7.54 (dd, *J* = 11.4, 4.3 Hz, 2H), 7.35 (t, *J* = 7.3 Hz, 1H), 7.25 (d, *J* = 7.3 Hz, 2H), 2.43 (s, 3H), 2.36 (s, 3H). <sup>13</sup>C NMR (101 MHz, CDCl<sub>3</sub>) δ 145.9, 136.7, 134.5, 134.5, 130.2, 128.8, 128.7, 127.1, 124.4, 120.7, 114.8, 112.2, 107.1, 21.7, 10.1. HRMS (ESI) calcd for C<sub>17</sub>H<sub>14</sub>N<sub>2</sub>NaO<sub>2</sub>S<sup>+</sup> [M + Na<sup>+</sup>] 333.0668, found 333.0662.

#### Ethyl (*E*)-3-(3-methyl-1-tosyl-1*H*-indol-2-yl)acrylate (**7**)<sup>4</sup>

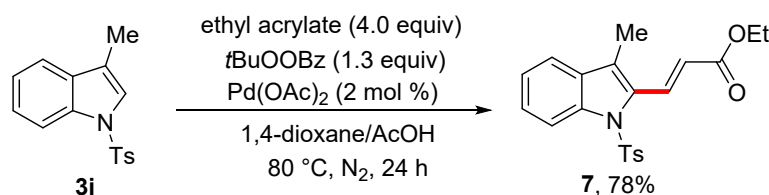

To a solution of indole **3i** (1.0 mmol) in 1, 4-dioxane/AcOH (3:1/v:v, 4.0 mL) was added Pd(OAc)<sub>2</sub> (0.02 mmol), *tert*-butyl benzoyl peroxide (1.3 mmol) and ethyl acrylate (4.0 mmol). The resulting mixture was heated to 80 °C under N<sub>2</sub> atmosphere for 24 h before it was cooled to room temperature, diluted with ethyl acetate, and filtered through a pad of celite. The filtrate was washed with saturated aq. NaHCO<sub>3</sub>, dried over anhydrous Na<sub>2</sub>SO<sub>4</sub>, and concentrated *in vacuo* to give crude oil, which was purified by column chromatography (5% EtOAc/PE) to afford **7** (299 mg, 78%) as a white solid, mp: 111–112 °C. <sup>1</sup>H NMR (400 MHz, CDCl<sub>3</sub>) δ 8.24 (dd, *J* = 14.1, 12.8 Hz, 2H), 7.56 (d, *J* = 8.3 Hz, 2H), 7.43 (dd, *J* = 7.4, 3.6 Hz, 1H), 7.41 – 7.33 (m, 1H), 7.29 – 7.24 (m, 1H), 7.11 (t, *J* = 6.2 Hz, 2H), 6.12 (d, *J* = 16.1 Hz, 1H), 4.33 (q, *J* = 7.1 Hz, 2H), 2.30 (d, *J* = 3.5 Hz, 6H), 1.39 (t, *J* = 7.1 Hz, 3H). <sup>13</sup>C NMR (101 MHz, CDCl<sub>3</sub>) δ 166.4, 144.9, 137.1, 134.9, 134.6, 131.8, 131.4, 129.6, 126.7, 126.5, 124.1, 123.3, 122.5, 119.8, 115.4, 60.8, 21.6, 14.4, 10.9. HRMS (ESI) calcd for C<sub>21</sub>H<sub>21</sub>NNaO<sub>4</sub>S<sup>+</sup> [M + Na<sup>+</sup>] 406.1083, found 406.1087.

#### 3-Methyl-1*H*-indole (**8**)

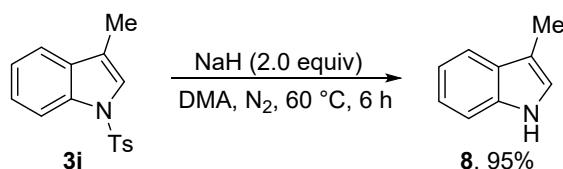

To a suspension solution of NaH (2.0 mmol, 2.0 equiv) in dry DMA (5.0 mL) under N<sub>2</sub> was added dropwise a solution of **3i** (1.0 mmol, 1.0 equiv) in dry DMA (3.0 mL) by syringe. Then the mixture was heated at 60 °C until TLC showed the

completion of the reaction. A saturated aq. solution of  $\text{NH}_4\text{Cl}$  (10 mL) was added to quench the reaction and extracted with EtOAc (20 mL) for one time. The organic layer was washed with water for three times, and the combined aqueous layers were extracted with EtOAc (20 mL) for one time. The combined organic layers were washed with brine and dried over sodium sulfate and concentrated *in vacuo*. The residue was purified by column chromatography (5% EtOAc/PE) to give 3-methylindole **8** as a white solid (125 mg, 95%), mp: 93–94 °C.  $^1\text{H}$  NMR (400 MHz,  $\text{CDCl}_3$ )  $\delta$  7.83 (s, 1H), 7.63 (dd,  $J = 7.9, 0.7$  Hz, 1H), 7.36 (d,  $J = 8.0$  Hz, 1H), 7.23 (dd,  $J = 11.0, 4.1$  Hz, 1H), 7.16 (ddd,  $J = 3.1, 2.7, 1.1$  Hz, 1H), 6.98 (s, 1H), 2.38 (s, 3H).  $^{13}\text{C}$  NMR (101 MHz,  $\text{CDCl}_3$ )  $\delta$  136.3, 128.3, 121.9, 121.6, 119.2, 118.9, 111.8, 111.0, 9.7. HRMS (ESI) calcd for  $\text{C}_9\text{H}_9\text{NNa}^+$  [ $\text{M} + \text{Na}^+$ ] 154.0627, found 154.0623.

### 3-Methyl-2-(trifluoromethyl)-1H-indole (**9**)<sup>5</sup>

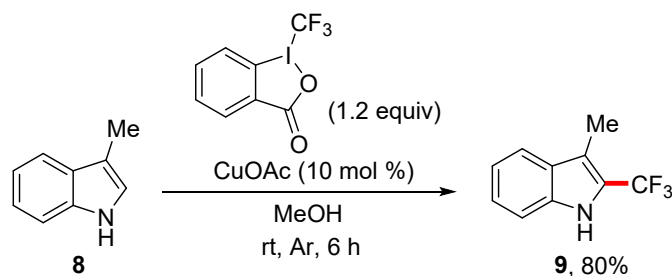

To a solution of CuOAc (0.05 mmol) and Togni's reagent (0.6 mmol) in degassed MeOH (5.0 ml) was added 3-methylindole **8** (0.5 mmol) under an argon atmosphere at room temperature. The reaction mixture was stirred for 6 h, then diluted with  $\text{Et}_2\text{O}$ . To the mixture was added saturated aq.  $\text{NaHCO}_3$  solution (5.0 mL), and the whole mixture was extracted with  $\text{Et}_2\text{O}$  (10 mL  $\times$  3). The combined organic layer was dried over  $\text{Na}_2\text{SO}_4$ . The solid was filtered off and the filtrate was evaporated *in vacuo*. The crude residue was purified on silica gel (10% EtOAc/PE) to give trifluoromethylated compound **9** as a colorless solid (80 mg, 80%), mp: 73–74°C.  $^1\text{H}$  NMR (400 MHz,  $\text{CDCl}_3$ )  $\delta$  8.16 (brs, 1H), 7.65 (d,  $J = 8.0$  Hz, 1H), 7.39 (d,  $J = 8.2$  Hz, 1H), 7.33 (t,  $J = 7.6$  Hz, 1H), 7.20 (t,  $J = 7.5$  Hz, 1H), 2.45 (s, 3H).  $^{19}\text{F}$  NMR (376 MHz,  $\text{CDCl}_3$ )  $\delta$  -58.6.  $^{13}\text{C}$  NMR (101 MHz,  $\text{CDCl}_3$ )  $\delta$  135.2, 128.1, 124.8, 122.1 (q,  $J_{\text{C-F}} = 267.0$  Hz), 121.5 (q,  $J_{\text{C-F}} = 36.7$  Hz), 120.4, 120.1, 114.1 (q,  $J_{\text{C-F}} = 2.9$  Hz), 111.6, 8.35. HRMS (ESI) calcd for  $\text{C}_{10}\text{H}_8\text{F}_3\text{Na}^+$  [ $\text{M} + \text{Na}^+$ ] 222.0501, found 222.0506.

### 3-Methyl-2-(perfluorobutyl)-1H-indole (**10**)<sup>6</sup>

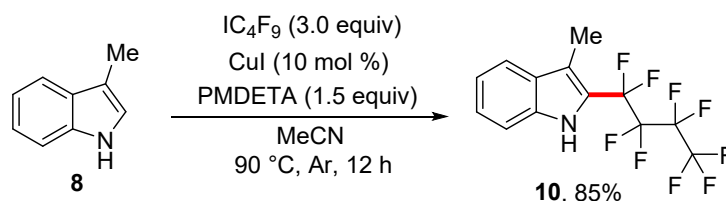

To a 25 mL of Schlenk tube was added CuI (0.1 mmol, 10 mol %) under air and then evacuated and backfilled with Ar (3 times). Acetonitrile (2 mL), PMDETA (1.5 mmol, 1.5 equiv), 3-methylindole **8** (1 mmol, 1.0 equiv) and perfluoroalkyl iodide (3.0 mmol, 3.0 equiv) were added subsequently. The reaction mixture was heated to 80 °C. After stirring for 12 h, the reaction was cooled to room temperature. Then the reaction mixture was diluted with EtOAc and filtered with a pad of Celite. The filtrate was concentrated, and the residue was purified with silica gel chromatography (10% EtOAc/PE) to give product **10** (148 mg, 85%) as a white solid, mp: 75–76 °C. <sup>1</sup>H NMR (400 MHz, CDCl<sub>3</sub>) δ 8.14 (s, 1H), 7.69 (d, *J* = 8.0 Hz, 1H), 7.43 – 7.34 (m, 2H), 7.24 (dt, *J* = 8.0, 3.4 Hz, 1H), 2.48 (s, 3H). <sup>19</sup>F NMR (376 MHz, CDCl<sub>3</sub>) δ -78.61 – -83.99 (m, 3F), -107.20 – -110.56 (m, 2F), -123.05 (ddd, *J* = 20.1, 10.0, 2.9 Hz, 2F), -124.64 – -127.77 (m, 2F). <sup>13</sup>C NMR (101 MHz, CDCl<sub>3</sub>) δ 135.9, 128.4, 125.0, 120.4, 120.1, 119.4 (t, *J* = 28.4 Hz), 117.2 (t, *J* = 32.5 Hz), 116.8 (t, *J* = 3.2 Hz), 116.1 (t, *J* = 33.4 Hz), 114.7 (t, *J* = 32.7 Hz), 111.5, 8.6. HRMS (ESI) calcd for C<sub>13</sub>H<sub>8</sub>F<sub>9</sub>NNa<sup>+</sup> [*M* + Na<sup>+</sup>] 372.0405, found 372.0402.

#### (10-Methyl-6-phenylpyrido[1,2-*a*]indol-7-yl)(phenyl)methanone (**11**)<sup>7</sup>

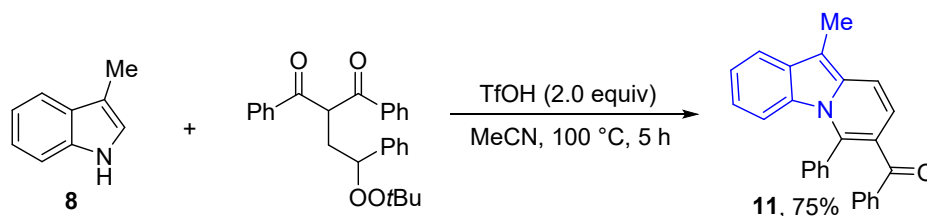

To a stirred solution of 3-methylindole **8** (1.5 mmol) and 4-oxo peroxide (0.5 mmol) in anhydrous MeCN (10 mL) was added TfOH (90.0 μL 1.0 mmol). The reaction tube was sealed and stirred at 100 °C for 5 h. After the mixture was cooled to room temperature, EtOAc (30.0 mL) was added and the mixture was washed with aq. NaHCO<sub>3</sub> (10 mL × 3). The organic layer was then evaporated under vacuum. The residue was purified by flash column chromatography on silica gel (10% EtOAc/PE) to give the pure product **11** (135 mg, 75%) as brown oil. <sup>1</sup>H NMR (400 MHz, CDCl<sub>3</sub>) δ 7.75 (d, *J* = 8.1 Hz, 1H), 7.69 (d, *J* = 8.4 Hz, 2H), 7.50 – 7.44 (m, 3H), 7.44 – 7.40 (m, 4H), 7.37 – 7.27 (m, 3H), 6.98 (d, *J* = 9.4 Hz, 1H), 6.89 – 6.81 (m, 1H), 6.17 (d, *J* = 8.7 Hz, 1H), 2.58 (s, 3H). <sup>13</sup>C NMR (101 MHz, CDCl<sub>3</sub>) δ 196.0, 141.4, 138.6, 134.3,

133.7, 132.6, 131.1, 130.8, 130.1, 129.7, 129.7, 129.0, 128.2, 122.6, 121.0, 120.6, 119.9, 118.4, 115.9, 115.3, 8.2. HRMS (ESI) calcd for  $C_{26}H_{19}NNaO^+$  [ $M + Na^+$ ] 384.1359, found 384.1356.

### 9-Methyl-1,3-diphenyl-9H-pyrrolo[1,2-*a*]indole-2-carbonitrile (**12**)<sup>8</sup>

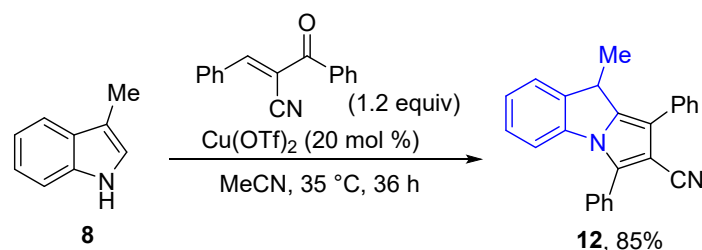

To a 5.0 mL vial were successively added 3-methylindole **8** (0.5 mmol), benzaldehyde-derived oxodiene (0.6 mmol),  $Cu(OTf)_2$  (0.1 mmol), and MeCN (2.0 mL). The resulting mixture was stirred at 35 °C until the full consumption of substrate **8** monitored by TLC. Then the precipitate was generated, and only a simple filtration was needed to purify product **12** (147 mg, 85%) as a white solid, mp: 173–174 °C.  $^1H$  NMR (400 MHz,  $CDCl_3$ )  $\delta$  7.73 (d,  $J = 8.1$  Hz, 2H), 7.69 (d,  $J = 6.5$  Hz, 2H), 7.61 – 7.52 (m, 3H), 7.48 (t,  $J = 7.7$  Hz, 2H), 7.43 (d,  $J = 7.3$  Hz, 1H), 7.35 (t,  $J = 7.4$  Hz, 1H), 7.20 (td,  $J = 7.4, 1.2$  Hz, 1H), 7.15 (td,  $J = 7.7, 1.0$  Hz, 1H), 7.04 (d,  $J = 7.9$  Hz, 1H), 4.47 (q,  $J = 7.2$  Hz, 1H), 1.46 (d,  $J = 7.2$  Hz, 3H).  $^{13}C$  NMR (101 MHz,  $CDCl_3$ )  $\delta$  141.2, 139.1, 138.4, 135.1, 132.3, 129.8, 129.6, 129.0, 128.9, 128.9, 127.6, 127.5, 127.2, 125.3, 125.0, 120.4, 117.1, 112.7, 96.1, 36.0, 16.9. HRMS (ESI) calcd for  $C_{25}H_{18}N_2Na^+$  [ $M + Na^+$ ] 369.1362, found 369.1366.

### 1,9'-Dimethyl-2-oxo-3'-phenylspiro[indoline-3,1'-pyrrolo[1,2-*a*]indole]-2'-carbonitrile (**13**)<sup>8</sup>

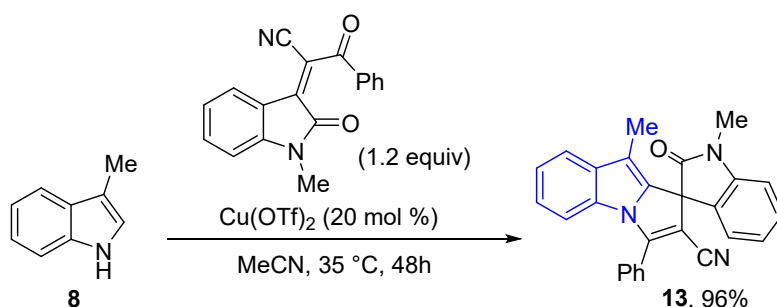

To a 5.0 mL vial were successively added 3-methylindole **8** (0.5 mmol), isatin-derived  $\alpha,\beta$ -unsaturated ketone (0.6 mmol),  $Cu(OTf)_2$  (0.1 mmol), and 2.0 mL of MeCN. The resulting mixture was stirred at 35 °C until almost full consumption of 3-methylindole **8** as monitored by TLC, and the precipitate was generated, and only a simple filtration was needed to purify the product **13** (193 mg, 96%) as a white solid,

mp: 212–213 °C. <sup>1</sup>H NMR (600 MHz, CDCl<sub>3</sub>) δ 7.86 (d, *J* = 6.7 Hz, 2H), 7.68 – 7.61 (m, 3H), 7.47 (d, *J* = 7.8 Hz, 1H), 7.45 – 7.38 (m, 1H), 7.19 – 7.15 (m, 1H), 7.14 – 7.07 (m, 4H), 7.01 (d, *J* = 7.9 Hz, 1H), 3.40 (s, 3H), 1.86 (s, 3H). <sup>13</sup>C NMR (151 MHz, CDCl<sub>3</sub>) δ 172.3, 156.0, 144.4, 138.0, 134.8, 131.8, 131.7, 130.1, 129.2, 129.1, 127.0, 125.7, 124.4, 123.7, 123.5, 121.9, 119.8, 111.8, 111.3, 108.9, 96.2, 57.6, 27.2, 7.8. HRMS (ESI) calcd for C<sub>27</sub>H<sub>19</sub>N<sub>3</sub>NaO<sup>+</sup> [M + Na<sup>+</sup>] 424.1420, found 424.1425.

### III. References:

- 1 H.-D. Xia, Y.-D. Zhang, Y.-H. Wang and C. Zhang. *Org. Lett.*, 2018, **20**, 4052-4056.
- 2 X. Li, B. Zhang, J. Zhang, X. Wang, D. Zhang, Y. Du and K. Zhao. *Chin. J. Chem.*, 2021, **39**, 1211-1224.
- 3 T. Dohi, K. Morimoto, Y. Kiyono, H. Tohma and Y. Kita. *Org. Lett.*, 2005, **7**, 537-540.
- 4 Y. Liu, W. Xu and X. Wang. *Org. Lett.*, 2010, **12**, 1448-1451.
- 5 R. Shimizu, H. Egami, T. Nagi, J. Chae, Y. Hamashima and M. Sodeoka. *Tetrahedron Lett.*, 2010, **51**, 5947-5949.
- 6 X. Wang, S. Zhao, J. Liu, D. Zhu, M. Guo, X. Tang and G. Wang. *Org. Lett.*, 2017, **19**, 4187-4190.
- 7 X. Wang, C. Lou, L. Lv and Z. Li. *Org. Lett.*, 2021, **23**, 5978-5982.
- 8 Y.-S. Zhu, B.-B. Yuan, J.-M. Guo, S.-J. Jin, H.-H. Dong, Q.-L. Wang and Z.-W. Bu. *J. Org. Chem.*, 2017, **82**, 5669-5677.

#### IV. $^1\text{H}$ and $^{13}\text{C}$ NMR Spectra:

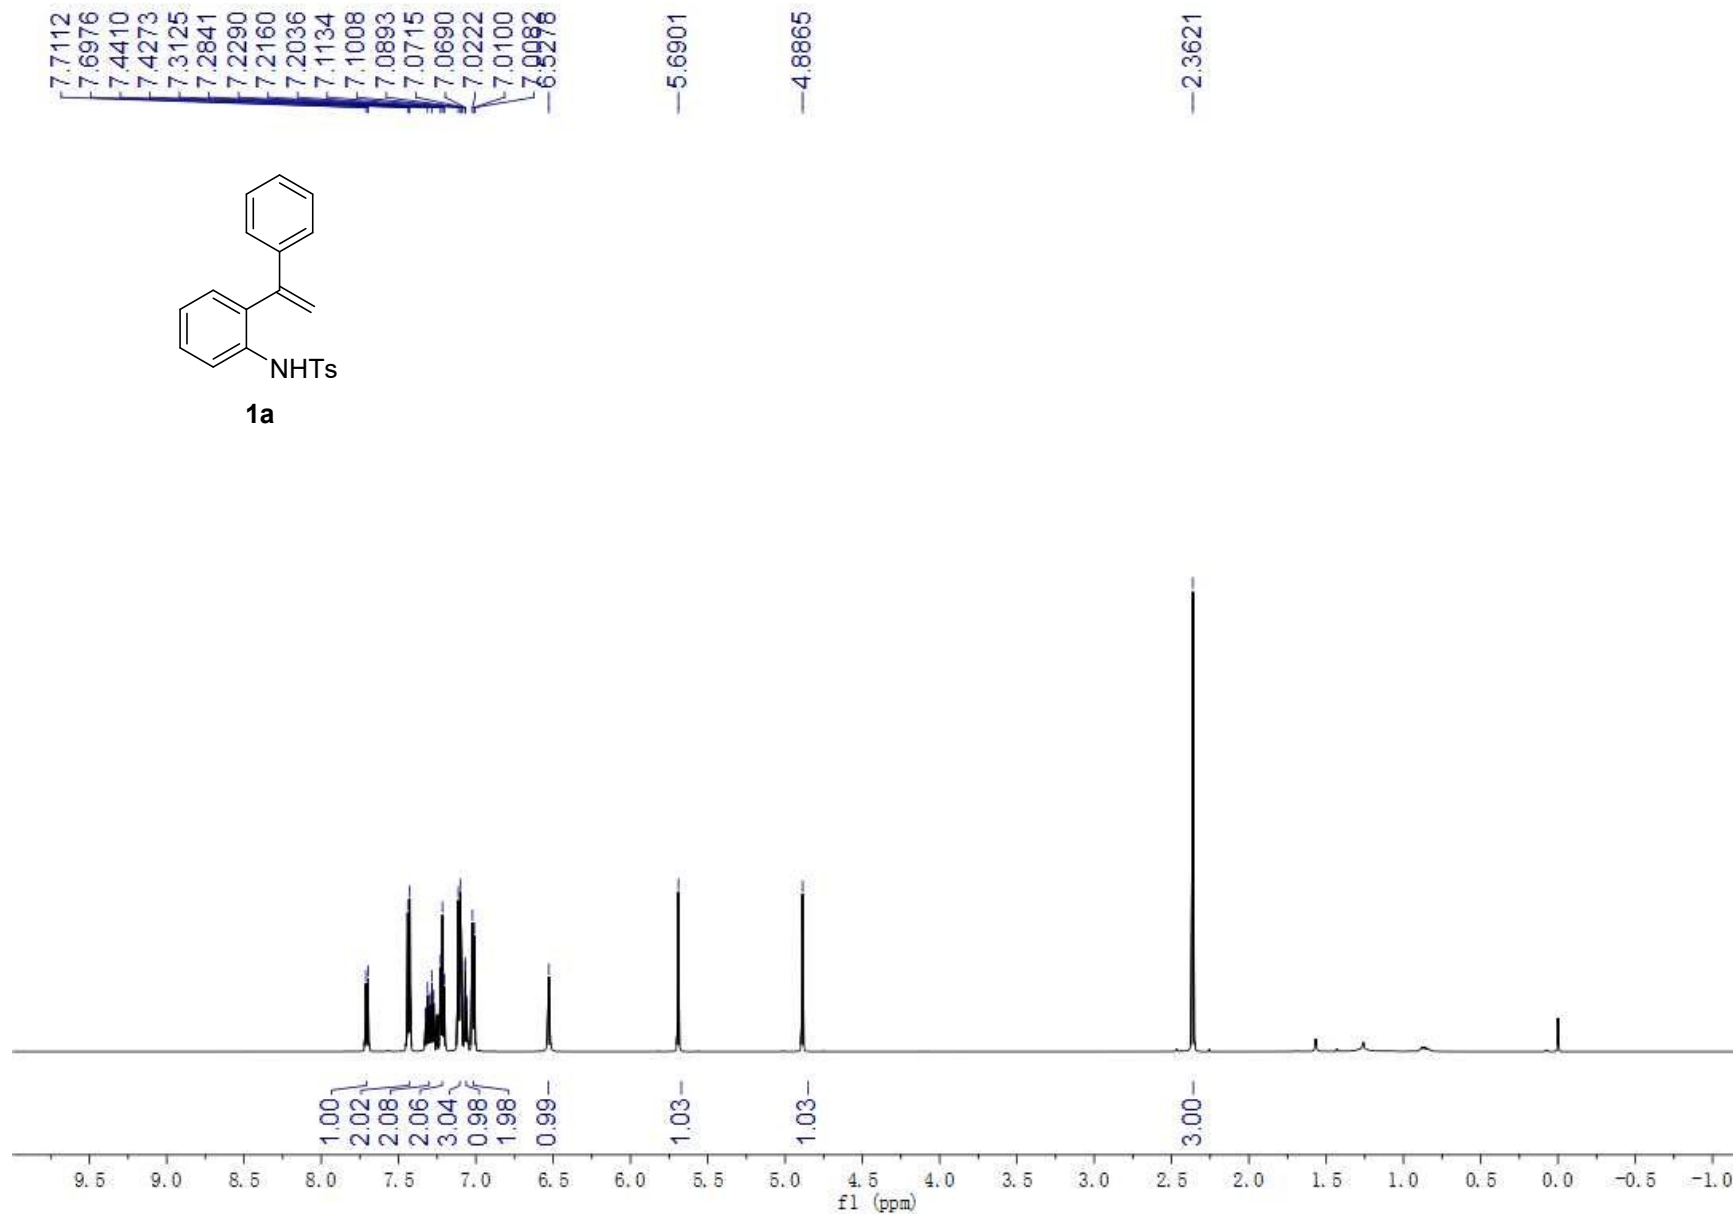



145.0261  
143.6845  
138.6725  
136.1208  
134.2703  
133.1036  
130.4944  
129.4673  
128.8608  
128.8044  
128.5565  
127.2650  
126.3950  
124.7380  
121.1165  
117.0985

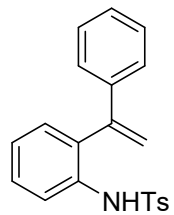

**1a**

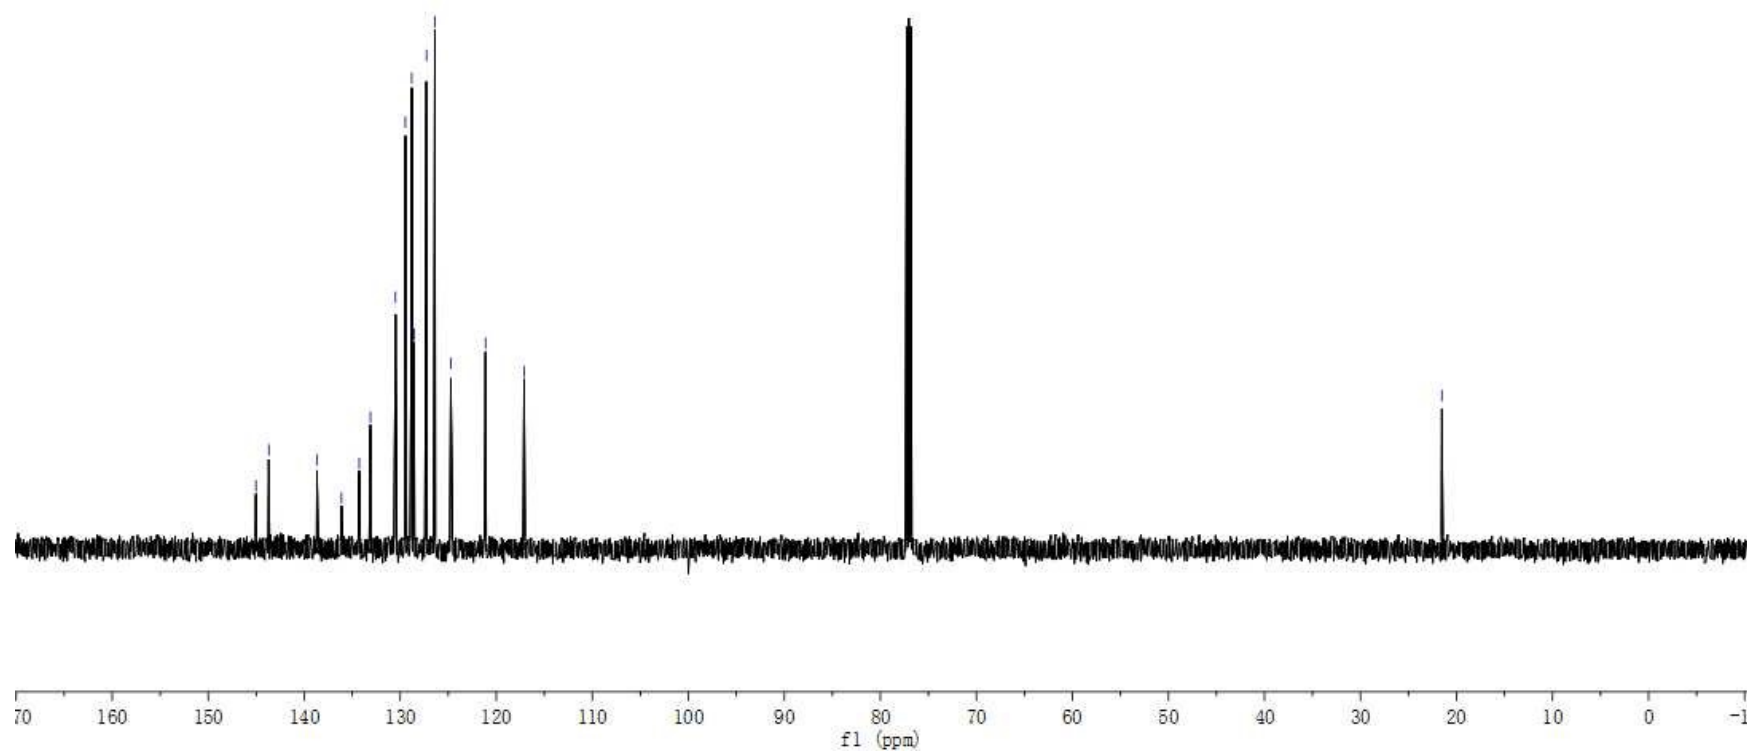

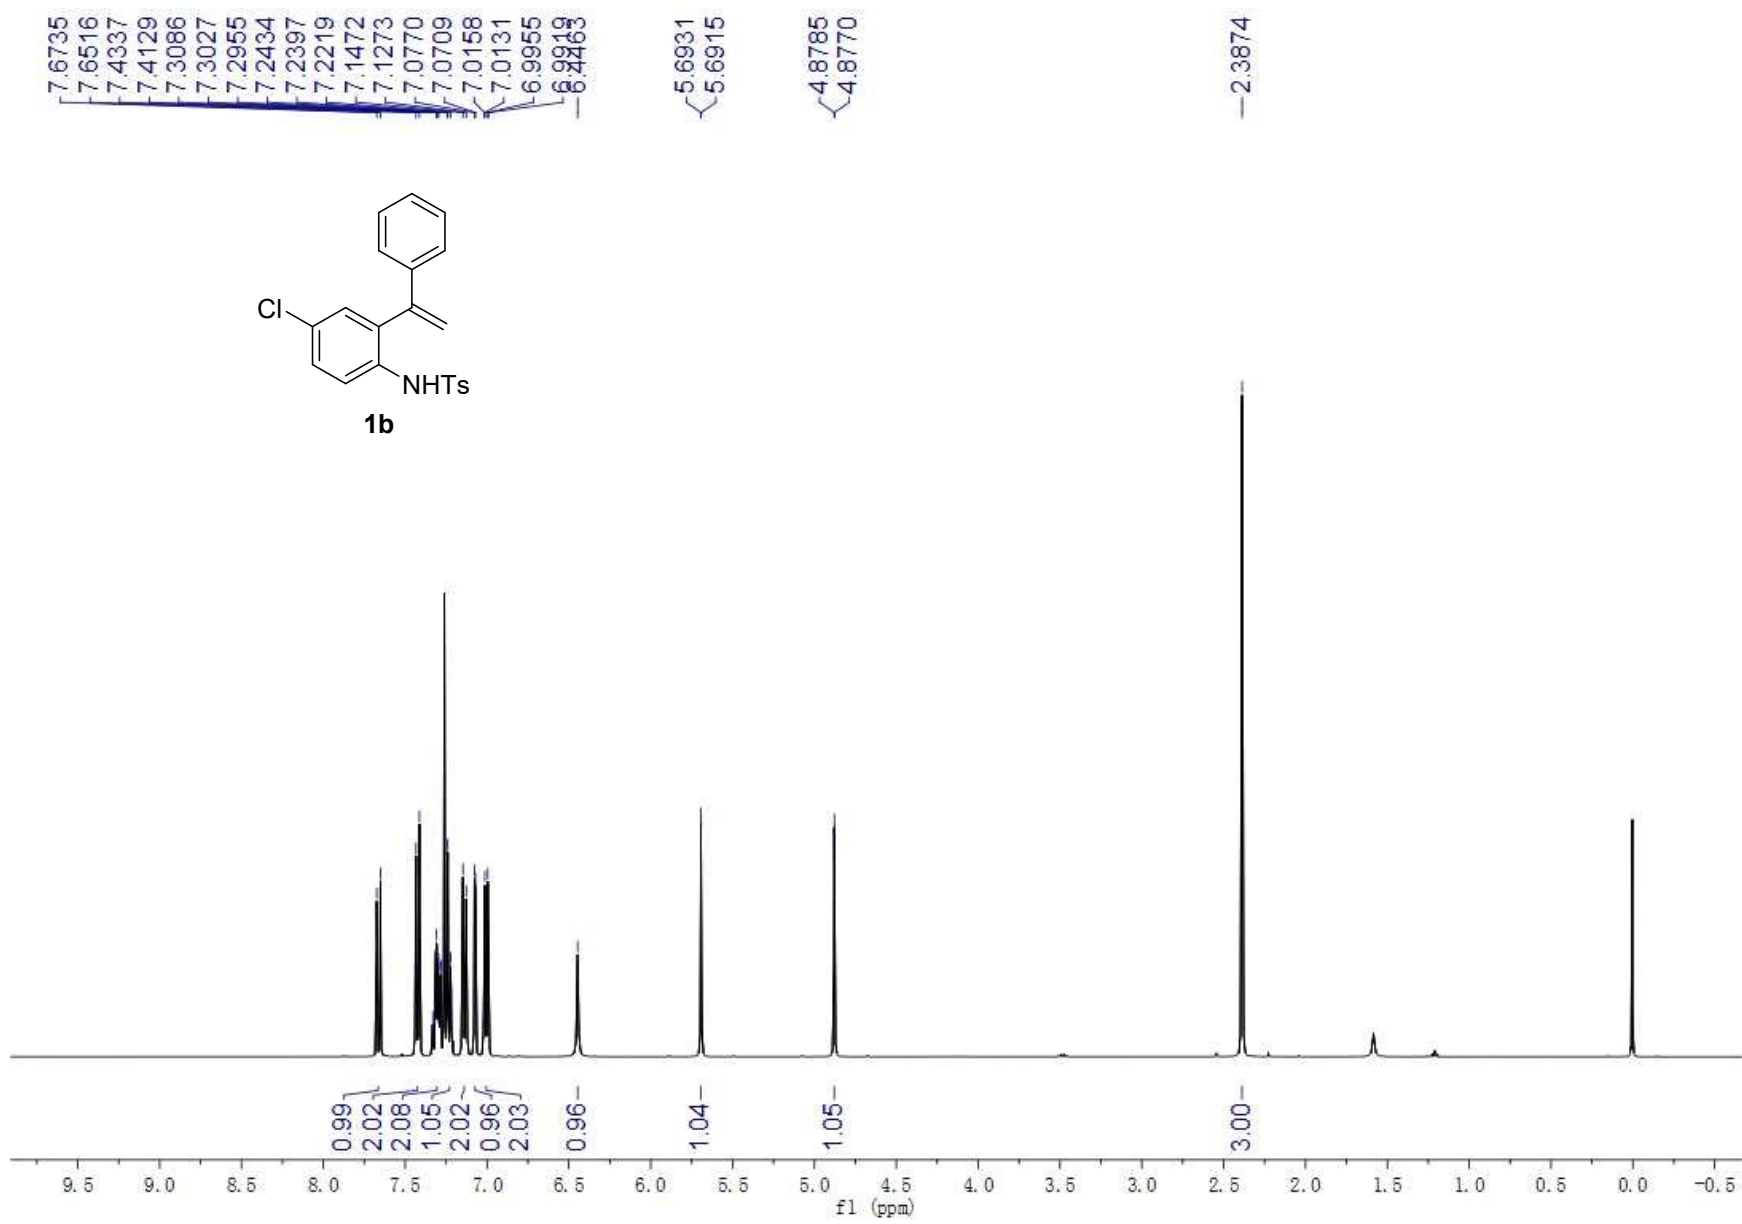

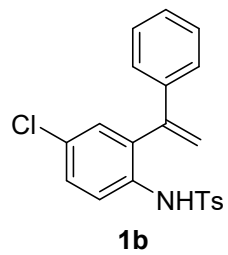

143.9877  
143.9614  
137.9422  
135.7672  
134.7749  
132.9480  
130.2433  
130.2177  
129.6013  
128.9678  
128.8866  
128.8518  
127.2419  
126.3129  
122.6632  
117.7597

-21.5712

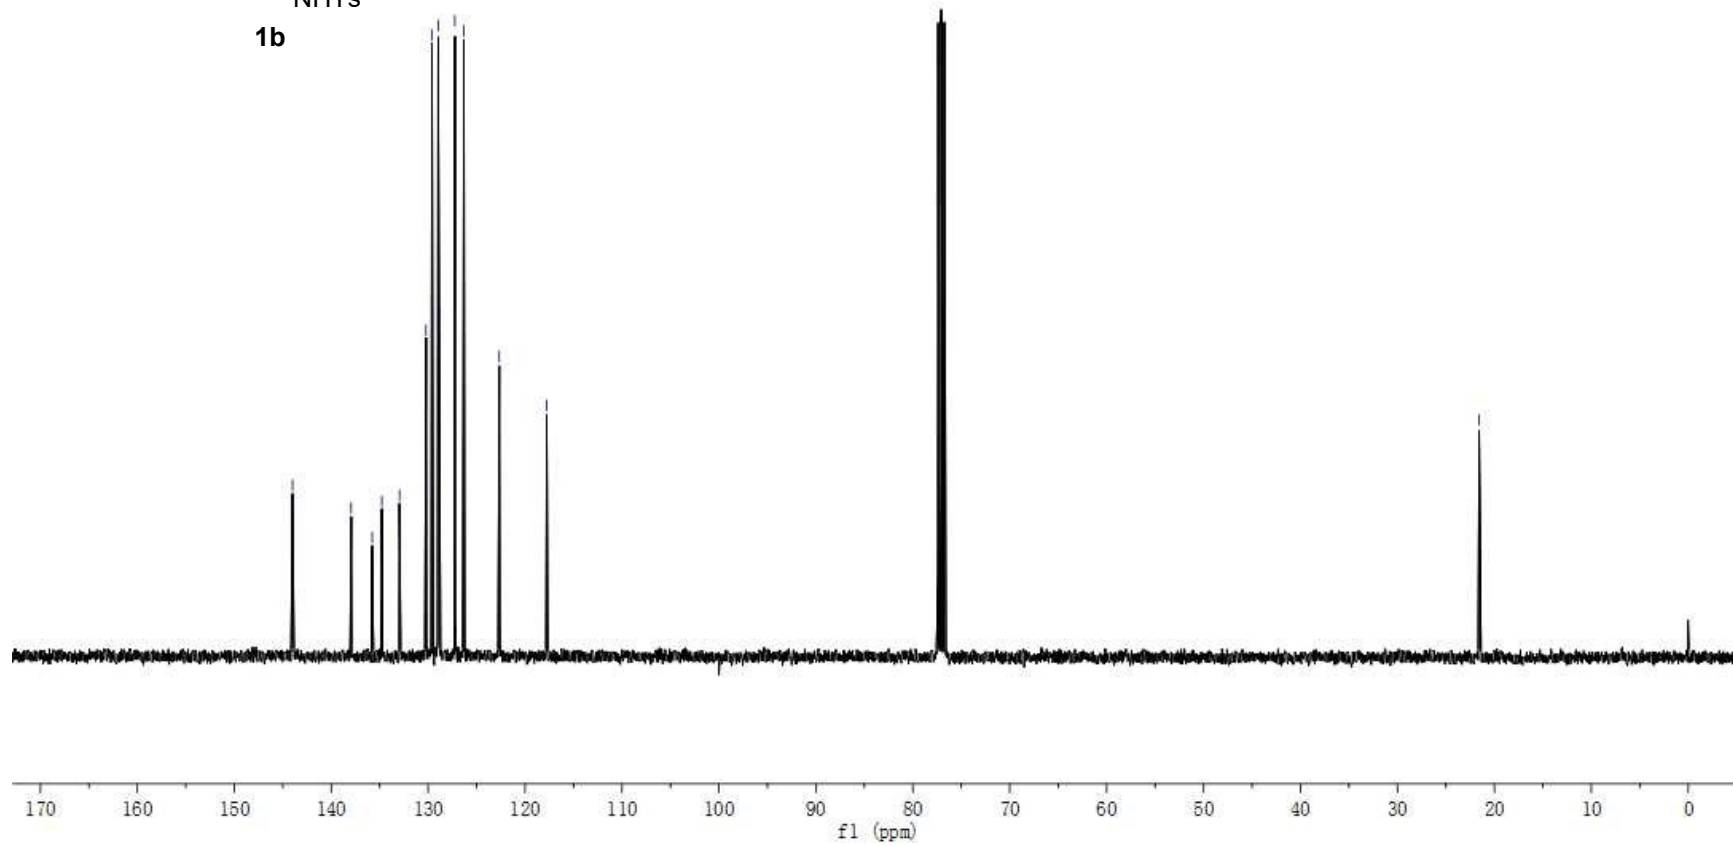

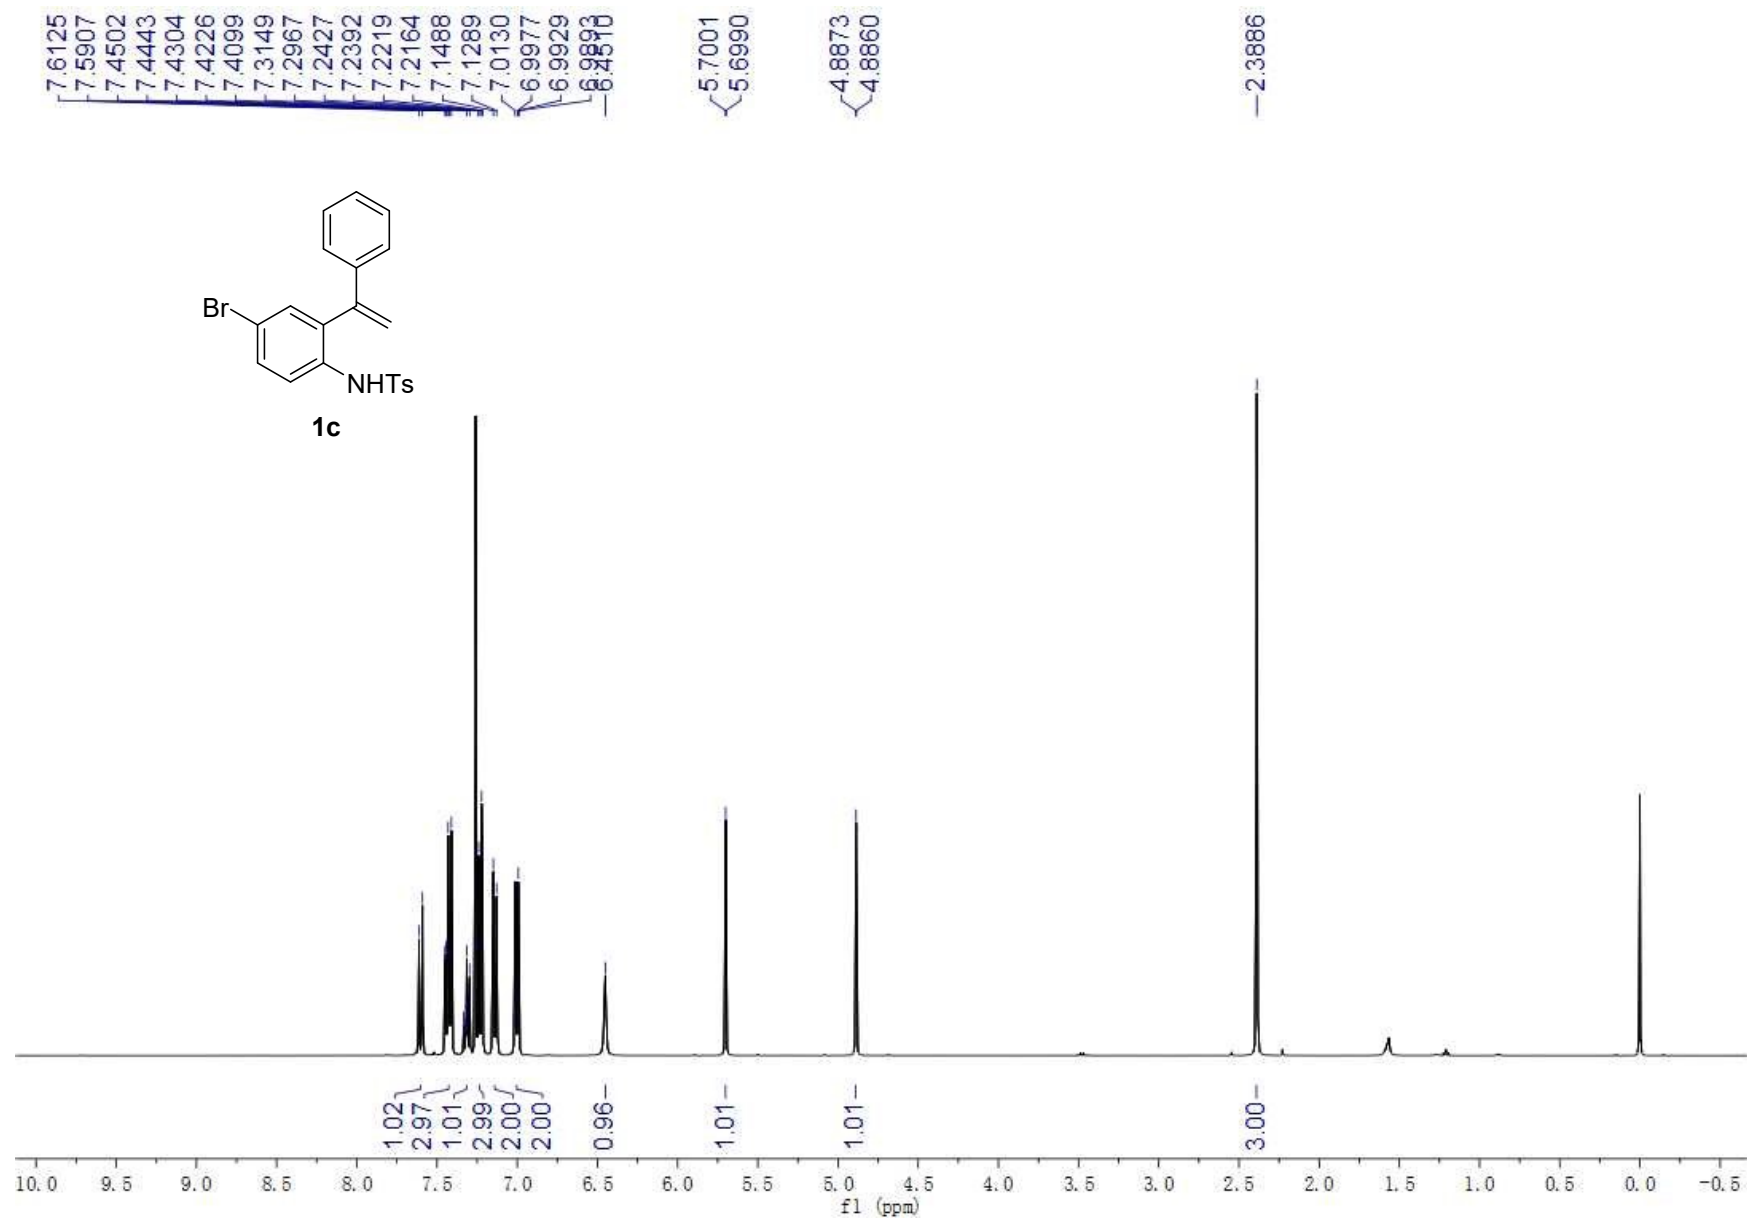

144.0287  
143.8245  
137.9134  
135.6924  
134.9637  
133.4805  
133.0482  
131.8361  
129.6263  
128.9776  
128.8698  
127.2421  
126.3142  
122.7587  
117.8910  
117.8504

-21.5961

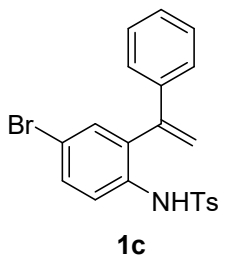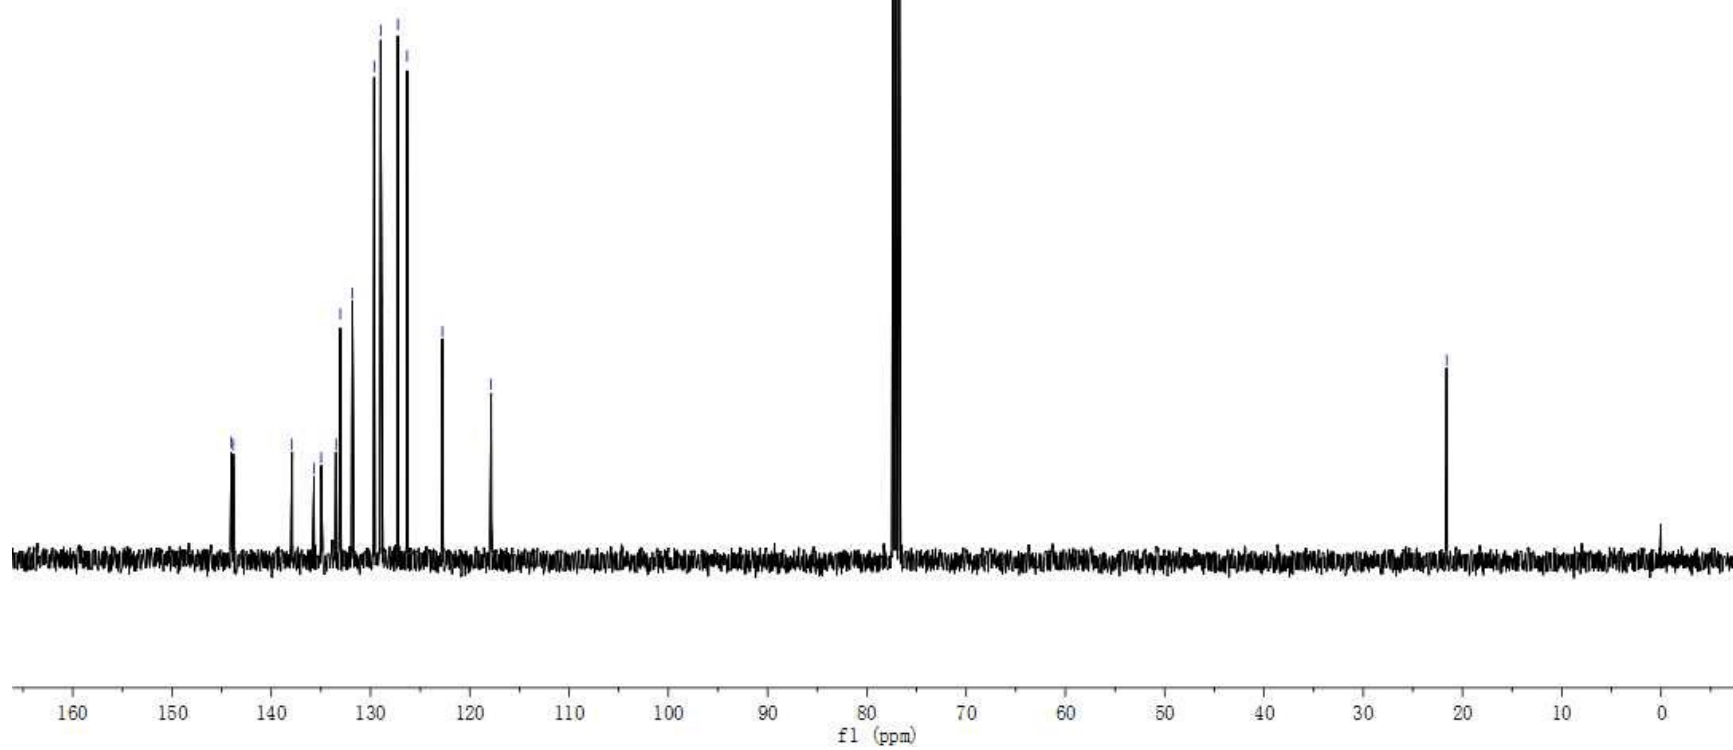

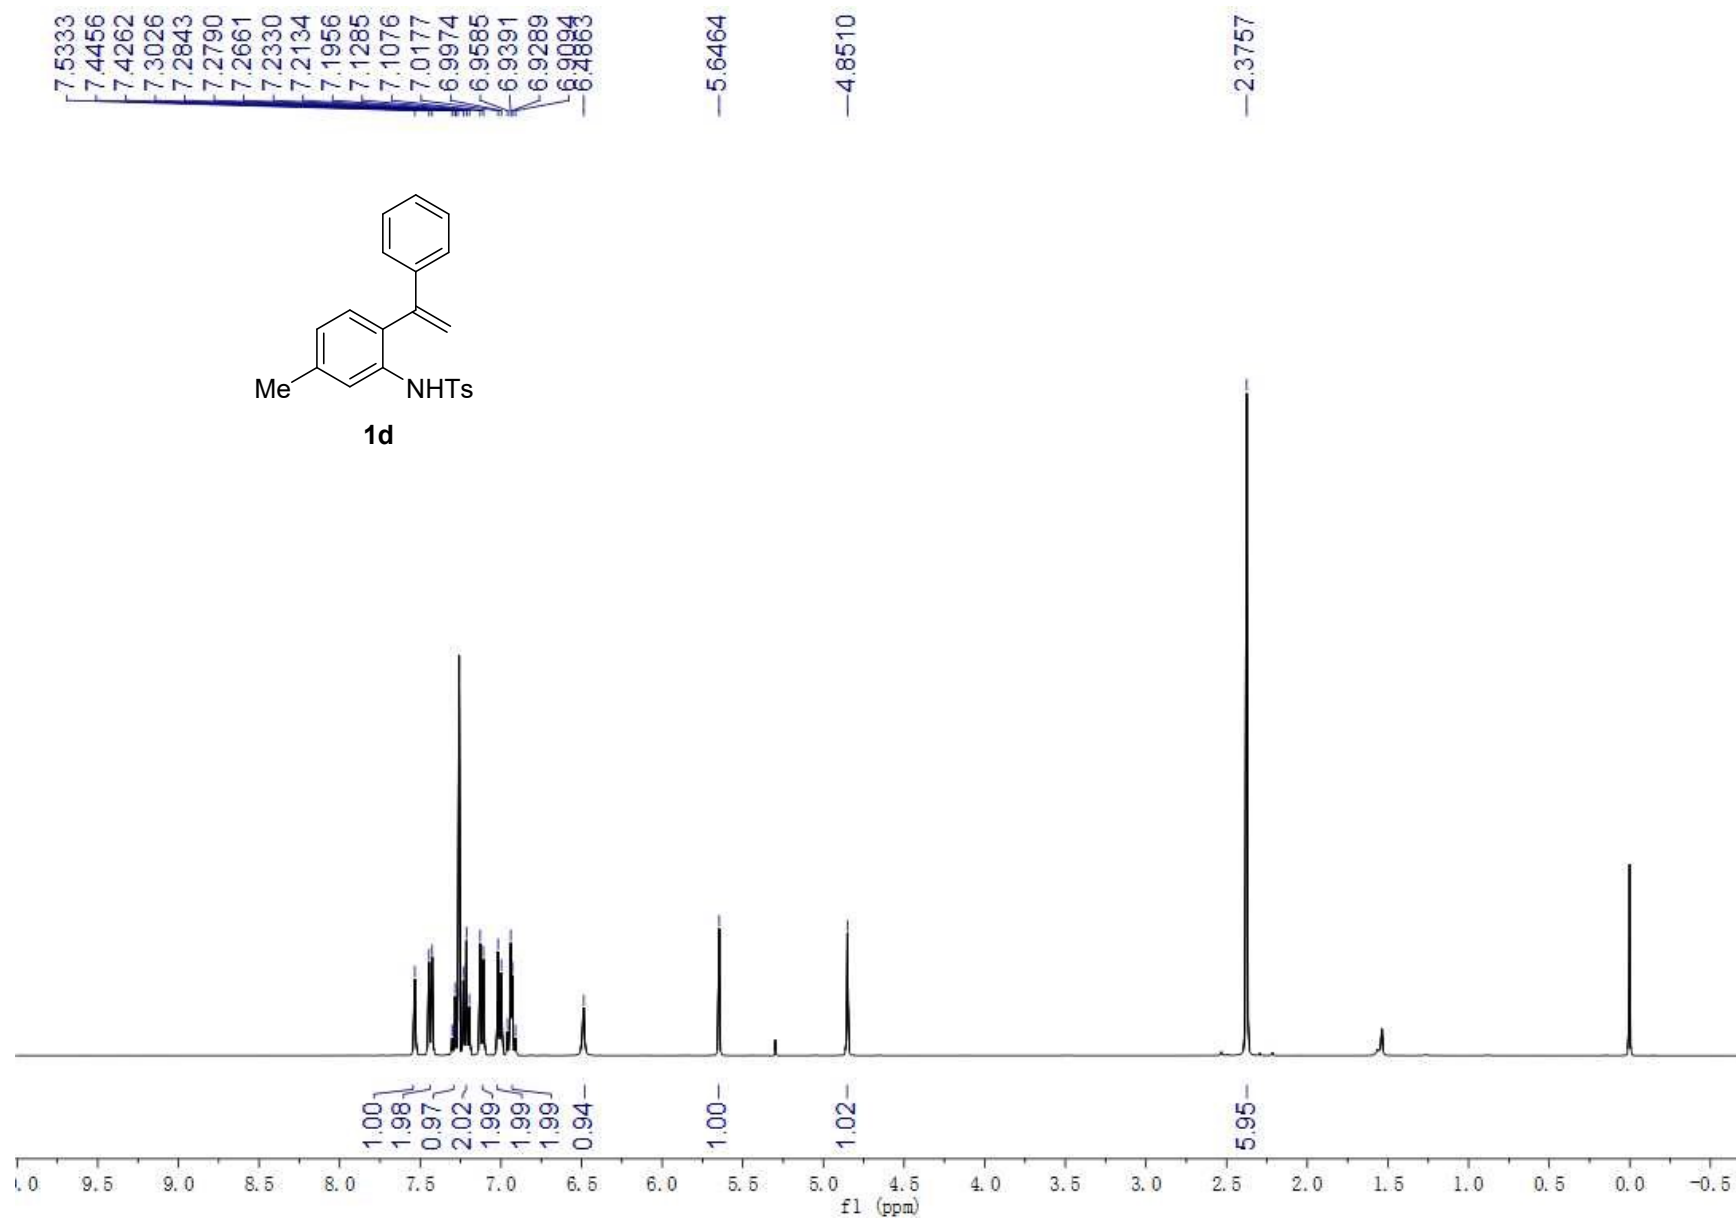

144.9756  
143.6580  
138.9781  
138.9095  
136.0629  
133.9828  
130.3390  
130.2812  
129.4615  
128.7628  
128.4900  
127.2579  
126.4266  
125.6361  
121.8469  
116.9122

21.5691  
21.4600

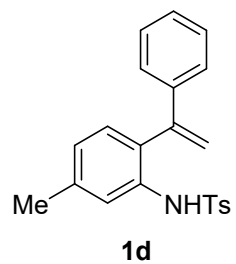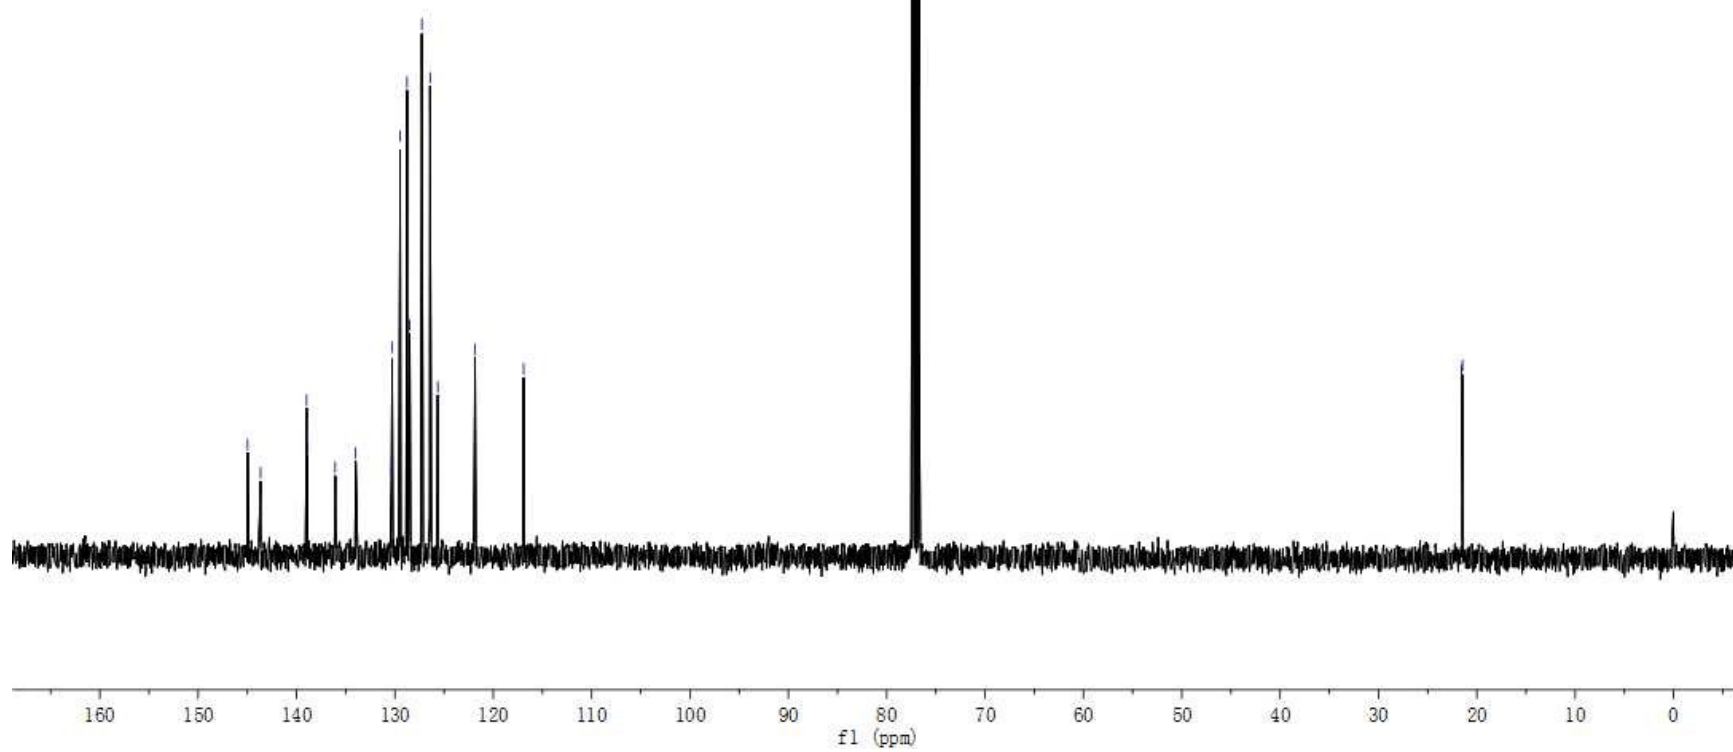

8.0019  
7.9888  
7.4561  
7.4354  
7.3273  
7.2630  
7.2469  
7.2435  
7.1515  
7.1312  
7.0140  
6.9964  
6.9828  
6.9632

4.9832

2.3817

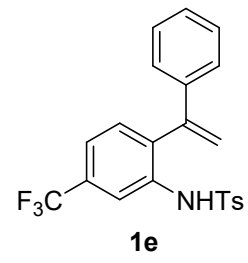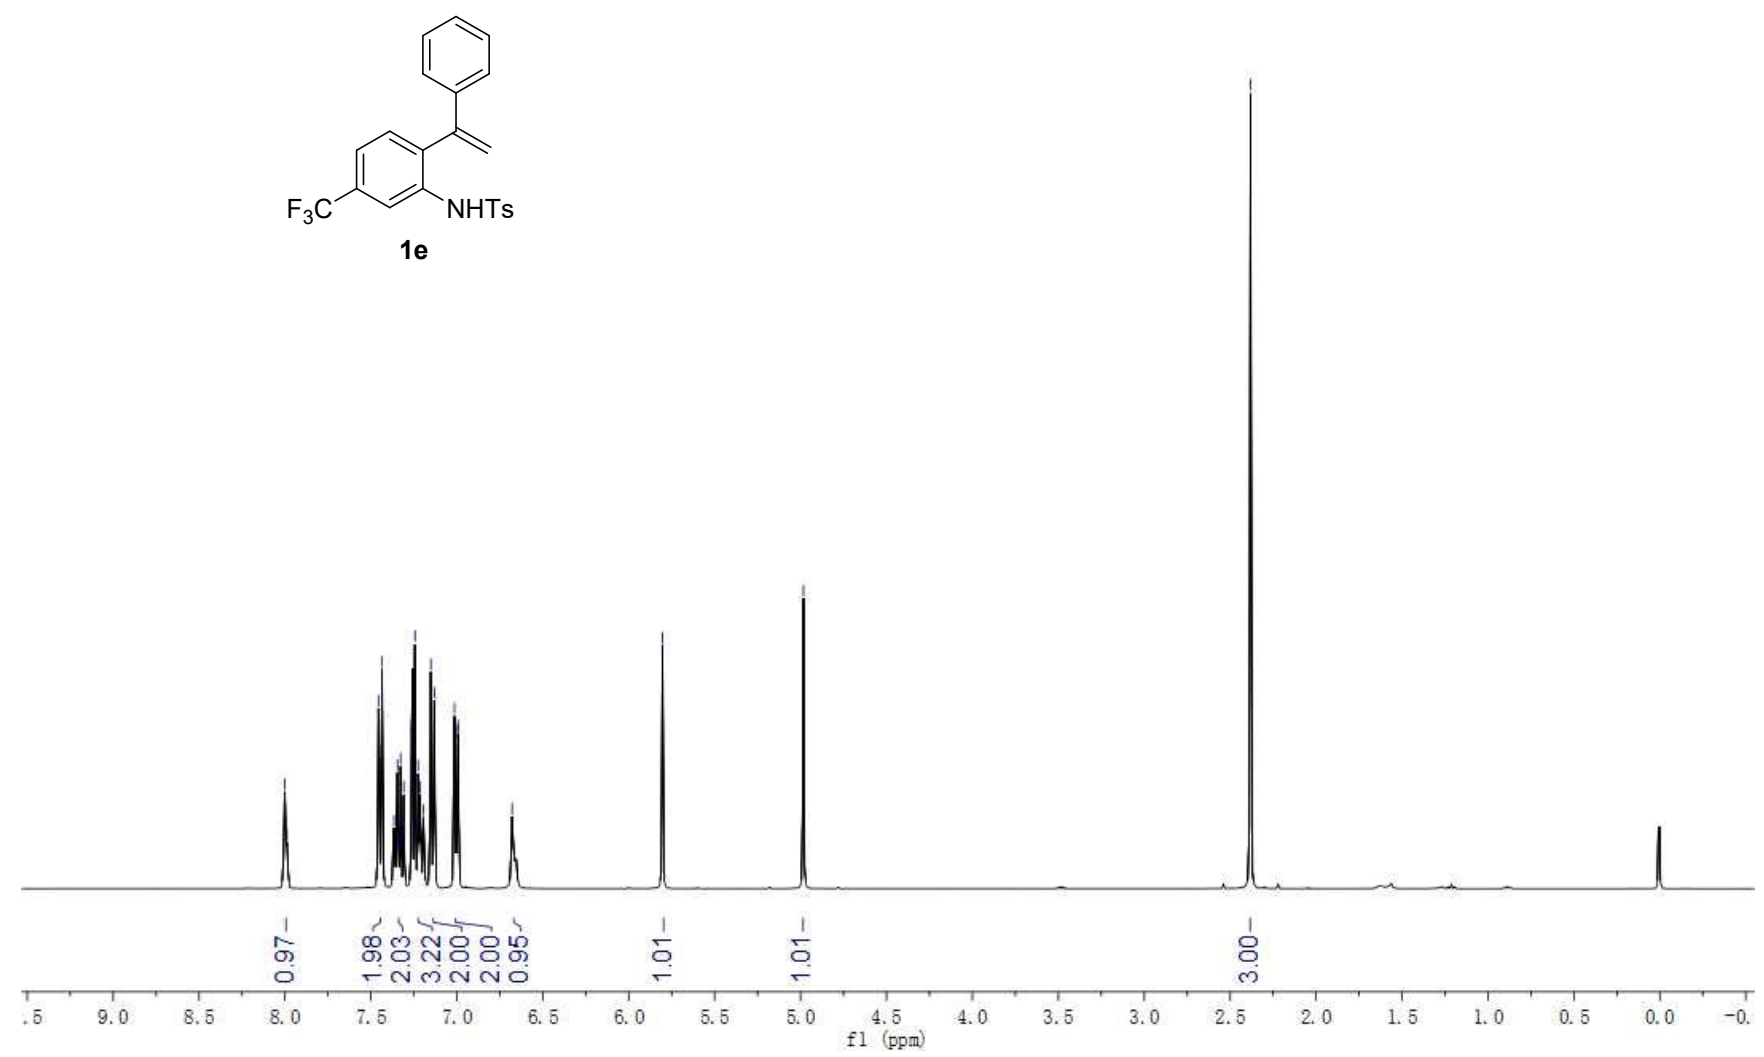



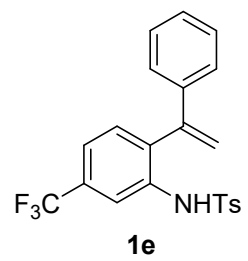

--62.7410

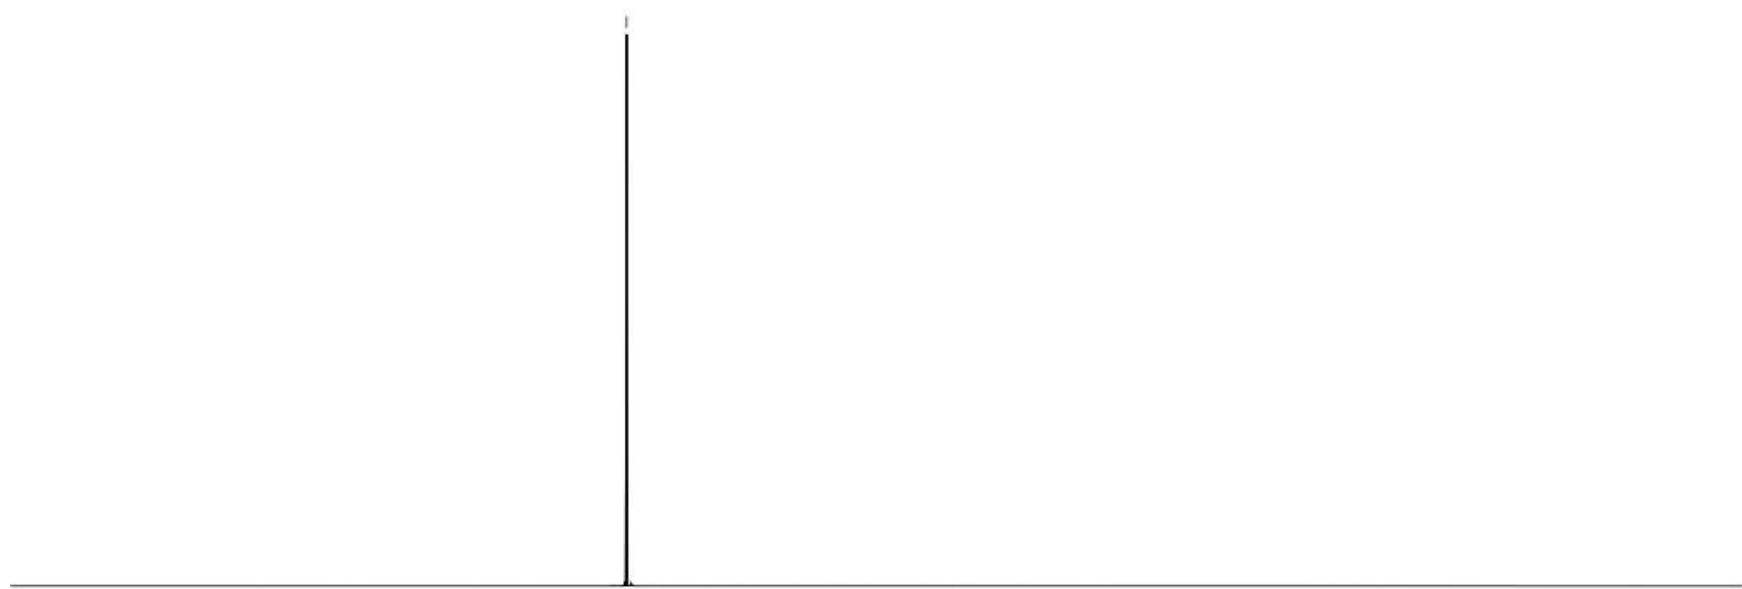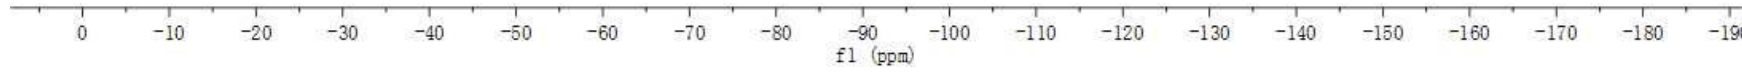

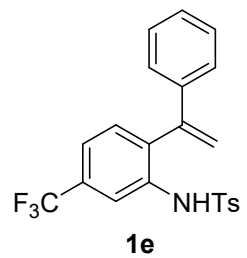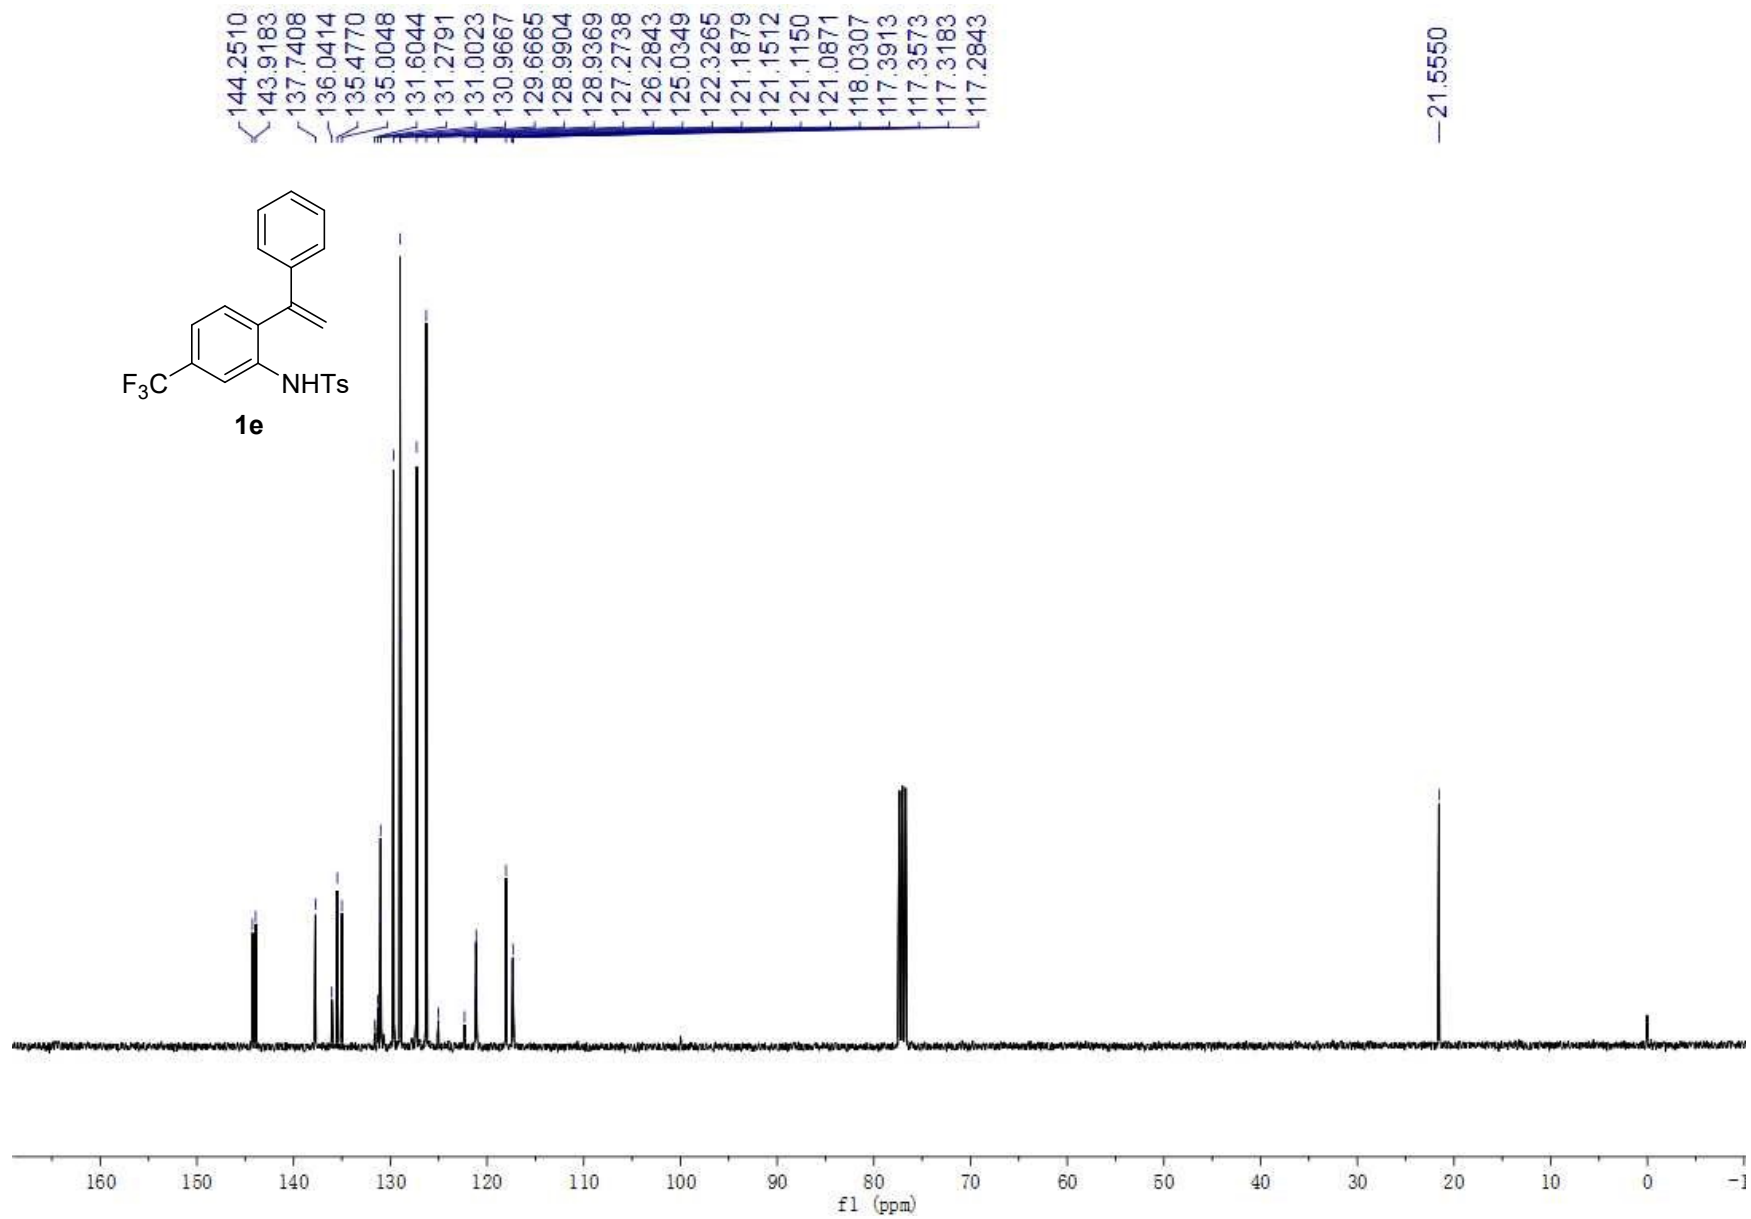

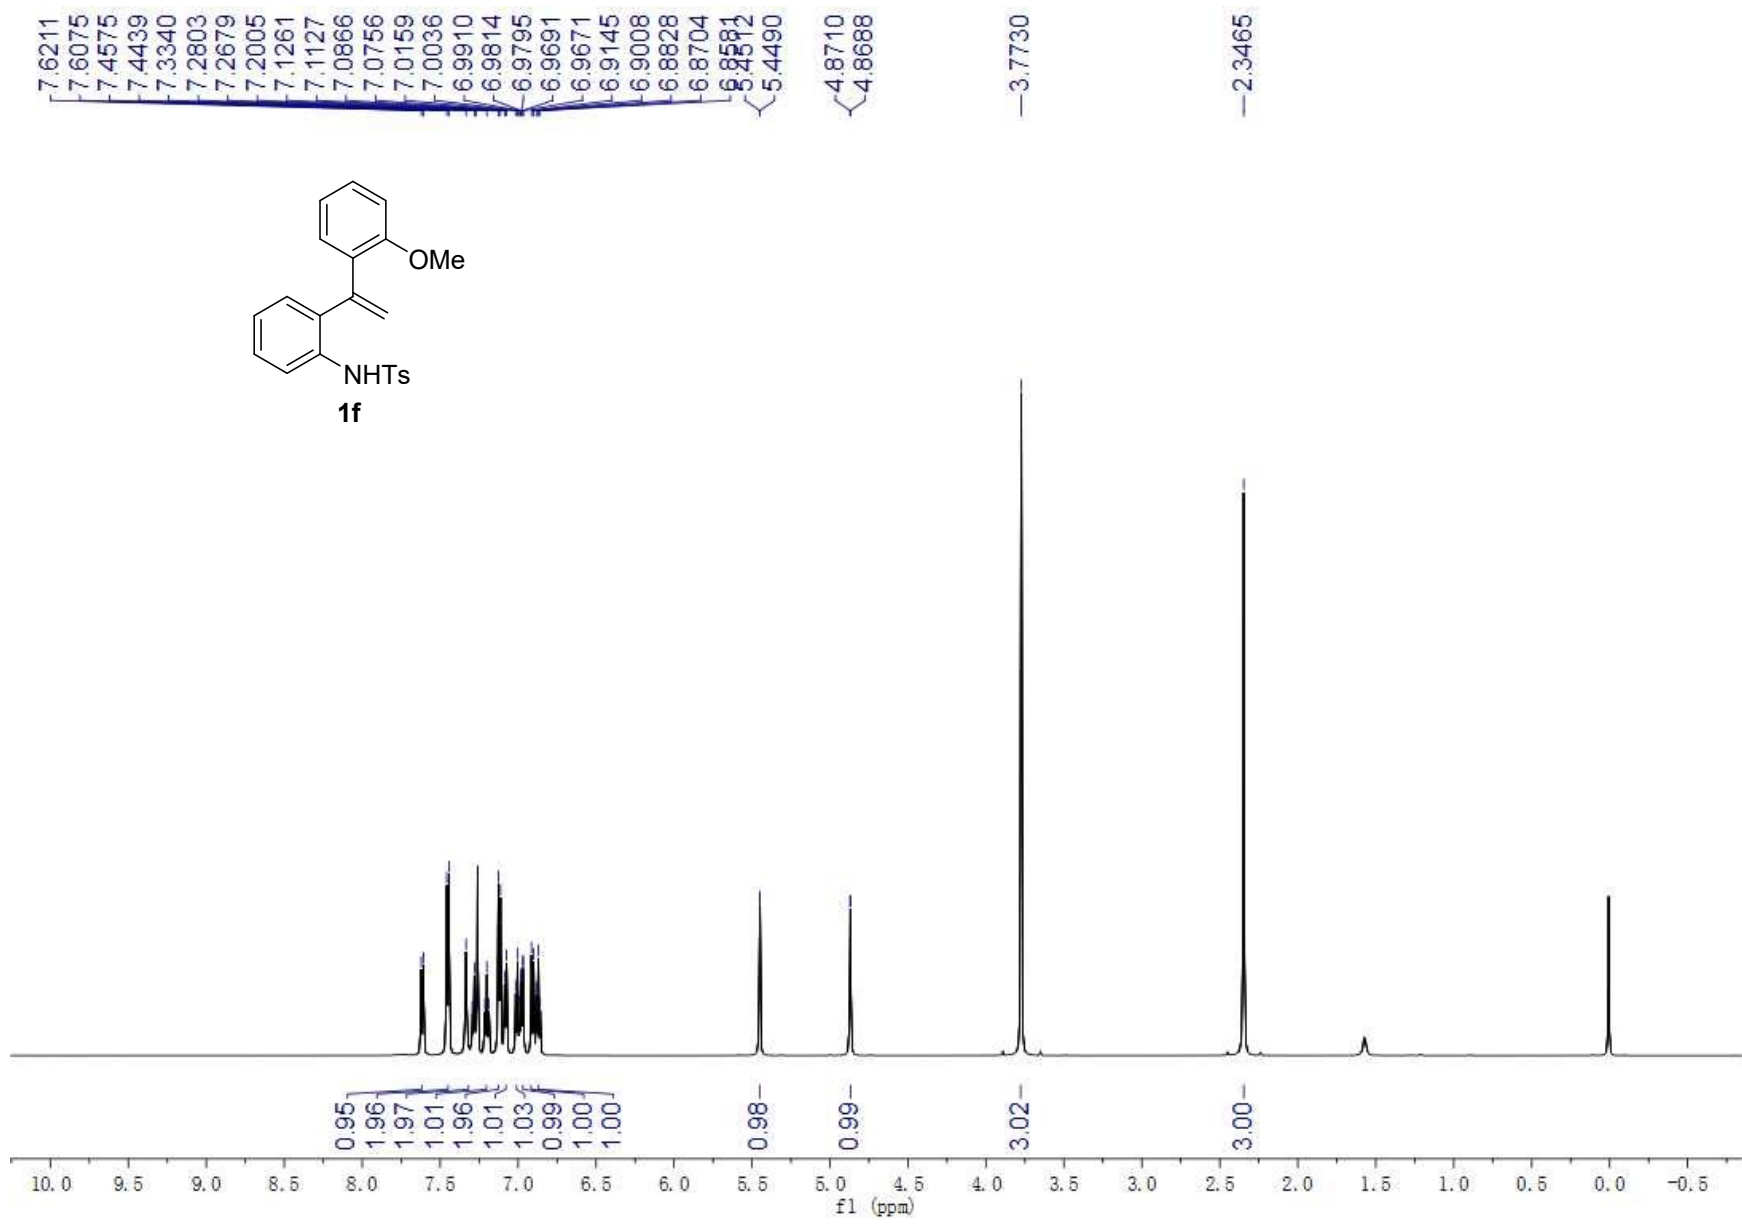

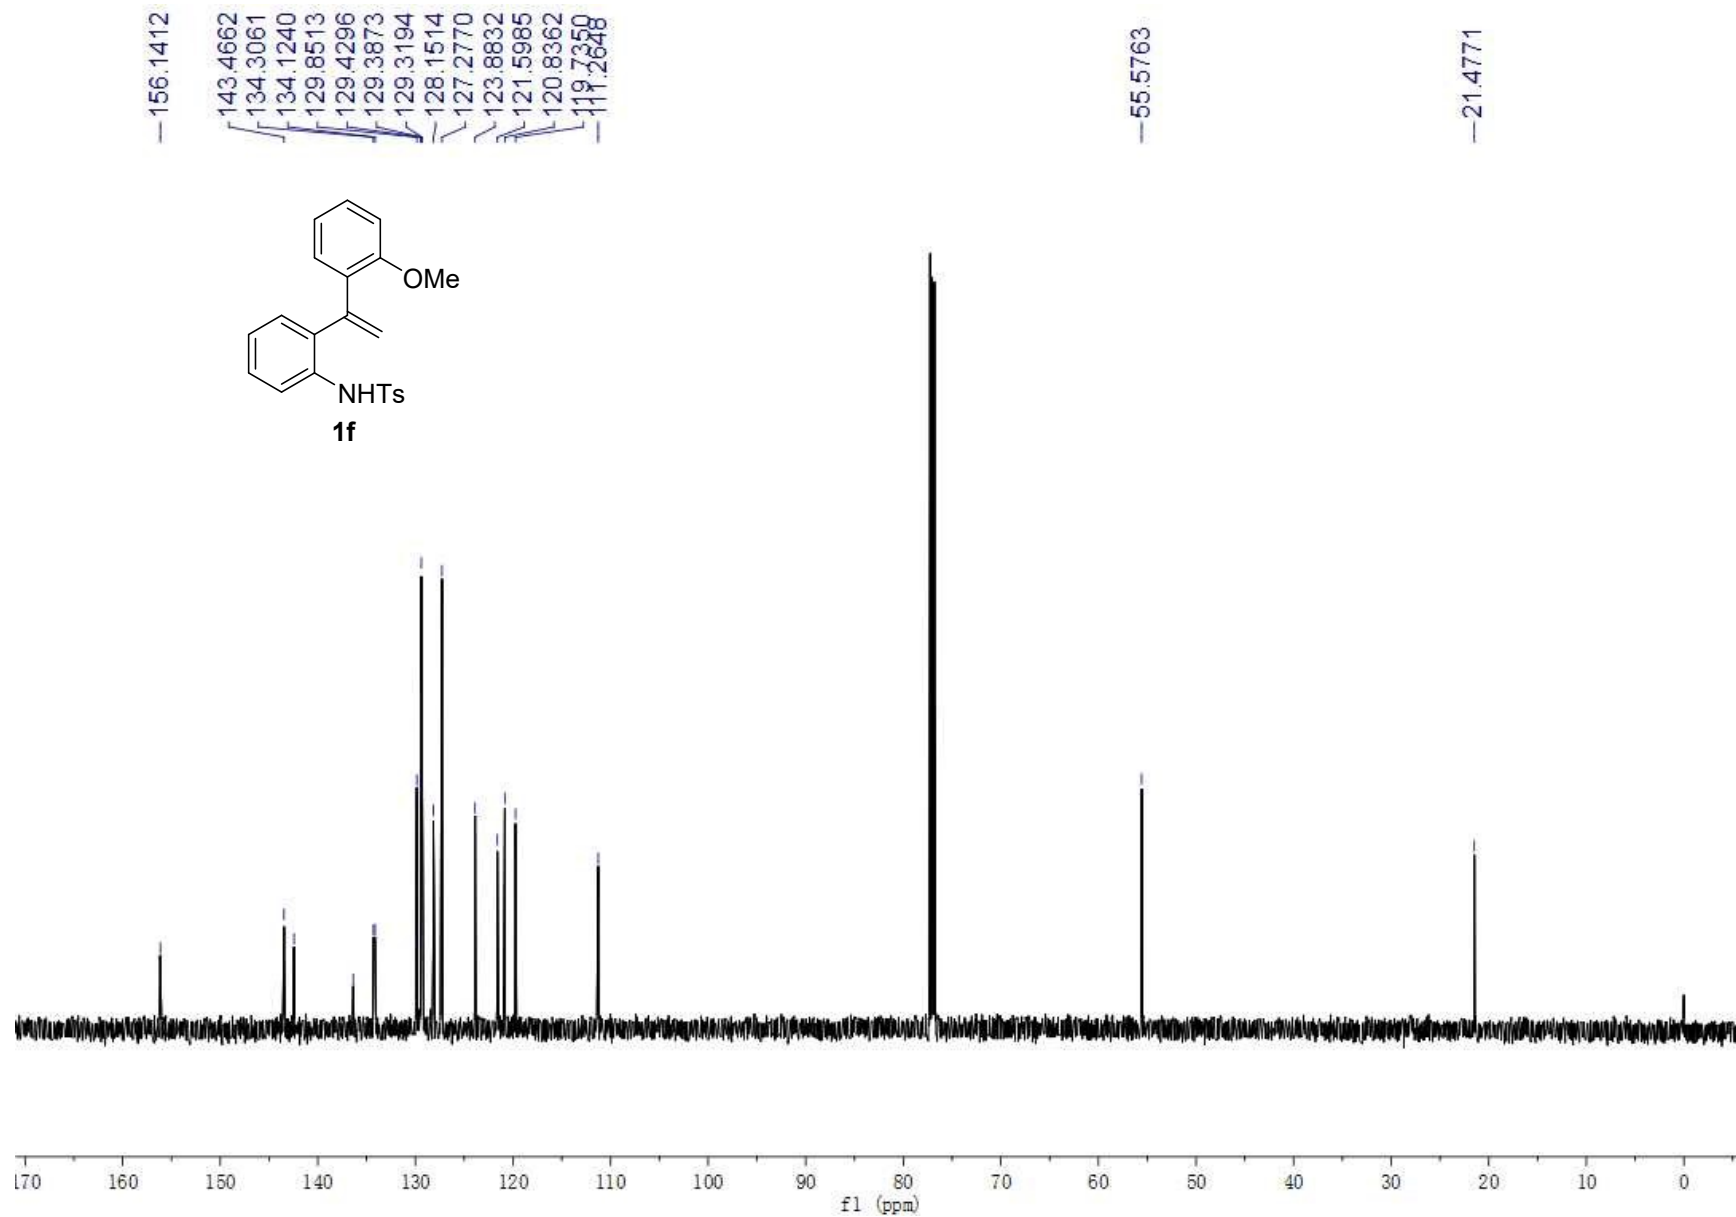

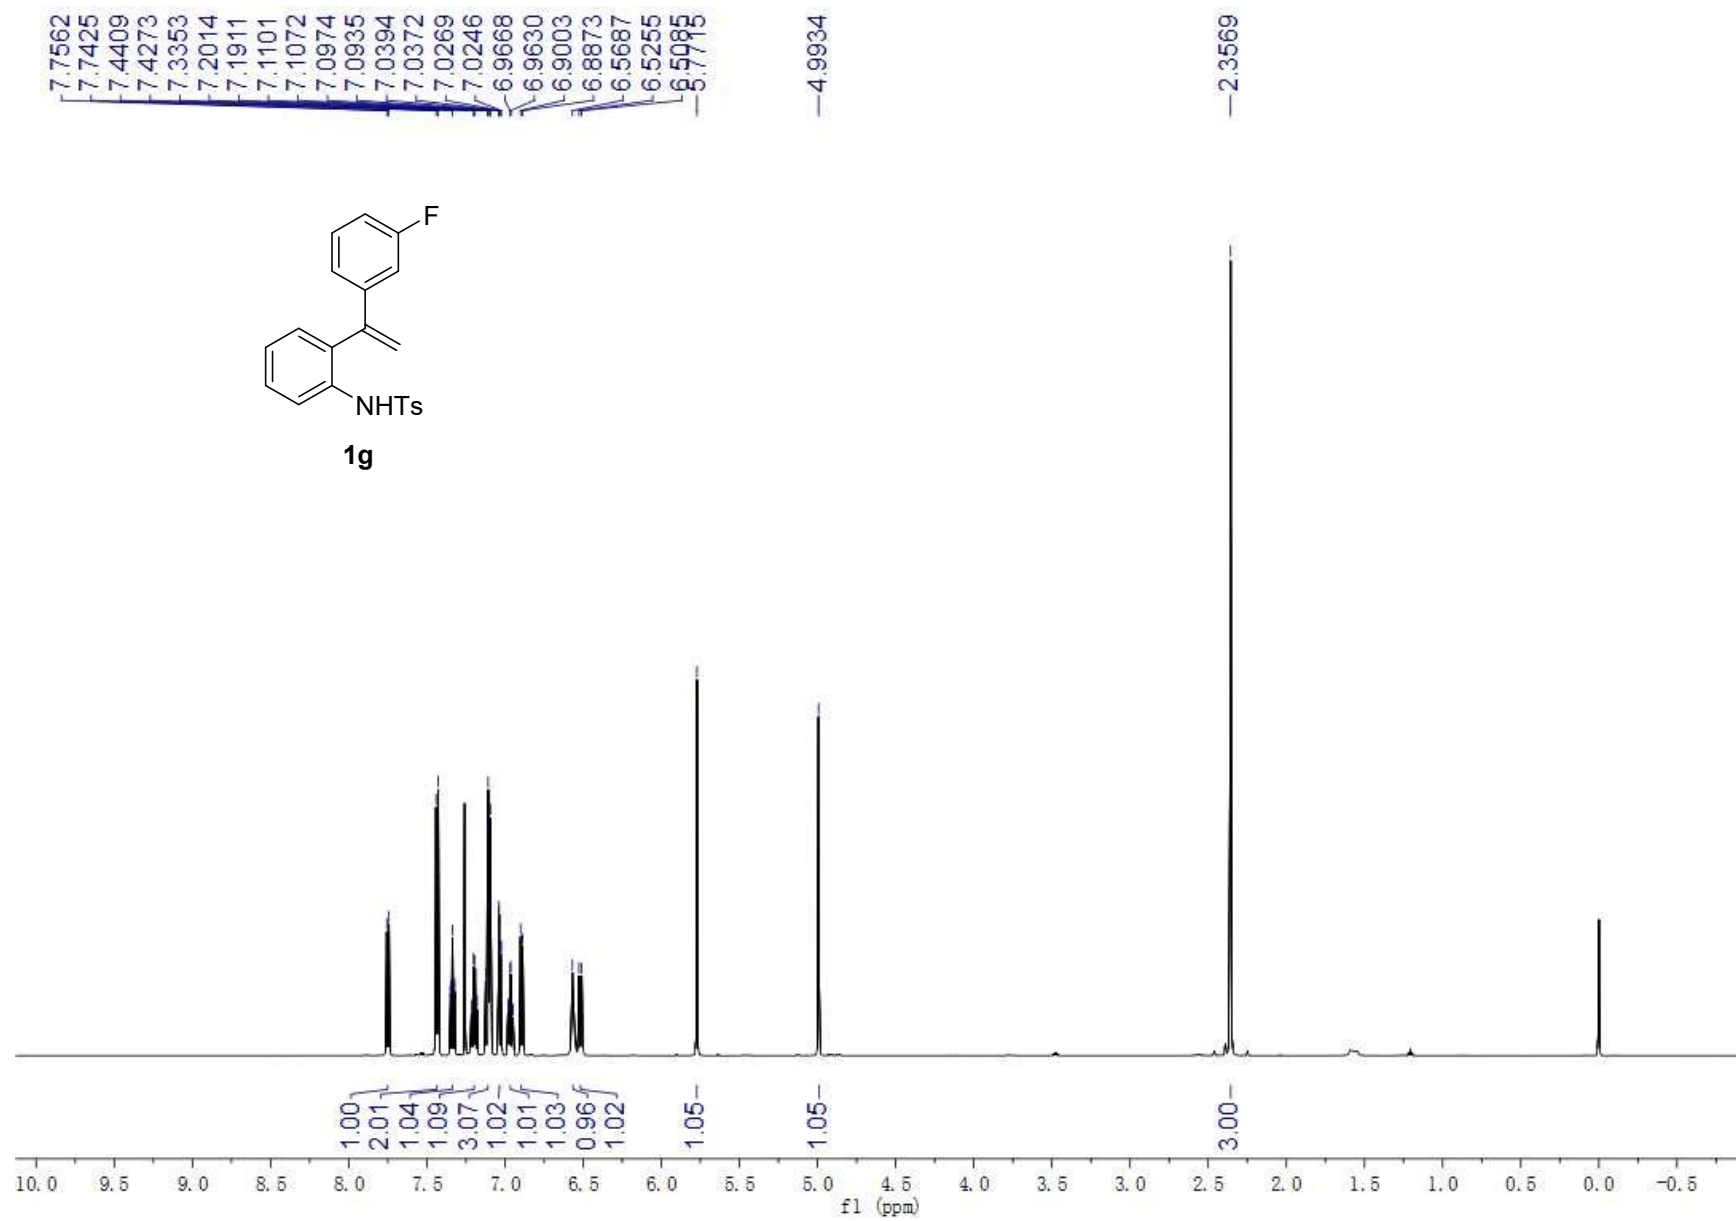

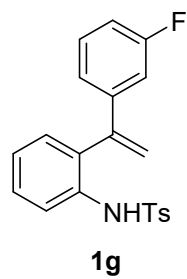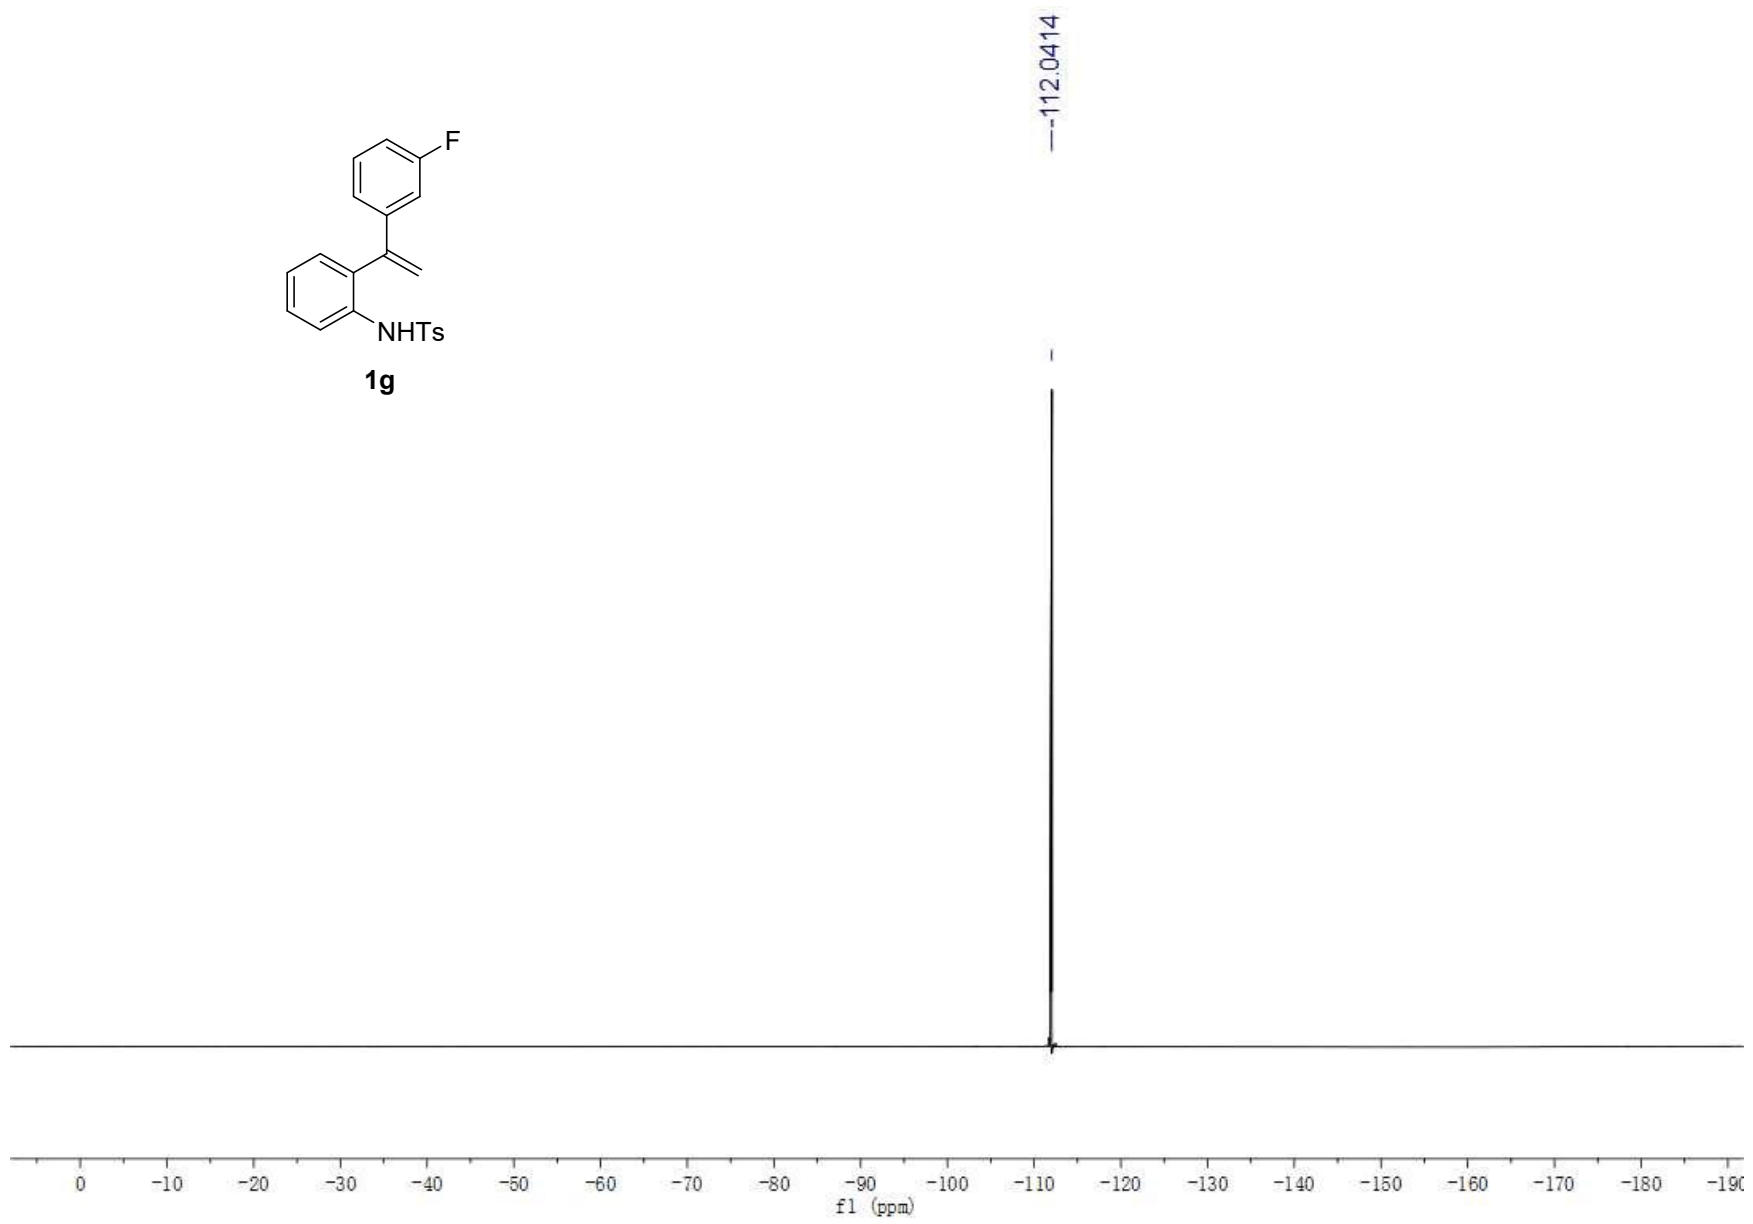

163.6880  
162.0542  
143.9509  
143.8947  
141.0433  
140.9951  
135.9638  
134.2454  
132.3054  
130.4412  
130.2440  
130.1888  
129.5094  
129.1106  
127.1170  
124.7792  
121.9325  
121.1289  
118.1772  
115.4290  
115.2883  
113.5197  
113.3713

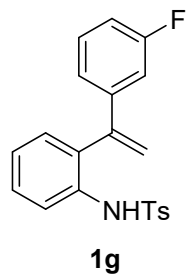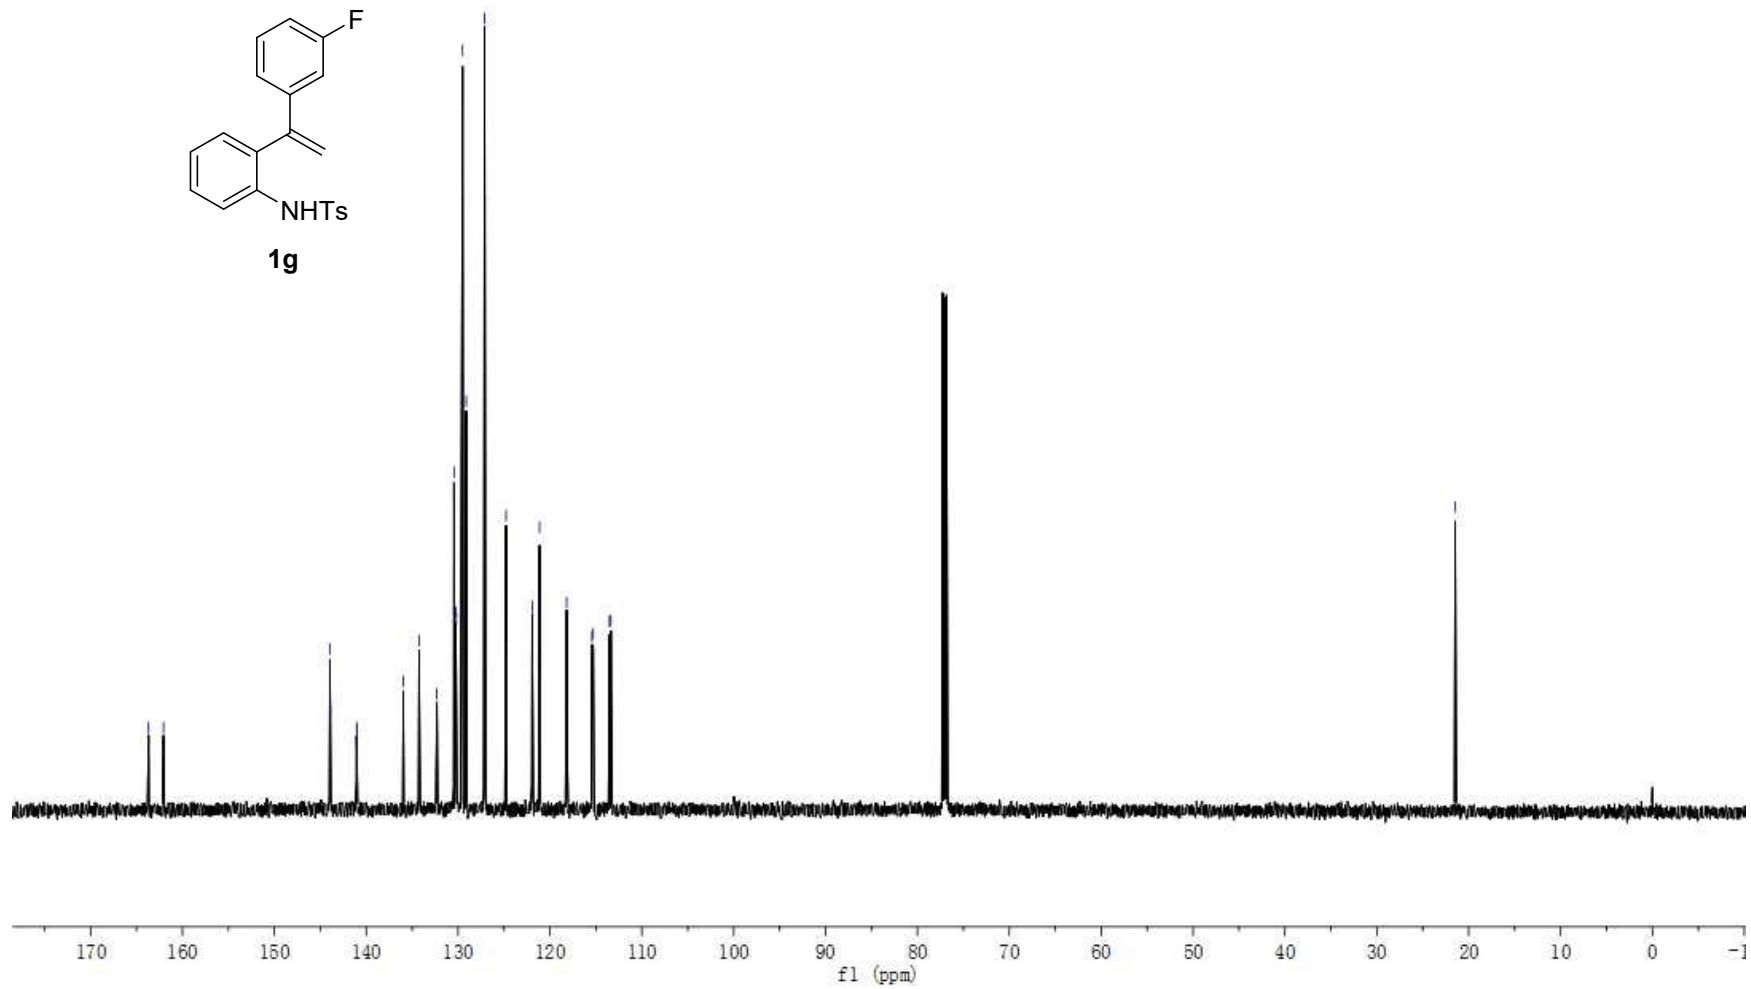

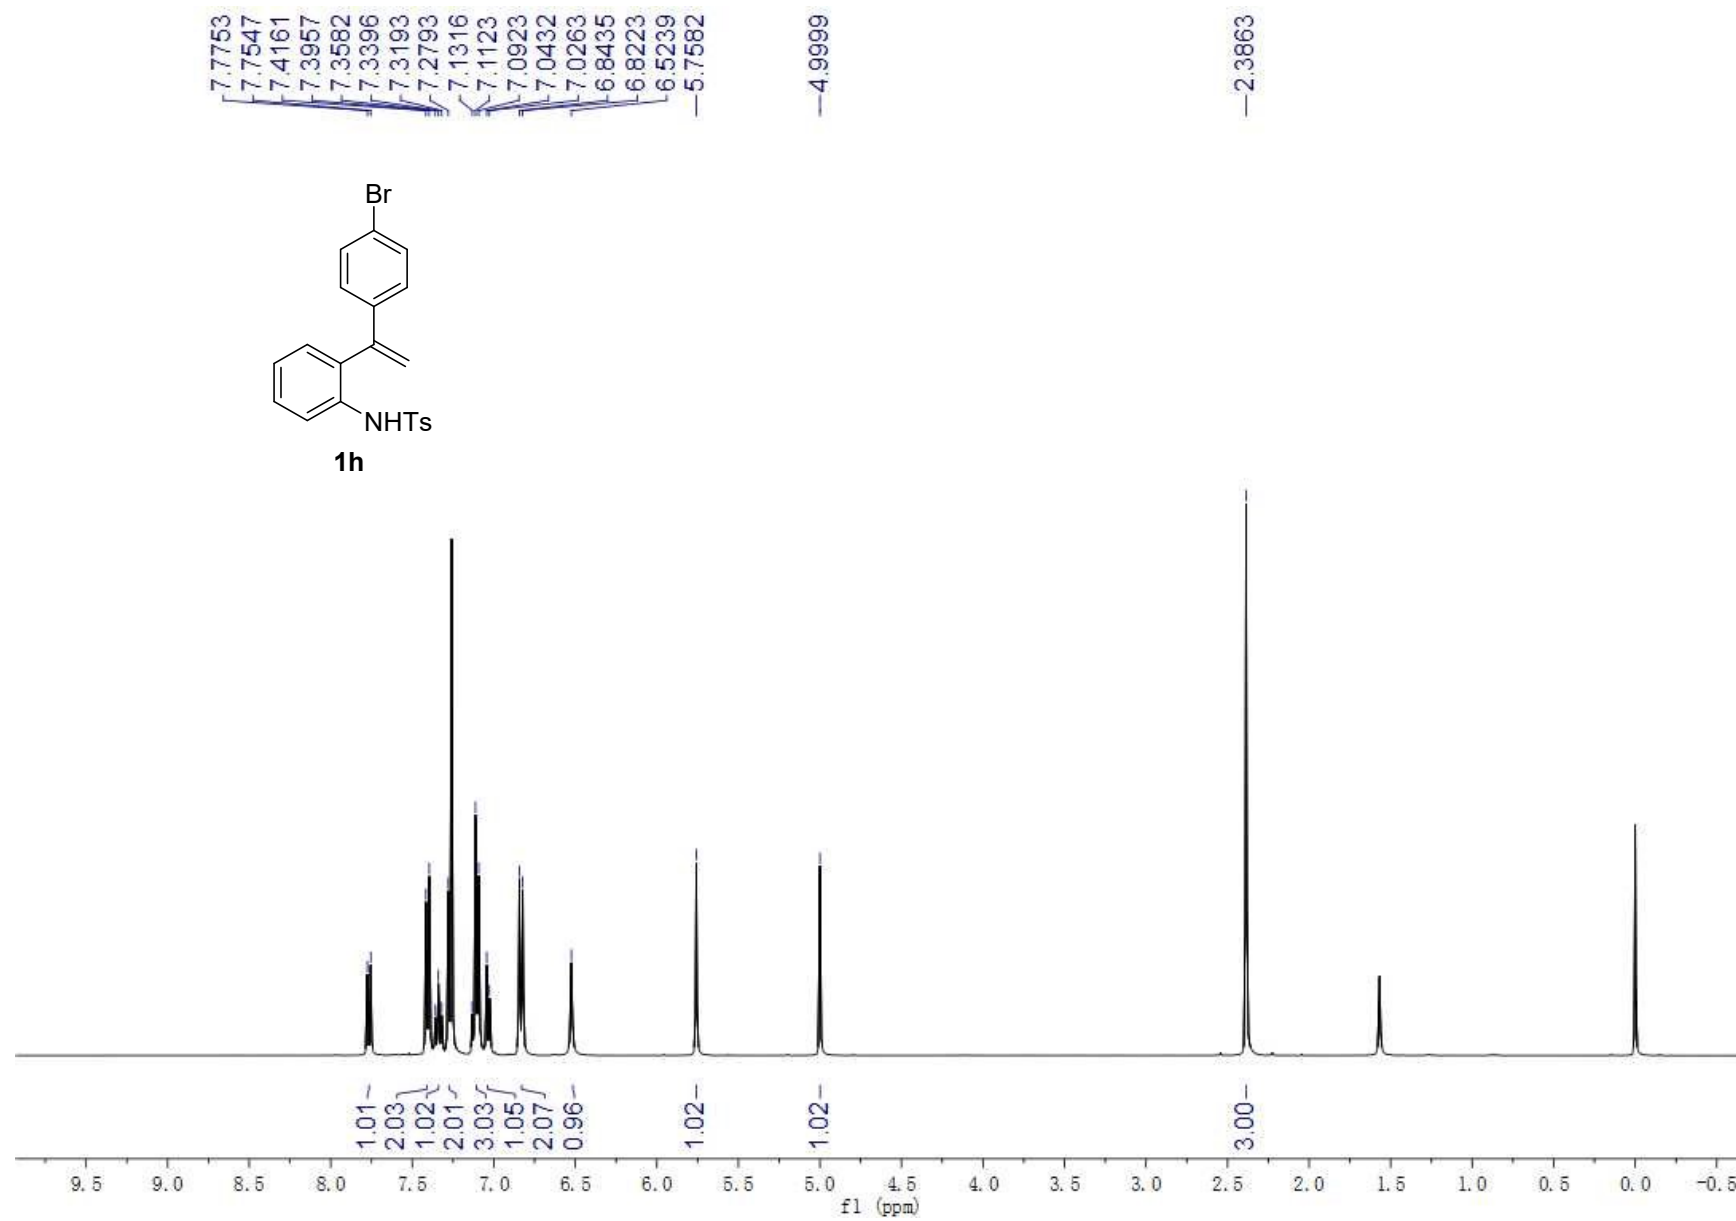



143.9086  
143.8683  
137.5424  
136.0437  
134.2154  
132.2506  
131.7739  
130.4388  
129.4915  
129.1270  
127.8118  
127.0535  
124.7316  
122.6760  
120.9321  
117.6714

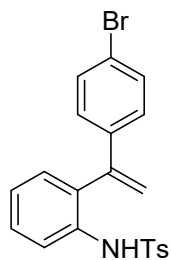

1h

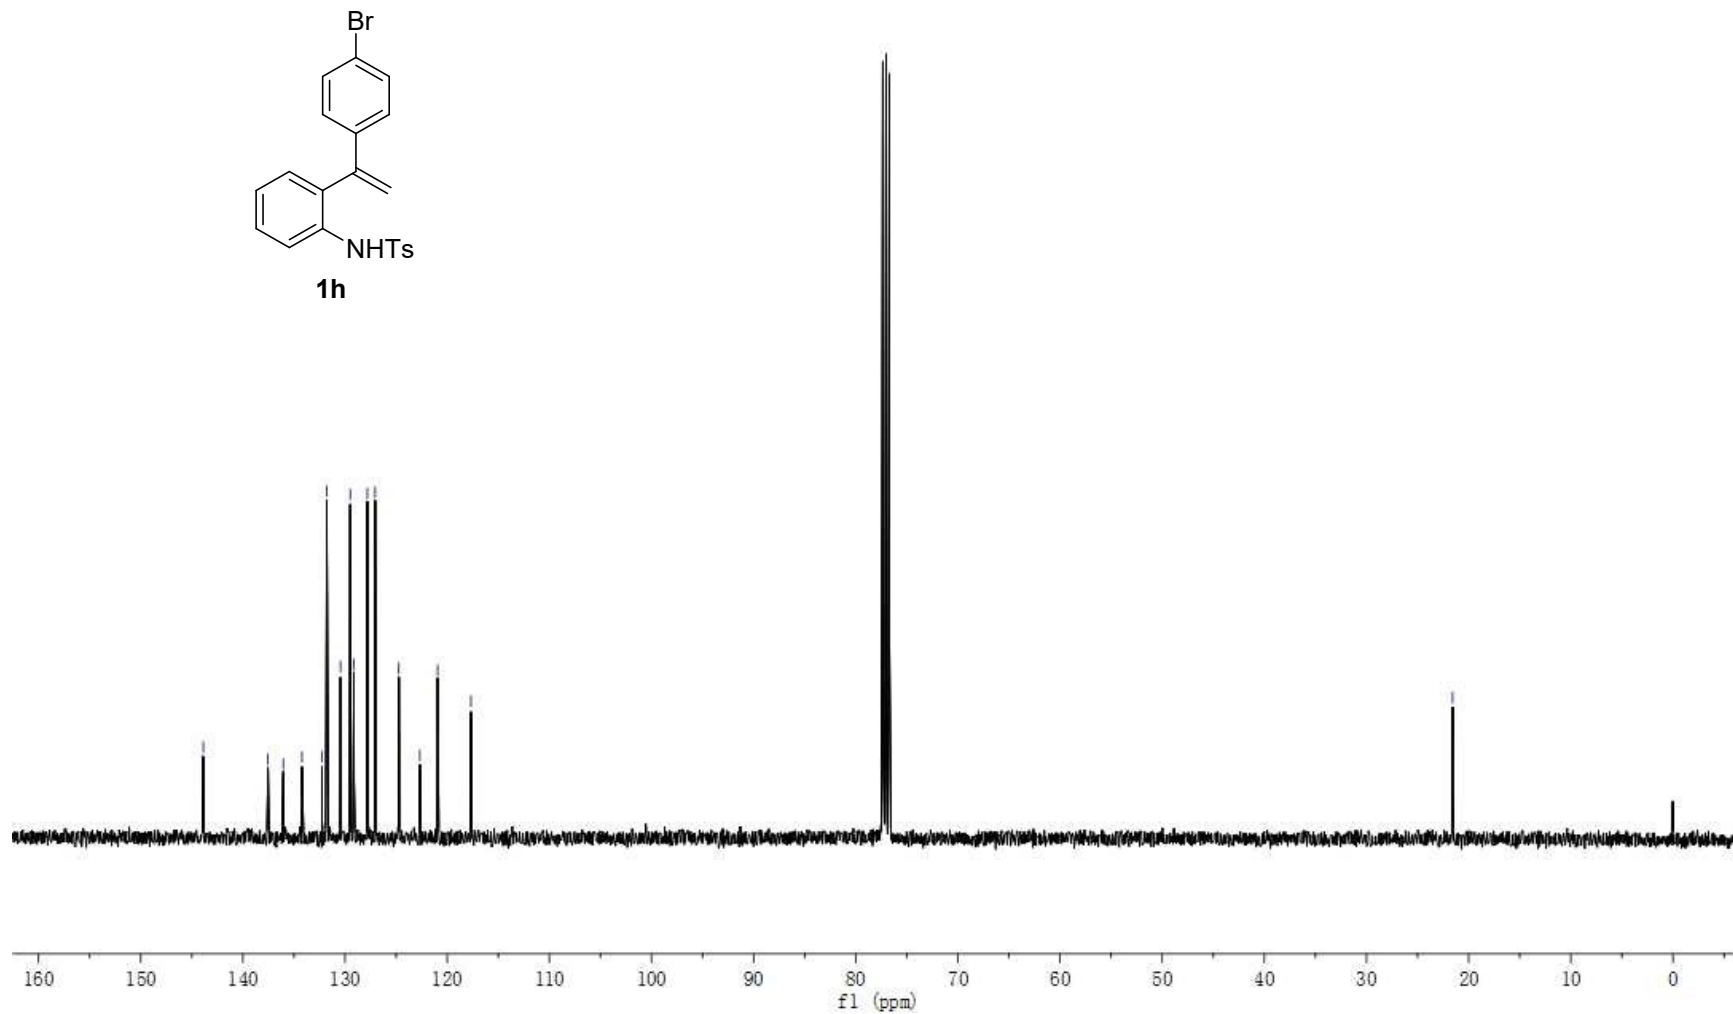

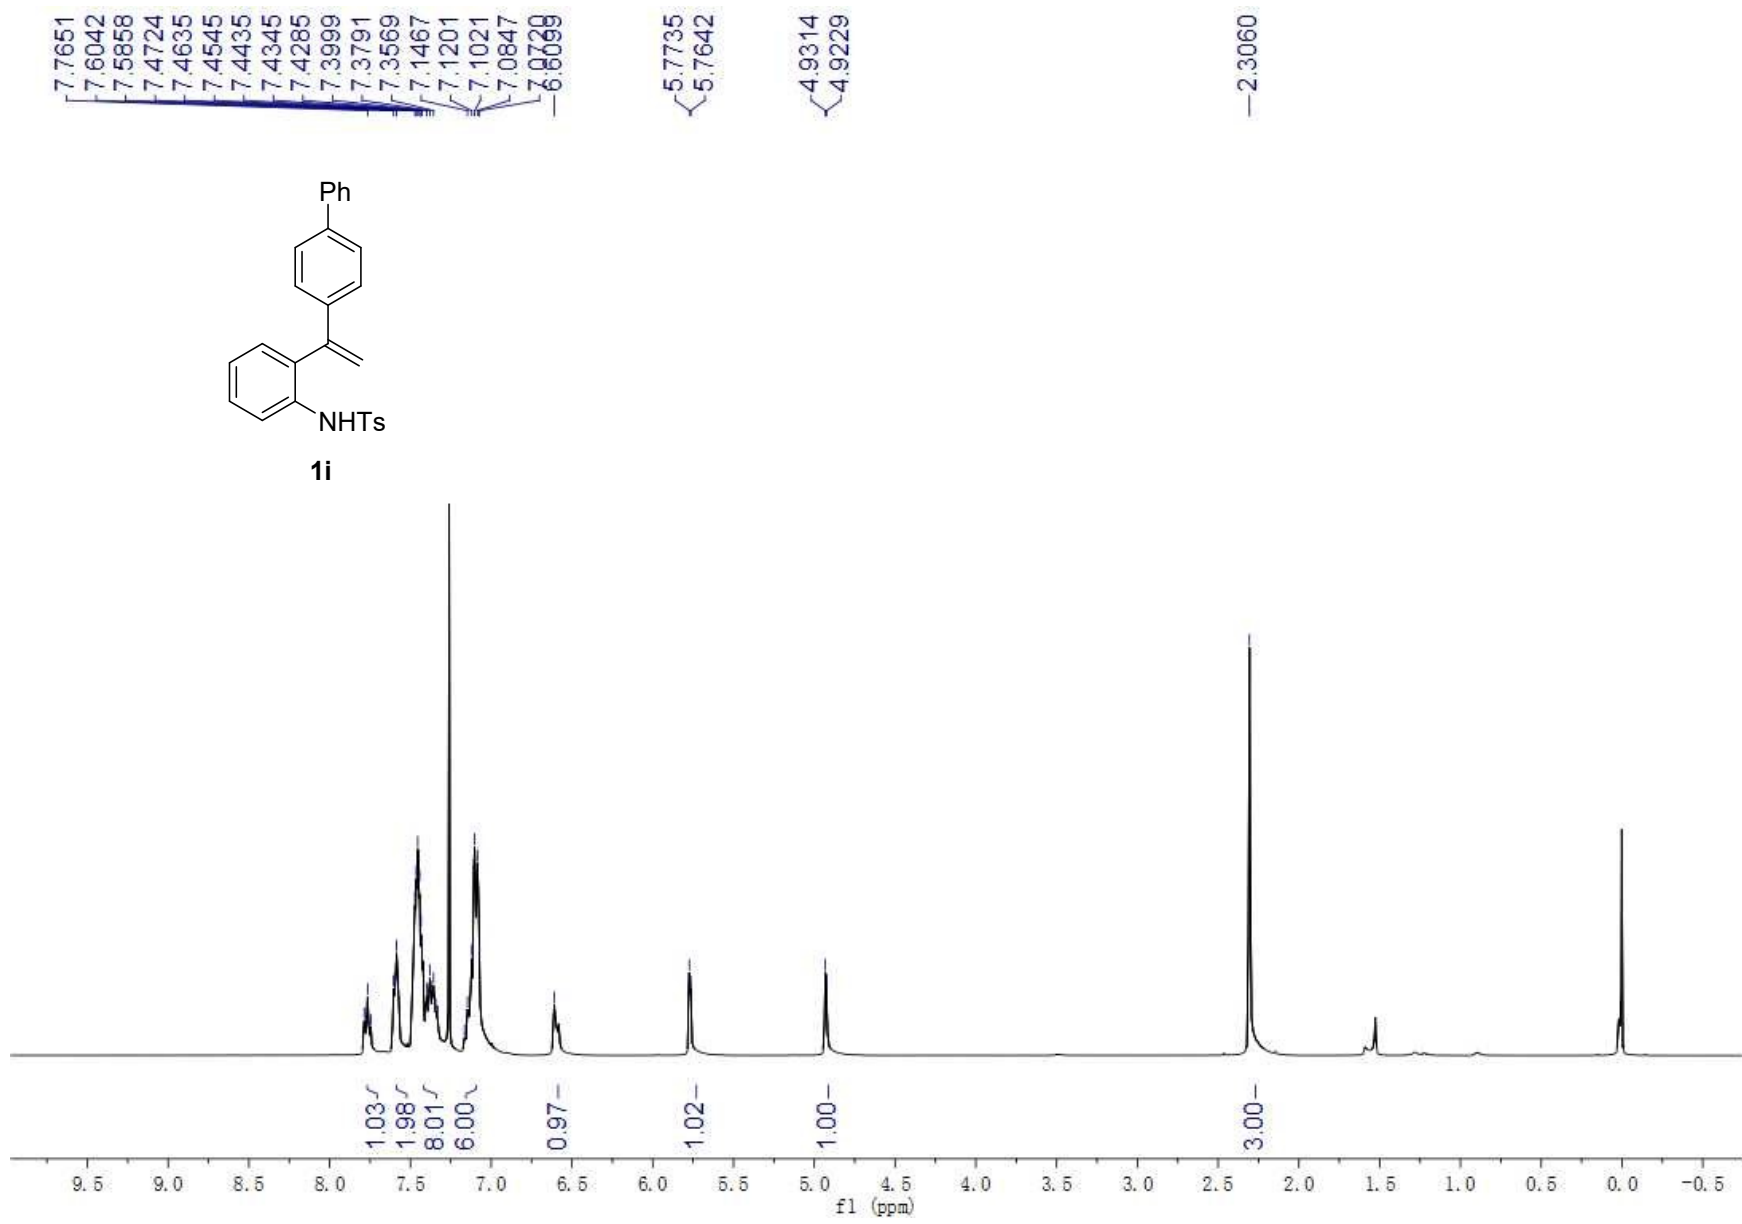

144.4904  
143.7559  
141.3104  
140.2389  
137.4750  
136.0807  
134.2917  
133.0157  
130.5242  
129.4775  
128.9444  
127.6970  
127.3856  
127.2185  
126.9576  
126.7793  
124.8105  
121.1064  
117.0520

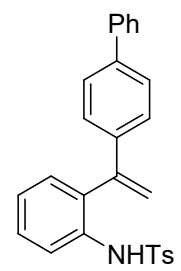

**1i**

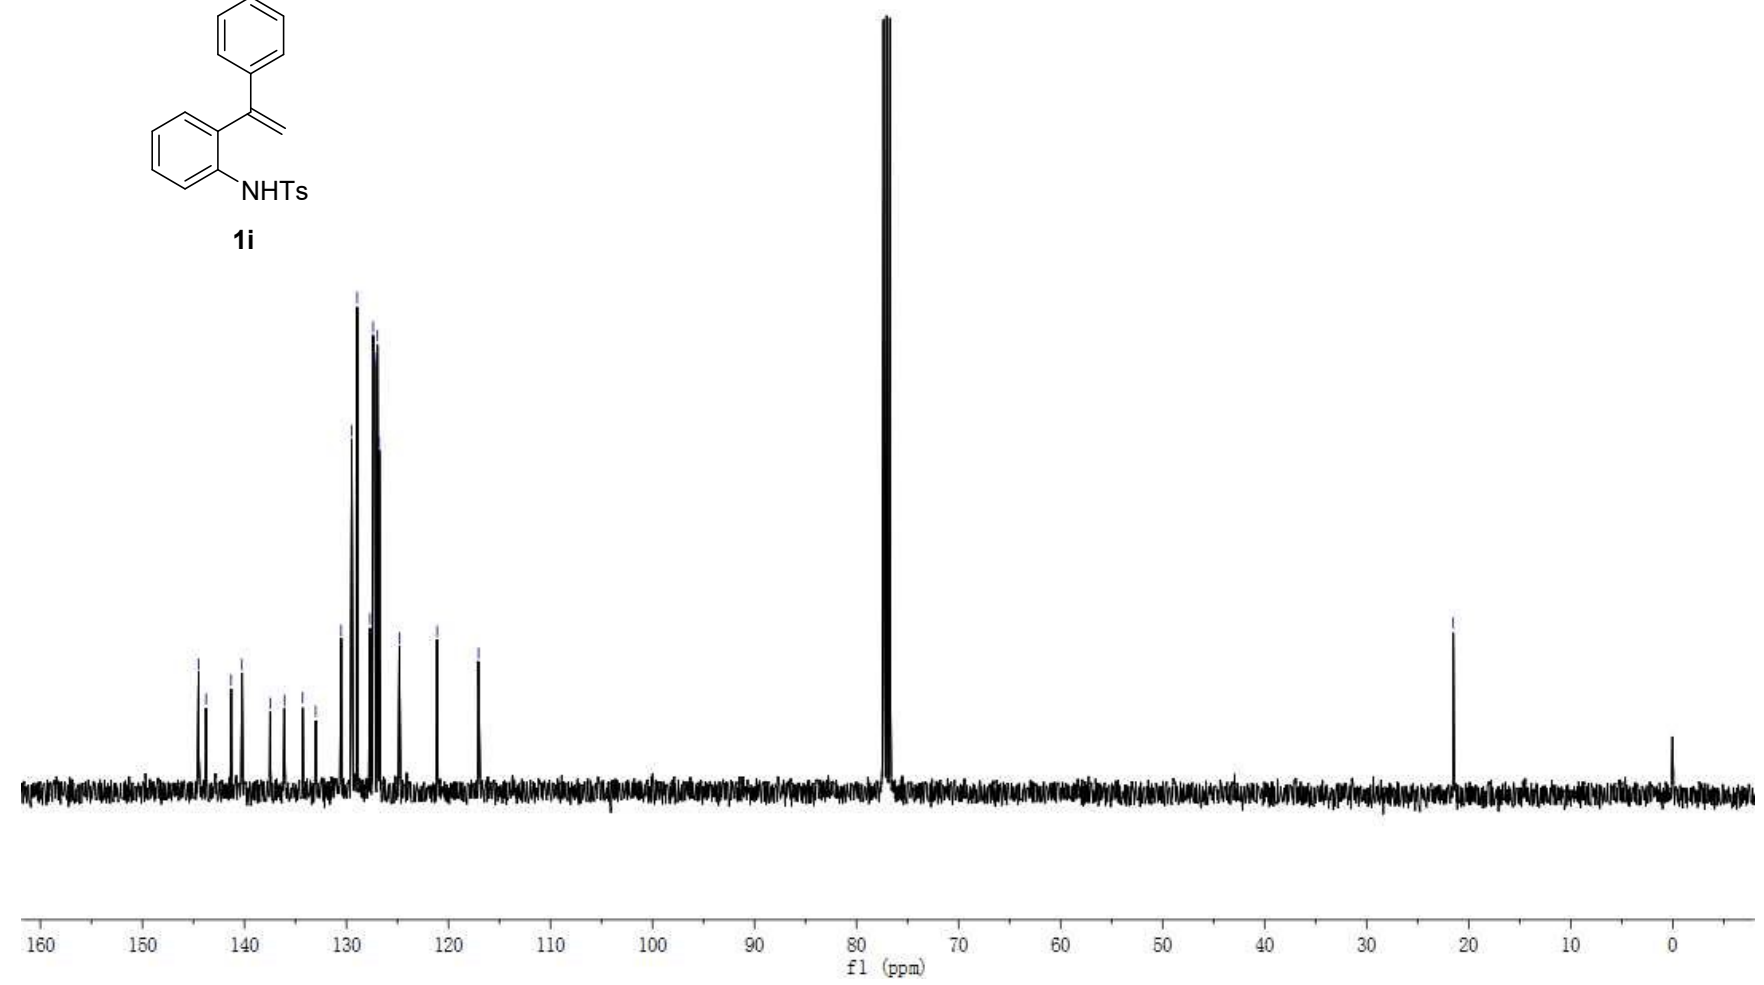

—21.5143

7.6486  
7.6348  
7.6265  
7.6127  
7.2197  
7.2170  
7.2092  
7.1958  
7.0424  
7.0378  
7.0318  
7.0157  
7.0130  
5.9939  
5.9862  
-4.6768

-2.3561  
-1.6985

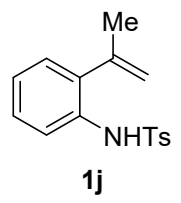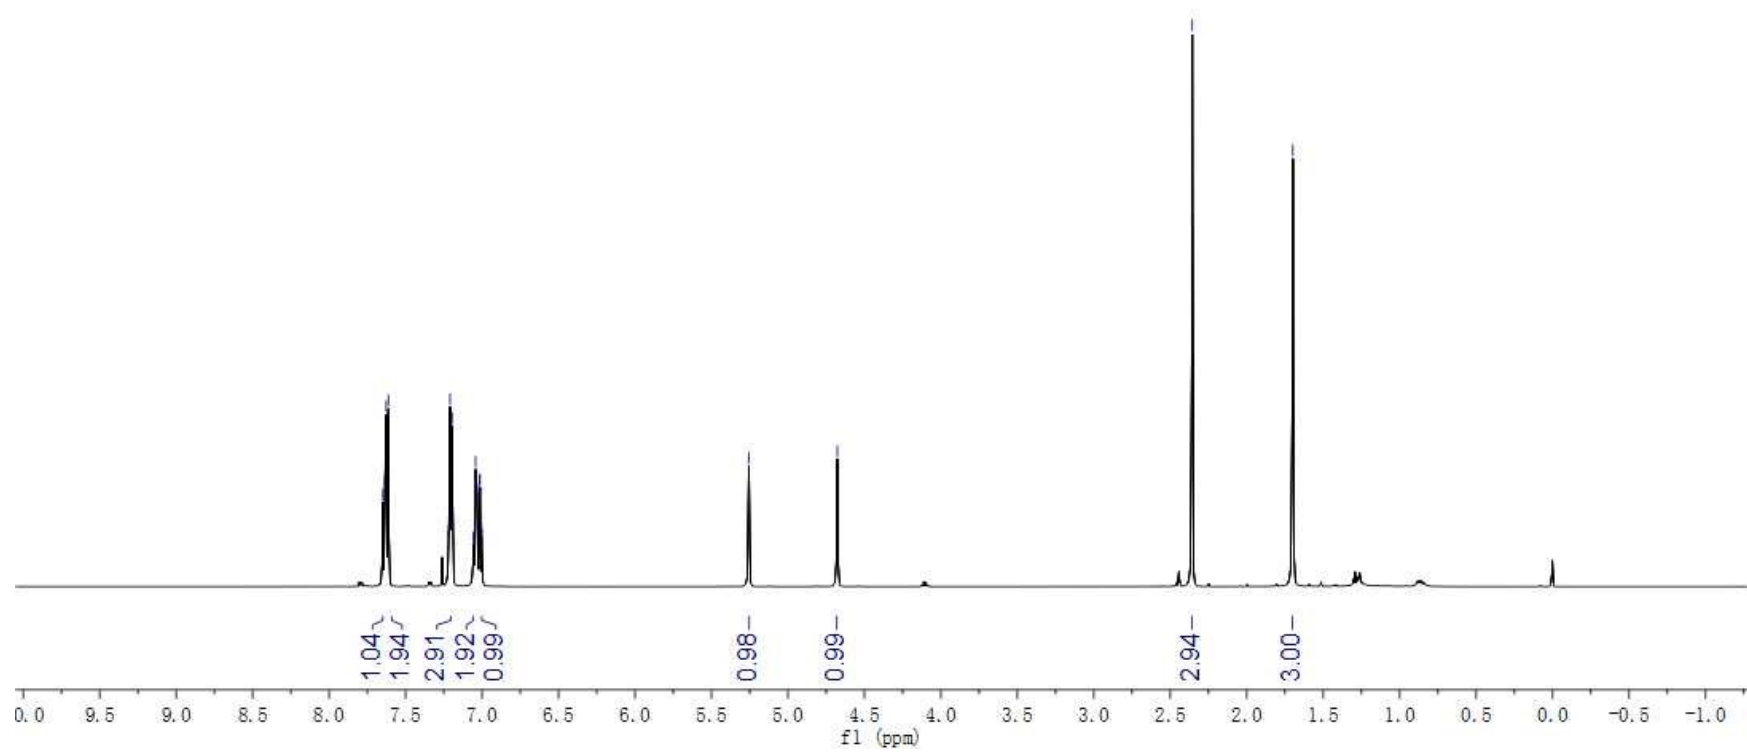

143.8807  
142.0628  
136.3490  
134.7543  
132.8657  
129.5790  
128.0290  
127.9773  
127.2236  
124.3929  
120.5549  
117.1131

-24.3786  
-21.4800

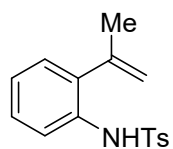

1j

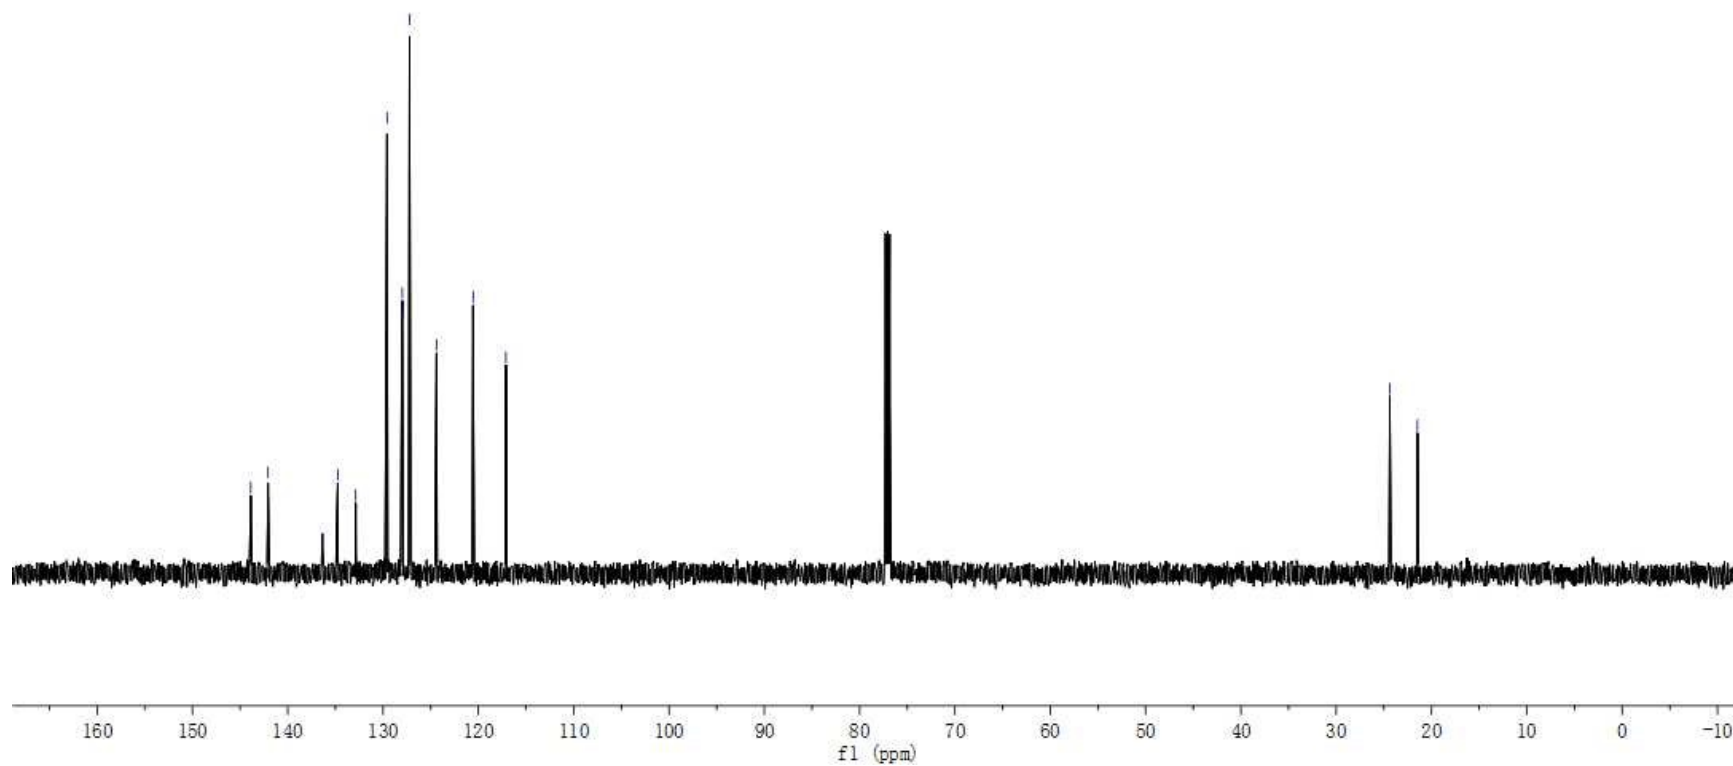

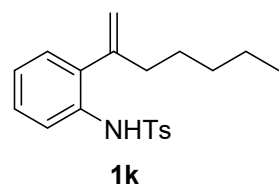

7.6804  
 7.6666  
 7.6415  
 7.6279  
 7.2256  
 7.2095  
 7.1958  
 7.0437  
 7.0312  
 7.0188  
 6.9805  
 6.9679  
 6.9490

-5.2273

-4.6884

-2.3607  
 1.9369  
 1.9251  
 1.9119

1.2413  
 1.2362  
 1.2293  
 1.2242  
 1.2125  
 1.2007  
 1.1875  
 1.1746  
 1.1583  
 1.1476  
 0.8691  
 0.8572  
 0.8450

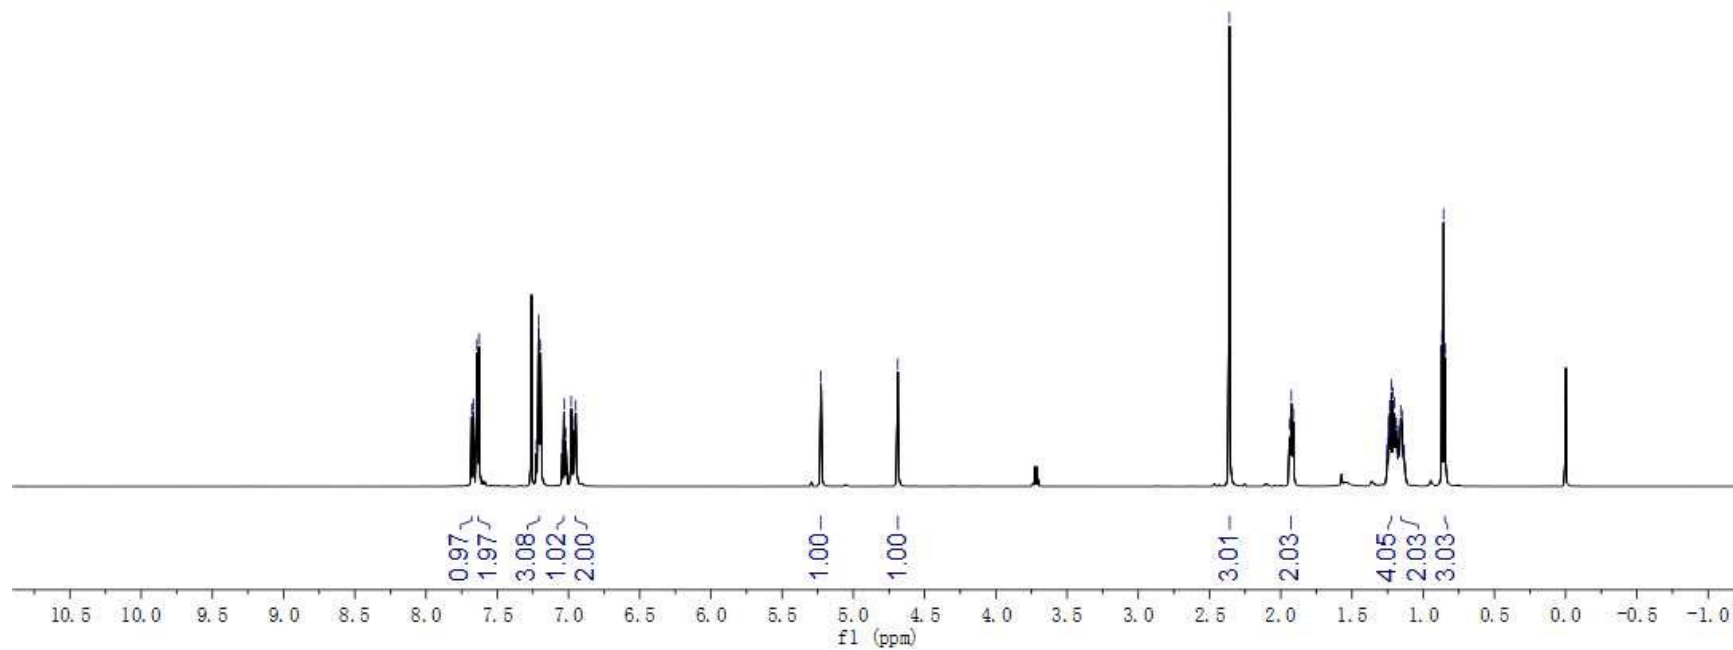

146.5703  
143.8429  
133.9367  
133.3694  
129.5821  
128.3336  
127.9666  
127.1792  
124.0161  
119.7612  
115.8604

37.7691  
31.5108  
27.1420  
22.3846  
21.4589  
13.9735

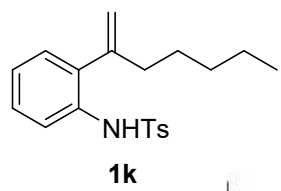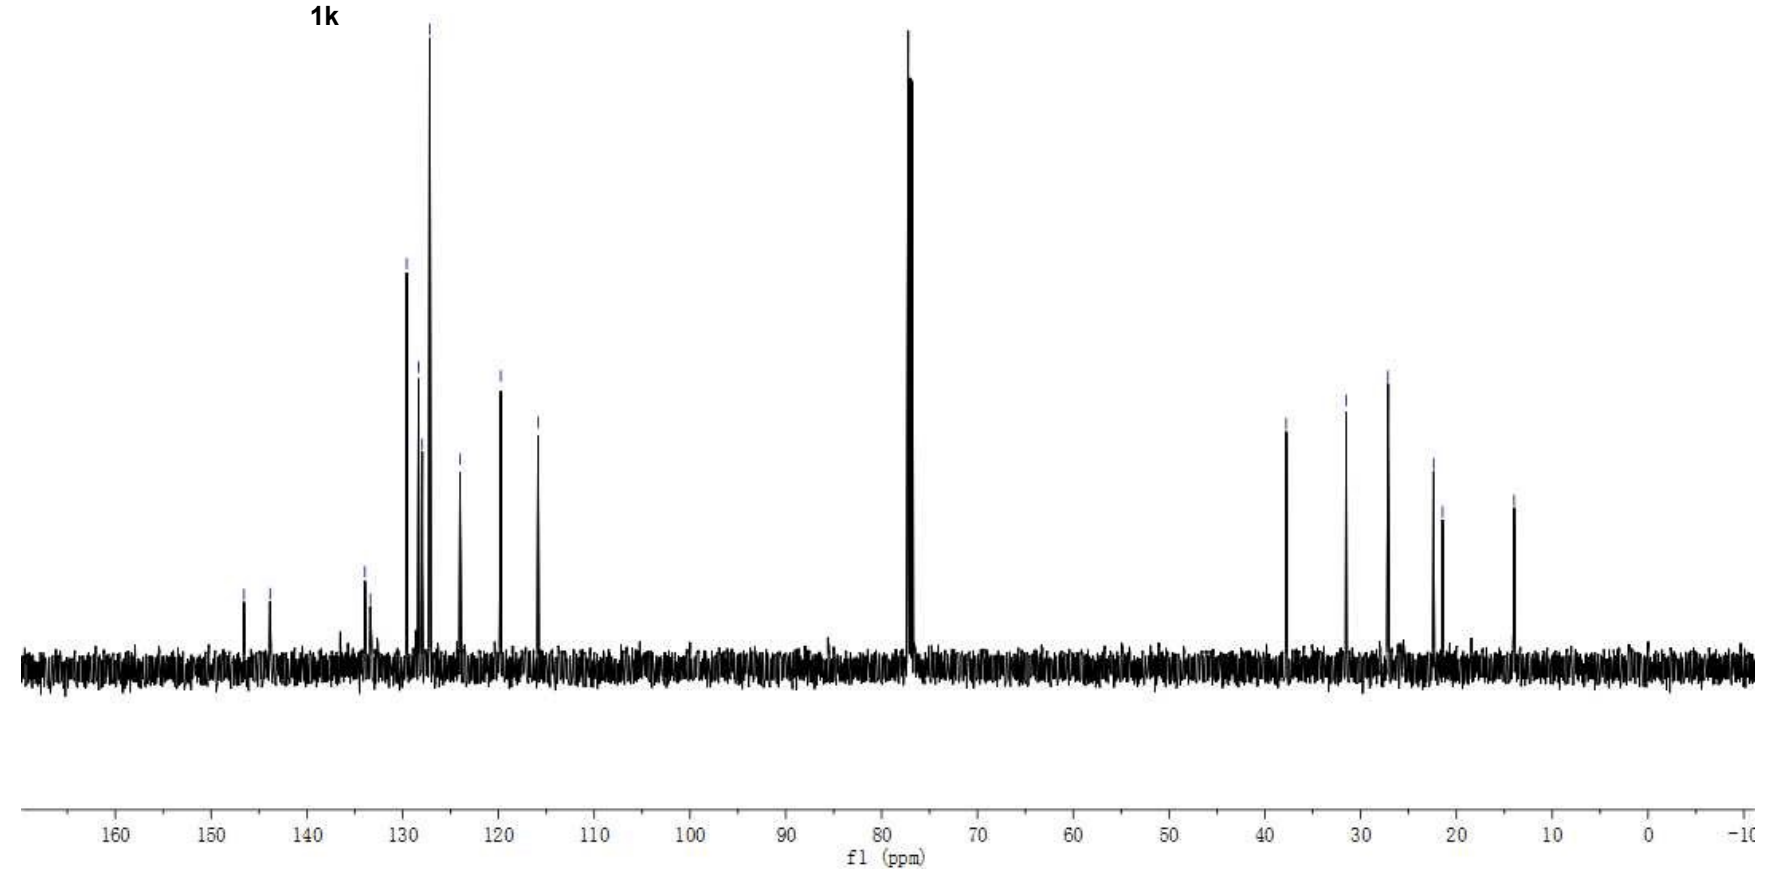

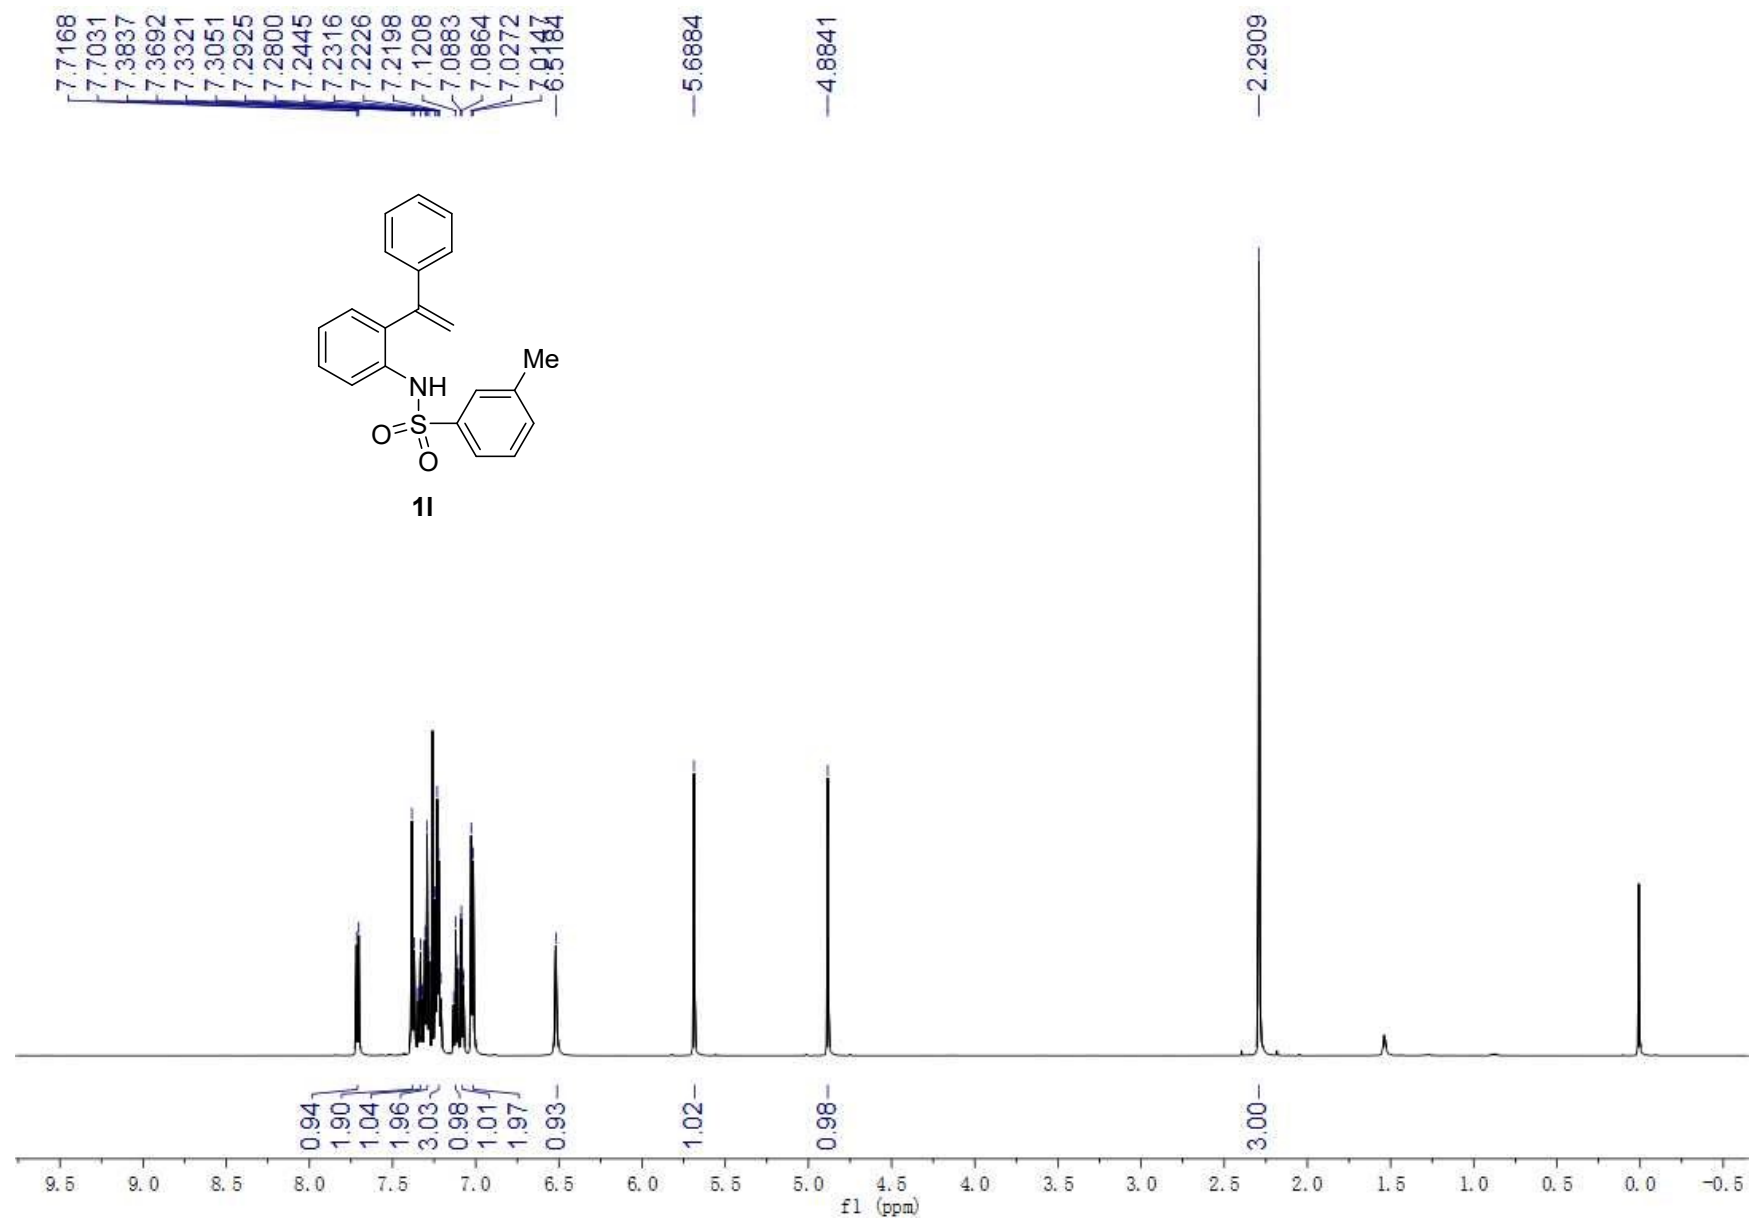



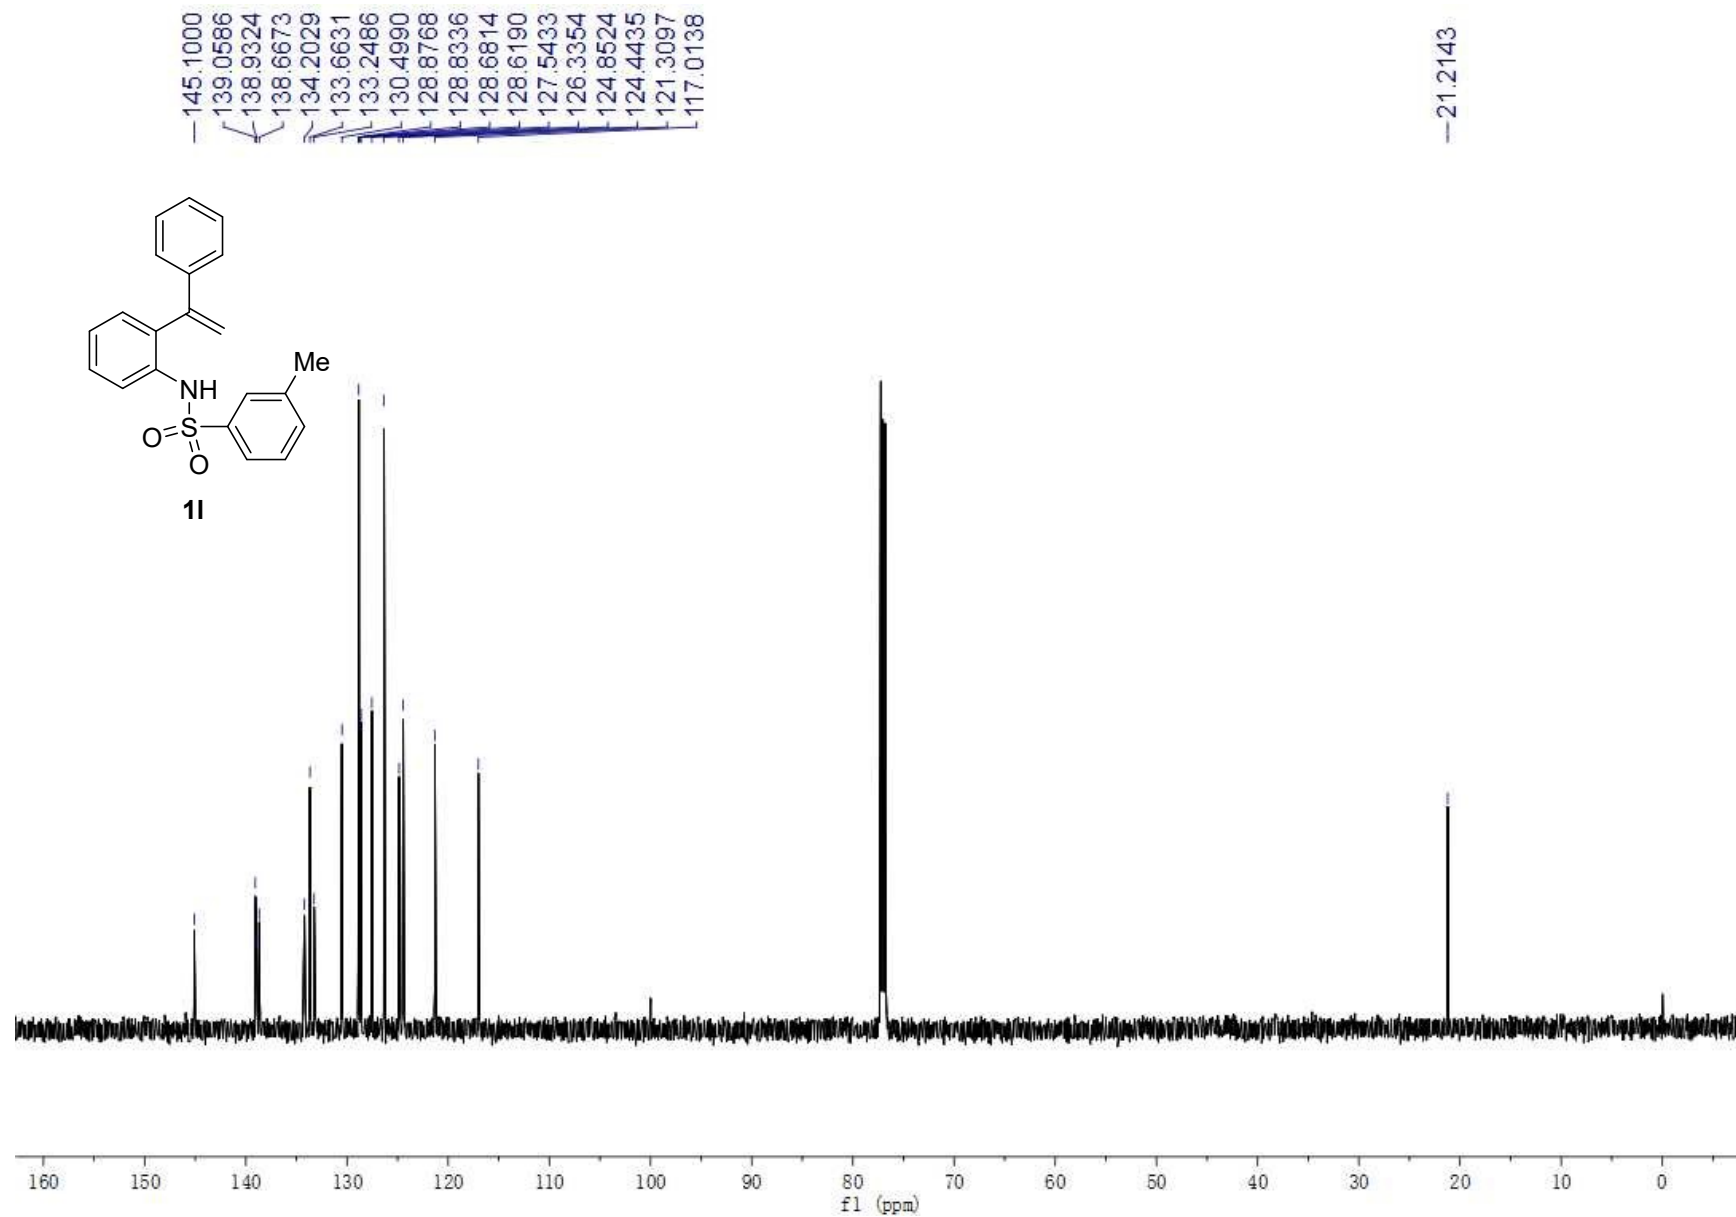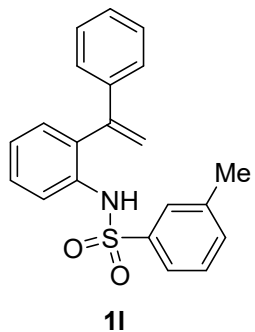

7.7081  
7.4451  
7.4231  
7.3045  
7.2573  
7.2538  
7.2458  
7.2407  
7.2303  
7.2267  
7.1557  
7.1145  
7.1103  
6.9961  
6.9935  
6.9758  
6.9722

5.7062  
5.7040

4.9291  
4.9270

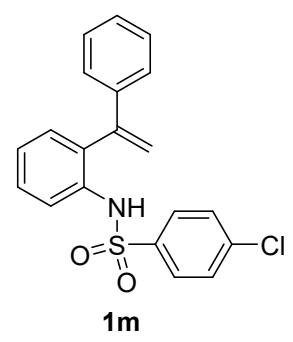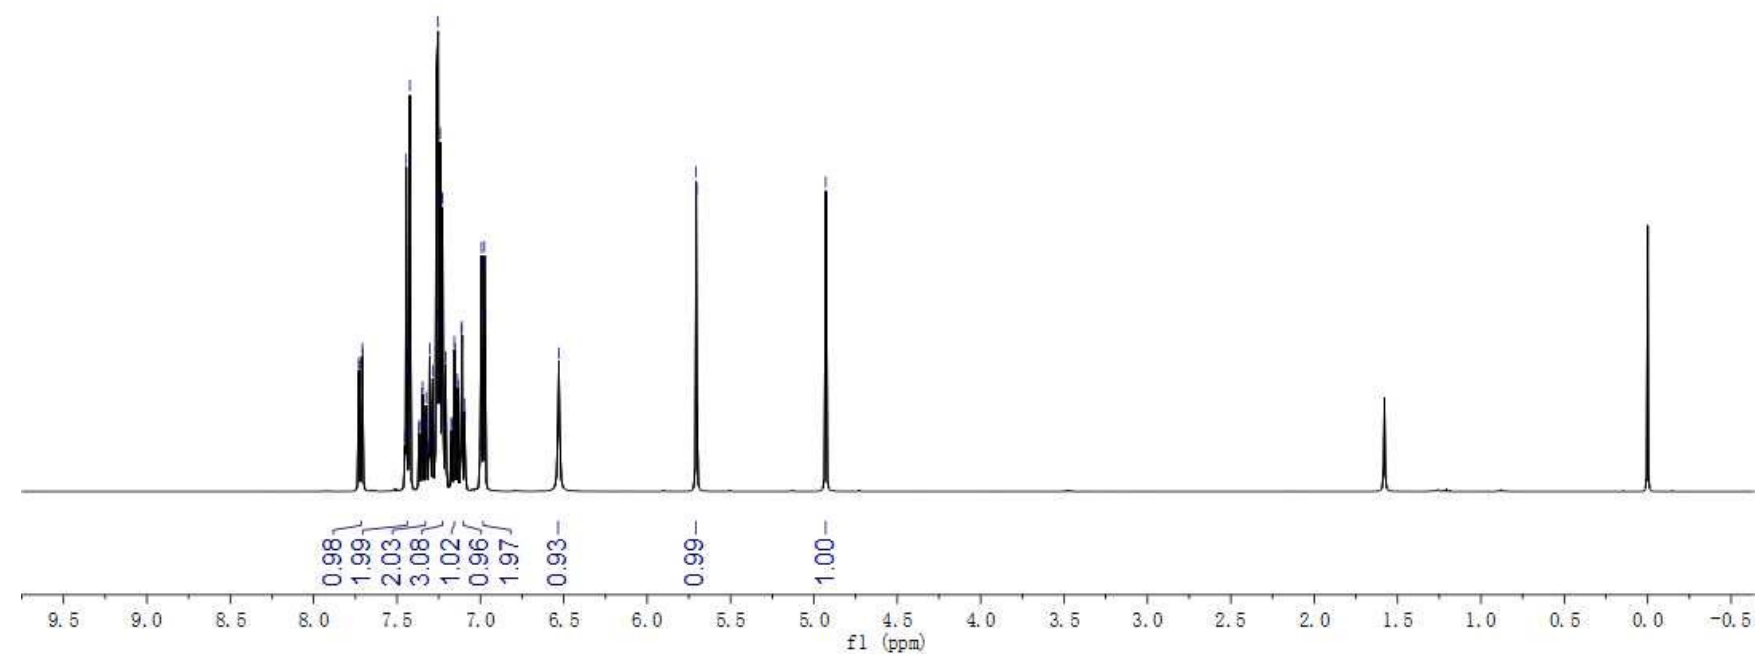

144.9495  
139.4492  
138.4560  
137.3872  
133.6977  
133.4776  
130.6733  
129.1469  
129.0301  
128.9227  
128.7196  
128.5532  
126.2148  
125.3037  
121.6455  
117.2441

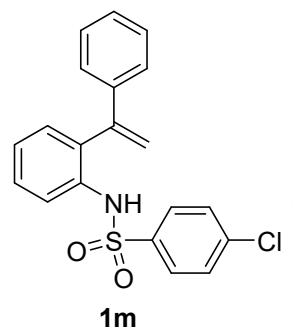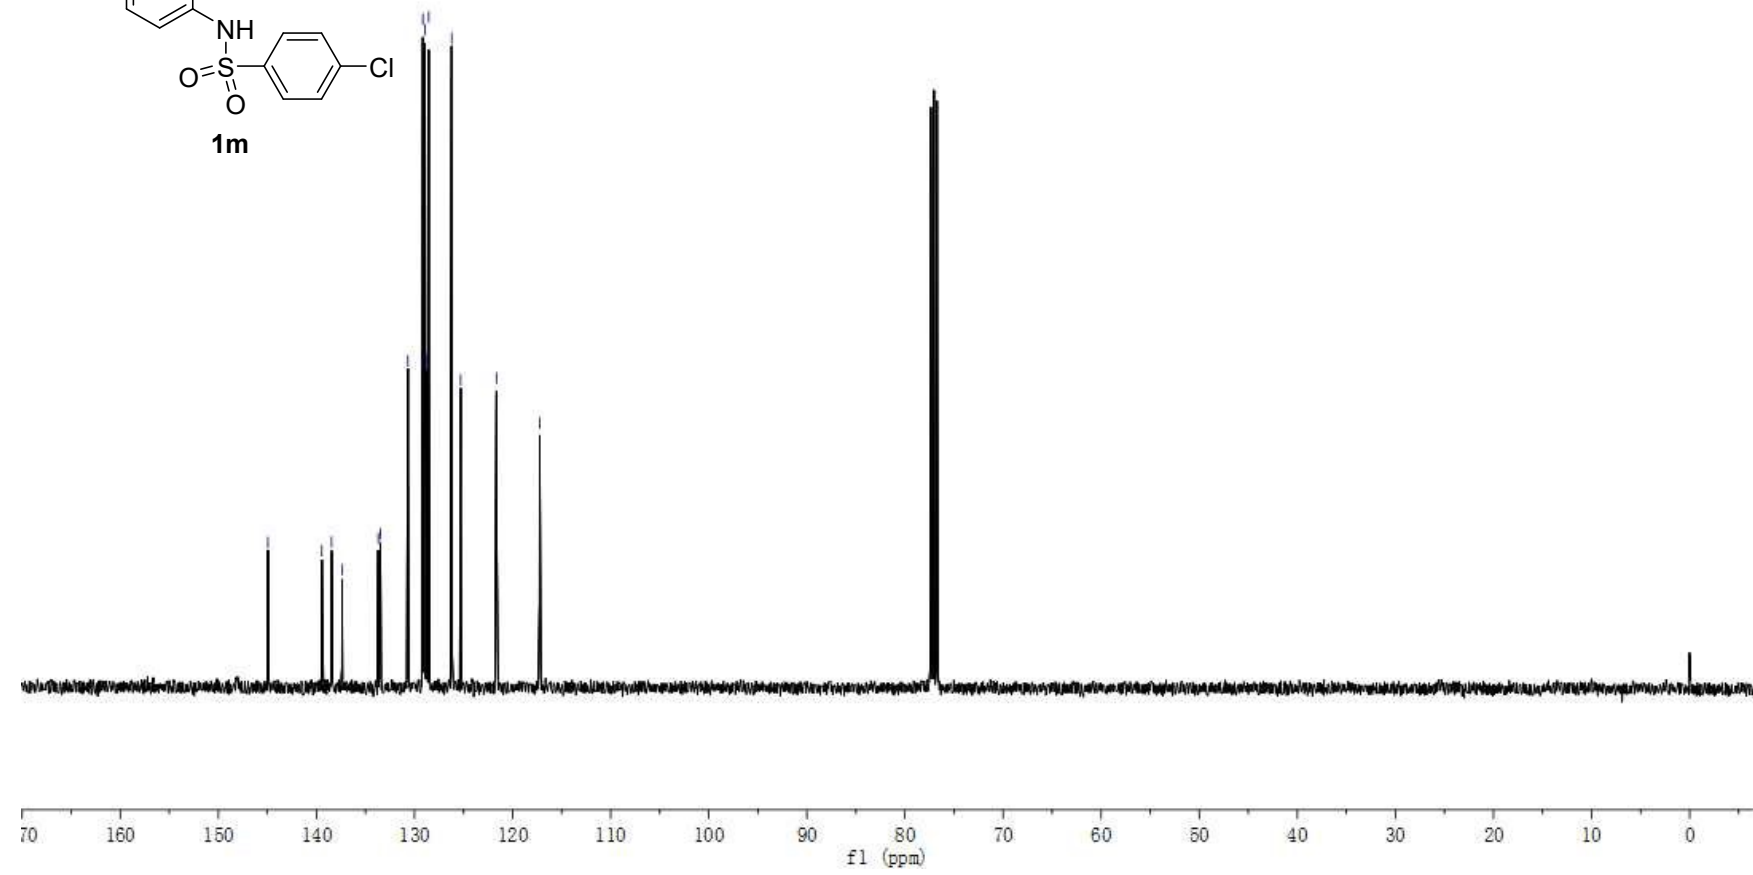

7.4341  
7.4122  
7.3762  
7.3711  
7.3541  
7.3492  
7.3139  
7.2544  
7.2386  
7.2350  
7.1639  
7.1611  
7.1206  
7.1163  
7.1163  
6.9939  
6.9761  
6.9725  
6.9408

5.7144  
5.7122

4.9383  
4.9362

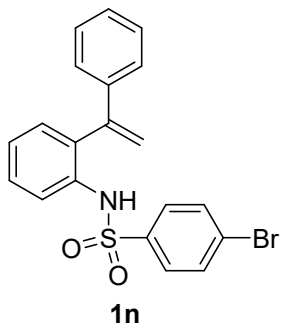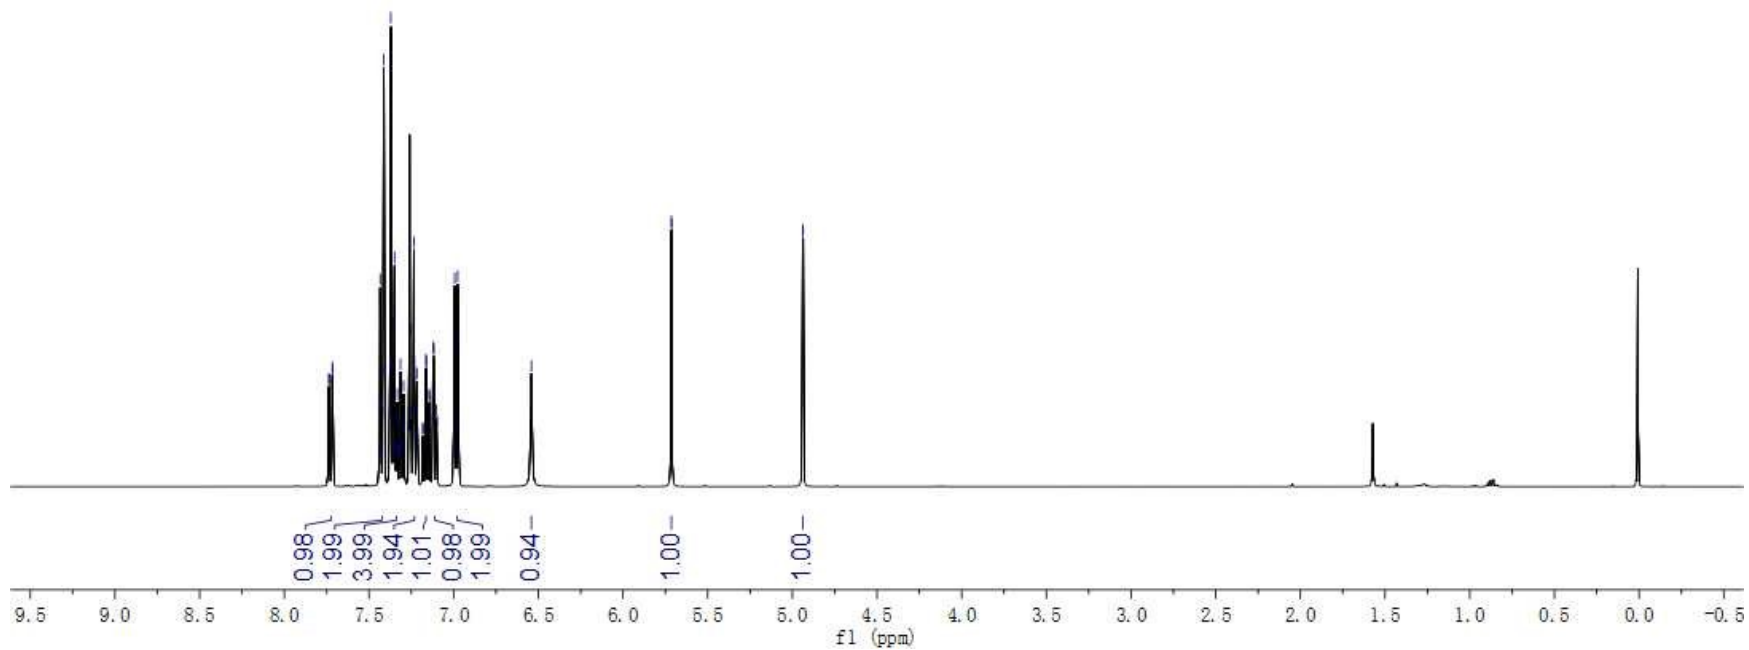

144.9305  
138.4426  
137.9032  
133.6735  
133.4814  
132.1309  
130.6816  
129.0369  
128.9390  
128.7236  
128.6205  
127.9912  
126.2063  
125.3211  
121.6502  
117.2641

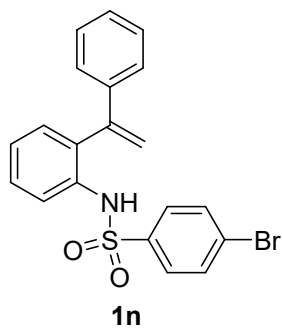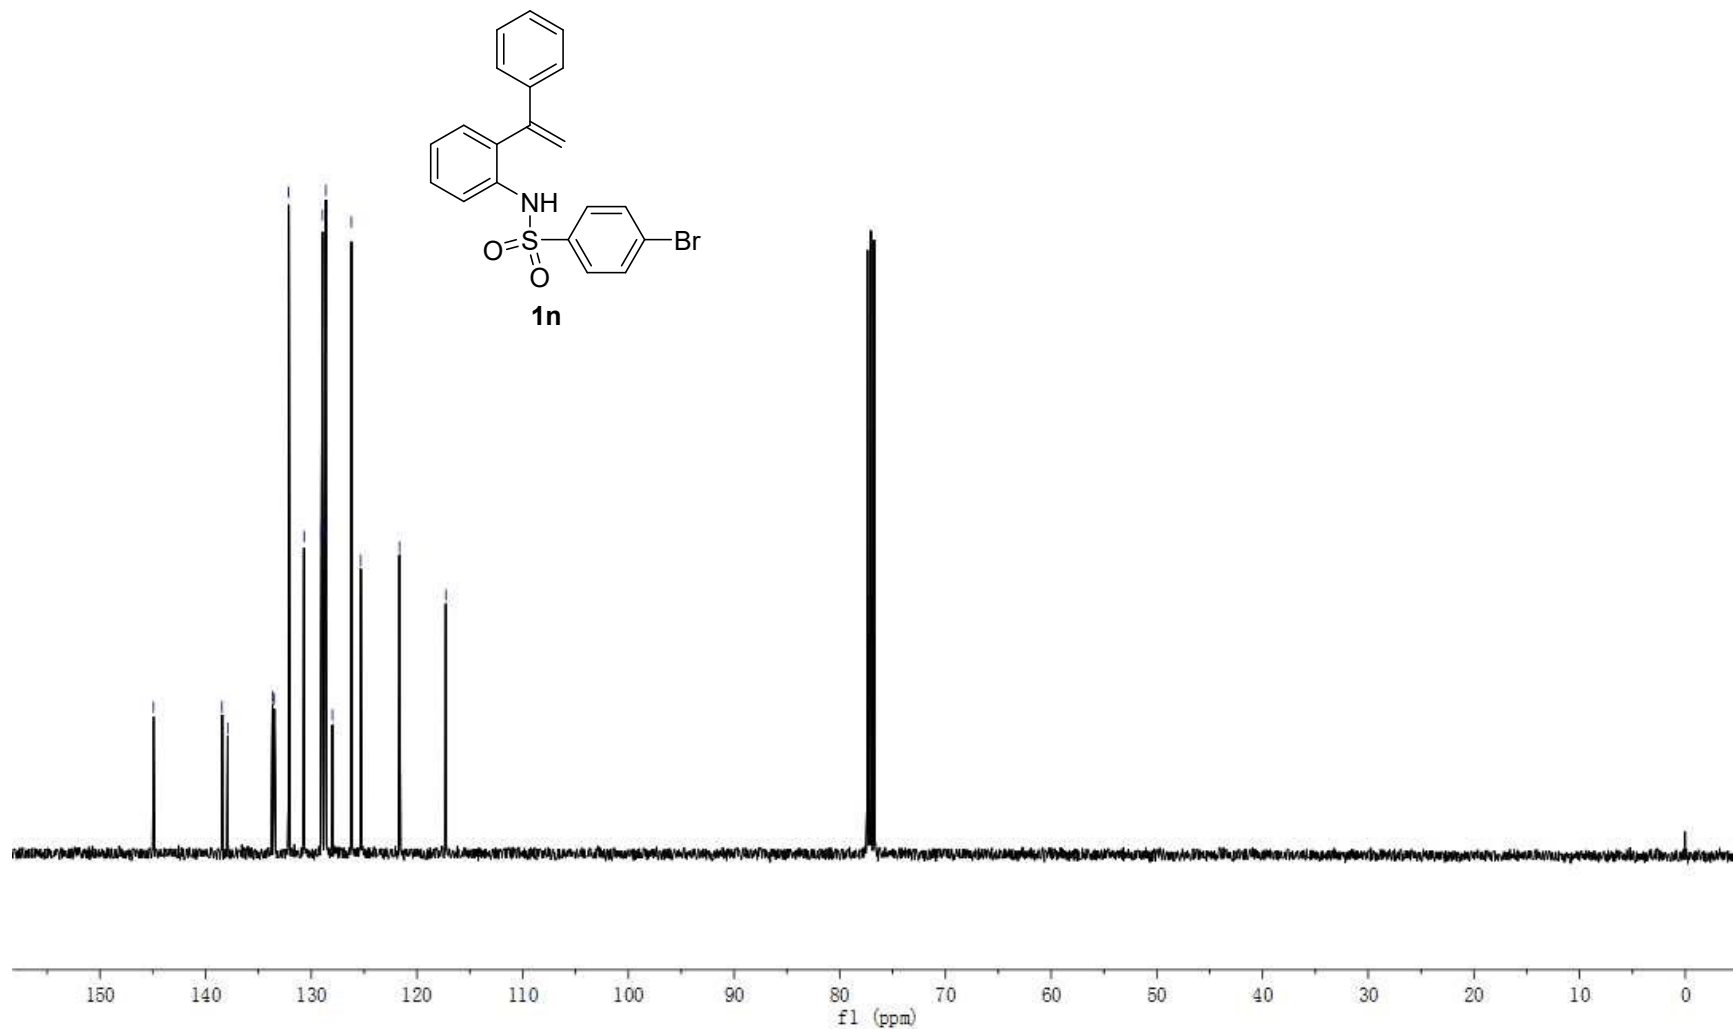

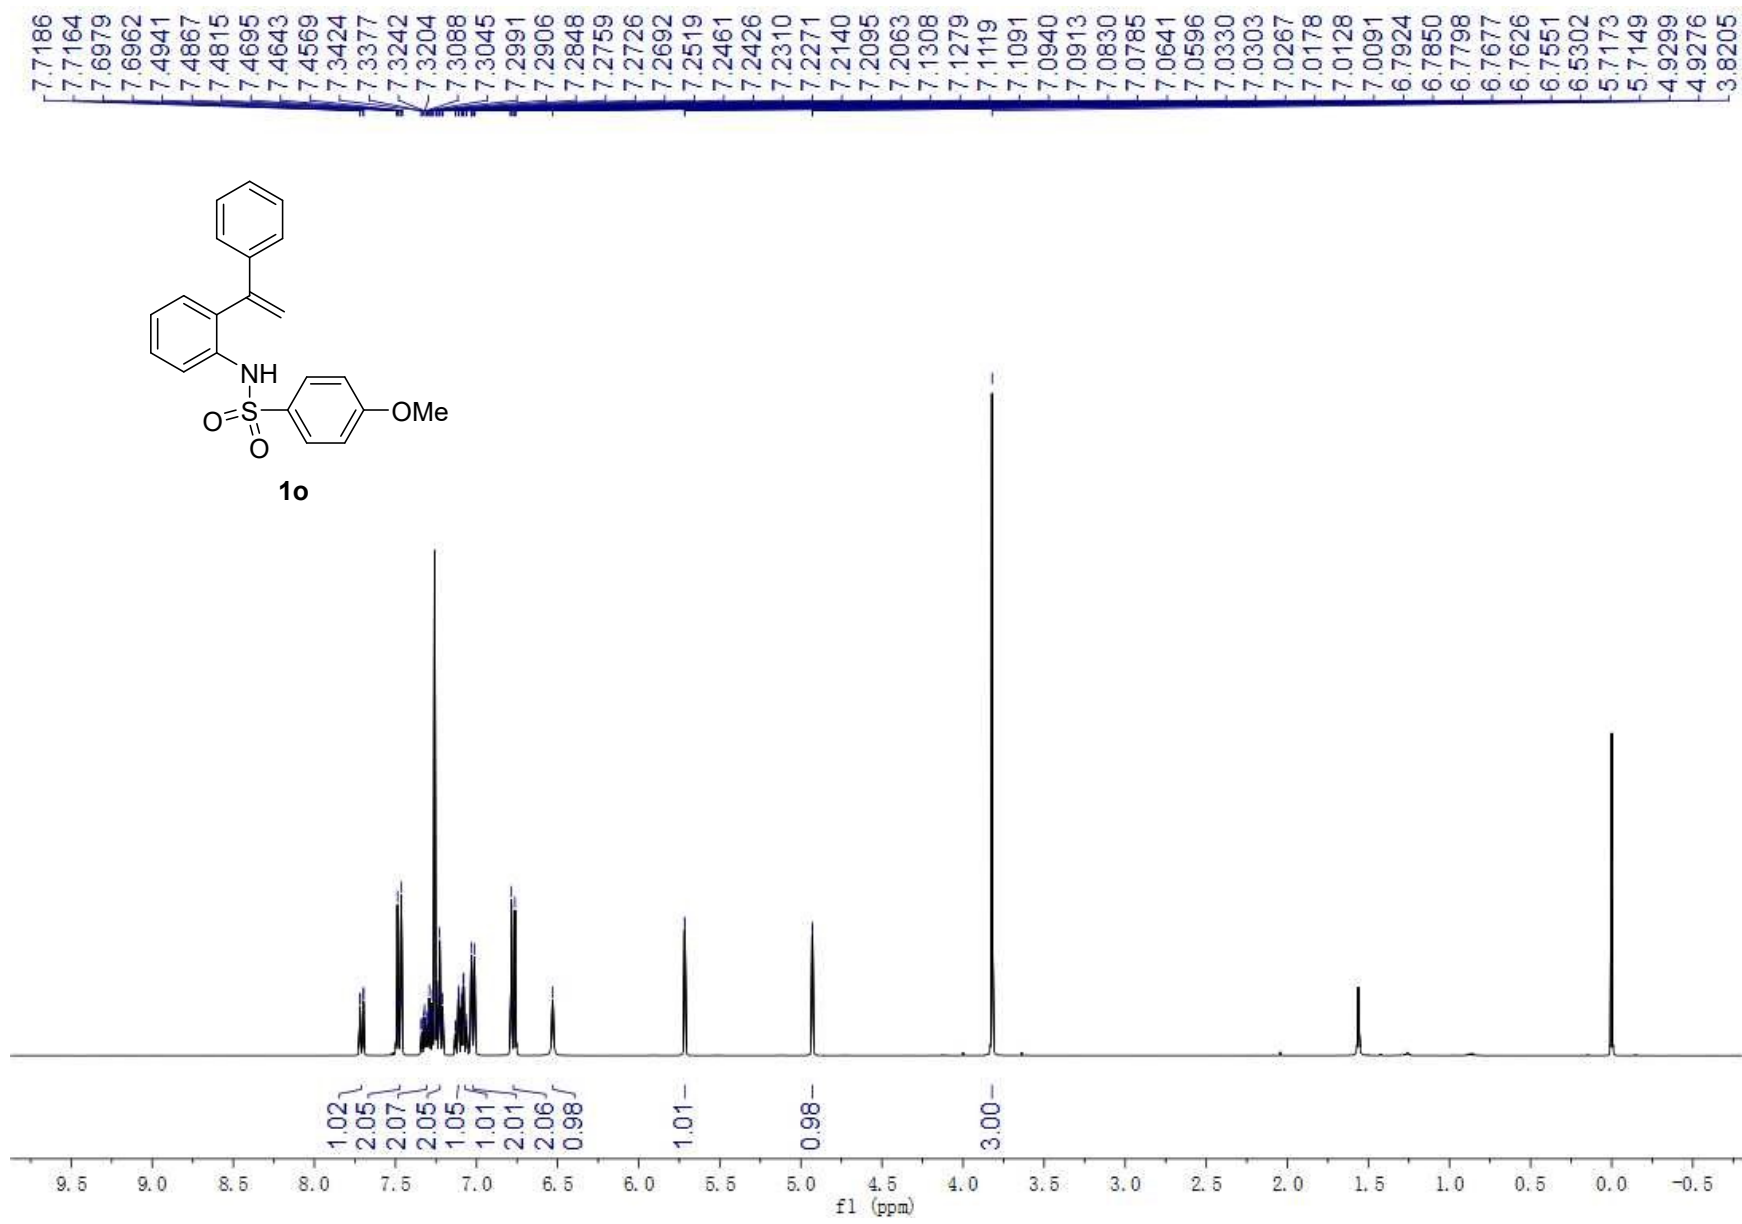

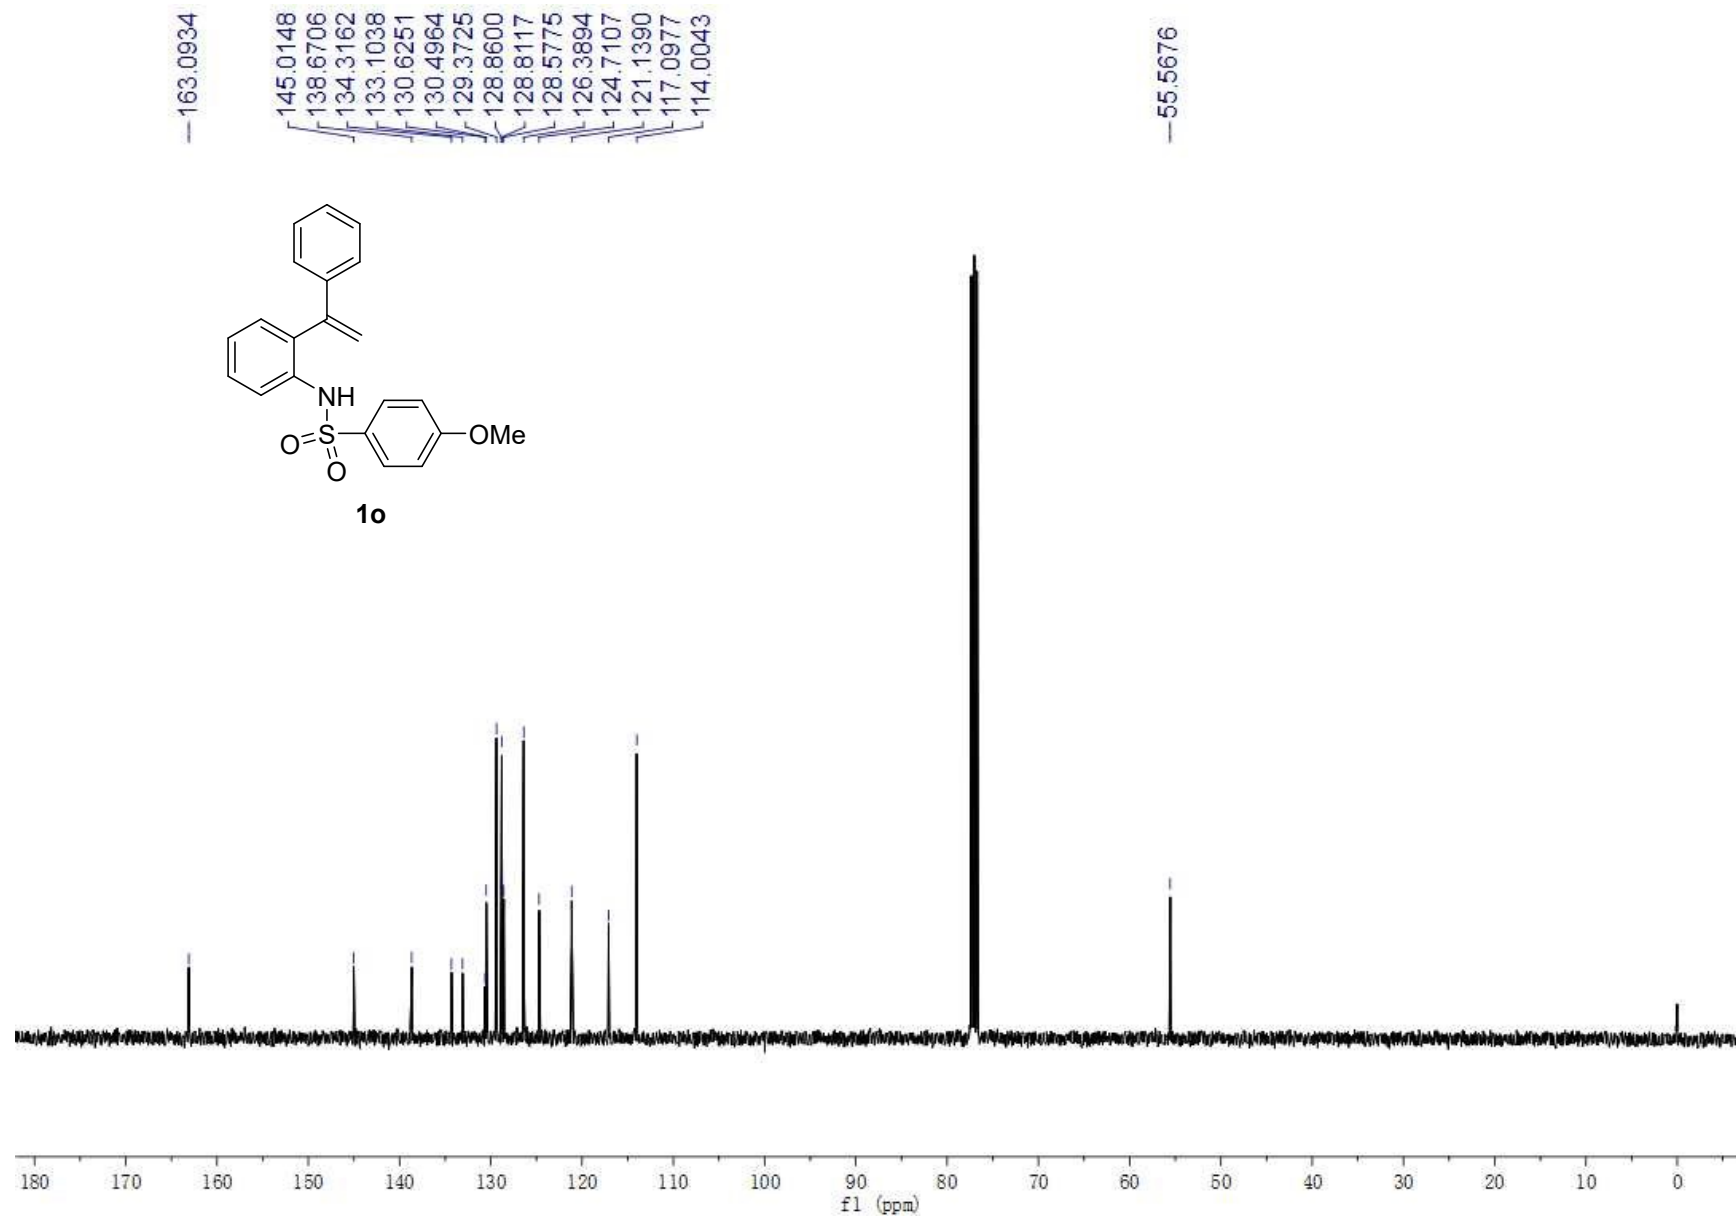

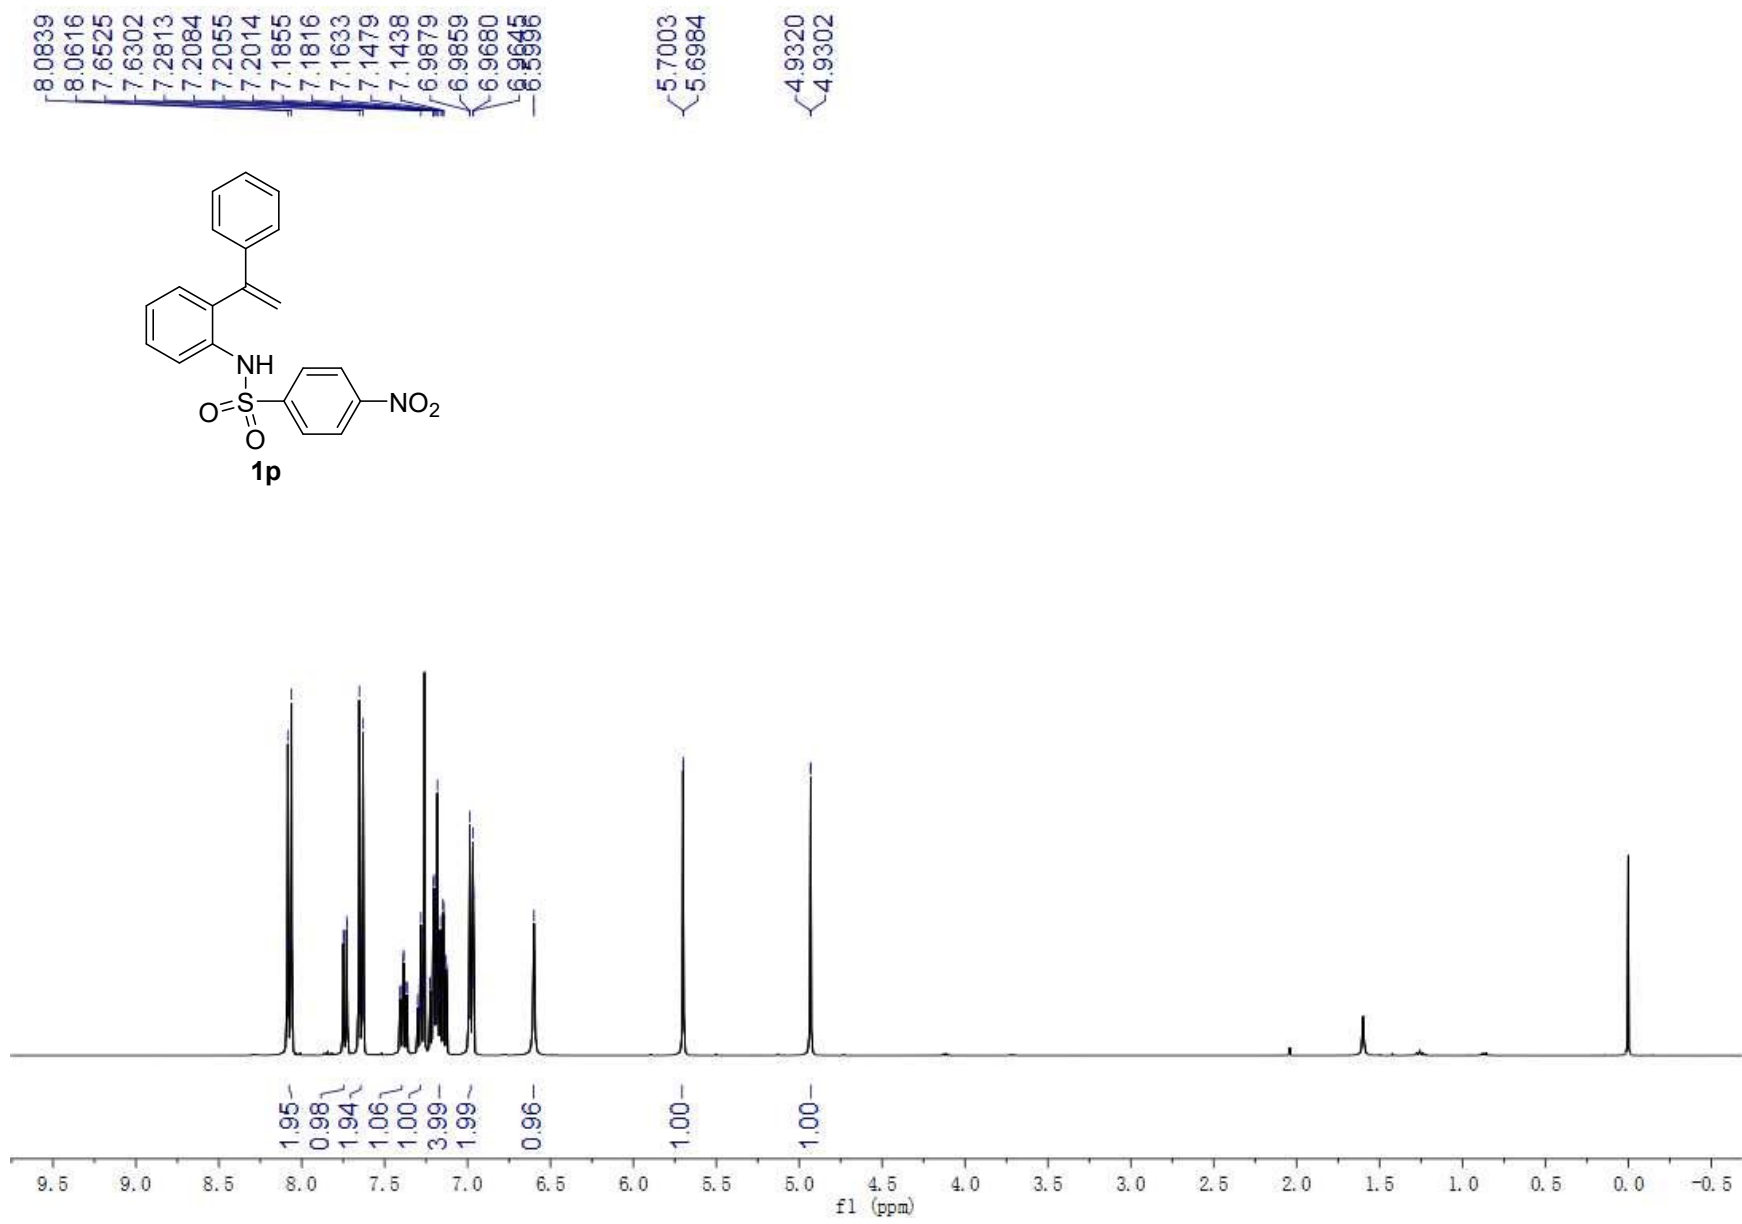



150.1079  
144.8412  
144.4608  
138.2422  
133.7326  
132.9903  
130.8448  
129.2296  
128.9390  
128.8669  
128.2640  
126.0441  
125.8961  
124.0118  
122.1687  
117.3816

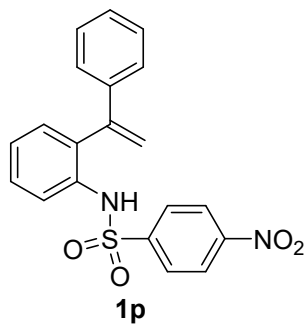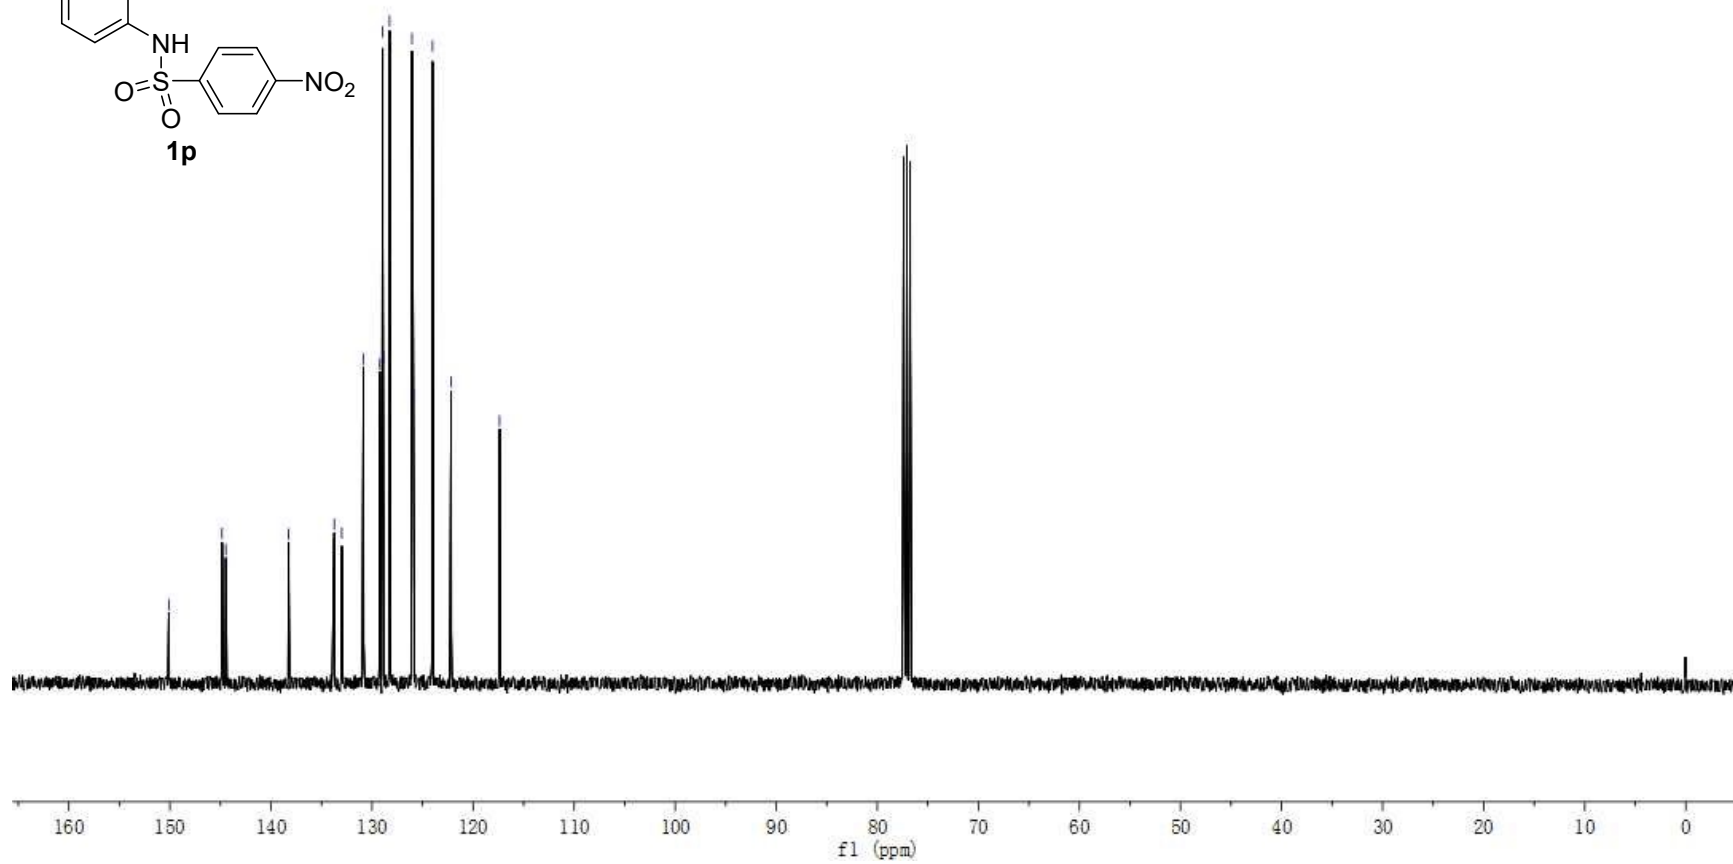

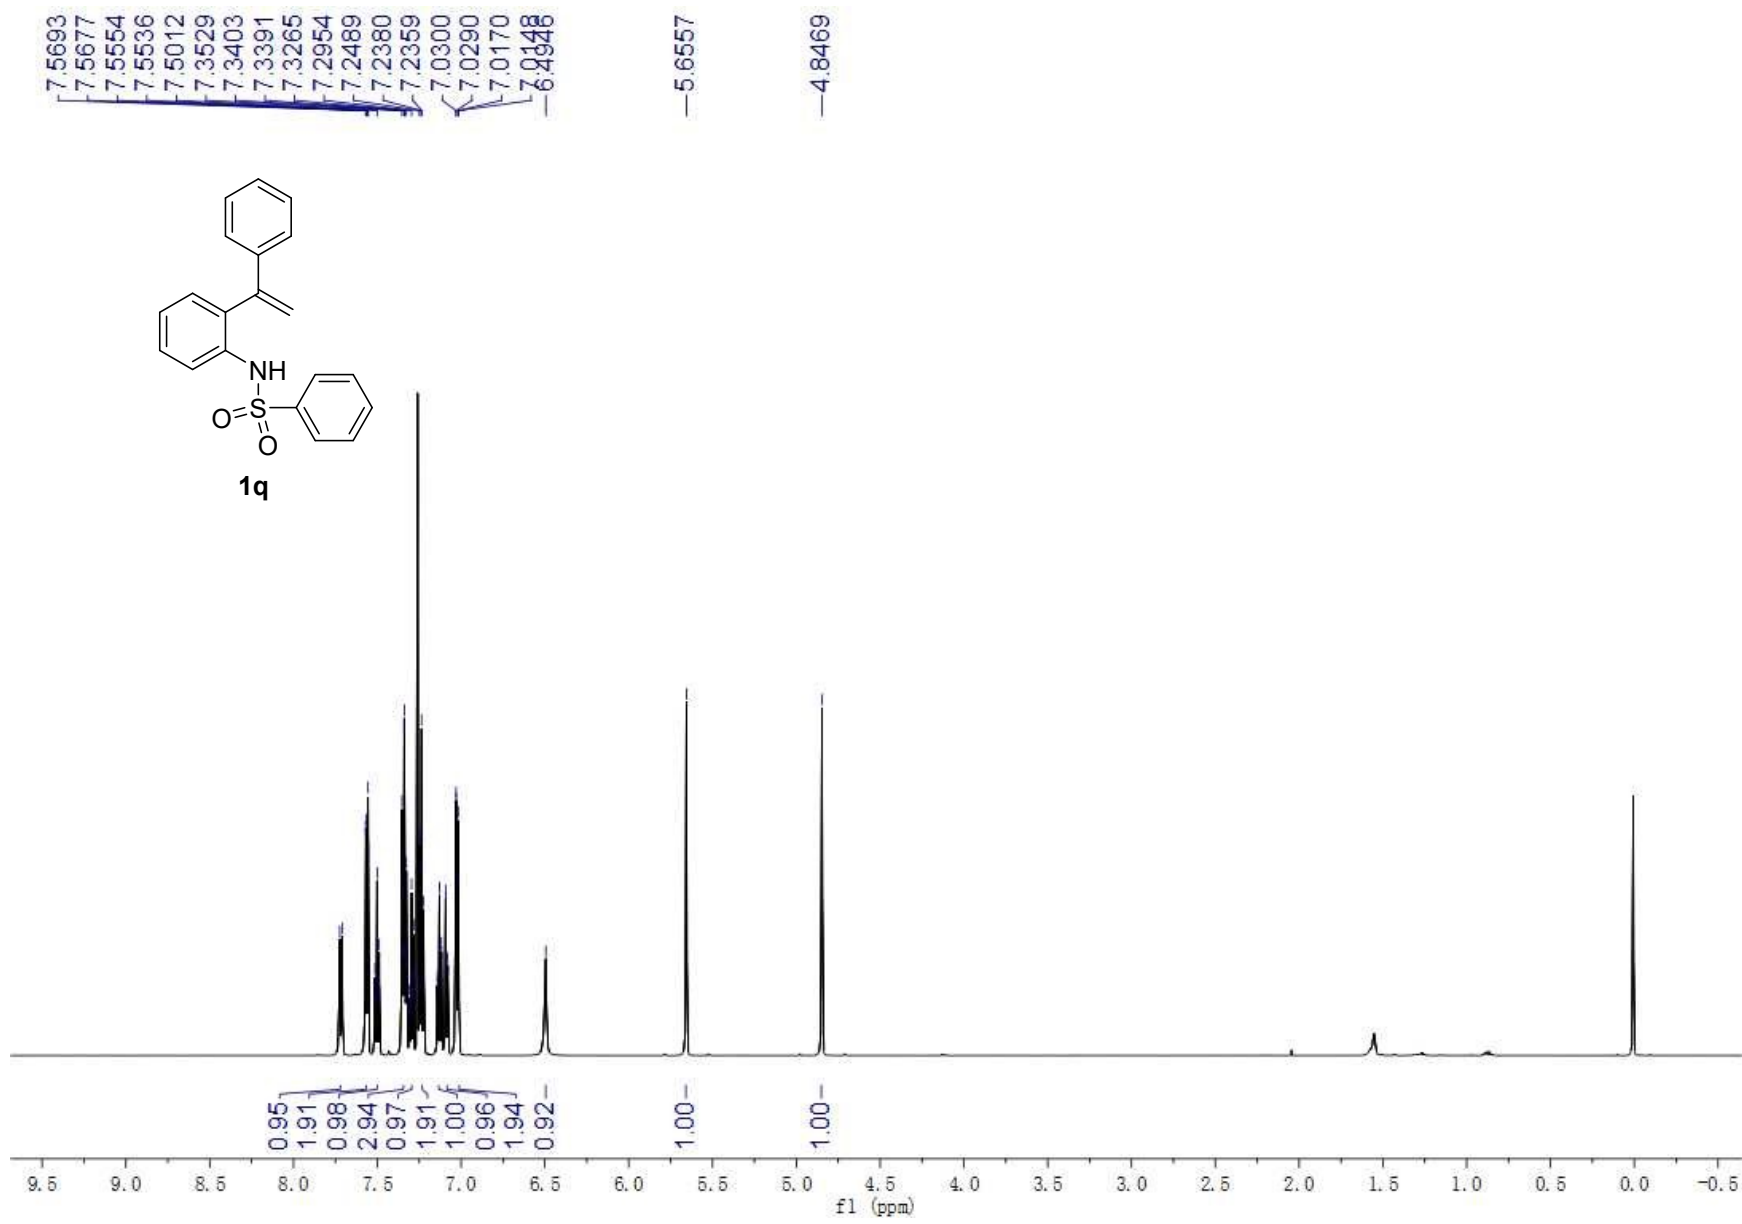

145.0364  
139.0657  
138.6443  
134.0961  
133.3553  
132.8586  
132.8454  
130.5355  
128.9103  
128.8533  
128.6486  
127.2240  
126.3355  
124.9744  
121.4124  
117.1499

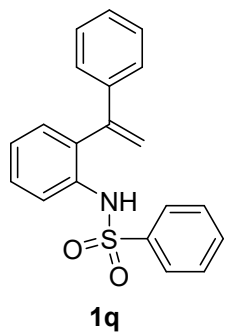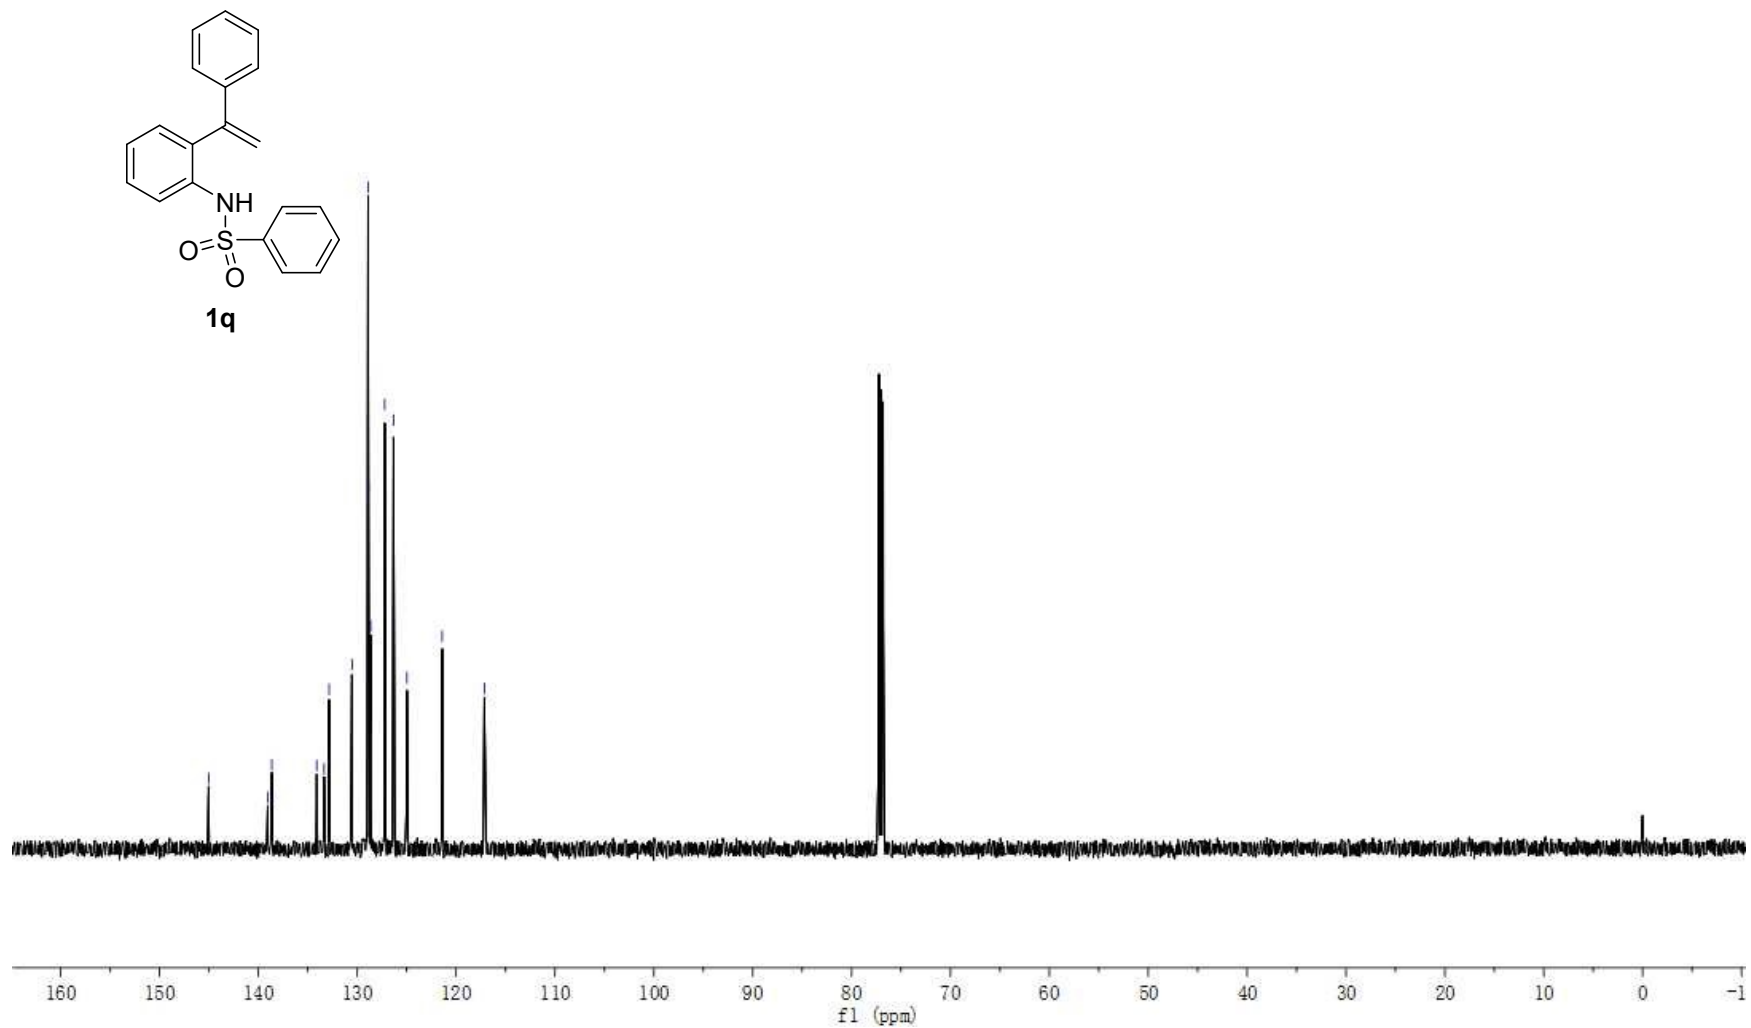

8.4271  
8.4059  
7.8588  
7.8380  
7.4834  
7.4621  
7.4478  
7.4419  
7.4265  
7.4172  
7.3989  
7.3857  
7.2797  
7.2216  
7.2007

2.3585  
2.3102

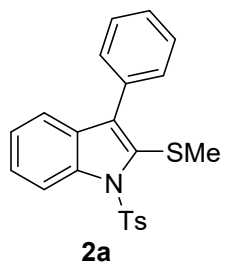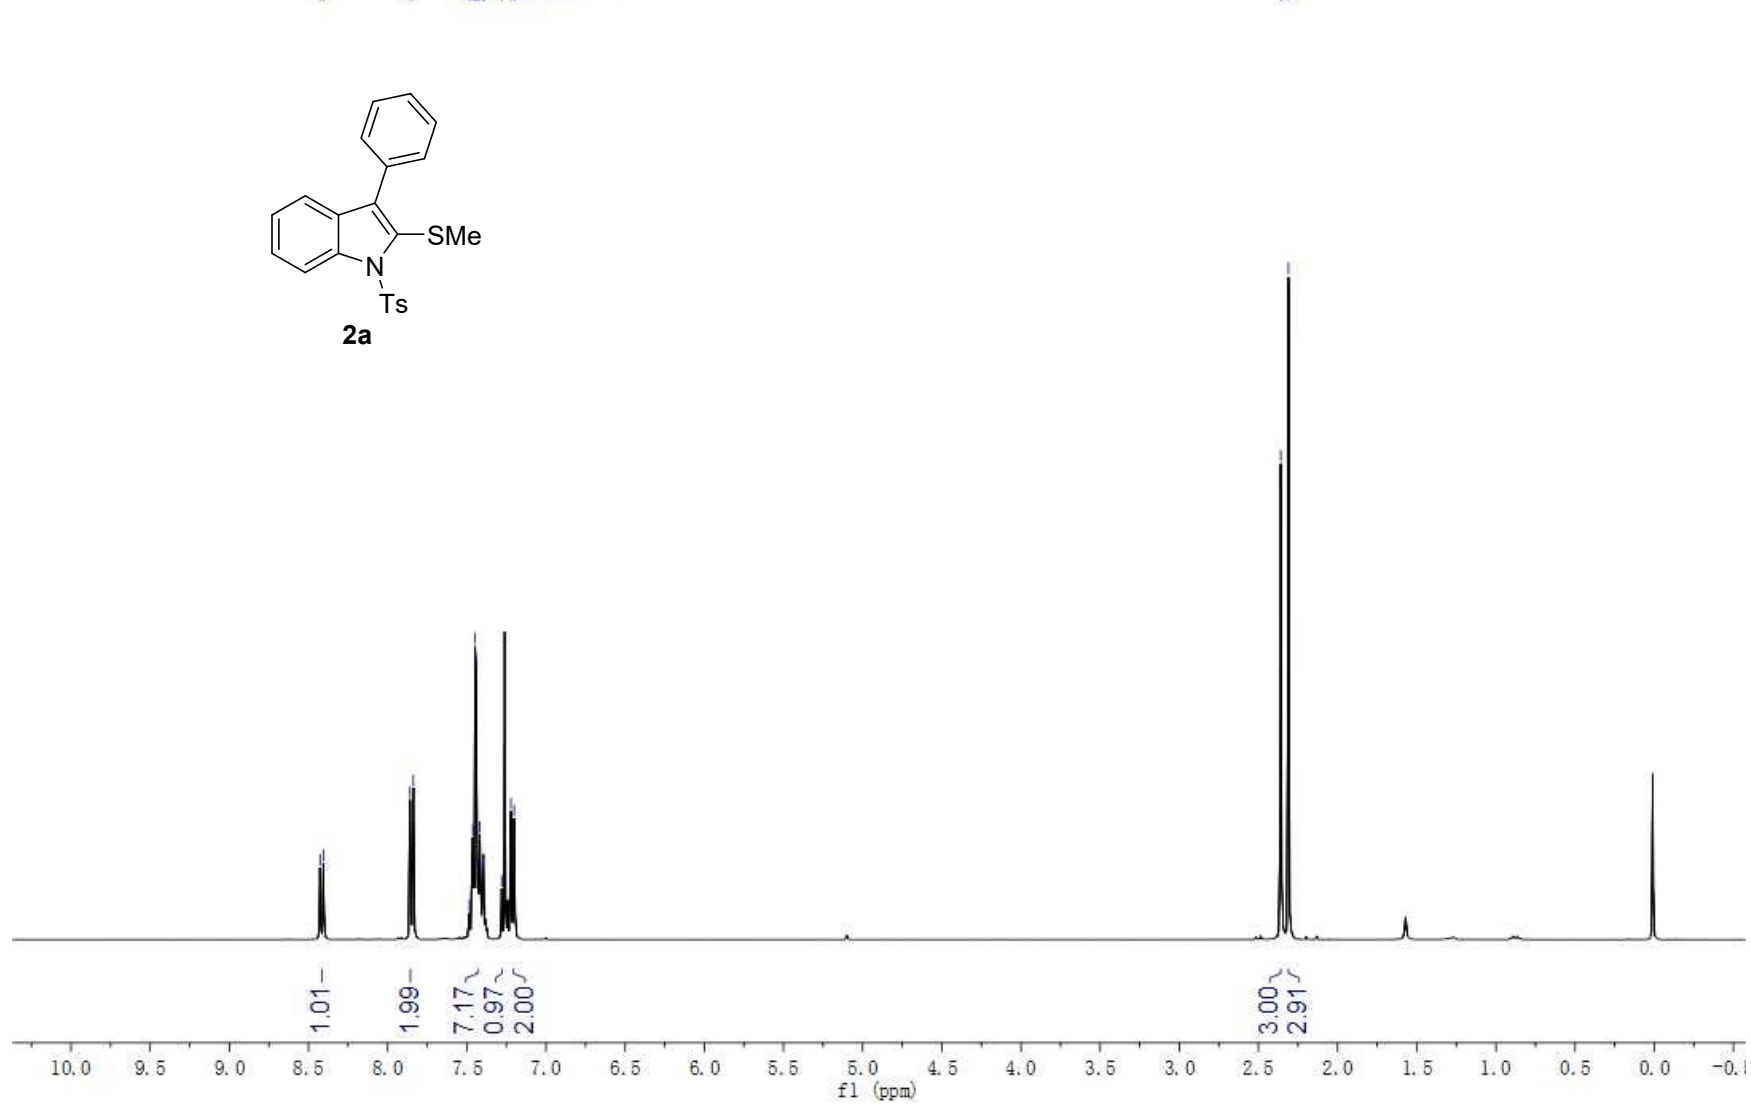

144.7798  
138.0246  
136.1116  
132.6171  
131.6127  
130.1305  
129.8309  
129.5843  
129.4990  
128.3527  
127.8625  
127.2899  
125.9410  
123.8036  
120.0637  
115.5696

21.6457  
21.3820

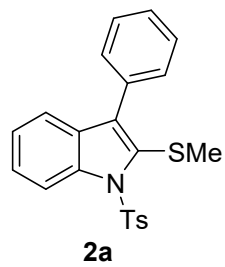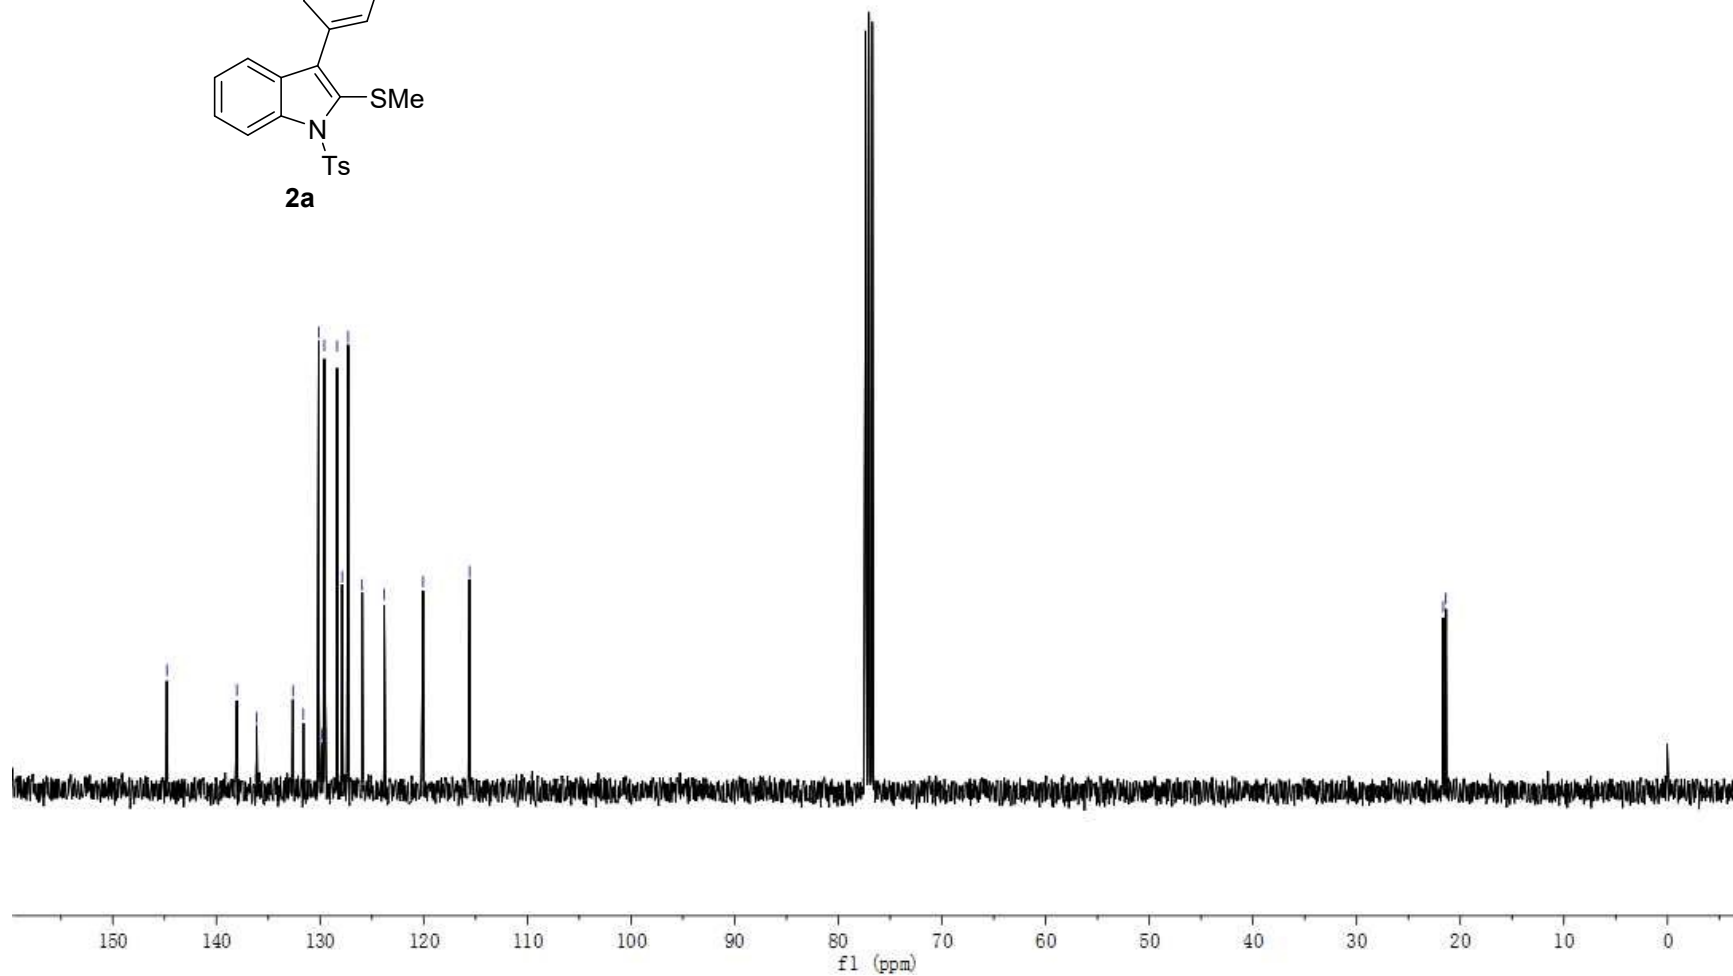

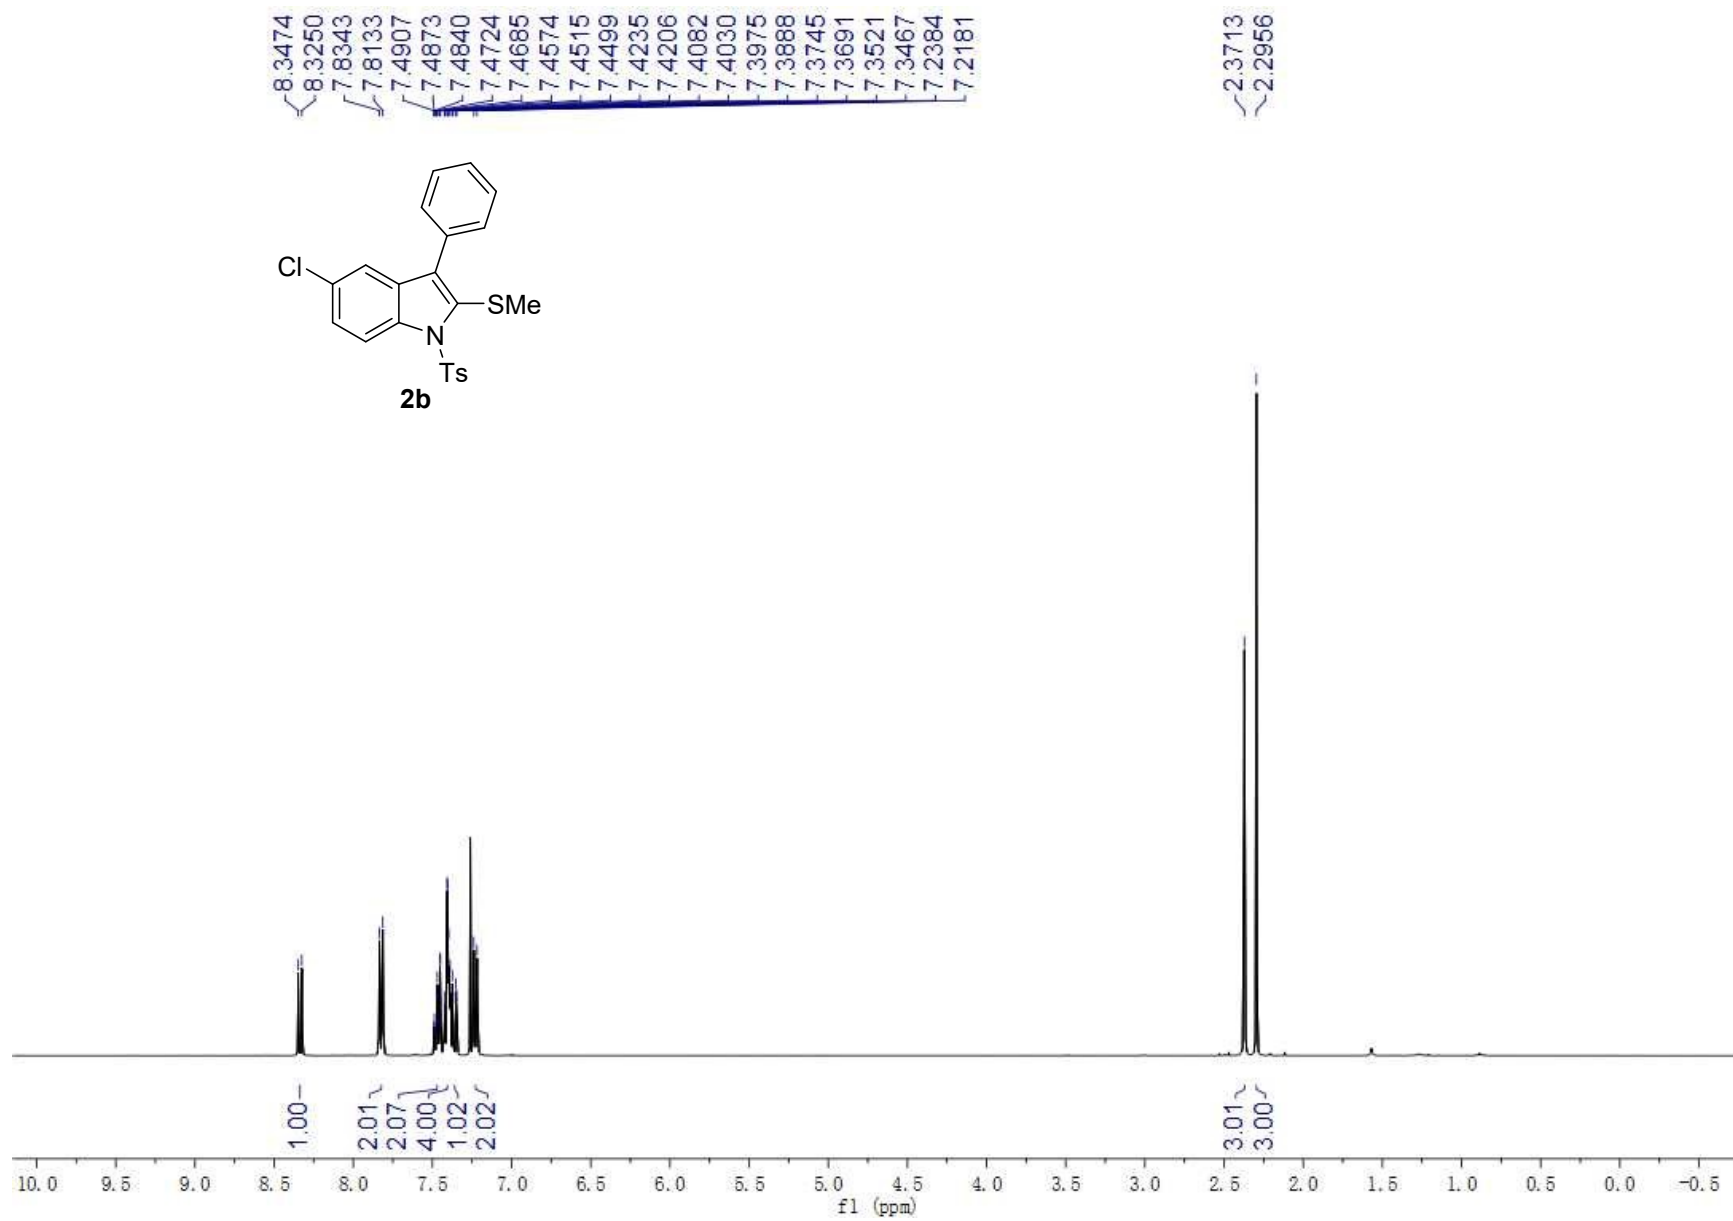

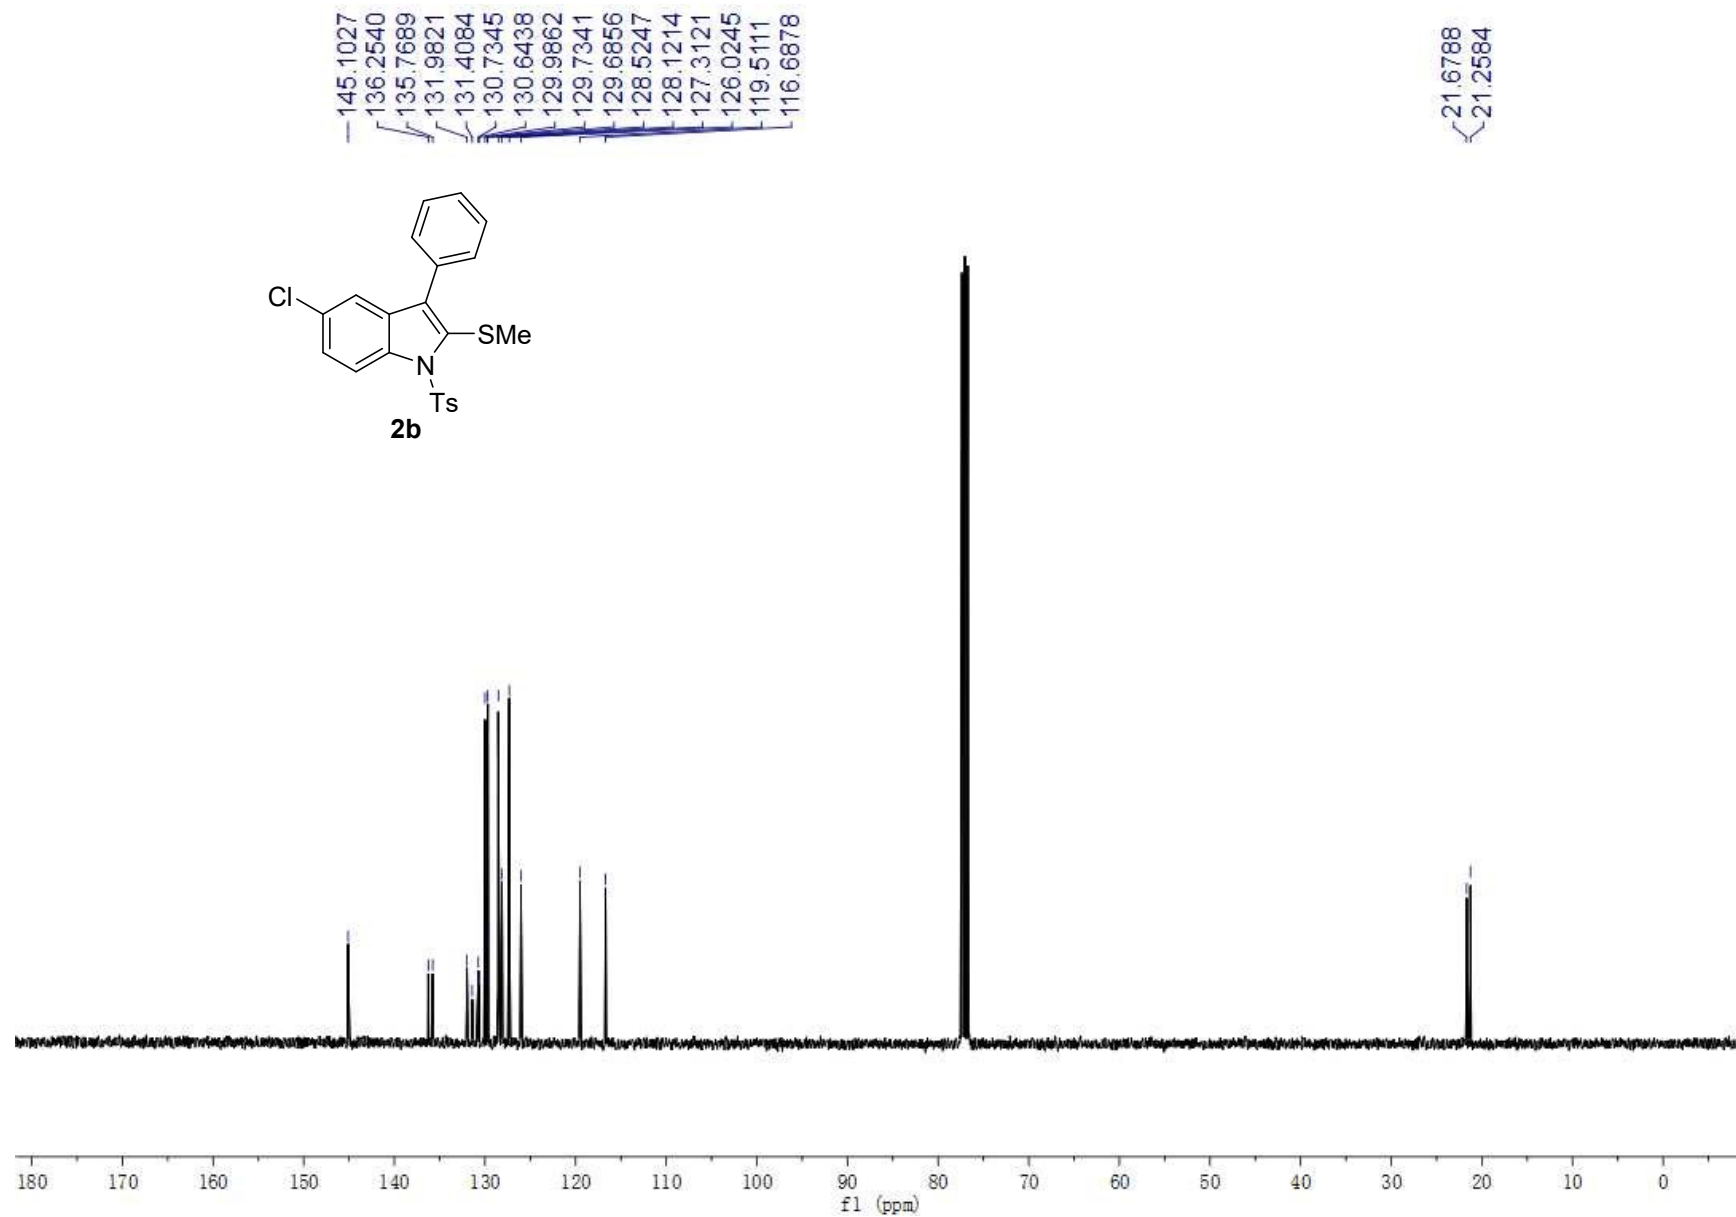

8.2937  
8.2719  
7.8311  
7.8267  
7.8144  
7.8101  
7.8051  
7.5519  
7.5477  
7.5086  
7.5035  
7.4904  
7.4862  
7.4811  
7.4743  
7.4700  
7.4668  
7.4549  
7.4512  
7.4492  
7.4461  
7.4285  
7.4241  
7.4207  
7.4063  
7.4041  
7.3999  
7.3877  
7.3839  
7.3803  
7.2379  
2.3178  
2.2901

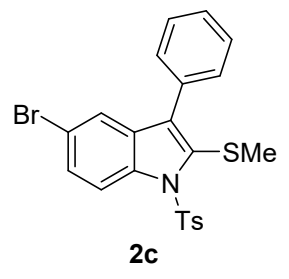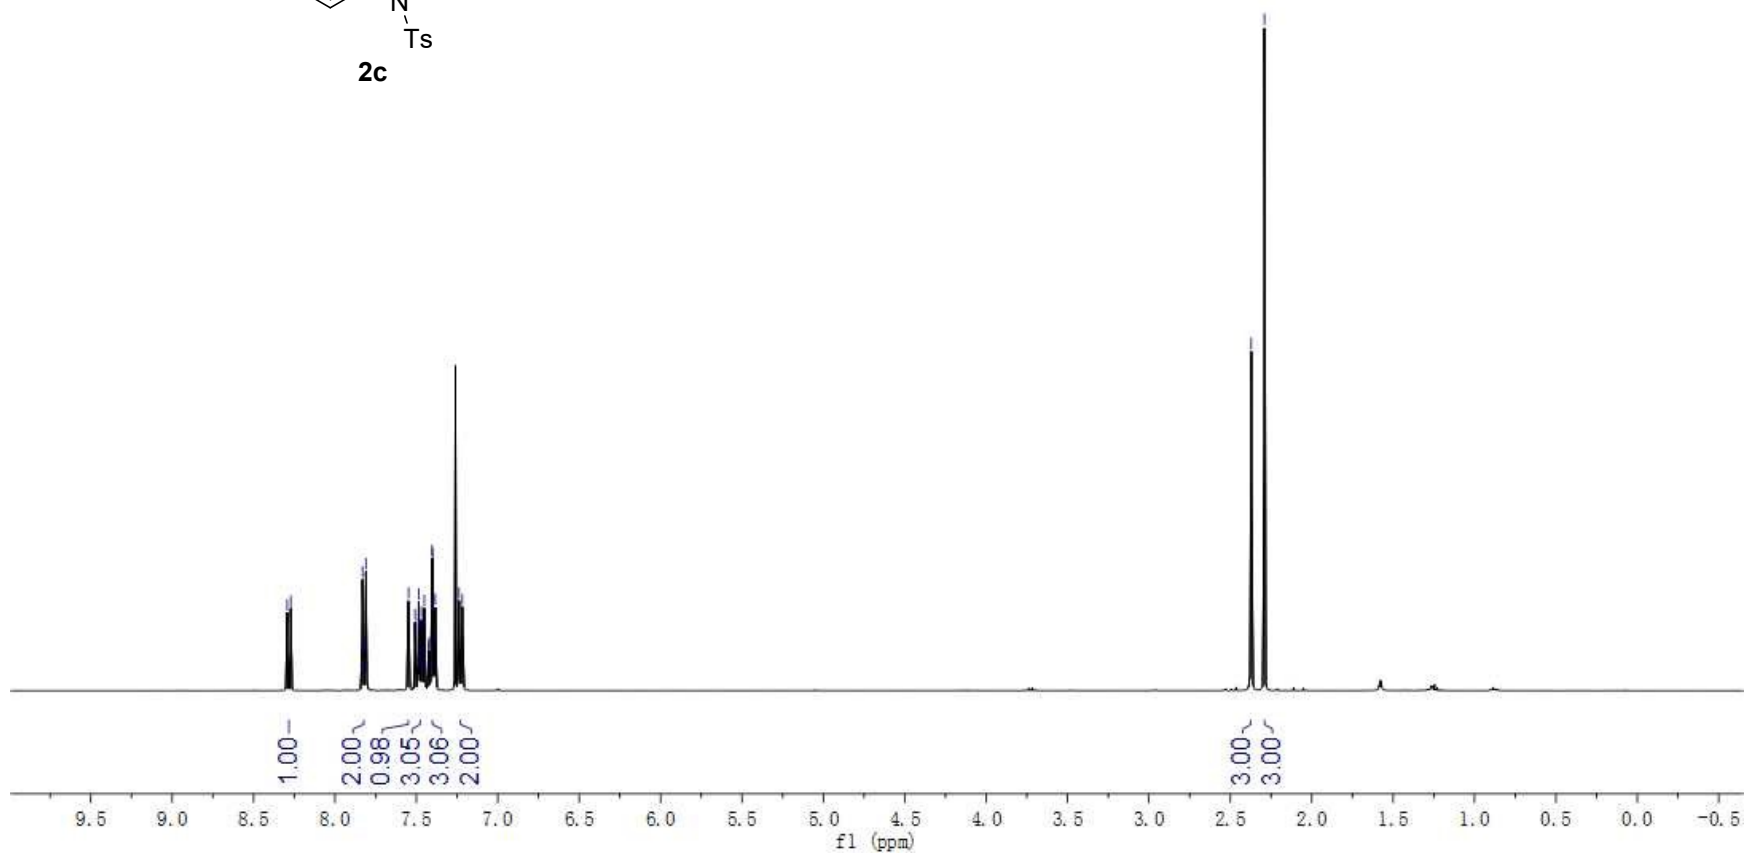



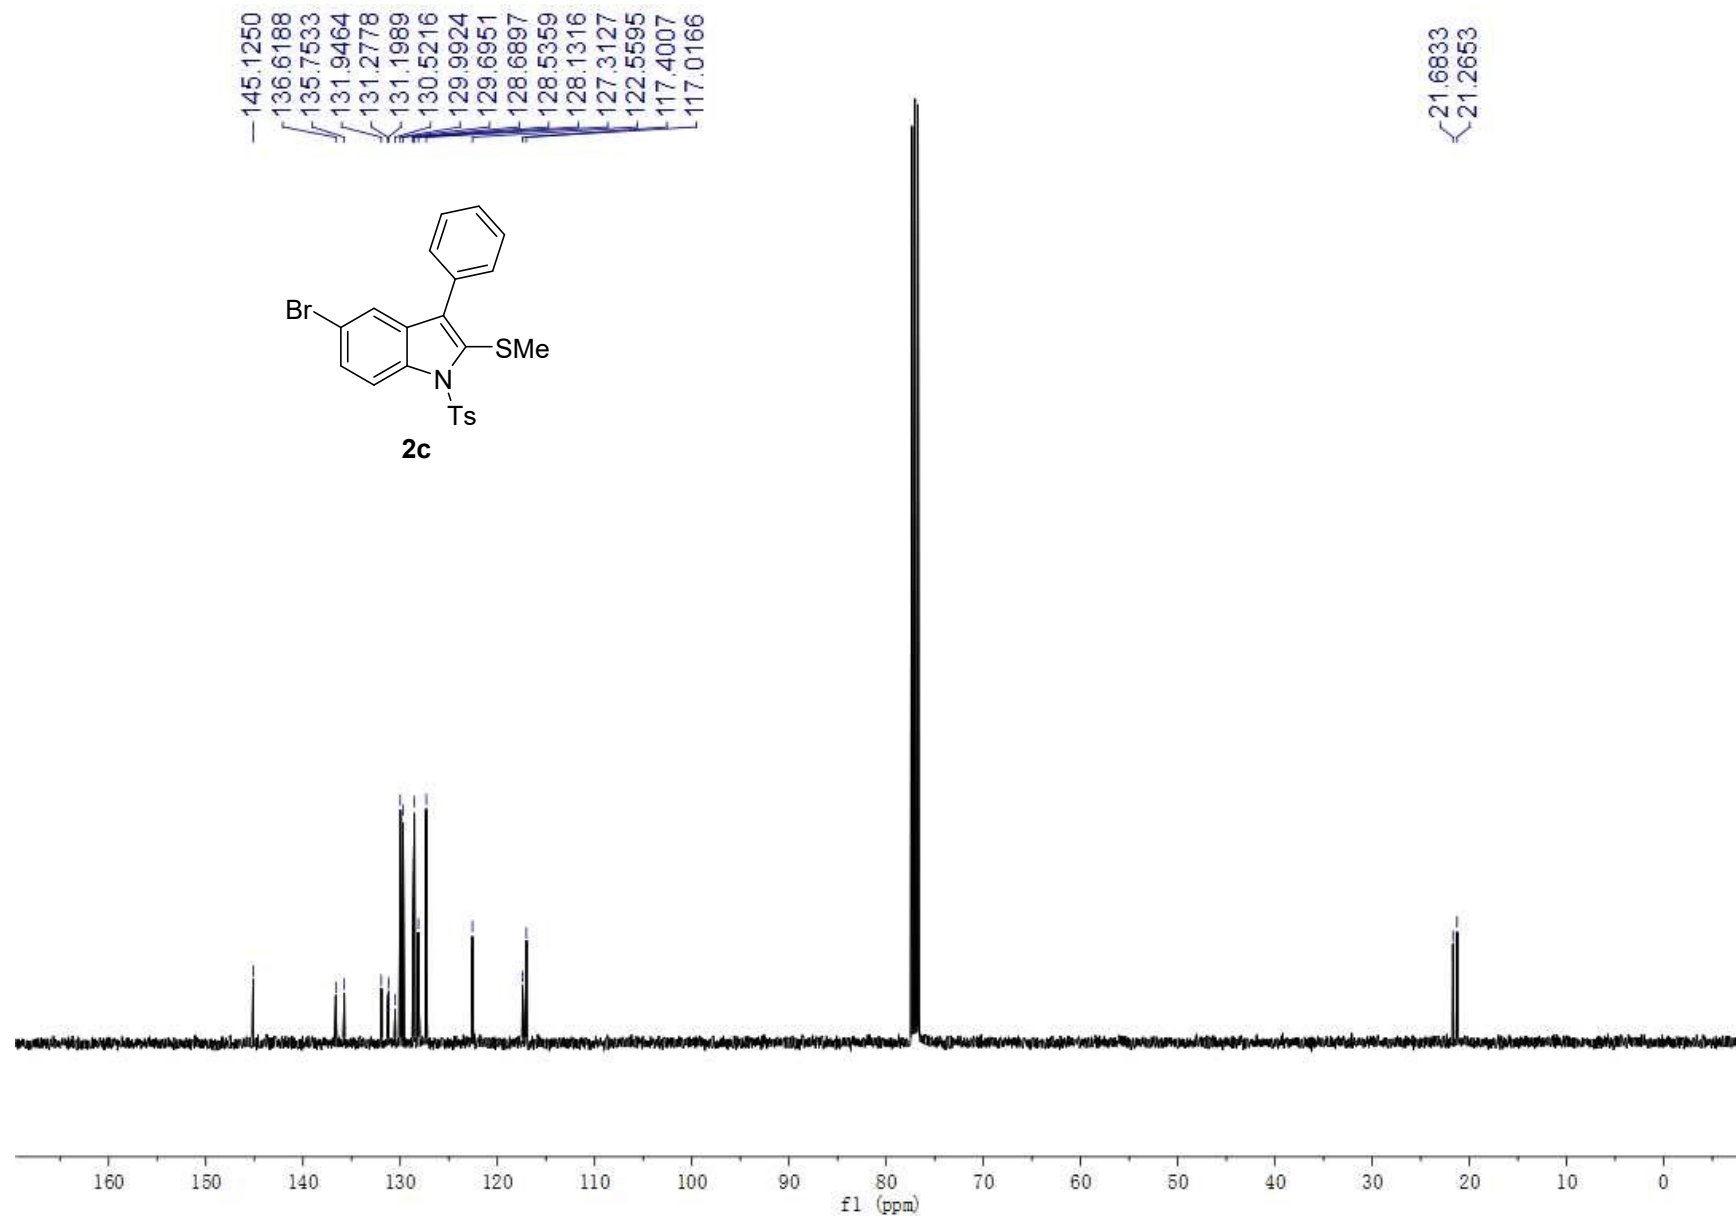

8.2336  
7.8471  
7.8262  
7.4679  
7.4569  
7.4534  
7.4507  
7.4351  
7.4295  
7.4135  
7.4045  
7.4004  
7.3830  
7.3723  
7.3360  
7.3158  
7.2227  
7.2023  
7.1032  
7.0847

2.5408  
2.3610  
2.2902

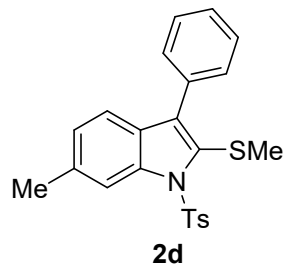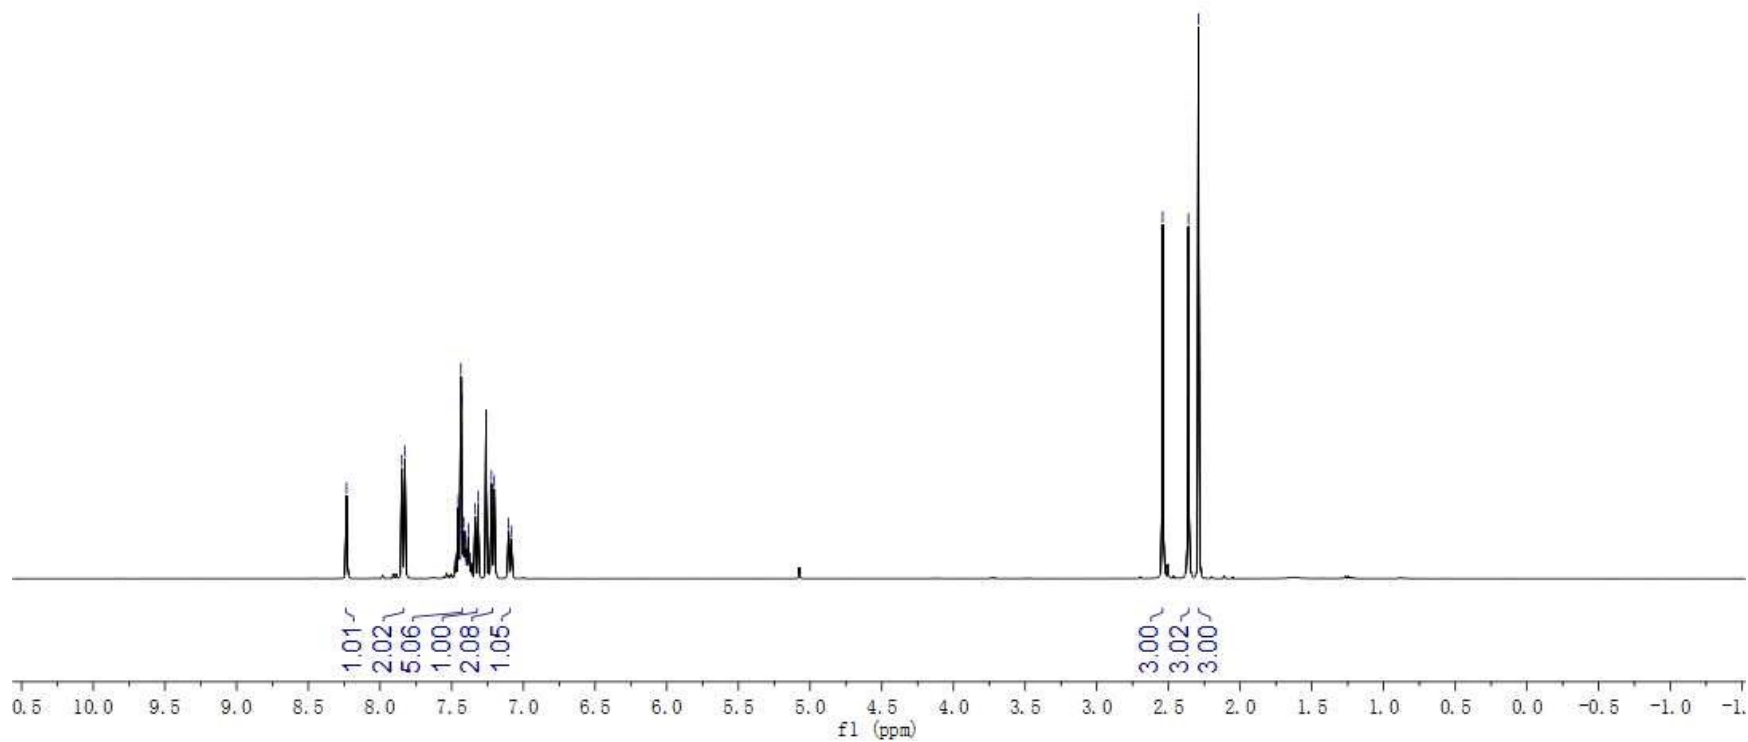

144.6753  
138.4279  
136.2448  
132.7658  
131.7136  
130.0879  
129.7658  
129.5620  
128.8463  
128.3104  
127.7908  
127.2661  
127.0873  
125.3077  
119.6828  
115.6188

22.1834  
21.6551  
21.4554

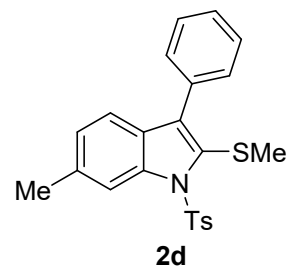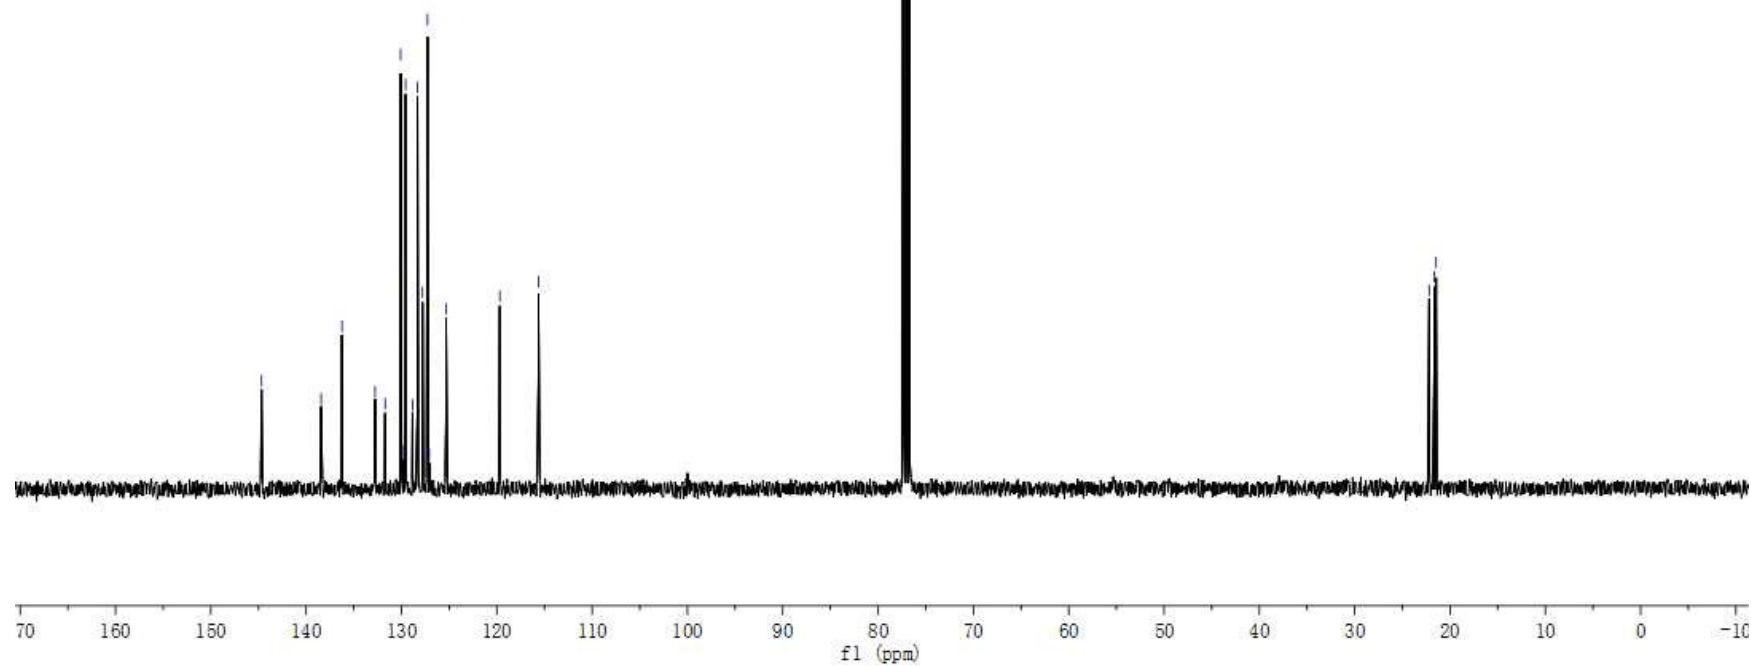

8.7156  
7.8636  
7.8496  
7.5402  
7.5263  
7.4991  
7.4854  
7.4716  
7.4662  
7.4607  
7.4253  
7.4207  
7.4147  
7.4130  
7.2576  
7.2416

2.3785  
2.2700

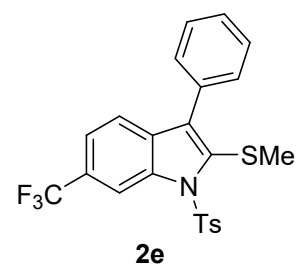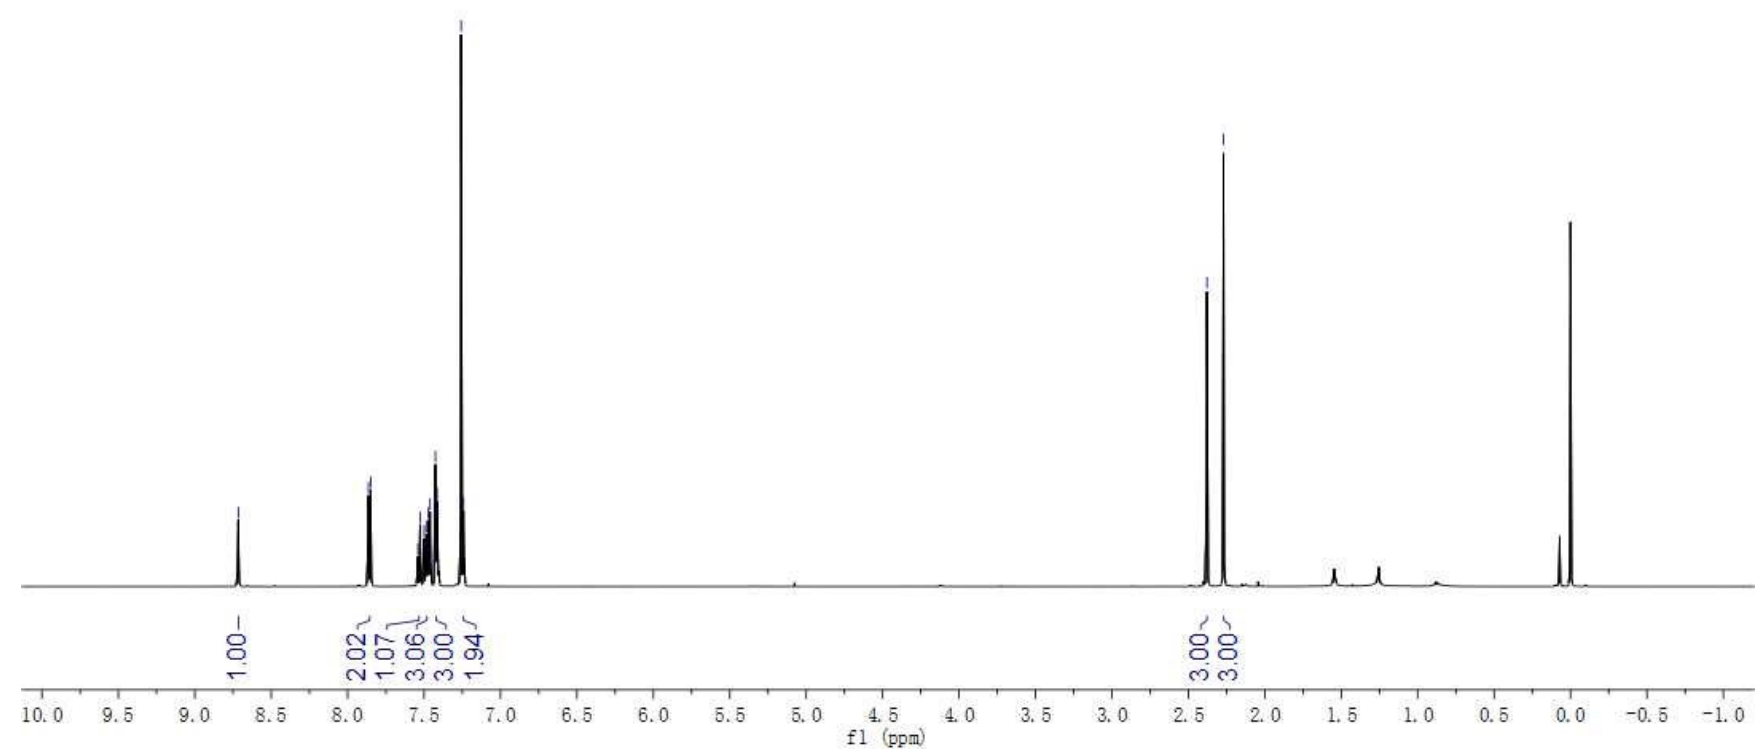

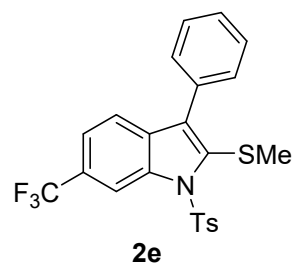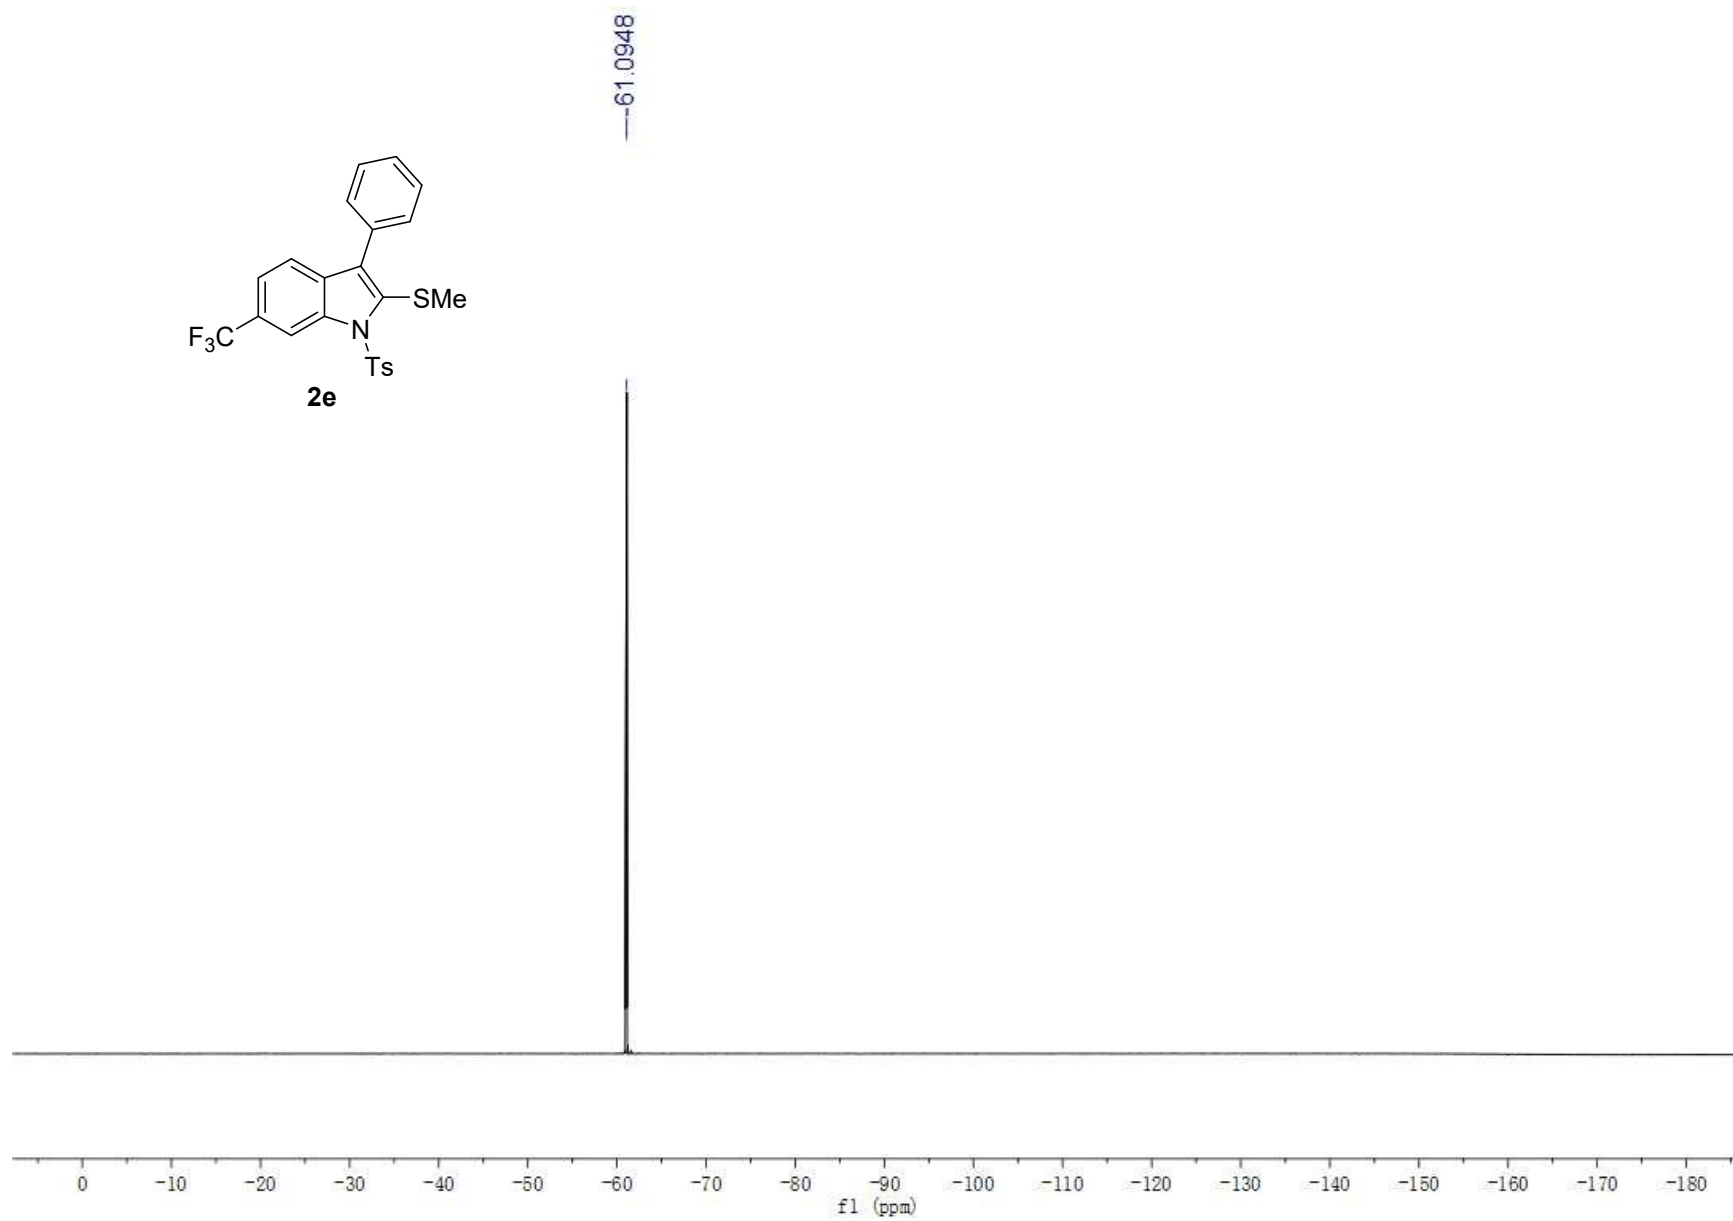

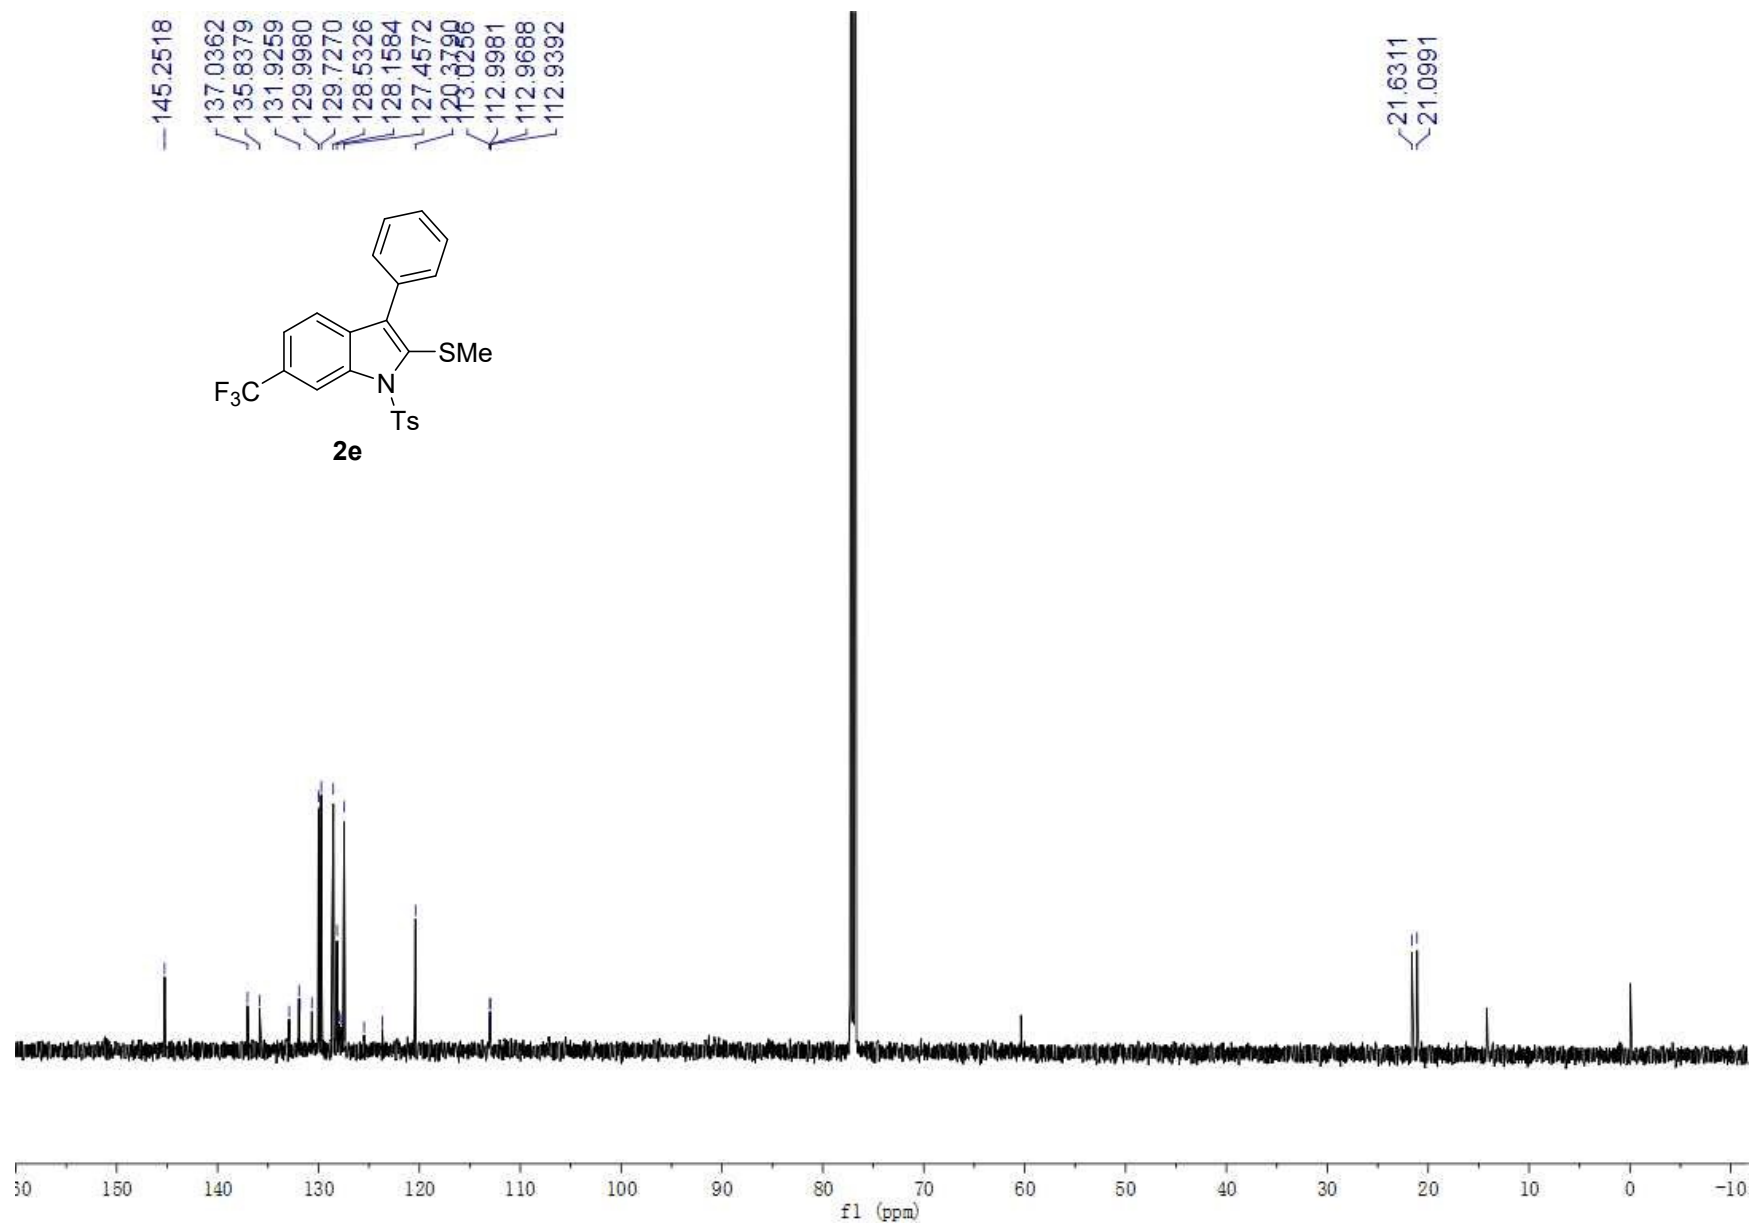

8.4258  
8.4118  
7.8550  
7.8412  
7.4415  
7.4290  
7.4151  
7.4032  
7.2873  
7.2748  
7.2276  
7.2136  
7.1661  
7.1498  
7.1088  
7.1053  
7.0949  
7.0911  
7.0811  
7.0770

2.3655  
2.3128

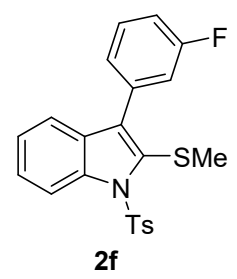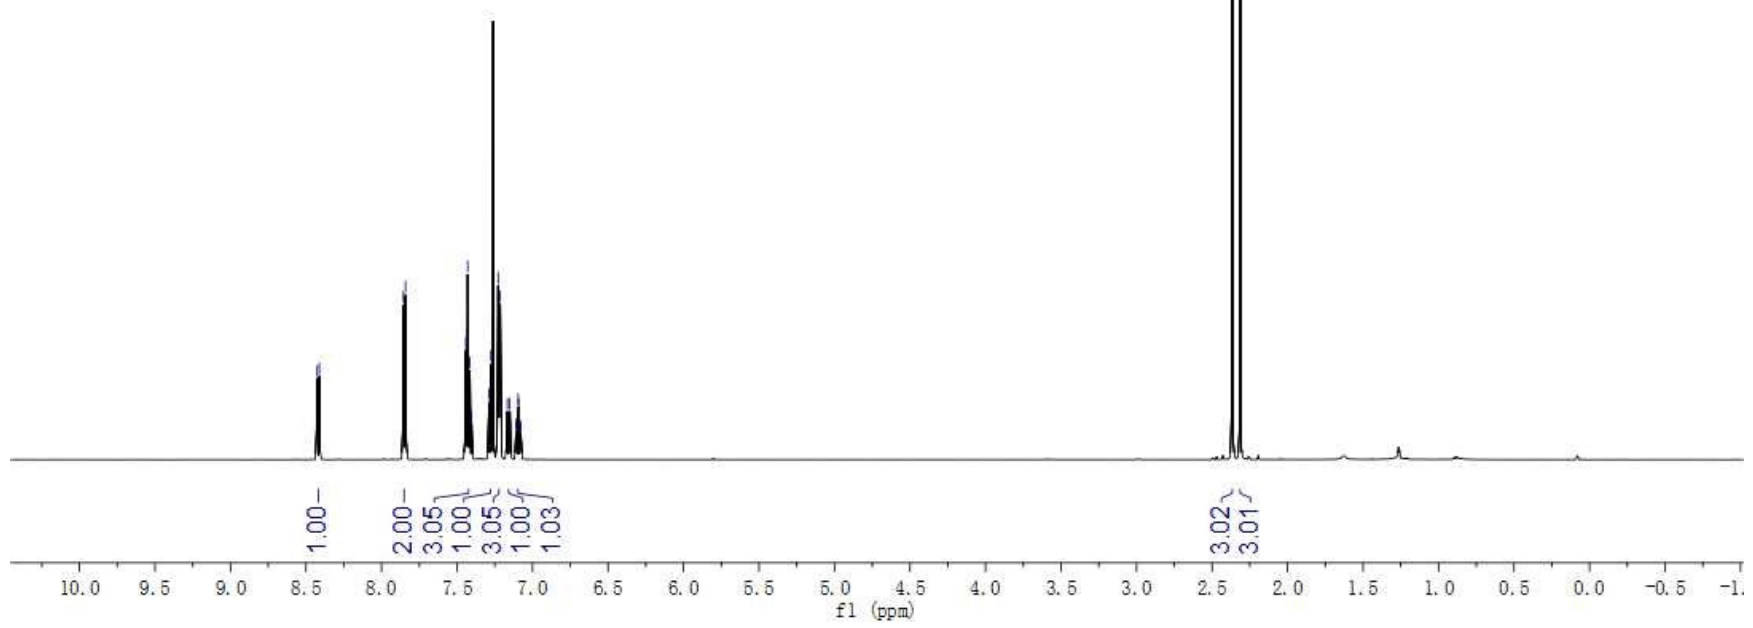

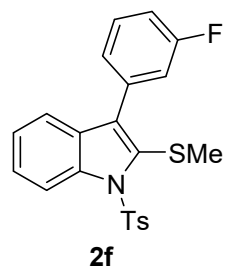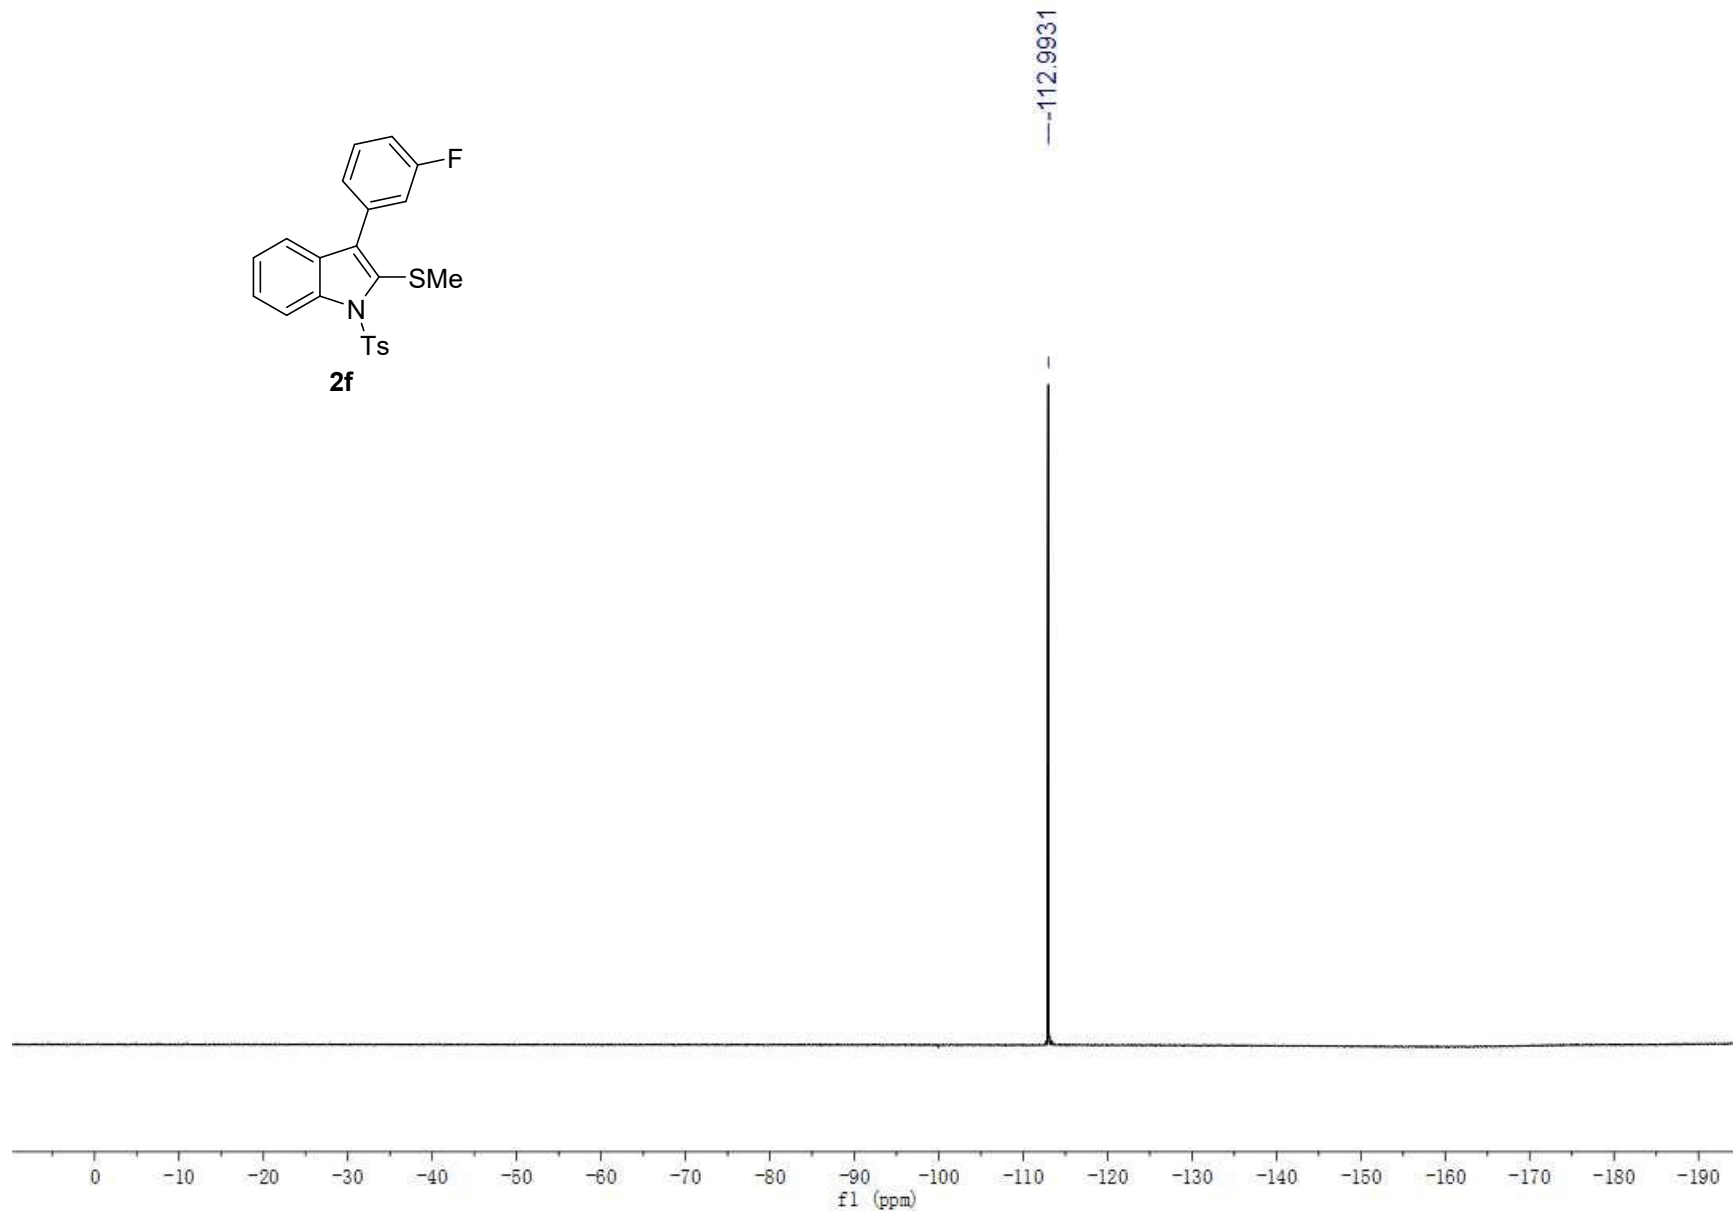



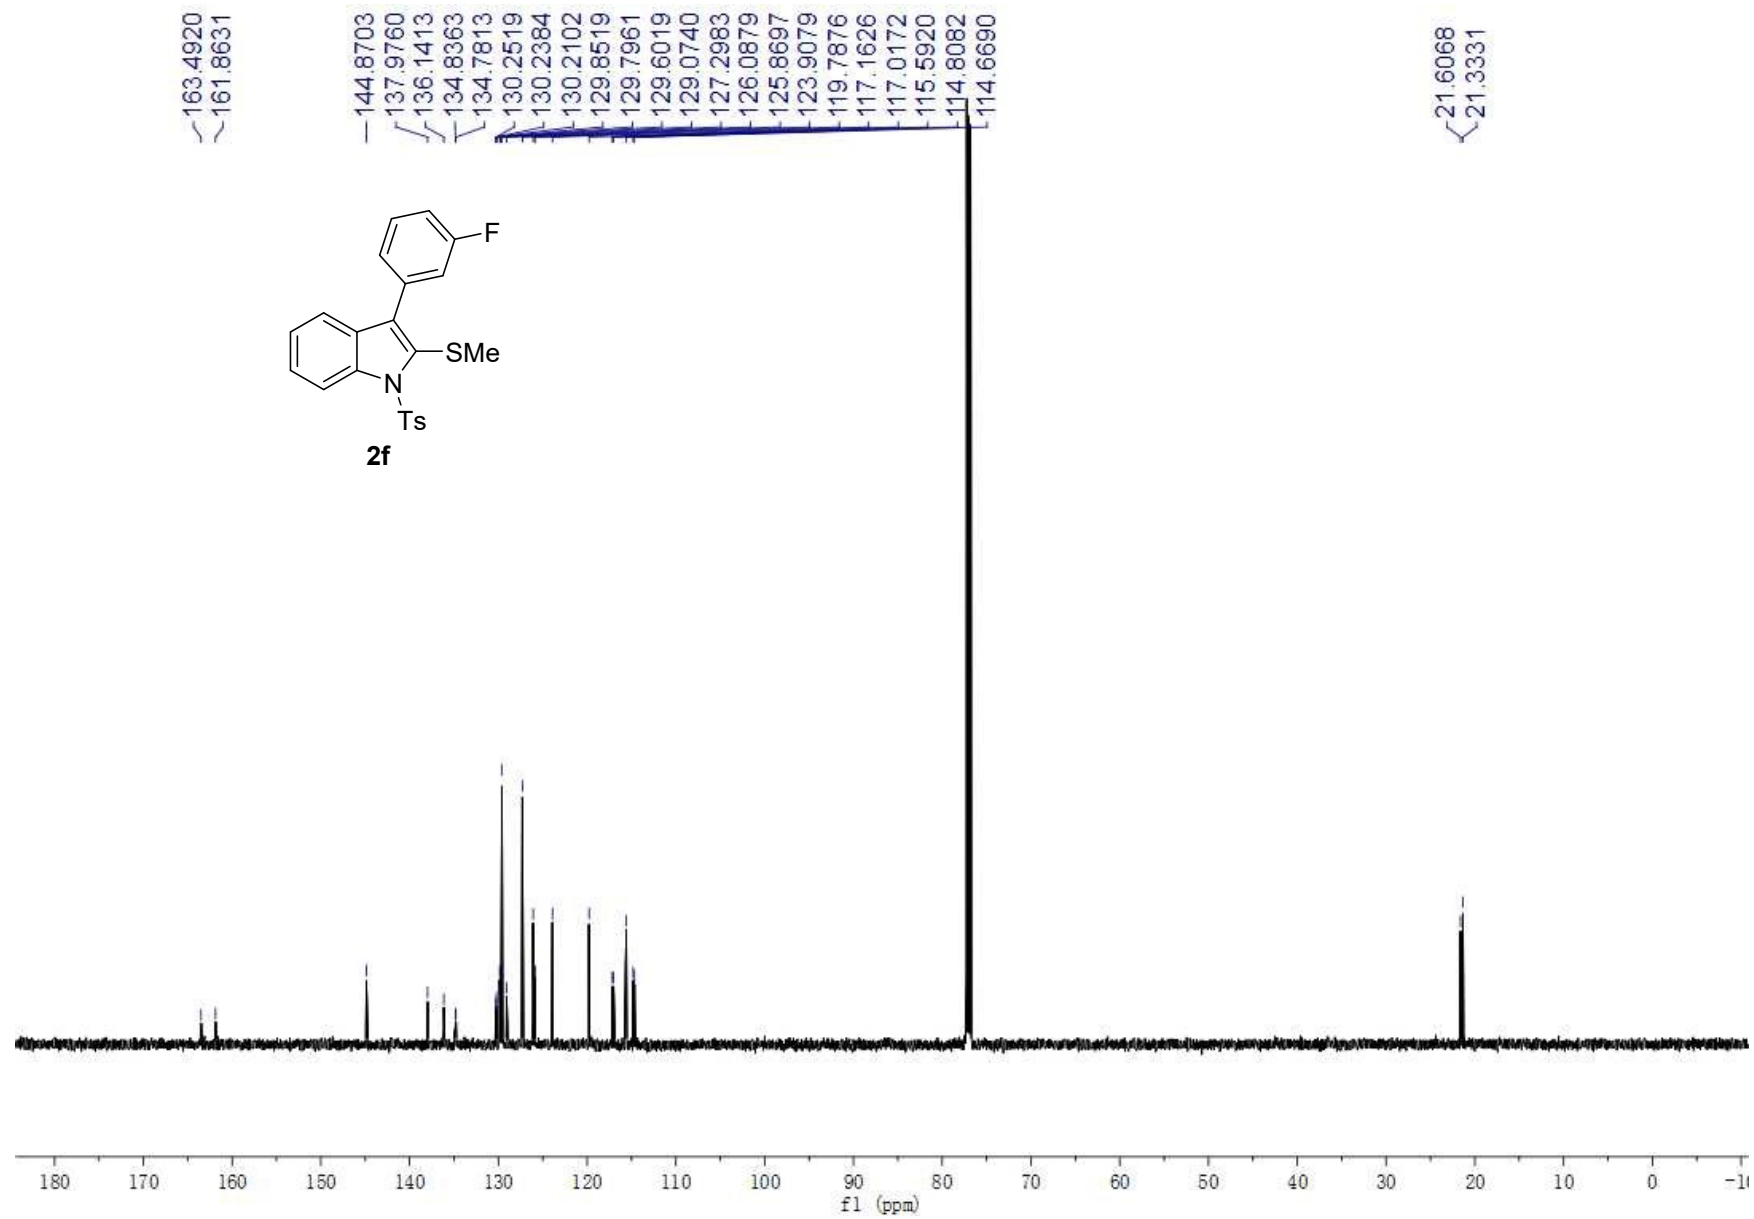

8.4221  
8.4079  
7.8547  
7.8408  
7.5937  
7.5797  
7.4362  
7.4240  
7.4100  
7.3969  
7.3243  
7.3104  
7.2807  
7.2678  
7.2240  
7.2103

2.3622  
2.3010

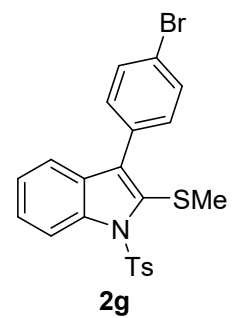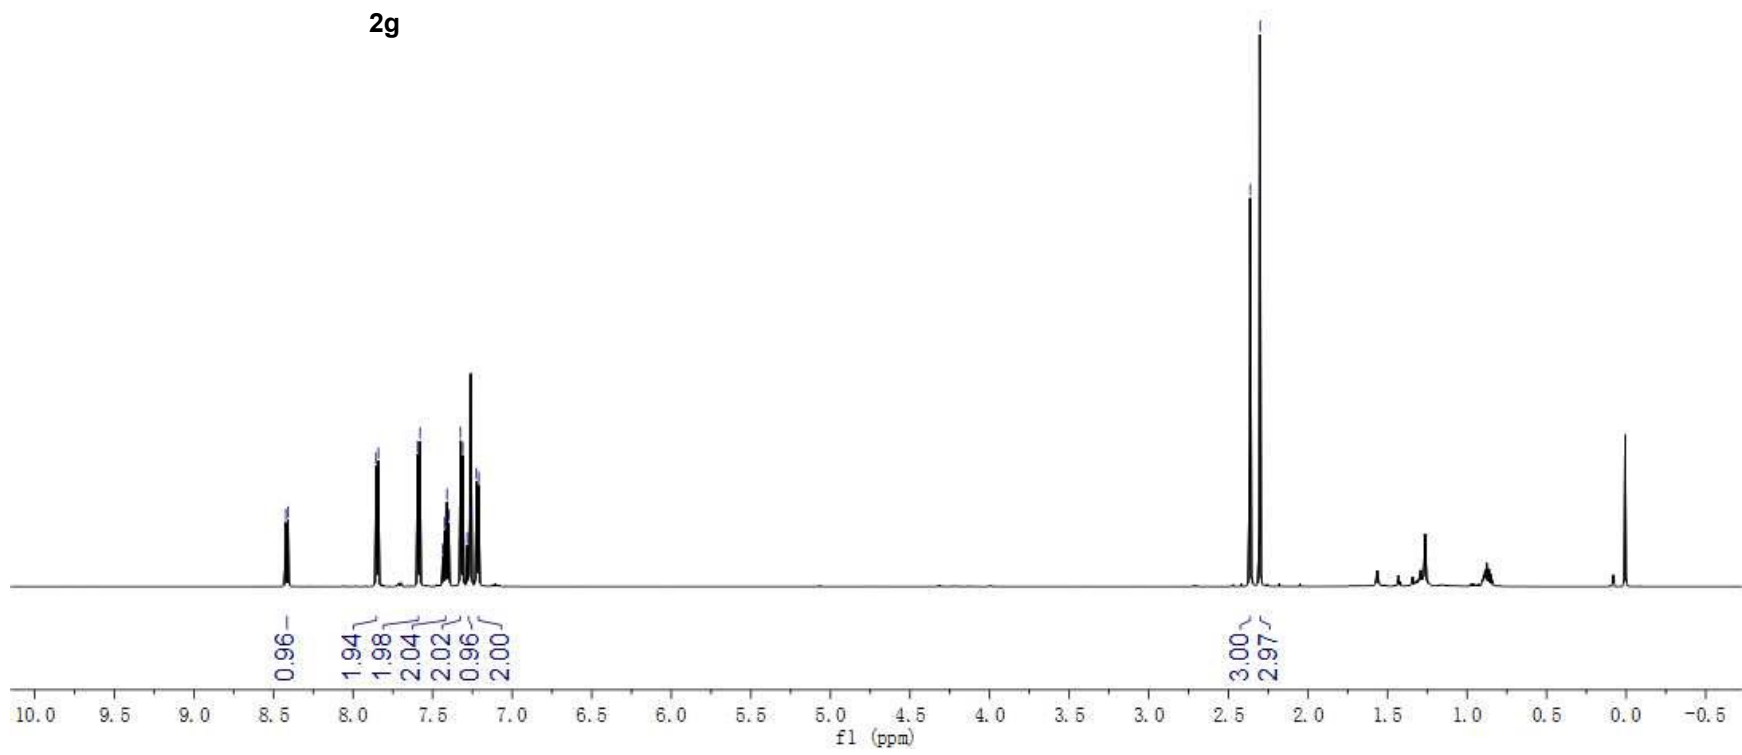

144.8763  
137.9947  
136.1263  
131.7631  
131.5869  
130.3588  
129.9739  
129.6100  
129.0315  
127.3049  
126.1145  
123.9053  
122.0313  
119.7648  
115.5990

21.6232  
21.3642

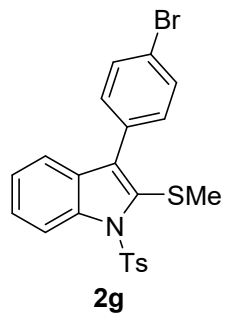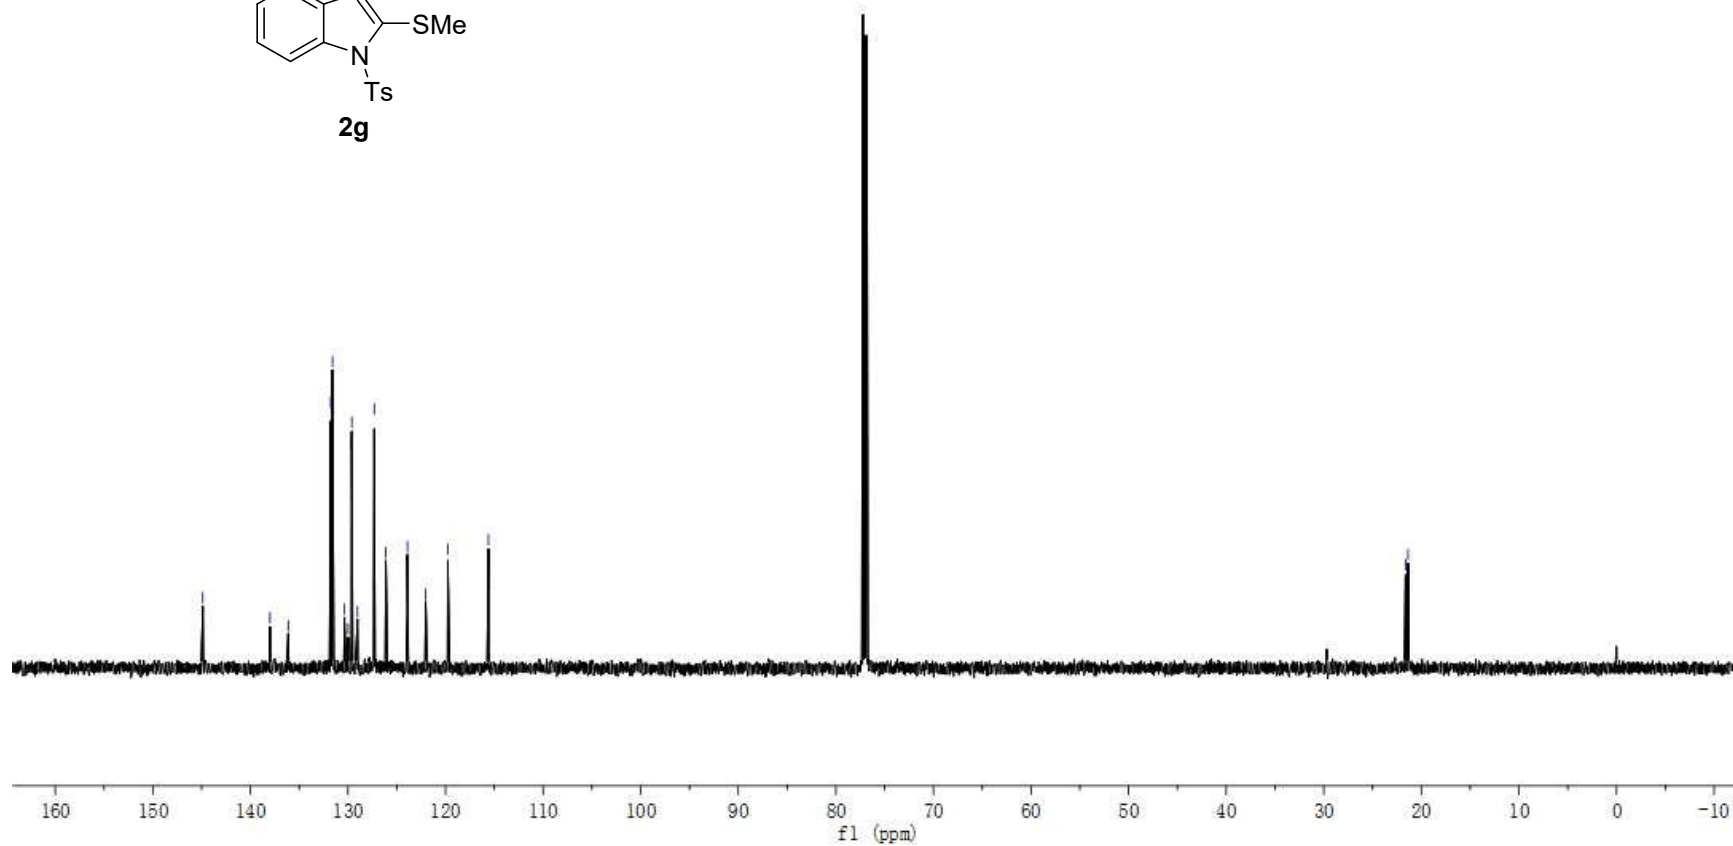

8.4380  
8.4167  
7.8671  
7.8461  
7.7055  
7.7009  
7.6892  
7.6846  
7.6801  
7.6709  
7.6675  
7.6497  
7.5344  
7.5297  
7.5184  
7.5136  
7.5009  
7.4875  
7.4692  
7.4497  
7.4331  
7.4300  
7.4119  
7.3900  
7.3717  
7.3020  
7.3001  
7.2822  
7.2287  
2.3084  
2.3037  
2.3554

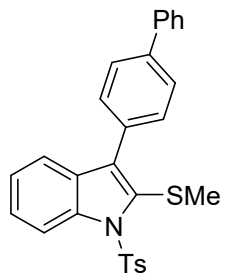

2h

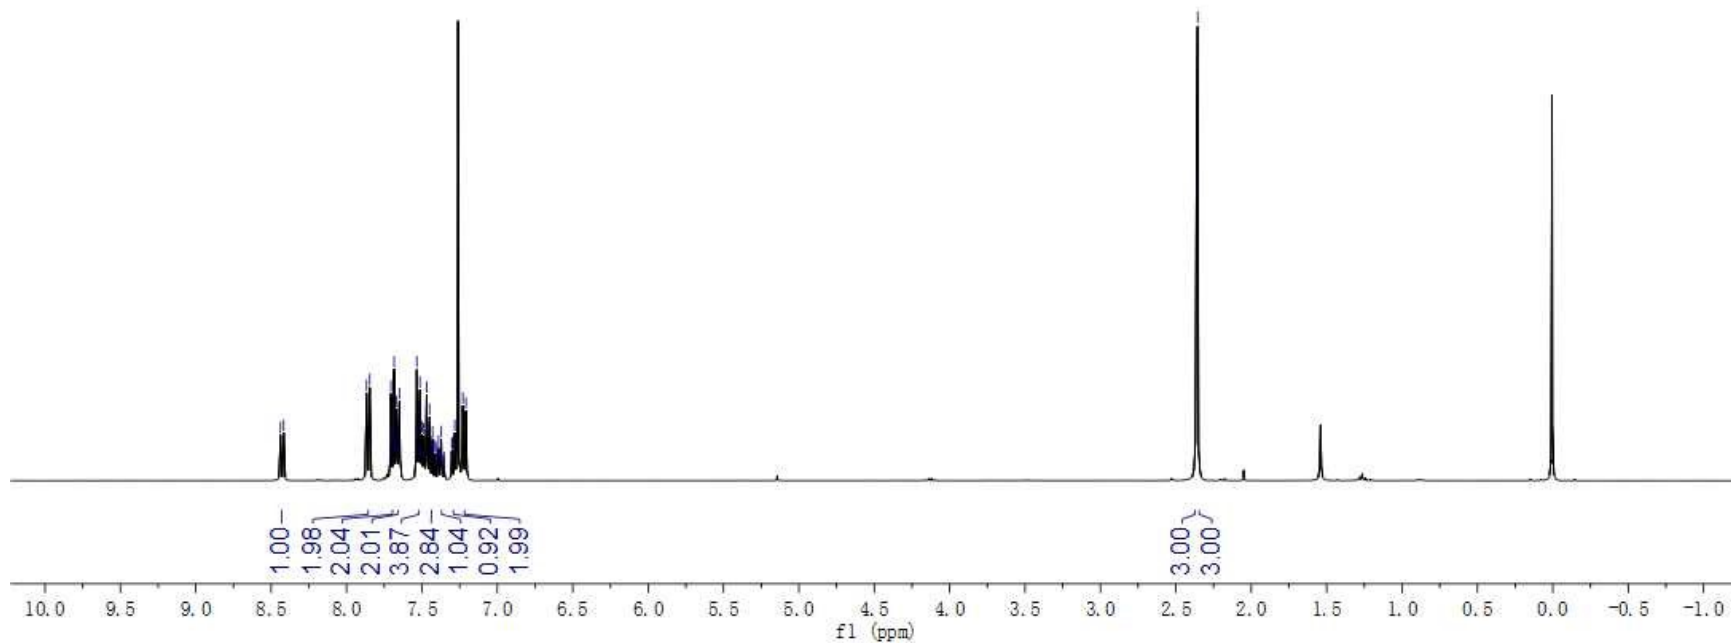

144.7753  
140.6481  
140.5801  
138.0759  
136.0982  
131.5639  
131.2123  
130.5031  
129.8344  
129.5709  
129.4517  
128.8359  
127.4594  
127.2817  
127.0913  
127.0274  
125.9665  
123.8288  
120.0801  
115.6059

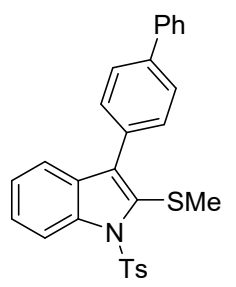

2h

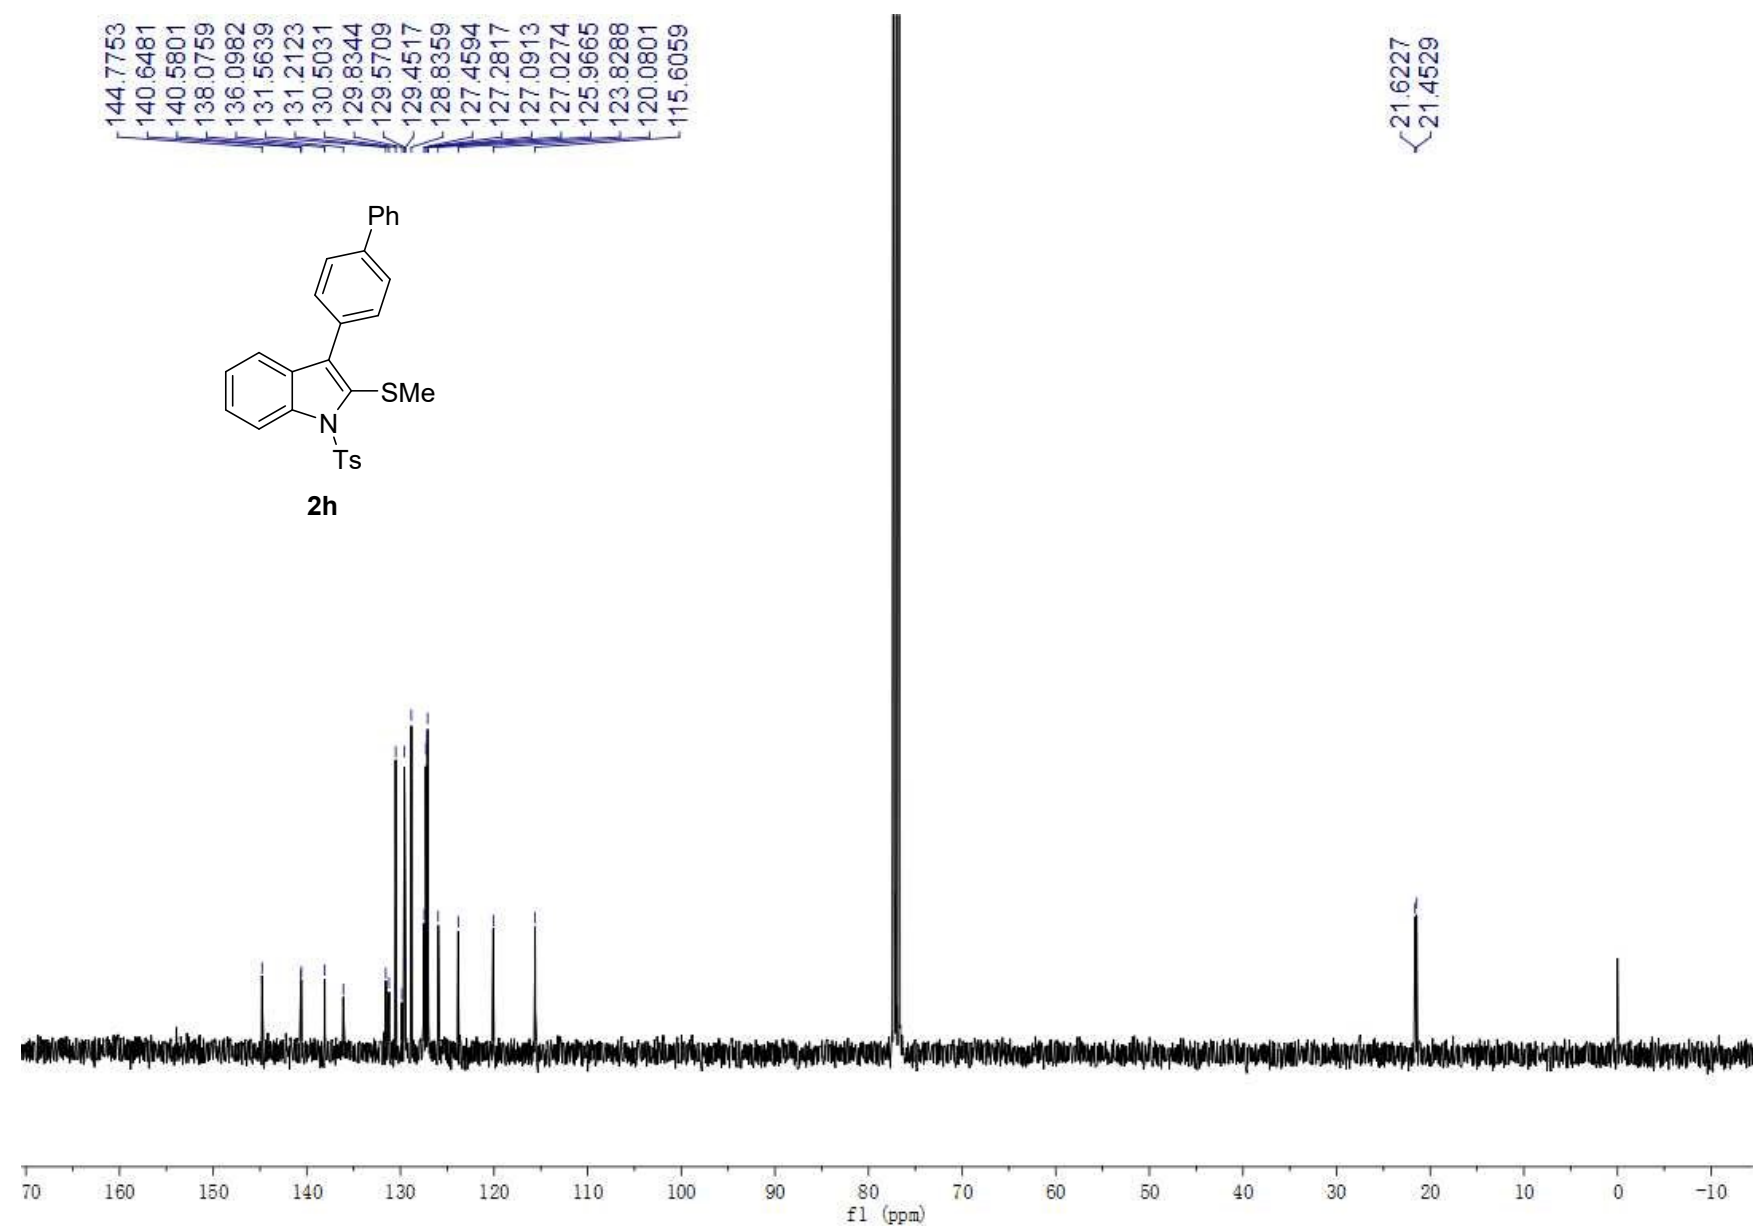

21.6227  
21.4529

8.3492  
8.3280  
7.7865  
7.7656  
7.4451  
7.4228  
7.4050  
7.4016  
7.3869  
7.3837  
7.3805  
7.3658  
7.3624  
7.2939  
7.2916  
7.2744  
7.1800  
7.1599

2.3810  
2.3328  
2.3085

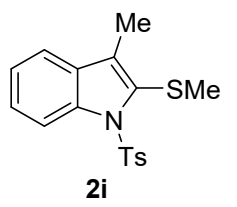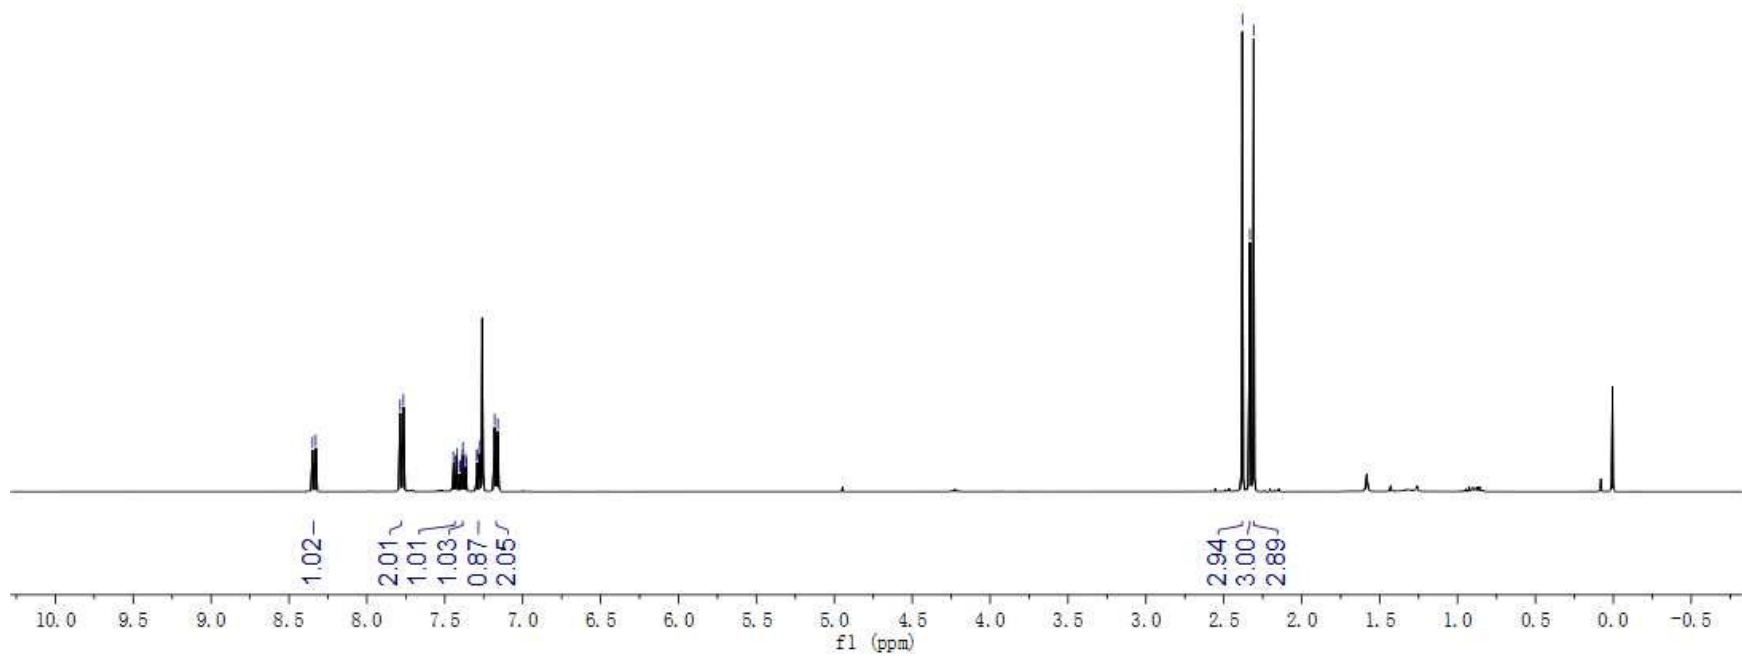

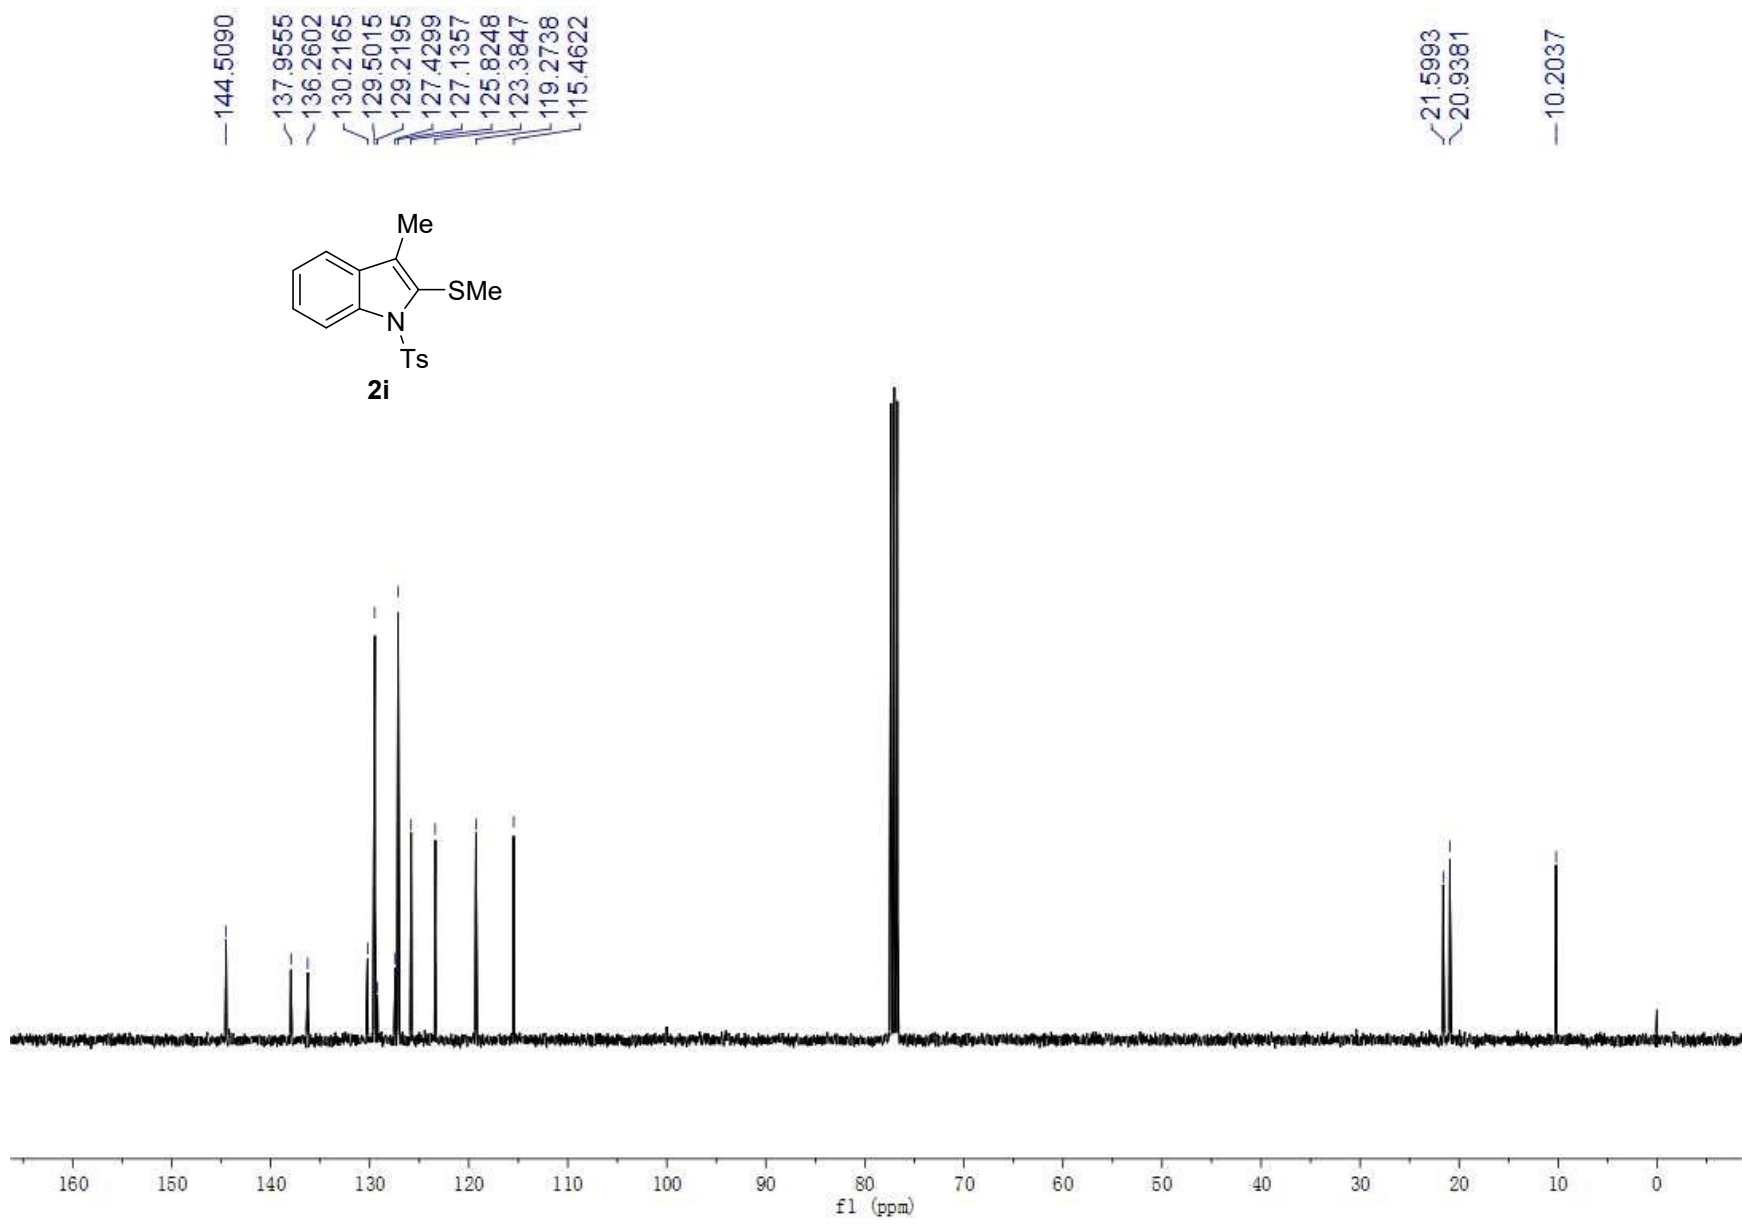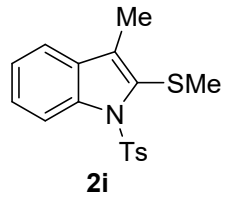

8.4209  
8.3996  
7.8006  
7.7522  
7.7330  
7.4896  
7.4866  
7.4680  
7.4657  
7.4521  
7.4477  
7.4362  
7.4321  
7.4261  
7.4230  
7.4197  
7.4052  
7.4018  
7.3982  
7.3530  
7.3338  
7.3201  
7.3012  
7.2853  
7.2832  
7.2656  
7.2478  
7.2460

2.3569  
2.2927

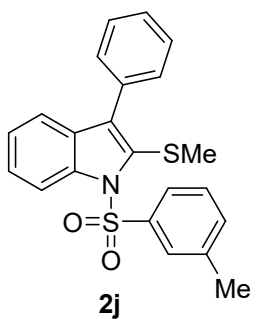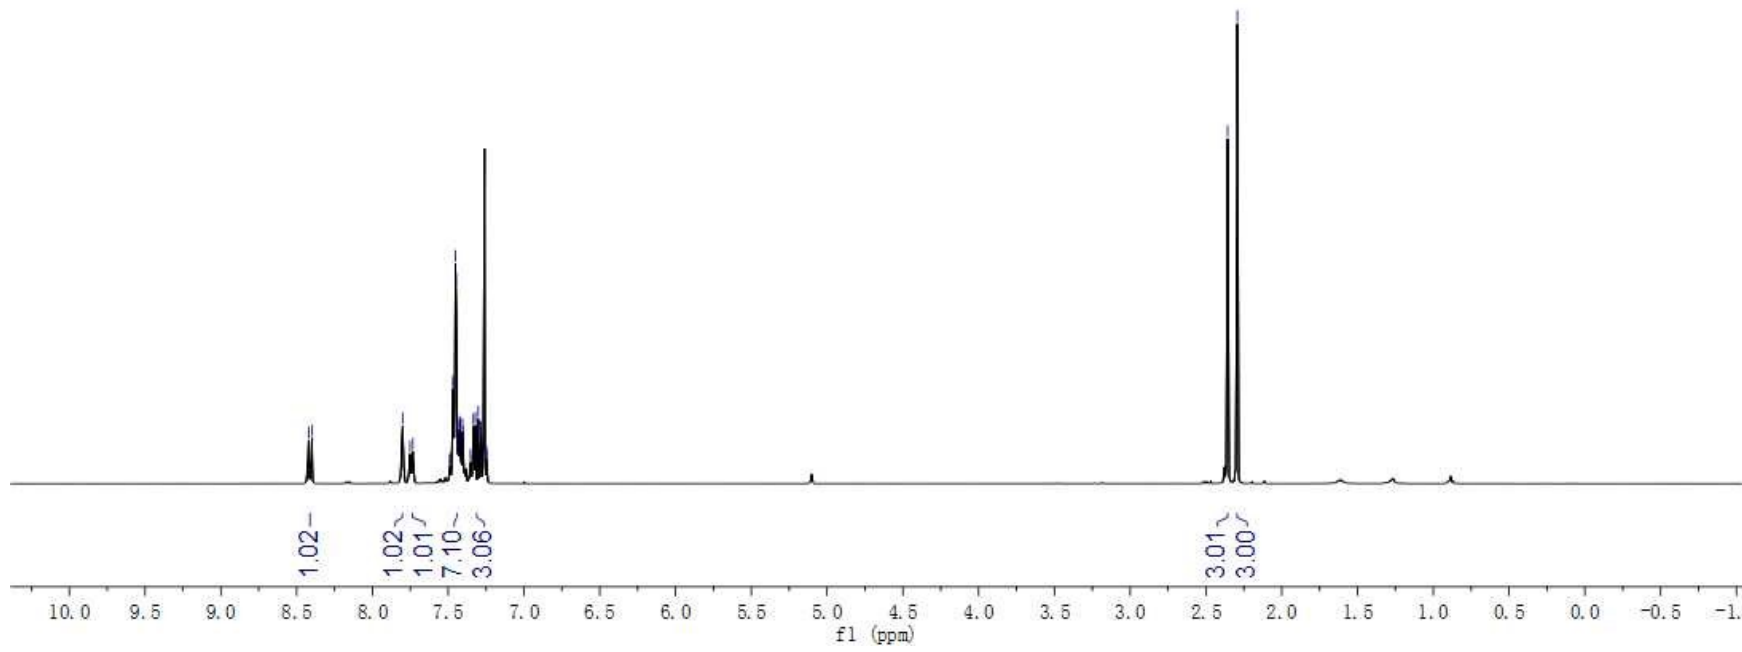



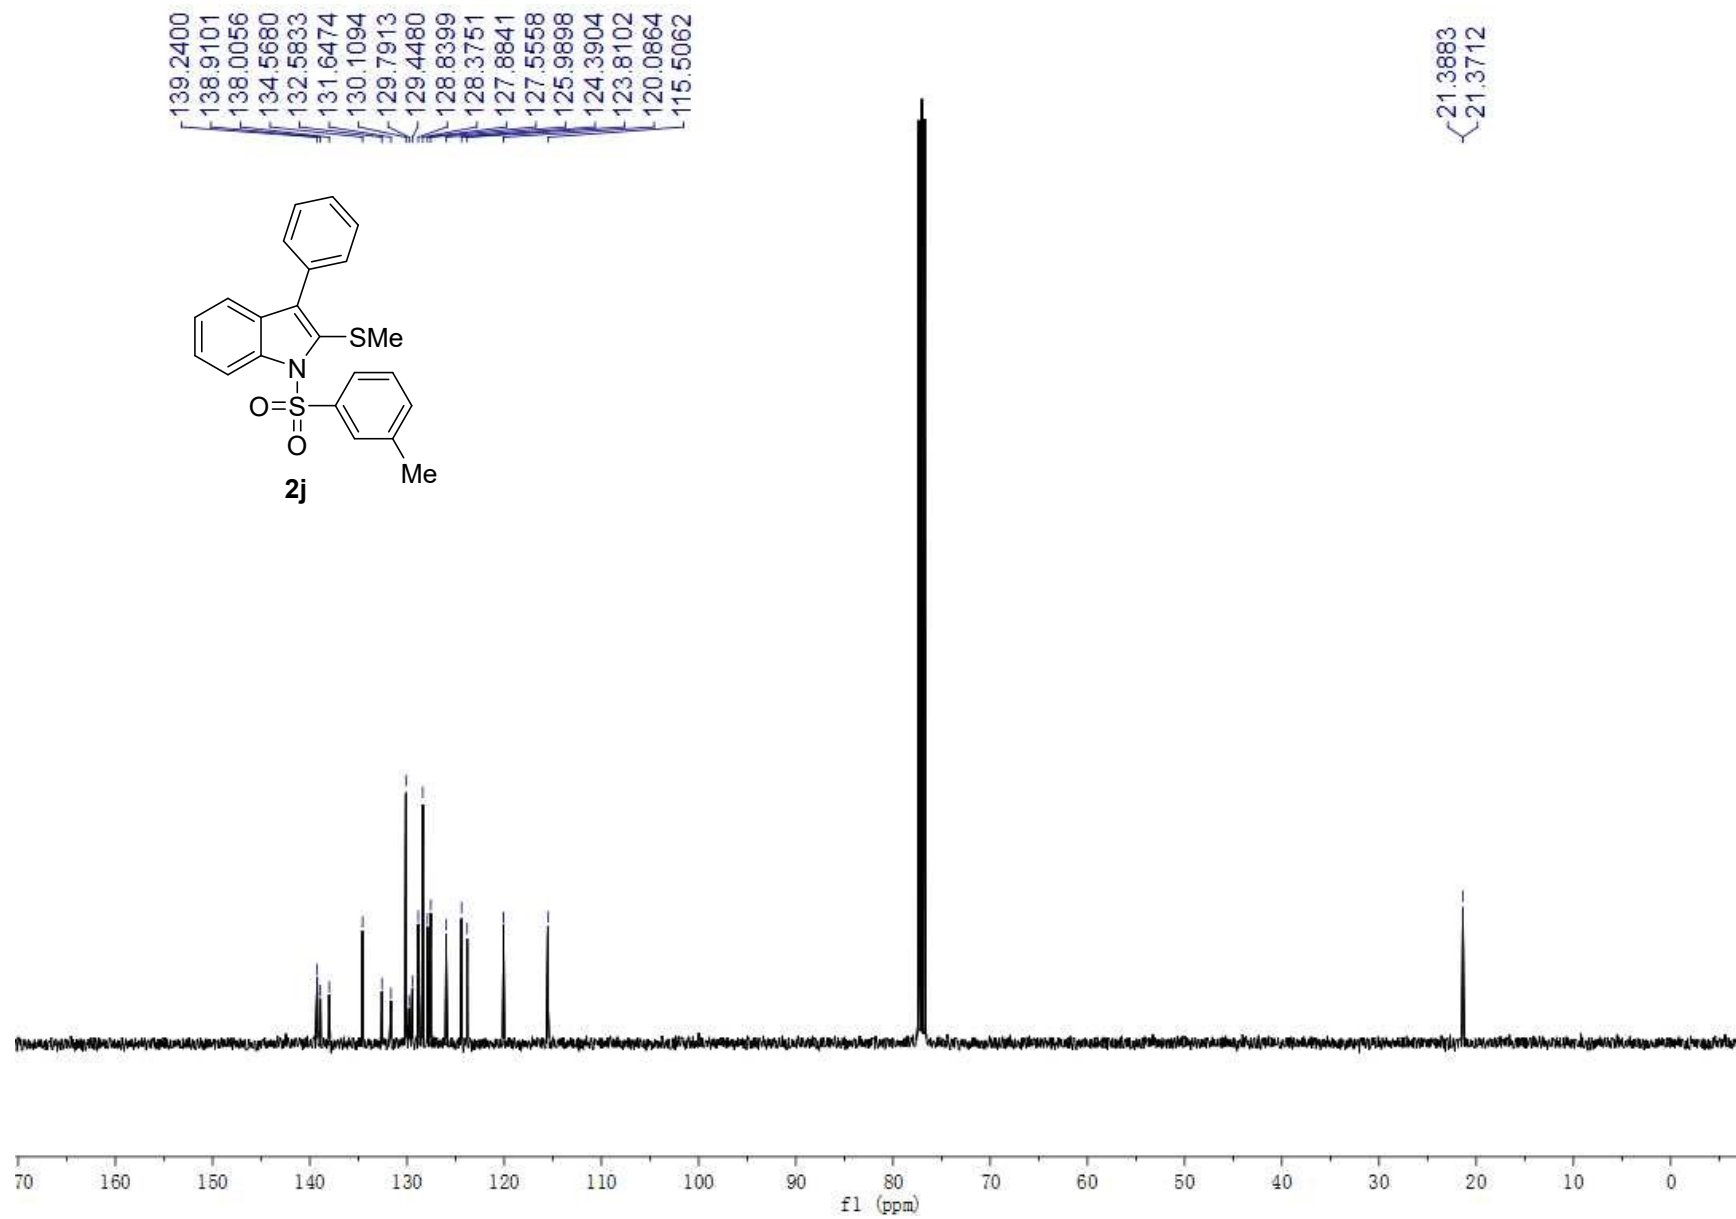

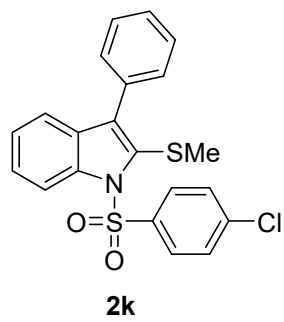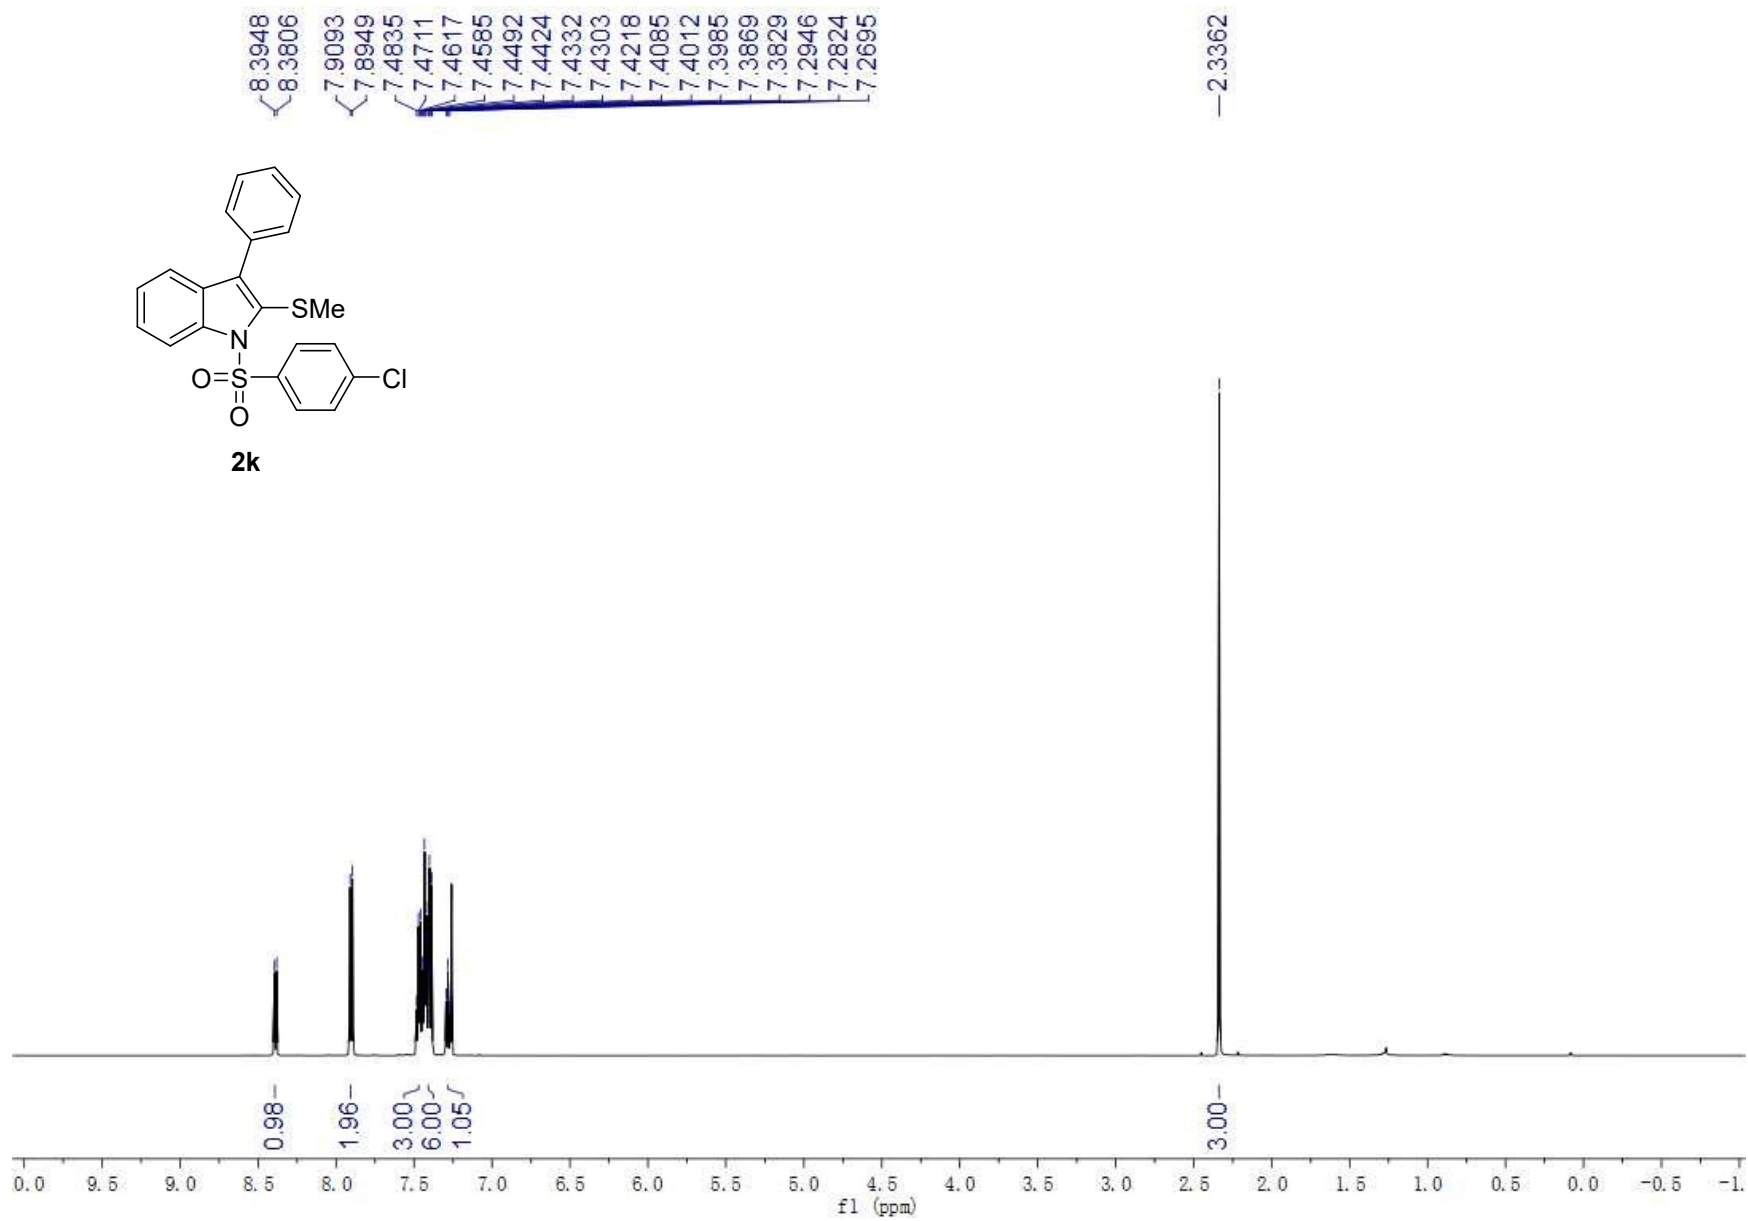

140.3778  
137.9846  
137.4011  
132.3811  
132.1583  
130.0806  
129.6930  
129.6600  
129.2742  
128.7174  
128.3791  
127.9817  
126.1618  
124.1145  
120.2533  
115.5126

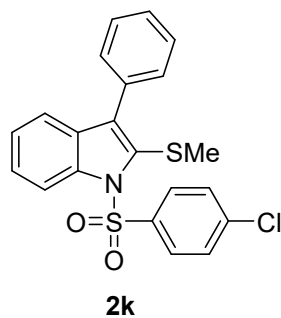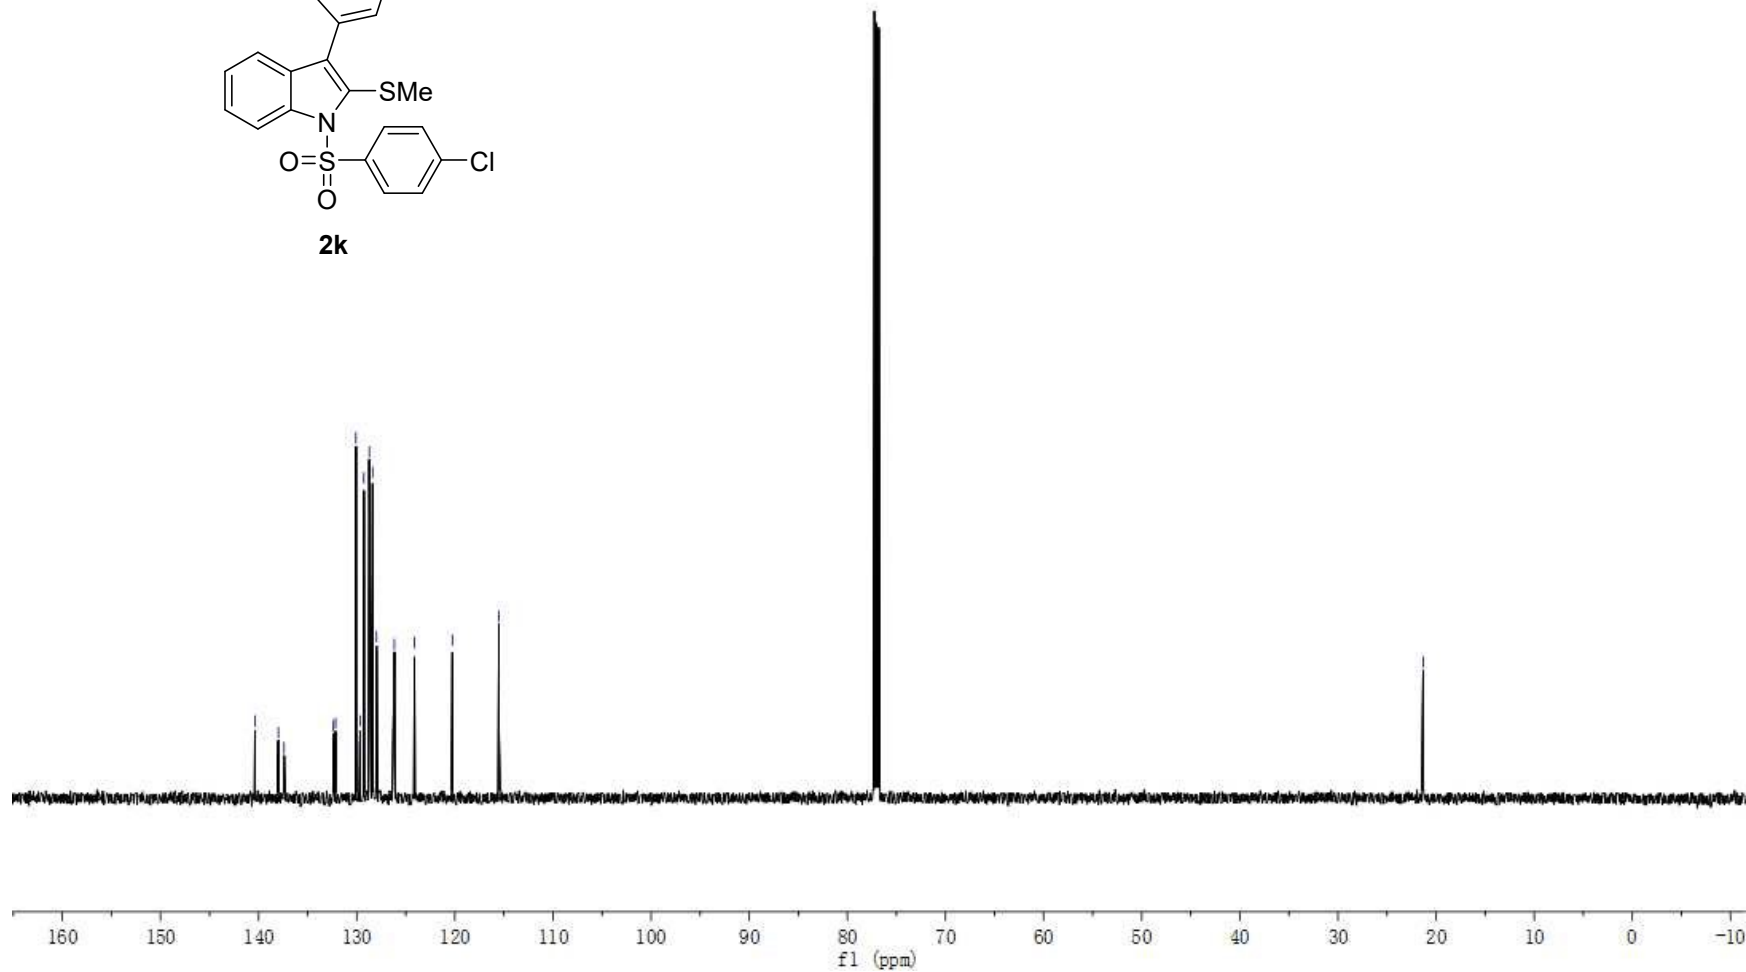

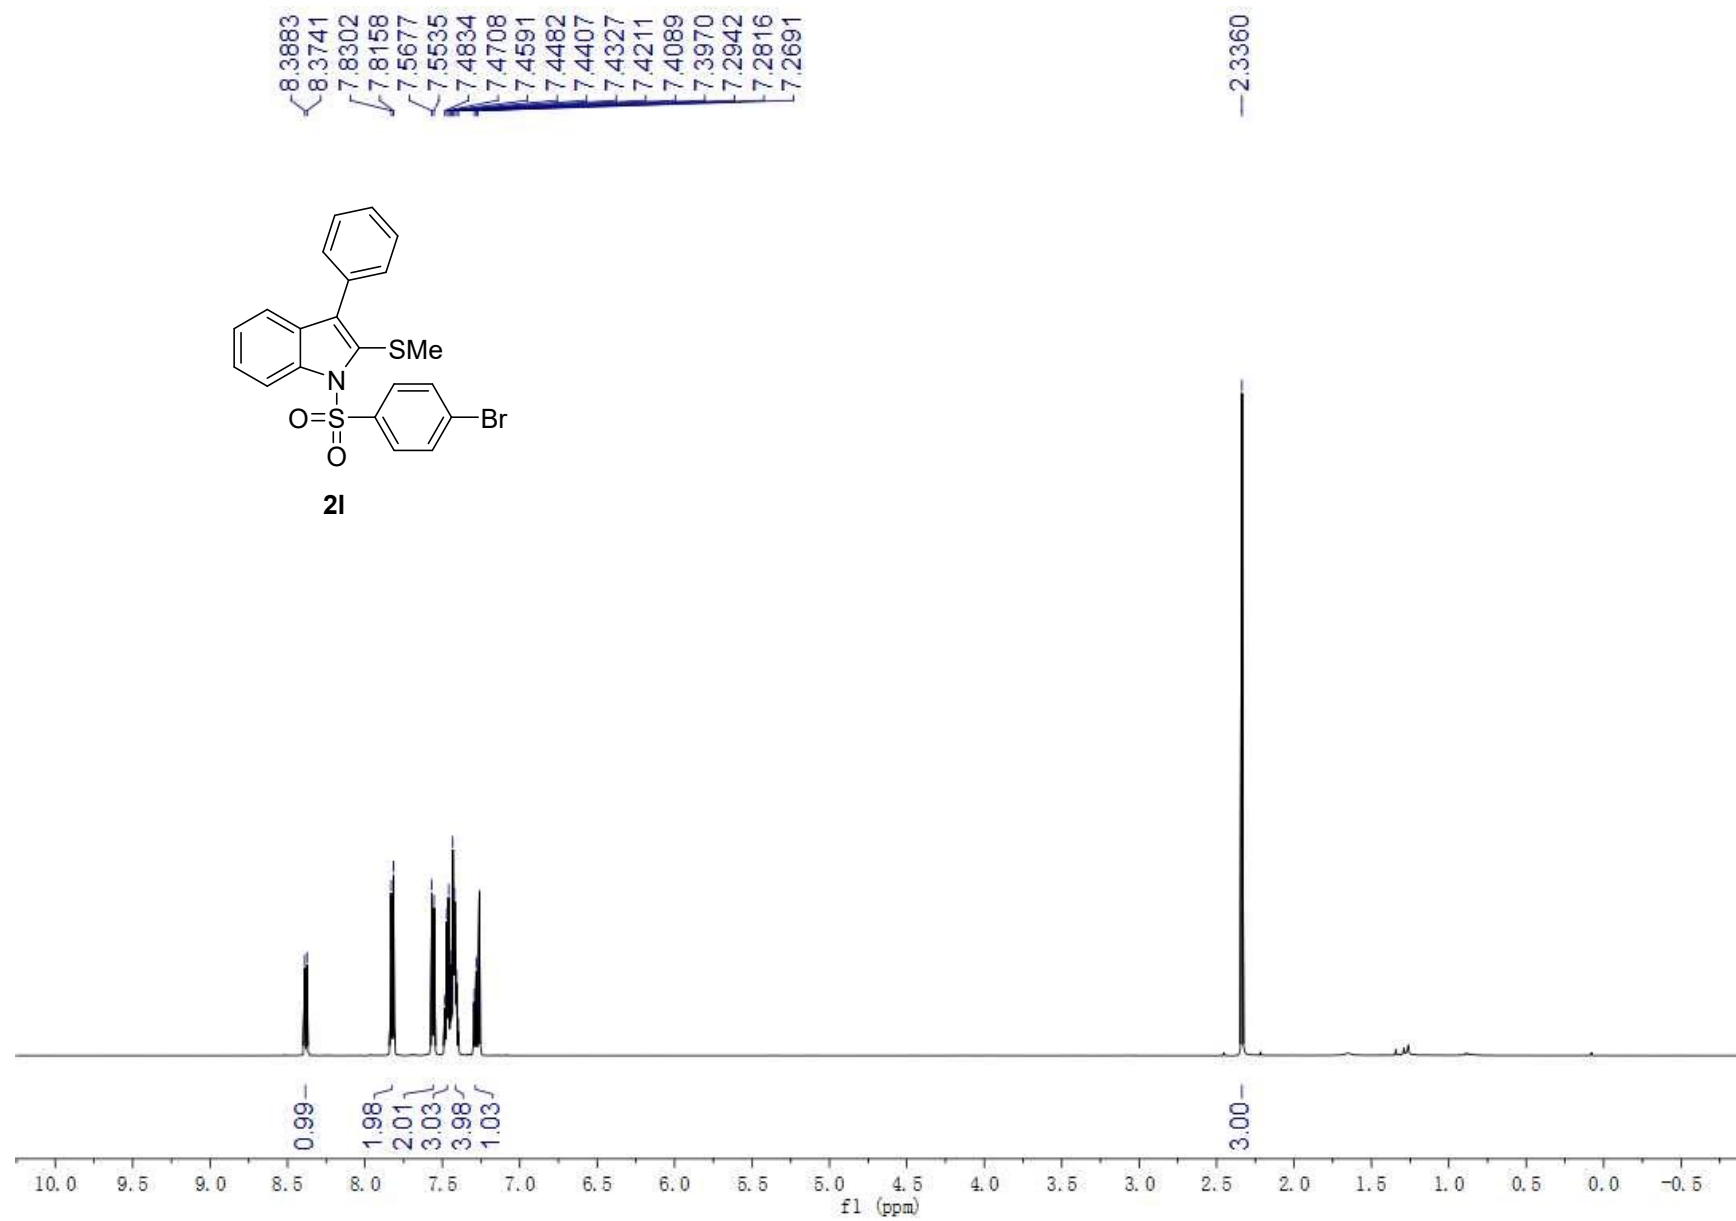

137.9658  
137.9232  
132.3666  
132.2678  
132.1775  
130.0812  
129.6554  
128.9556  
128.7512  
128.5179  
128.3800  
127.9869  
126.1722  
124.1251  
120.2655  
115.4993

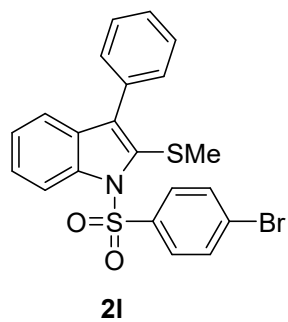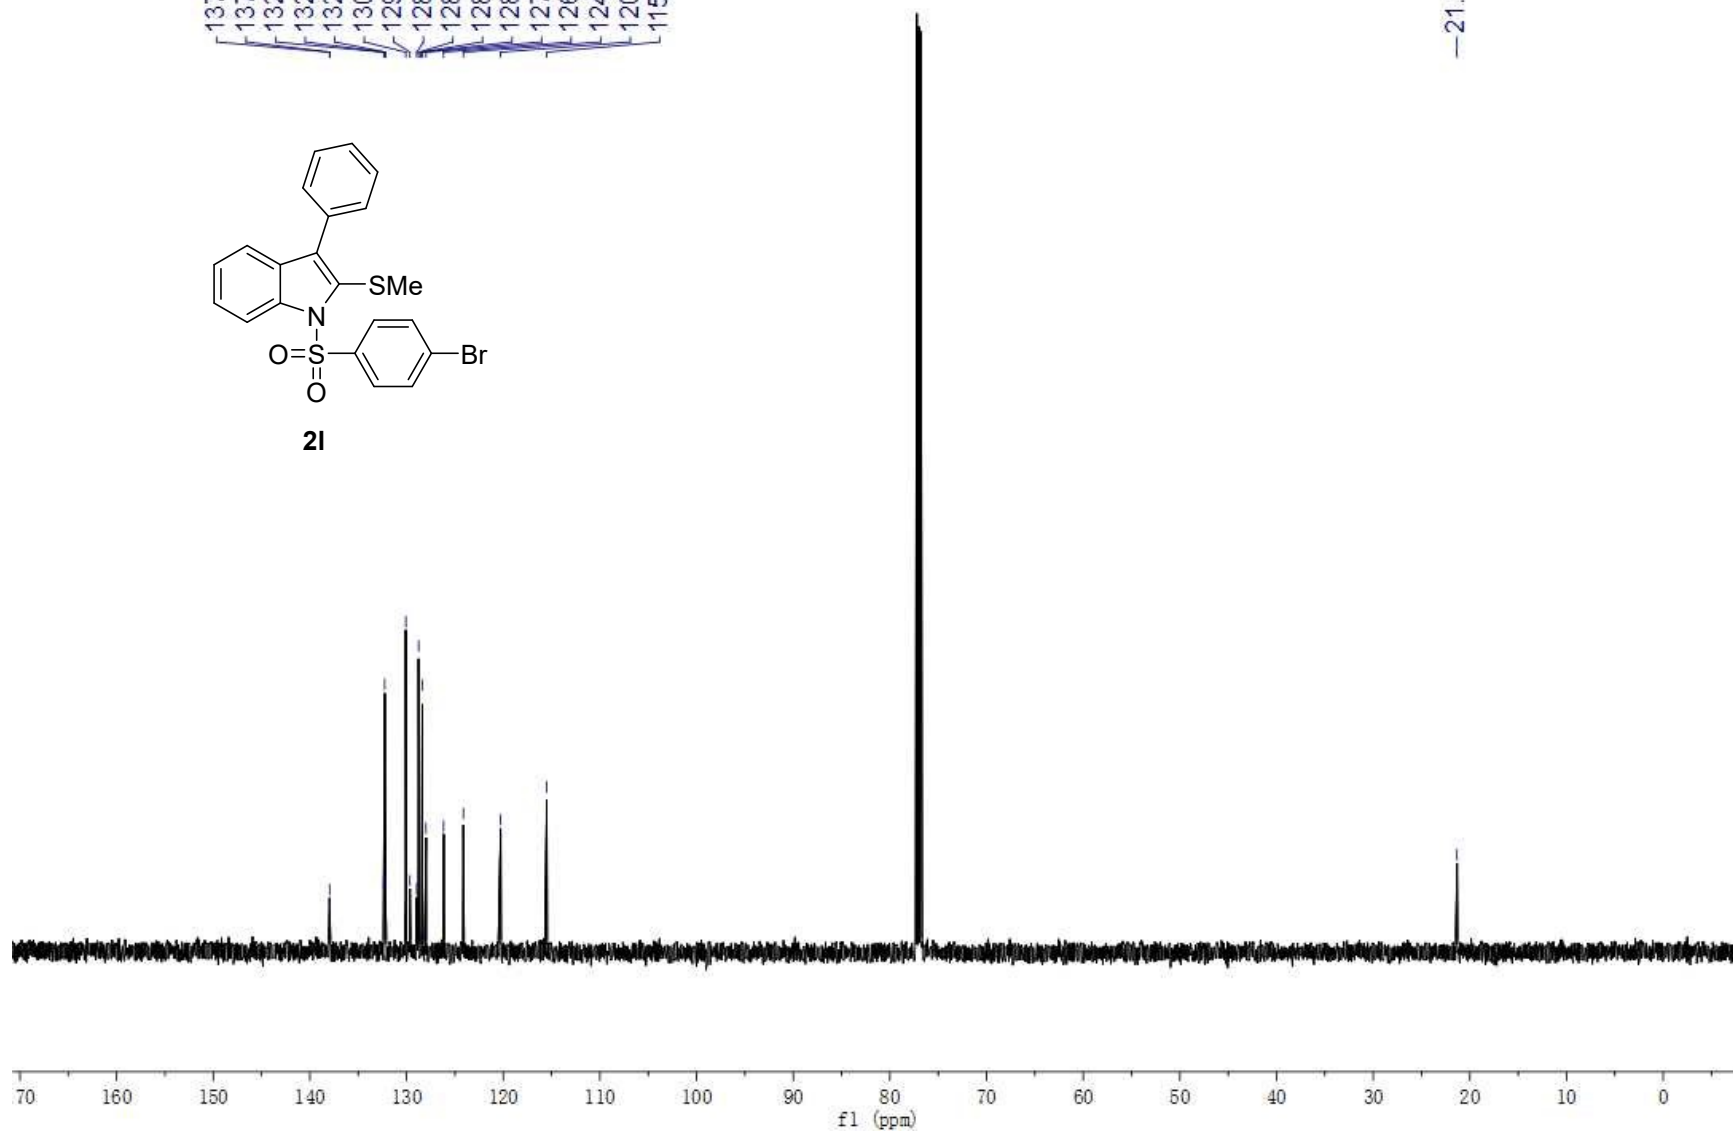

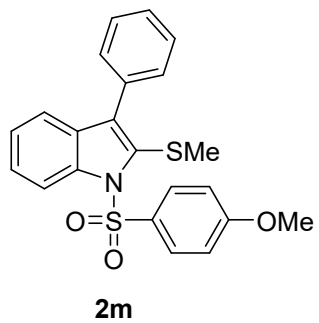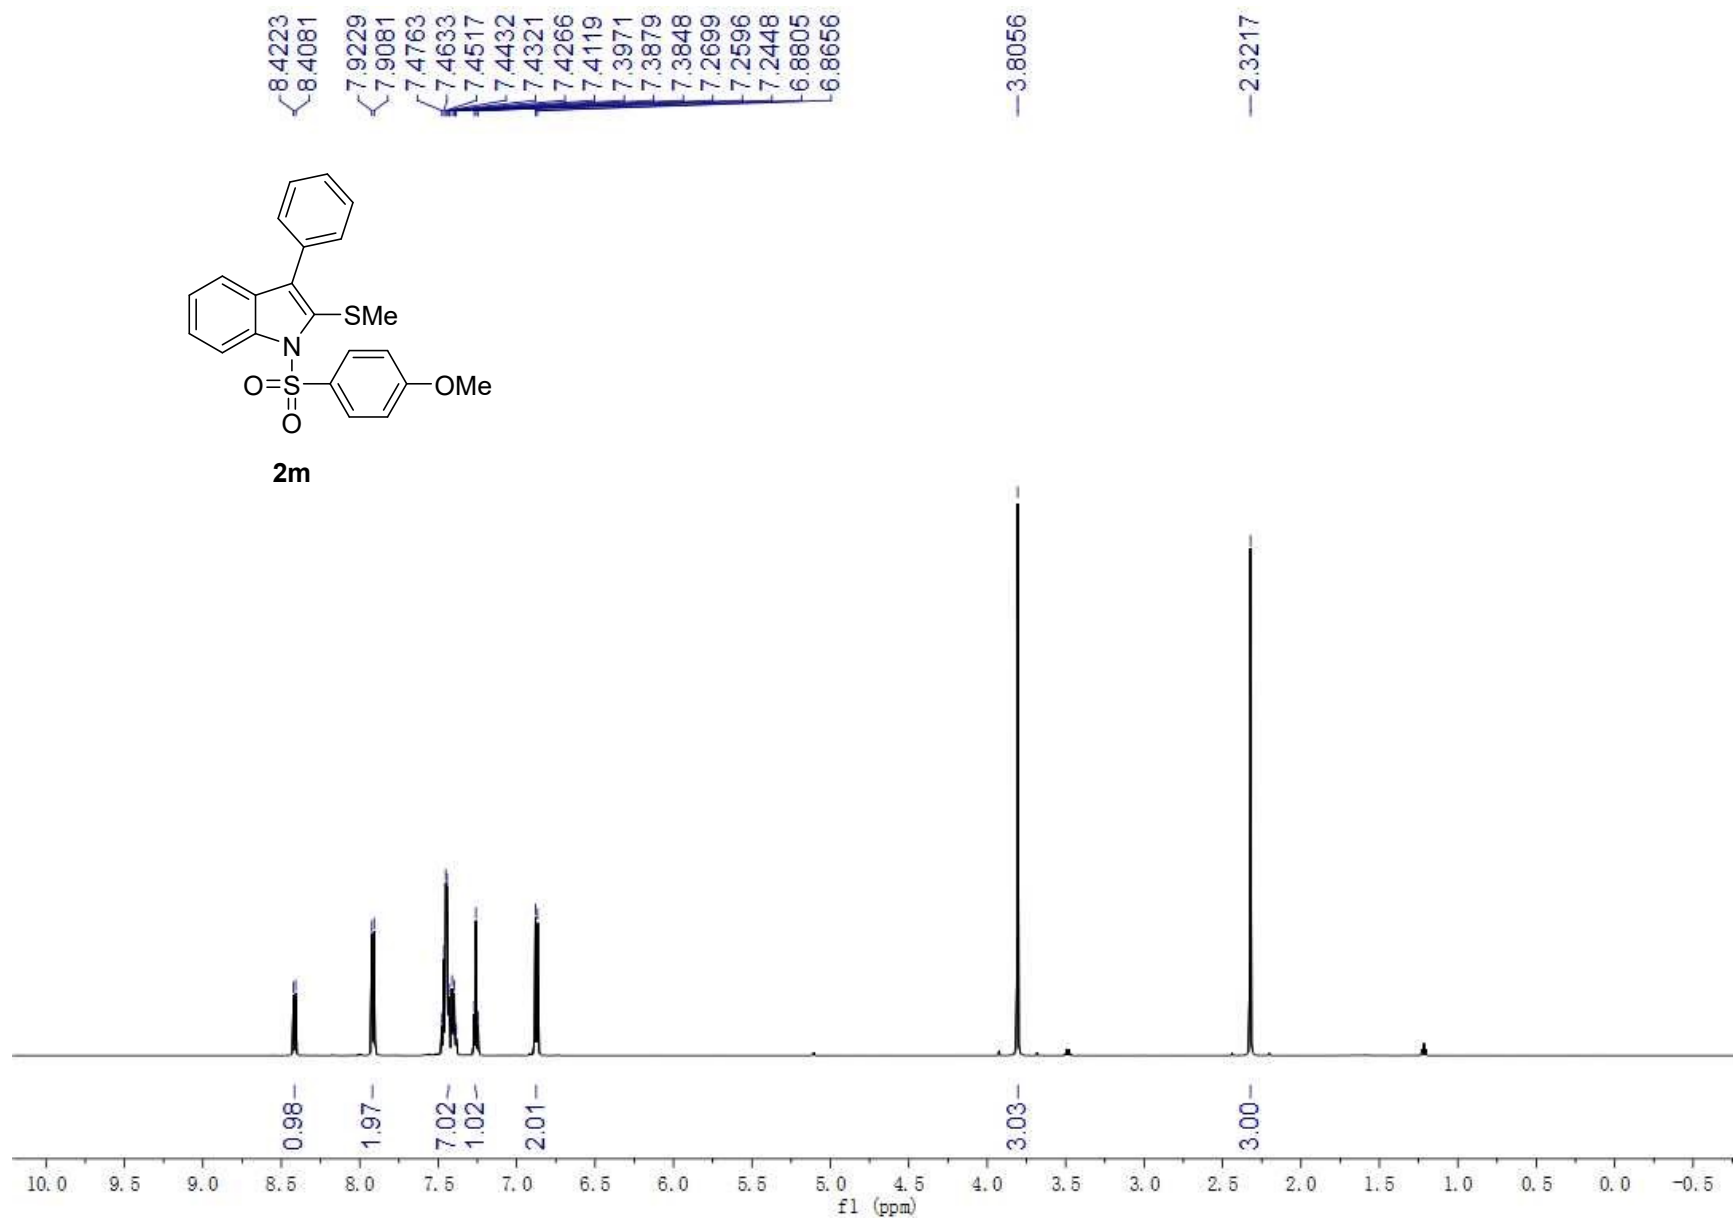

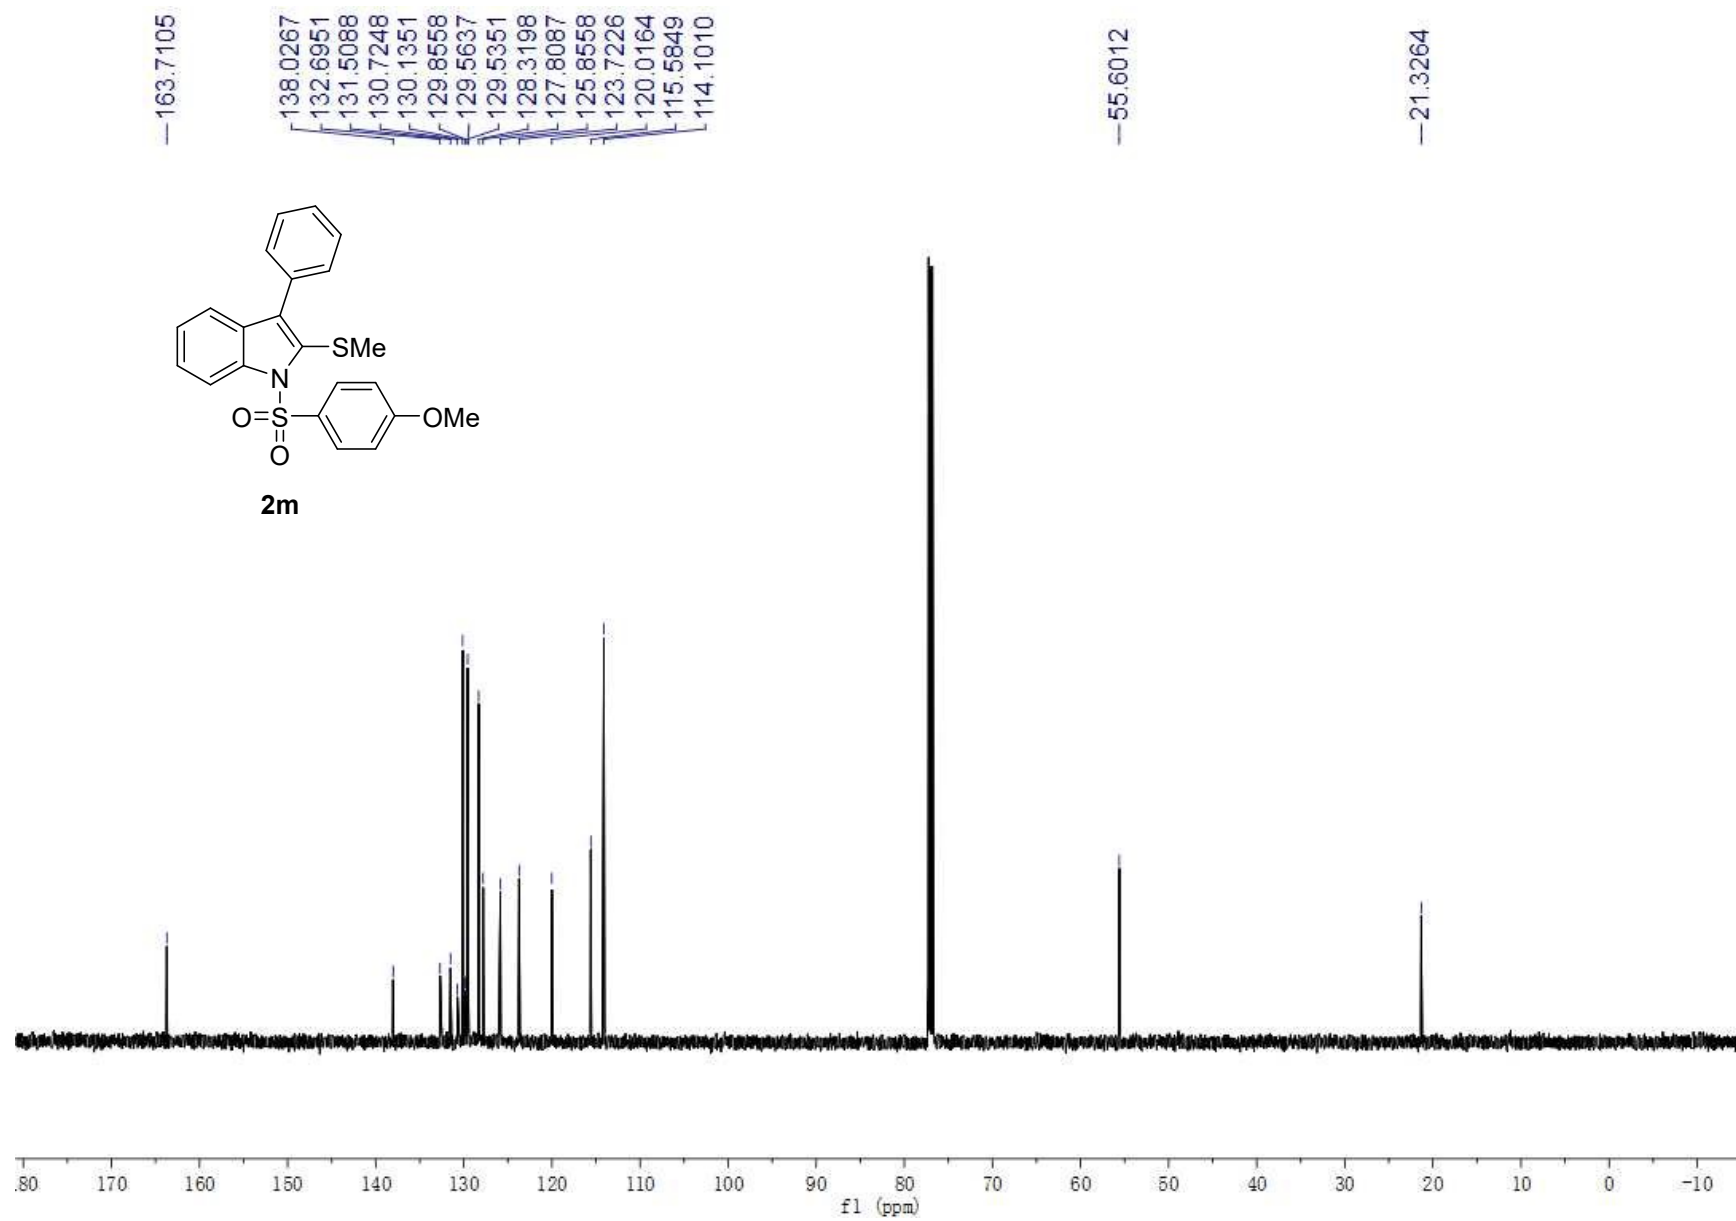

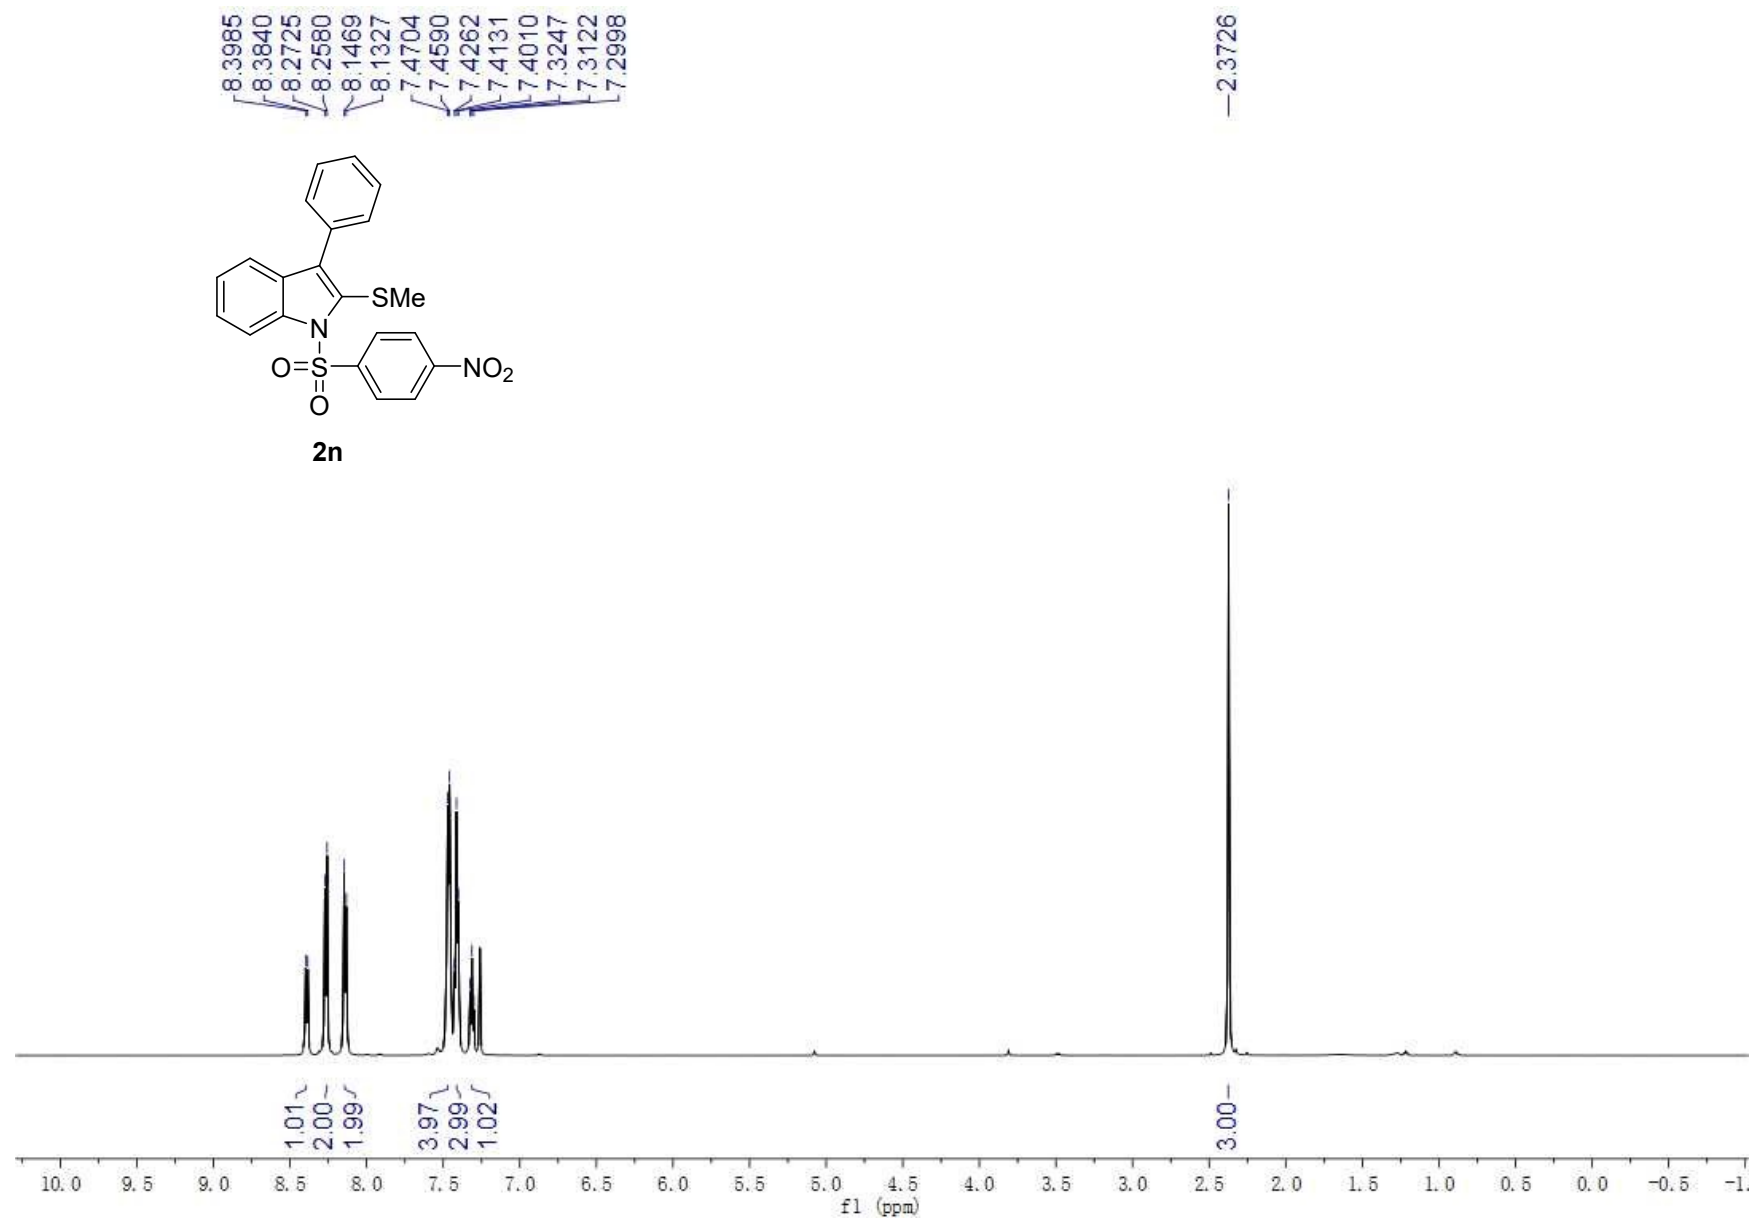



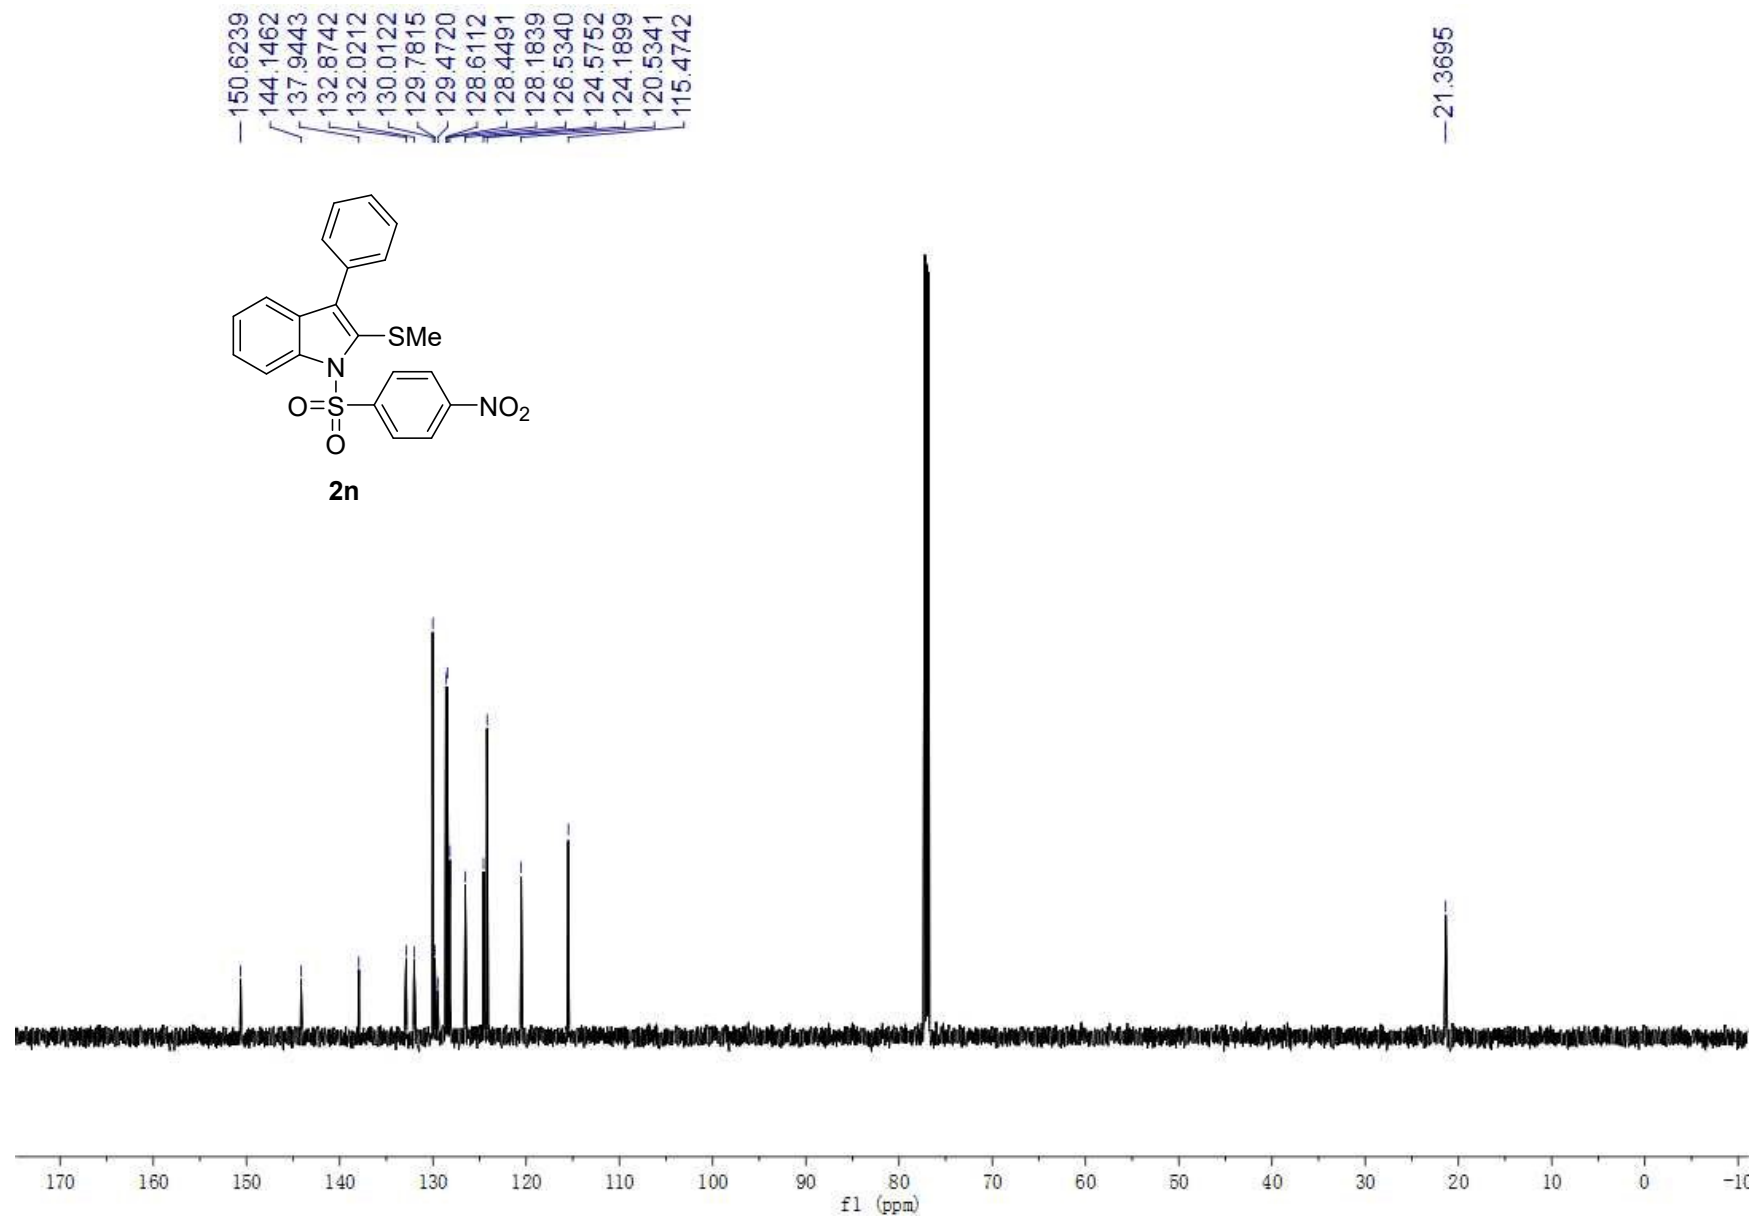

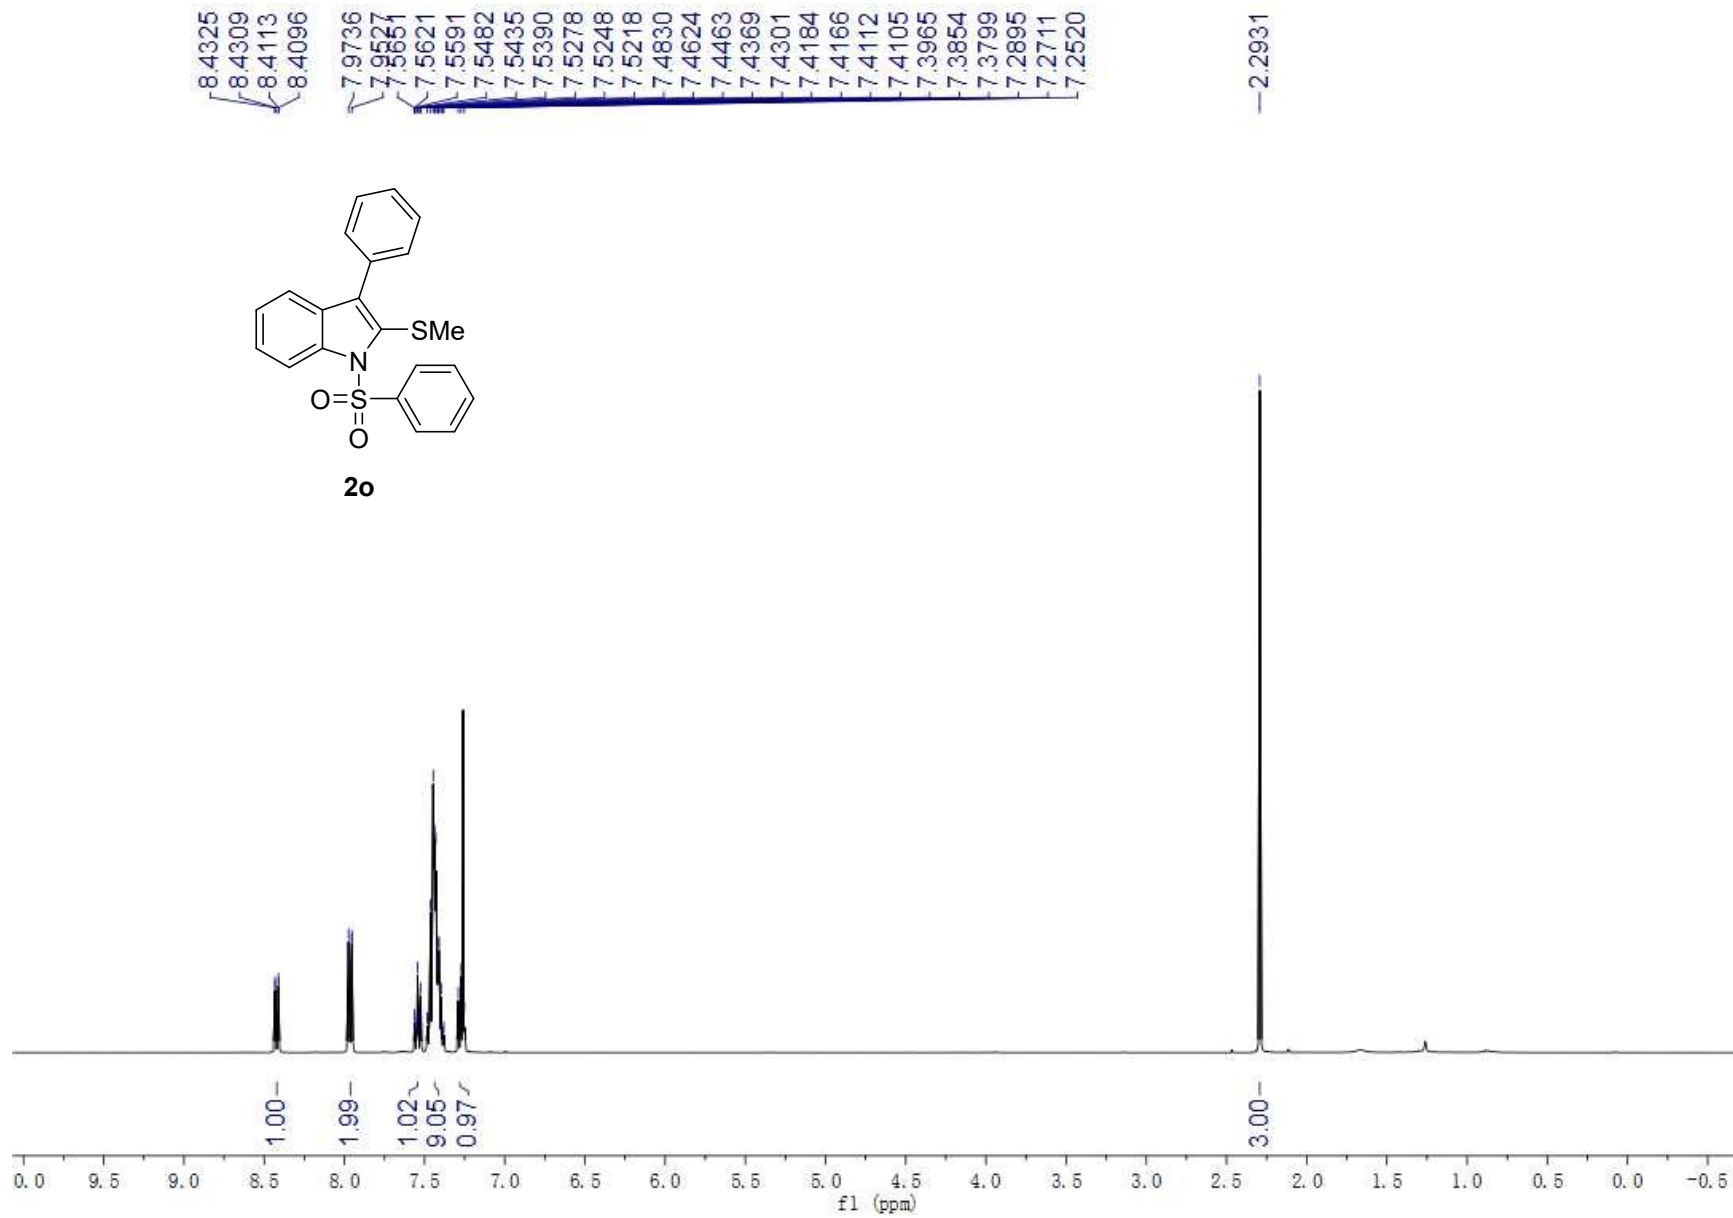

139.0005  
138.0513  
133.7334  
132.5157  
131.7665  
130.0975  
129.8054  
129.5205  
128.9831  
128.3804  
127.9143  
127.2551  
126.0395  
123.9135  
120.1233  
115.5468

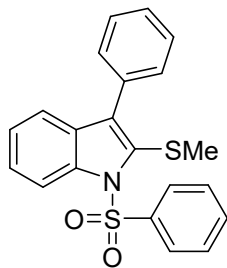

**2o**

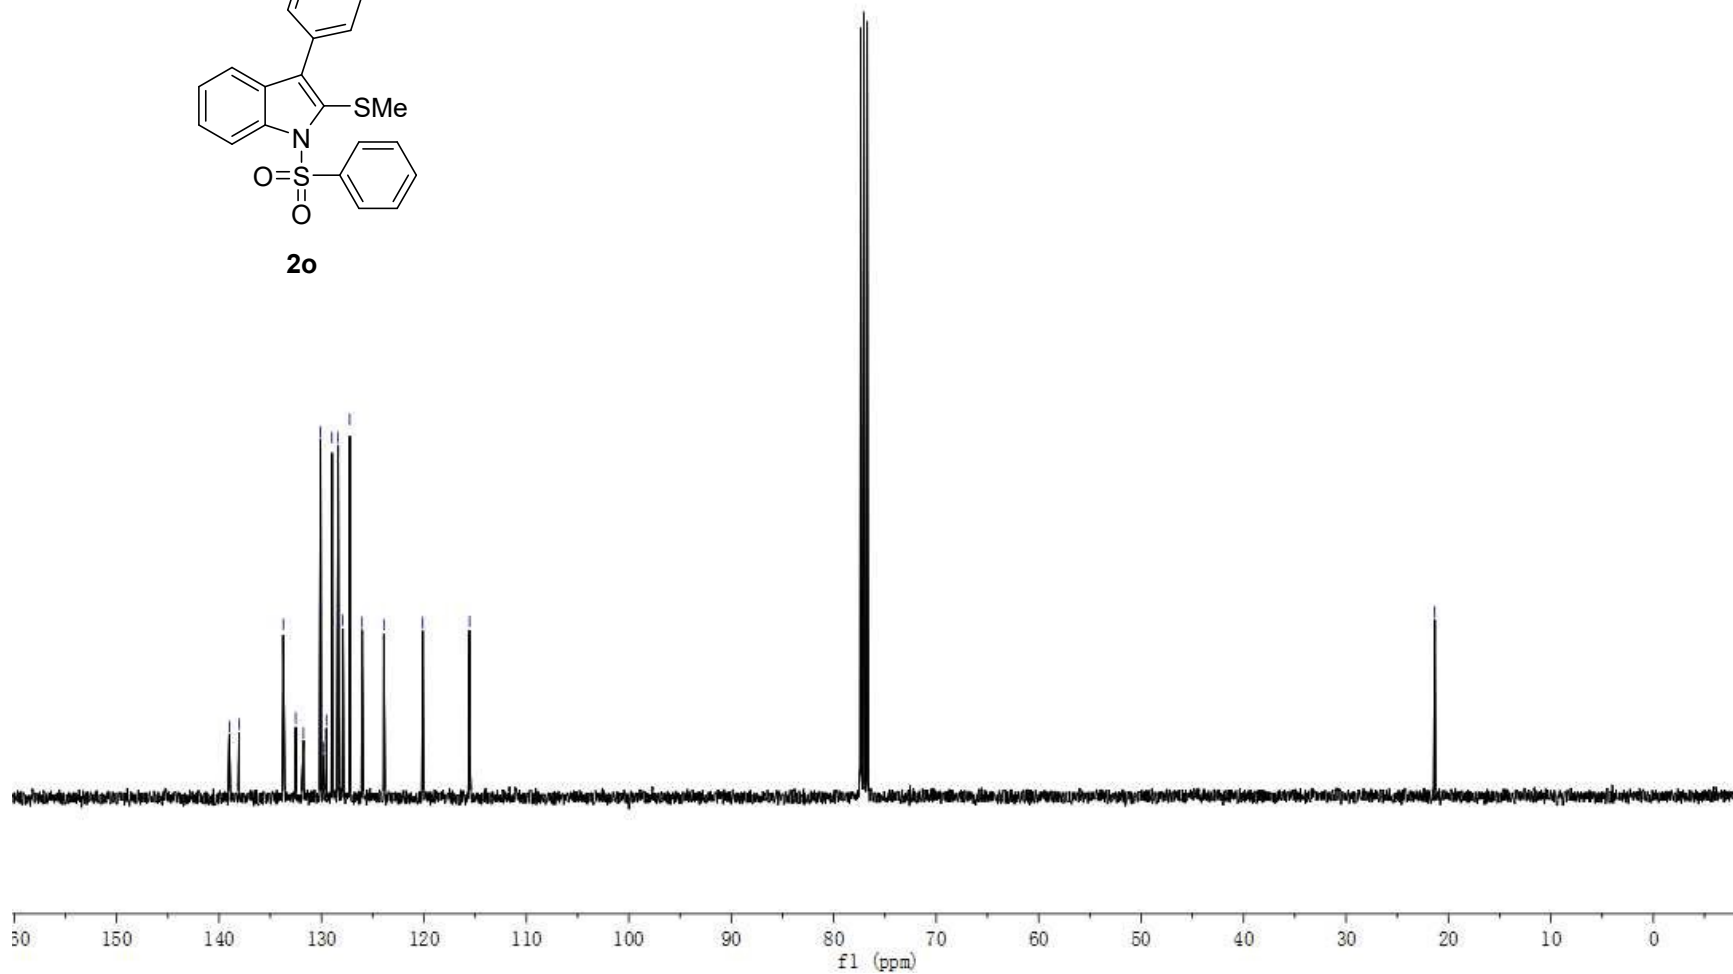

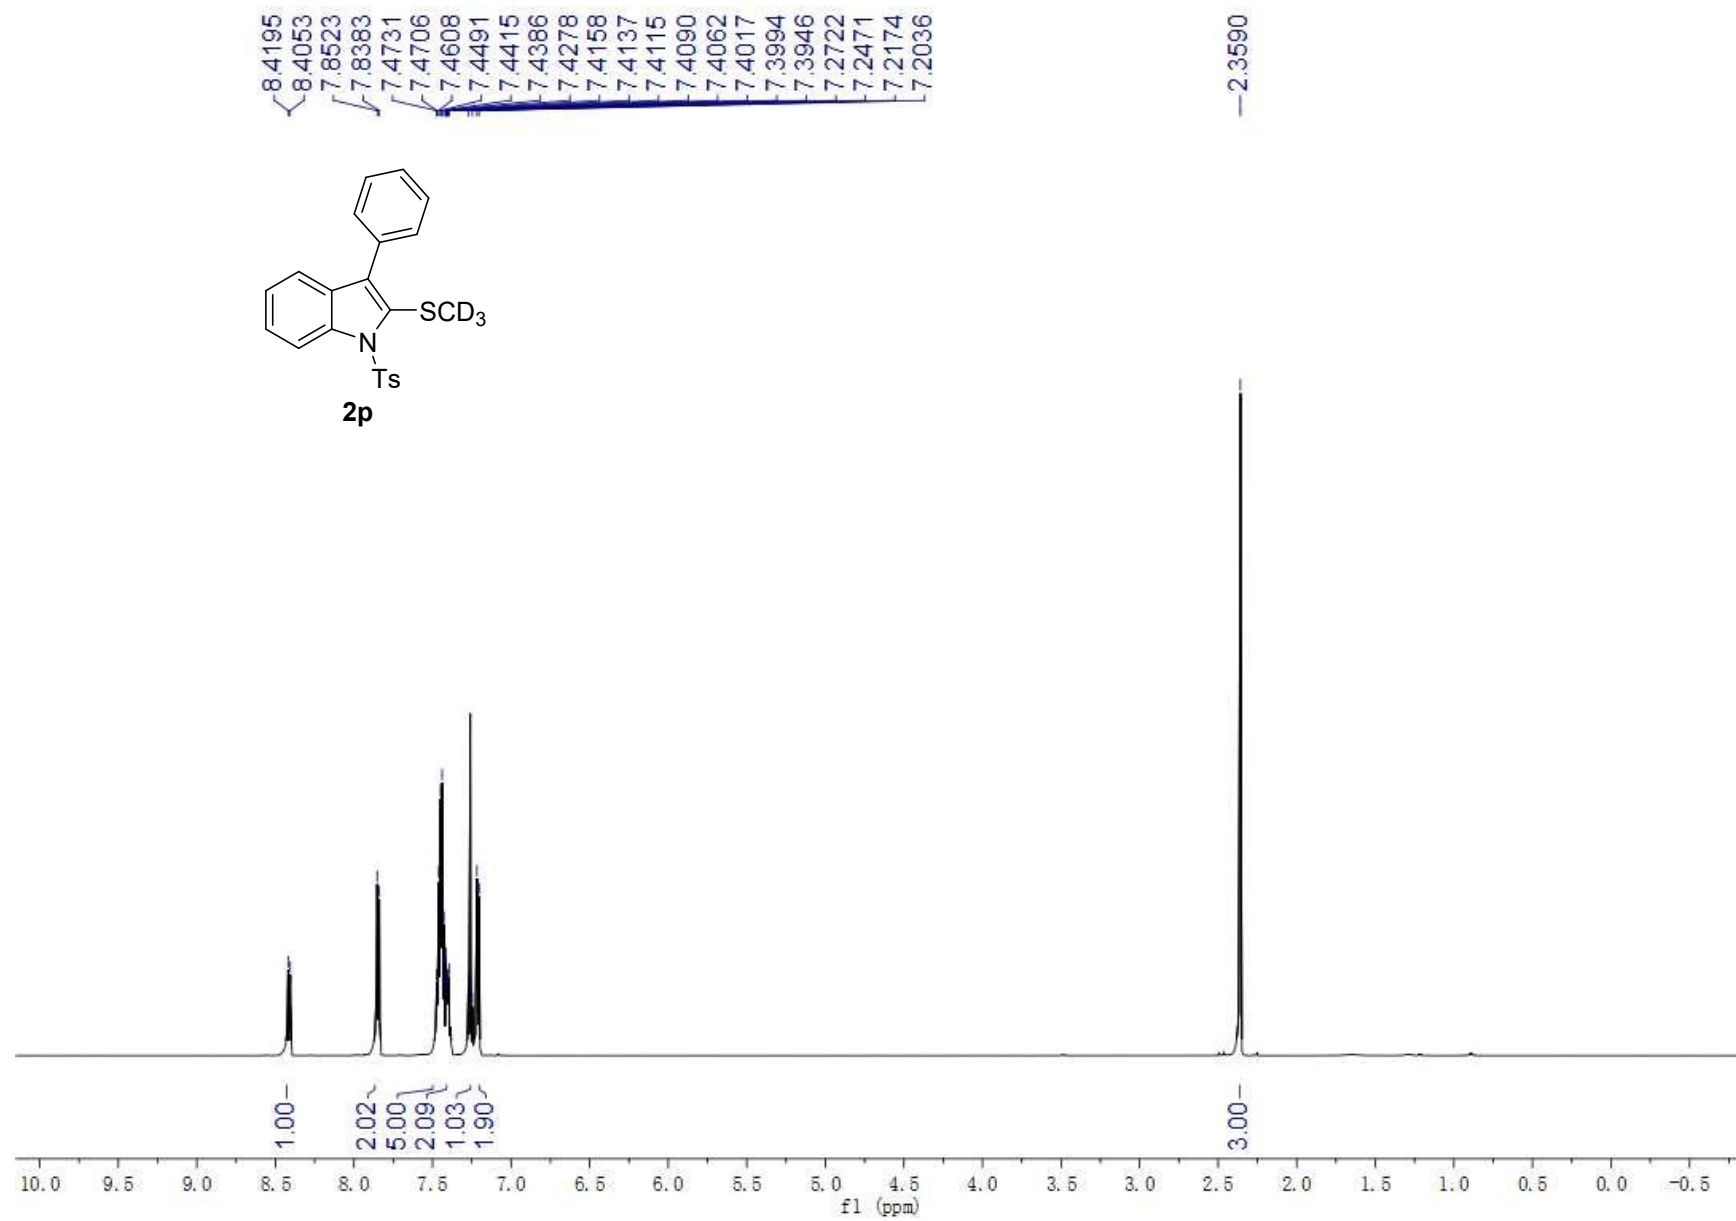

144.7241  
138.0579  
136.2080  
132.6519  
131.5833  
130.1251  
129.8430  
129.5486  
128.3229  
127.8268  
127.2823  
125.8925  
123.7733  
120.0262  
115.5708

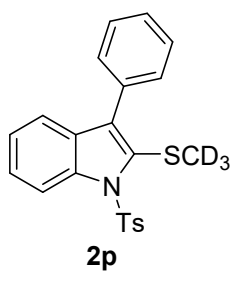

-21.5956

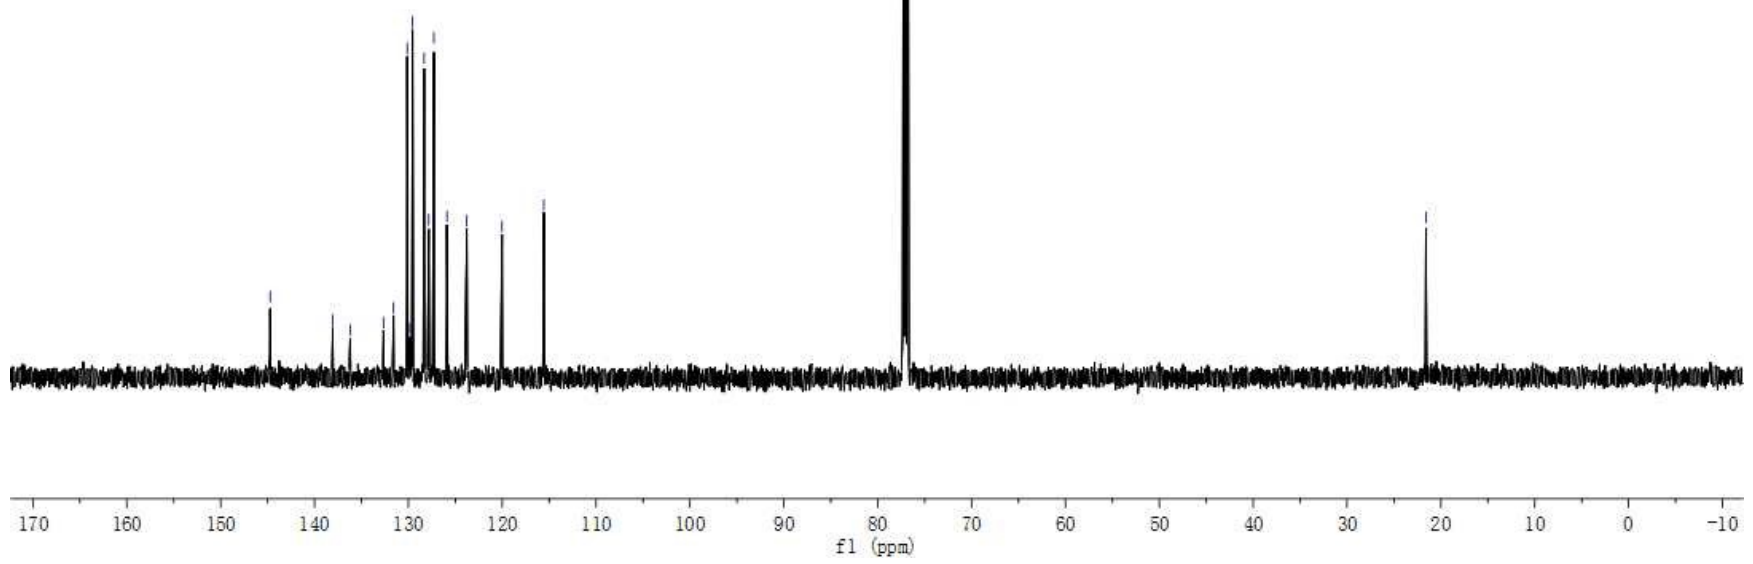

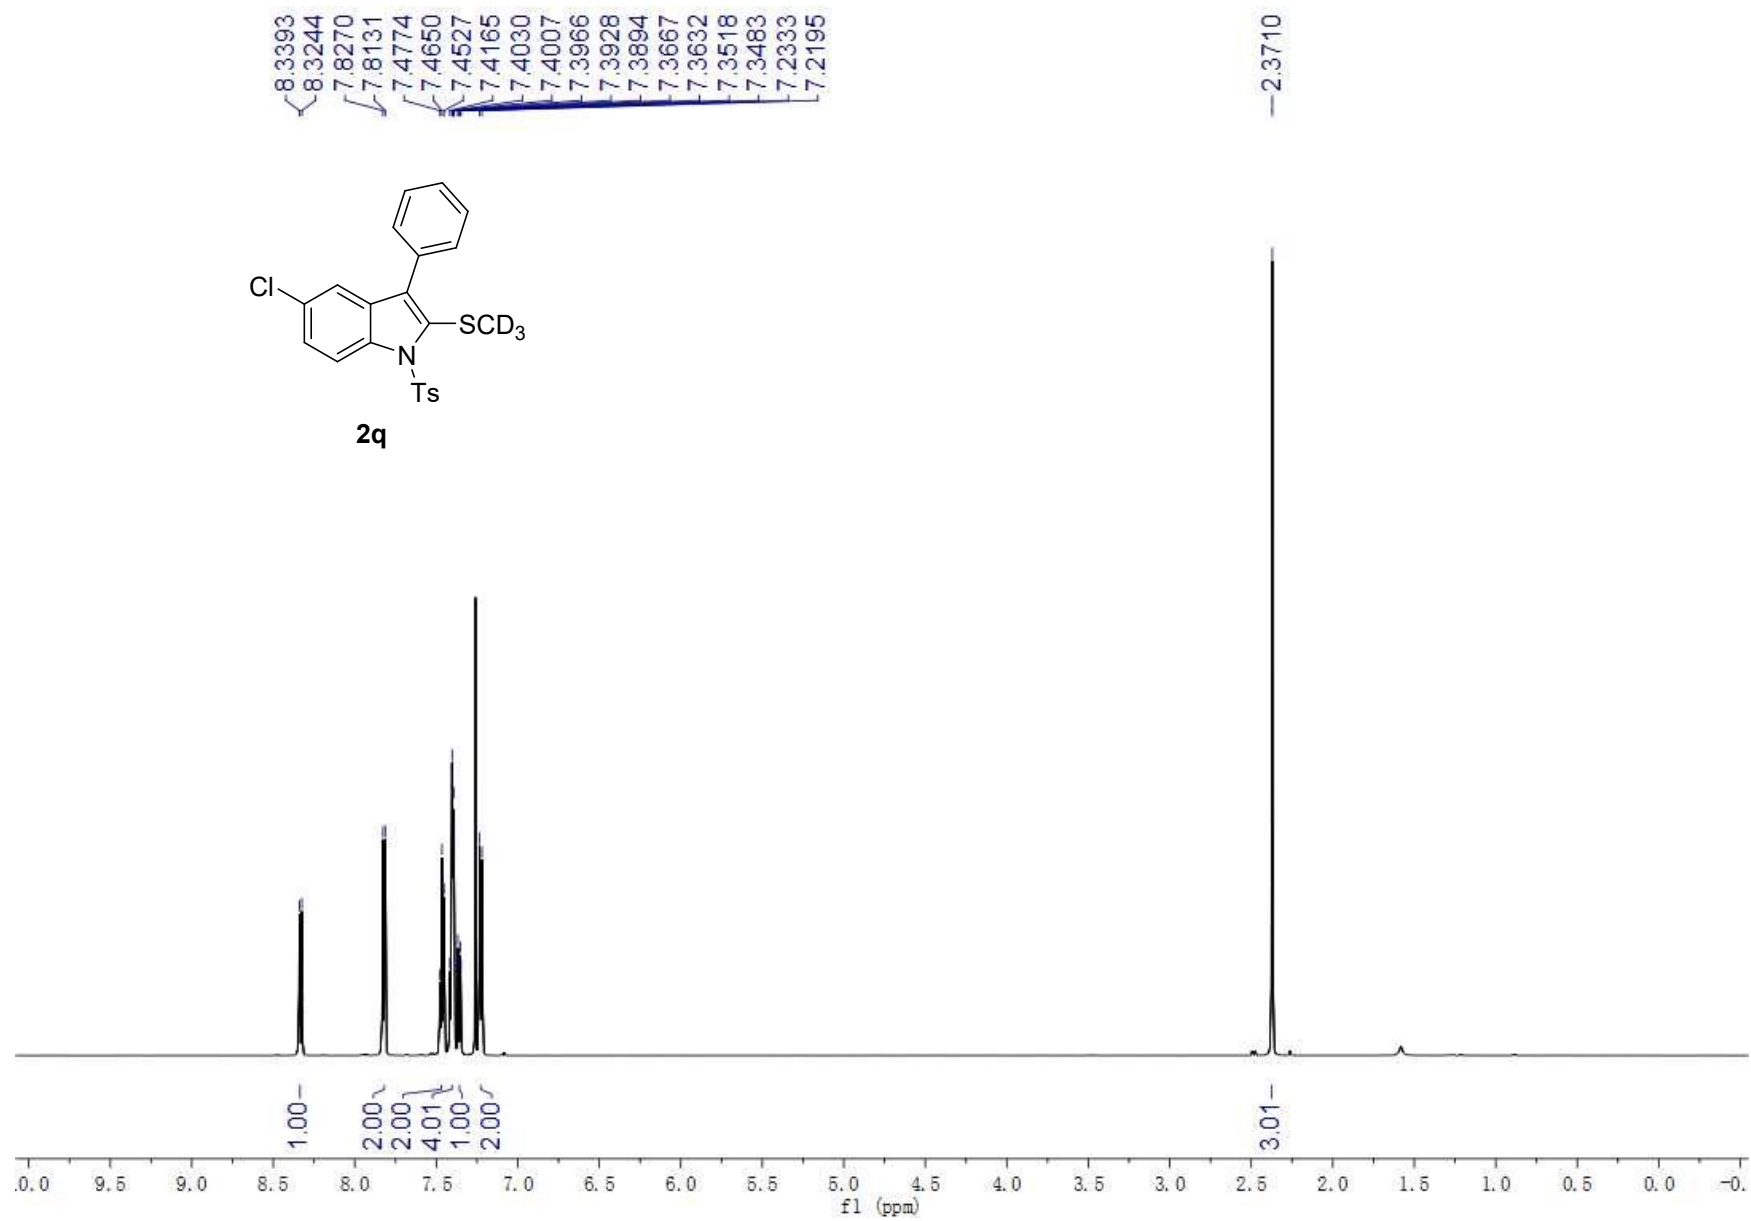

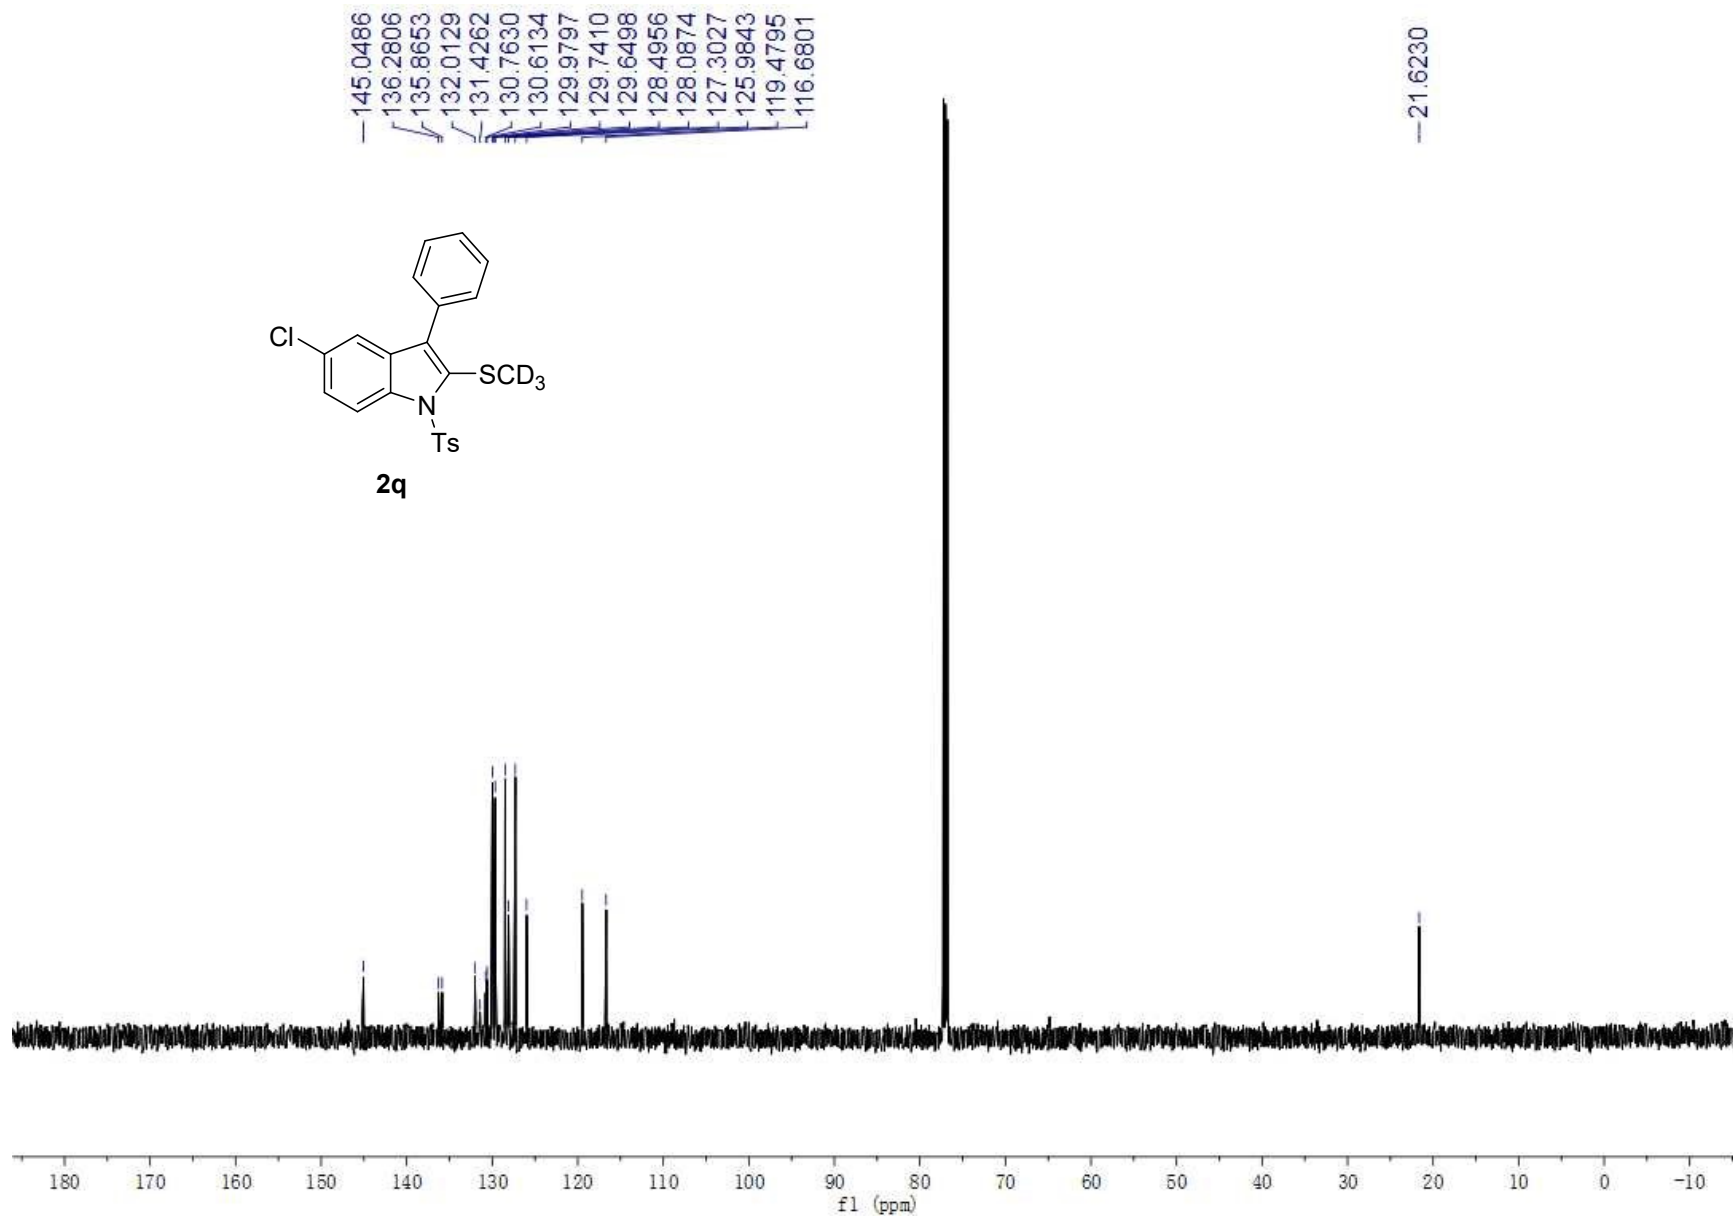

8.4192  
8.4050  
7.8521  
7.8382  
7.5970  
7.5933  
7.5905  
7.5822  
7.5793  
7.5754  
7.4359  
7.4220  
7.4077  
7.3942  
7.3260  
7.3222  
7.3195  
7.3111  
7.3082  
7.3043  
7.2786  
7.2664  
7.2536  
7.2233  
7.2096

-2.3627

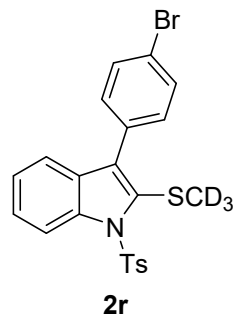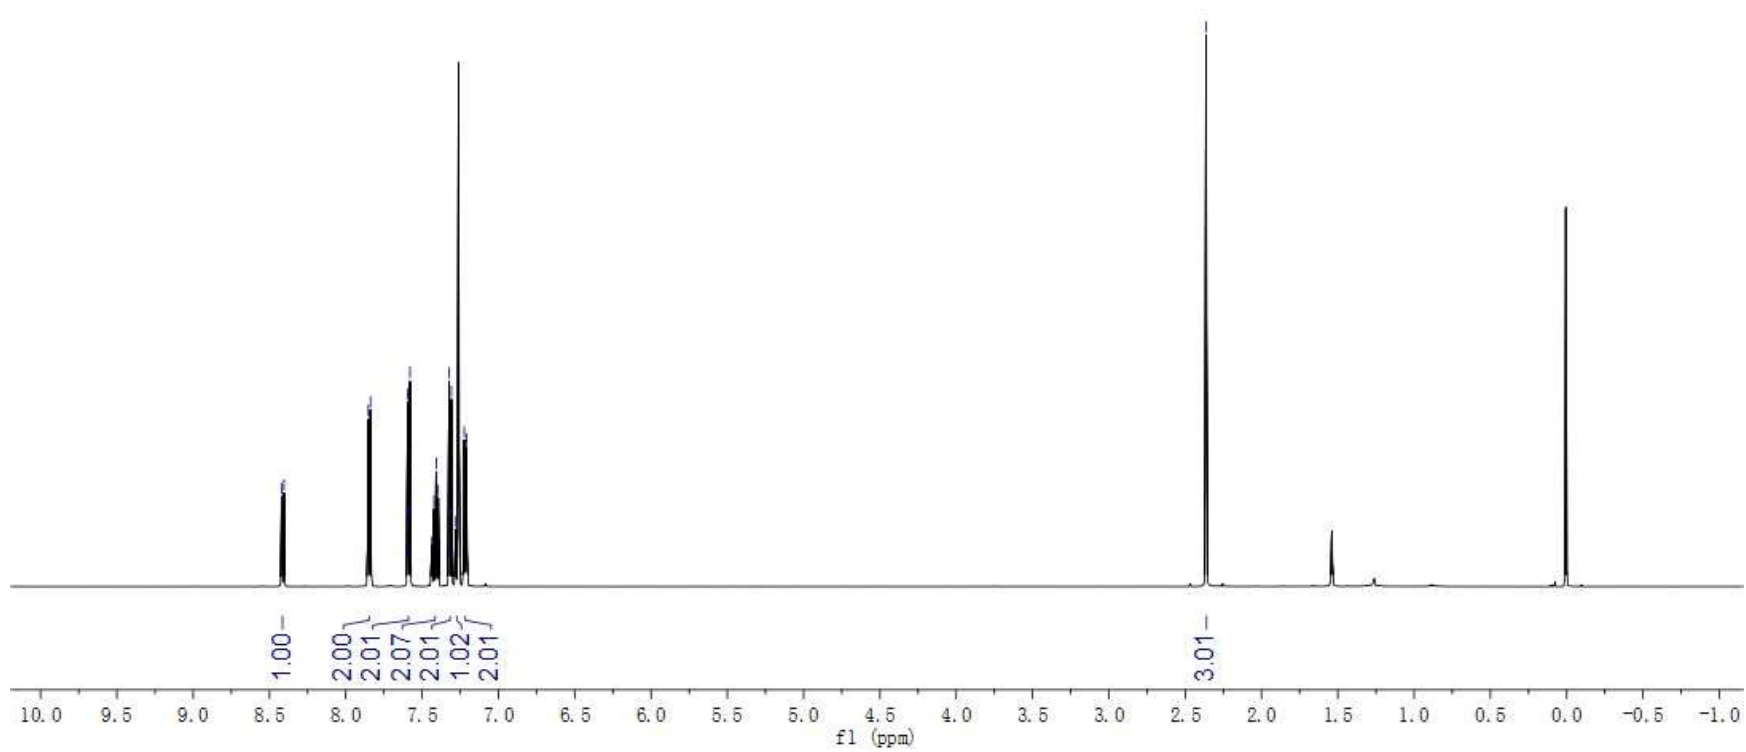



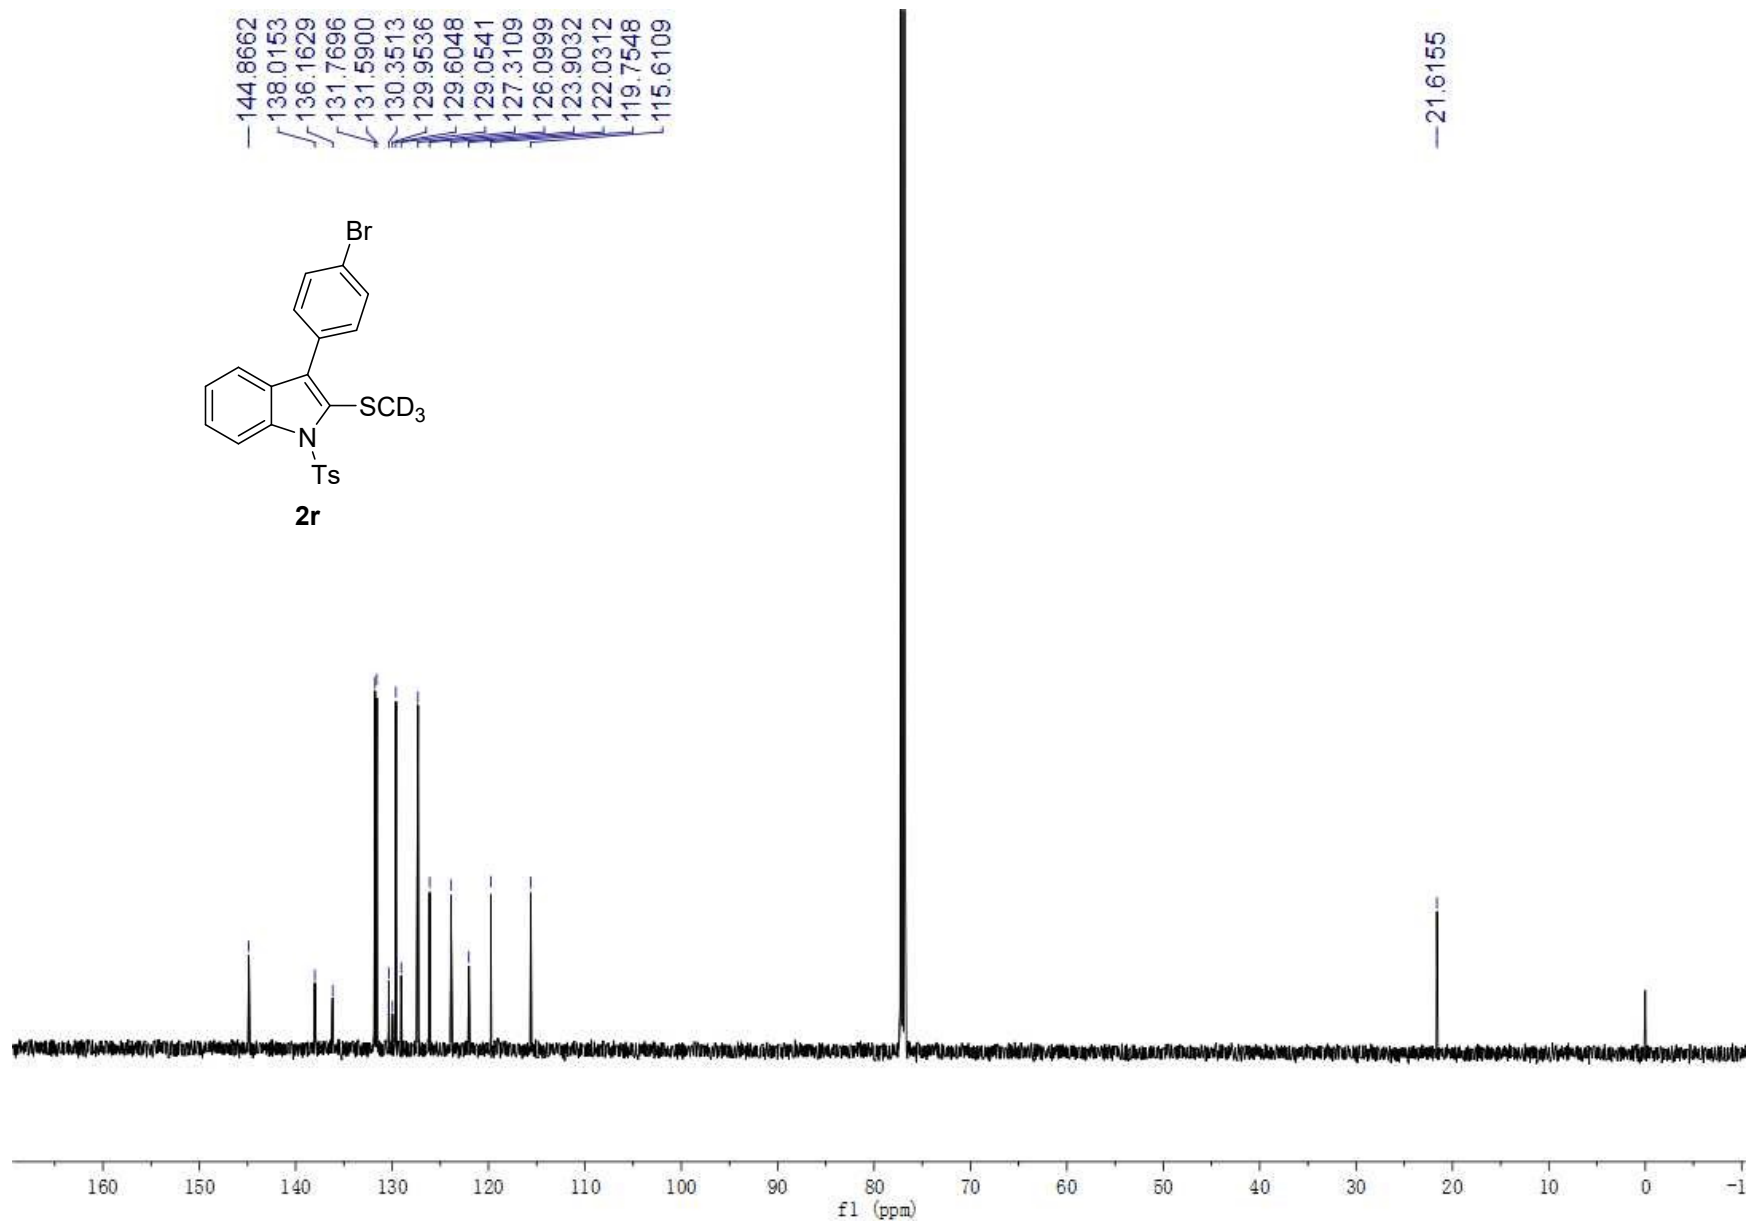

8.3512  
8.3495  
8.3478  
8.3302  
8.3284  
7.7921  
7.7873  
7.7829  
7.7707  
7.7663  
7.7614  
7.4462  
7.4446  
7.4433  
7.4417  
7.4269  
7.4252  
7.4239  
7.4223  
7.4051  
7.4017  
7.3870  
7.3838  
7.3806  
7.3659  
7.3625  
7.2944  
7.2920  
7.2748  
7.2546  
7.1802  
7.1599

2.3328  
2.3076

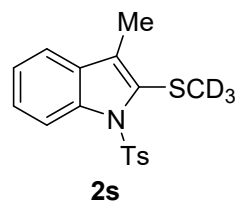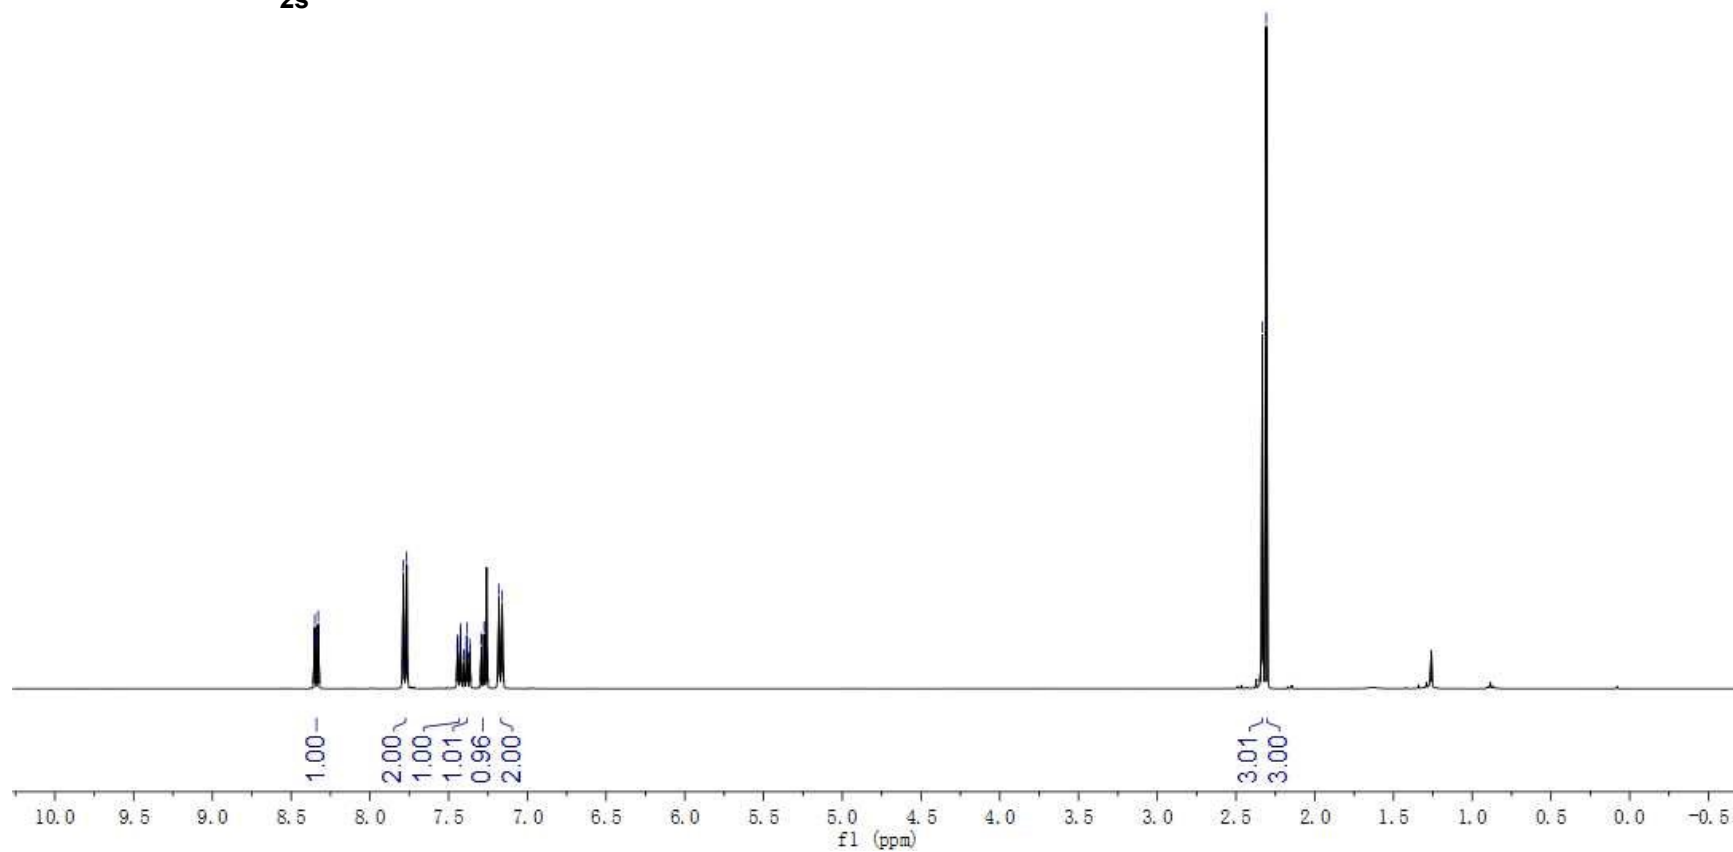

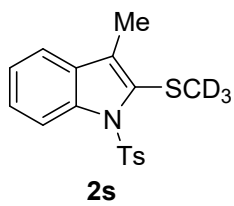

144.5157  
137.9469  
136.2410  
130.2205  
129.5055  
129.1535  
127.4175  
127.1370  
125.8176  
123.3884  
119.2713  
115.4606

-21.6097

-10.2172

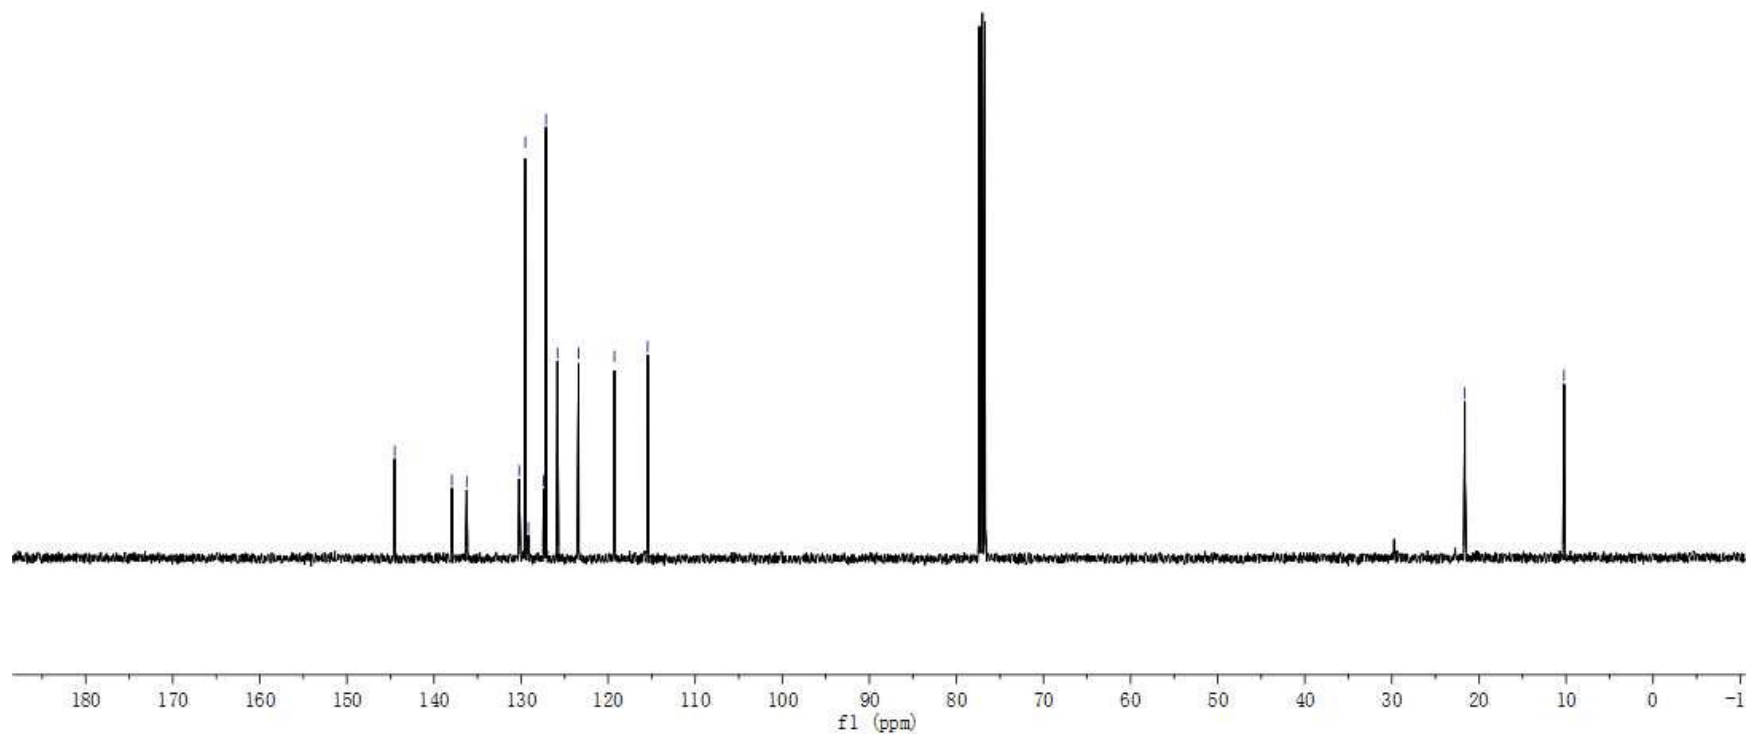

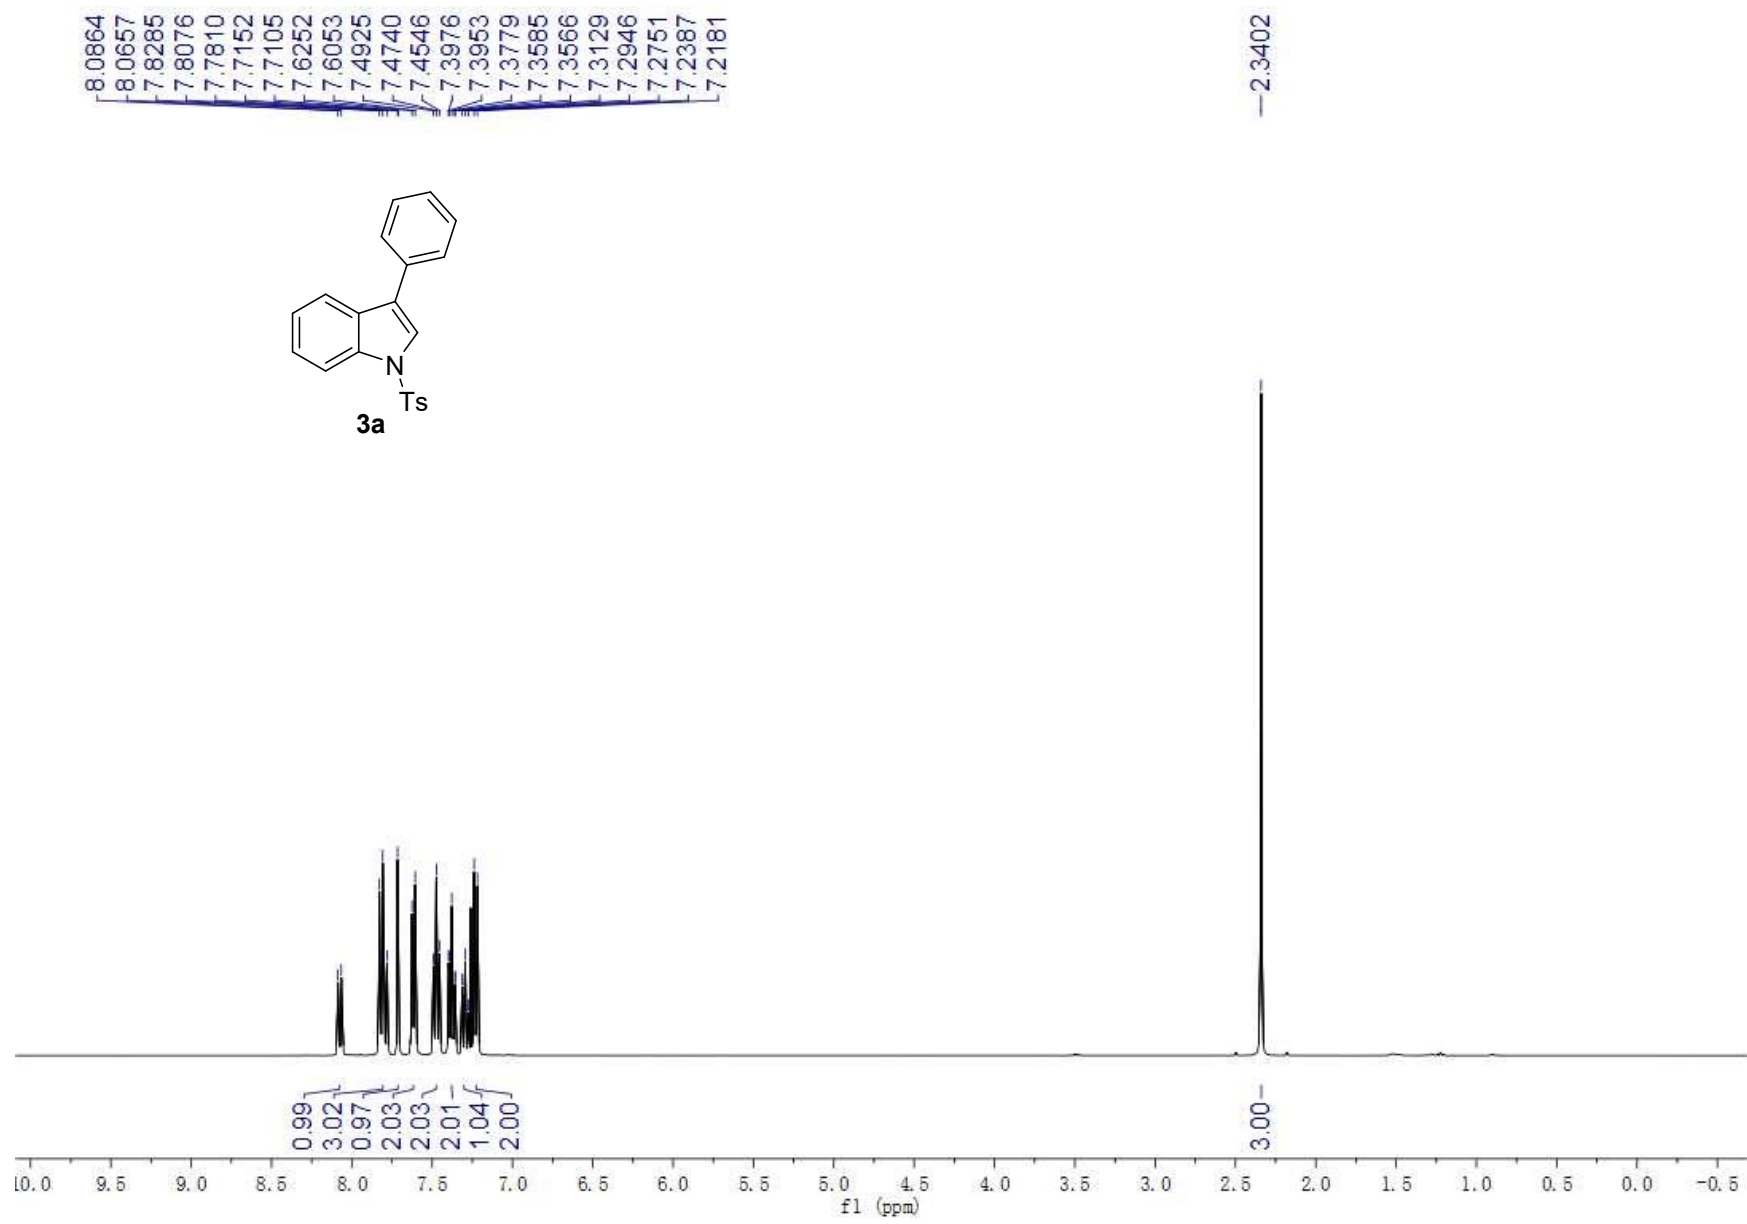

145.0543  
133.1066  
129.9617  
128.9411  
127.9327  
127.5714  
126.9229  
124.9168  
123.5796  
123.0091  
120.4827

21.5984

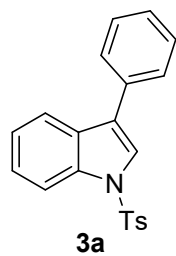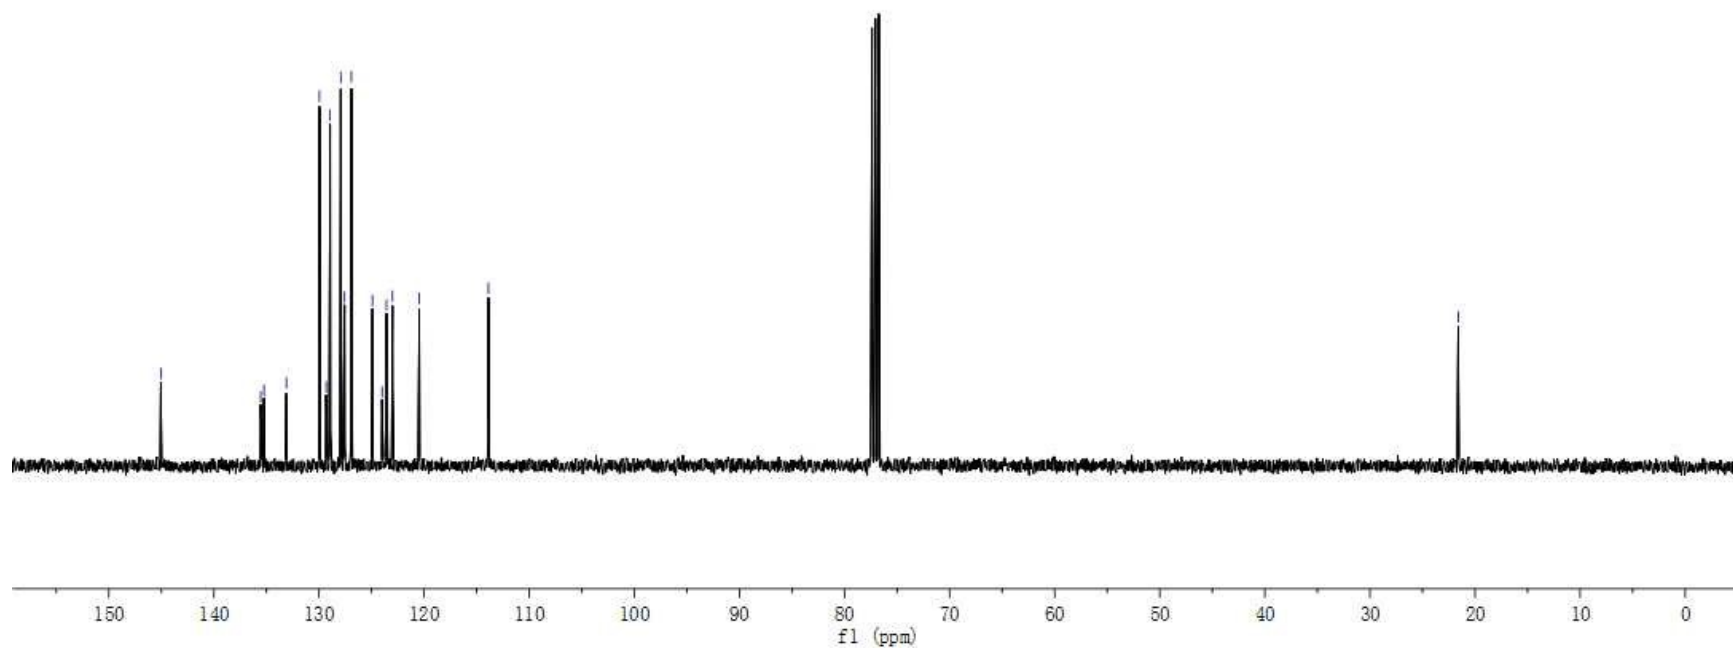

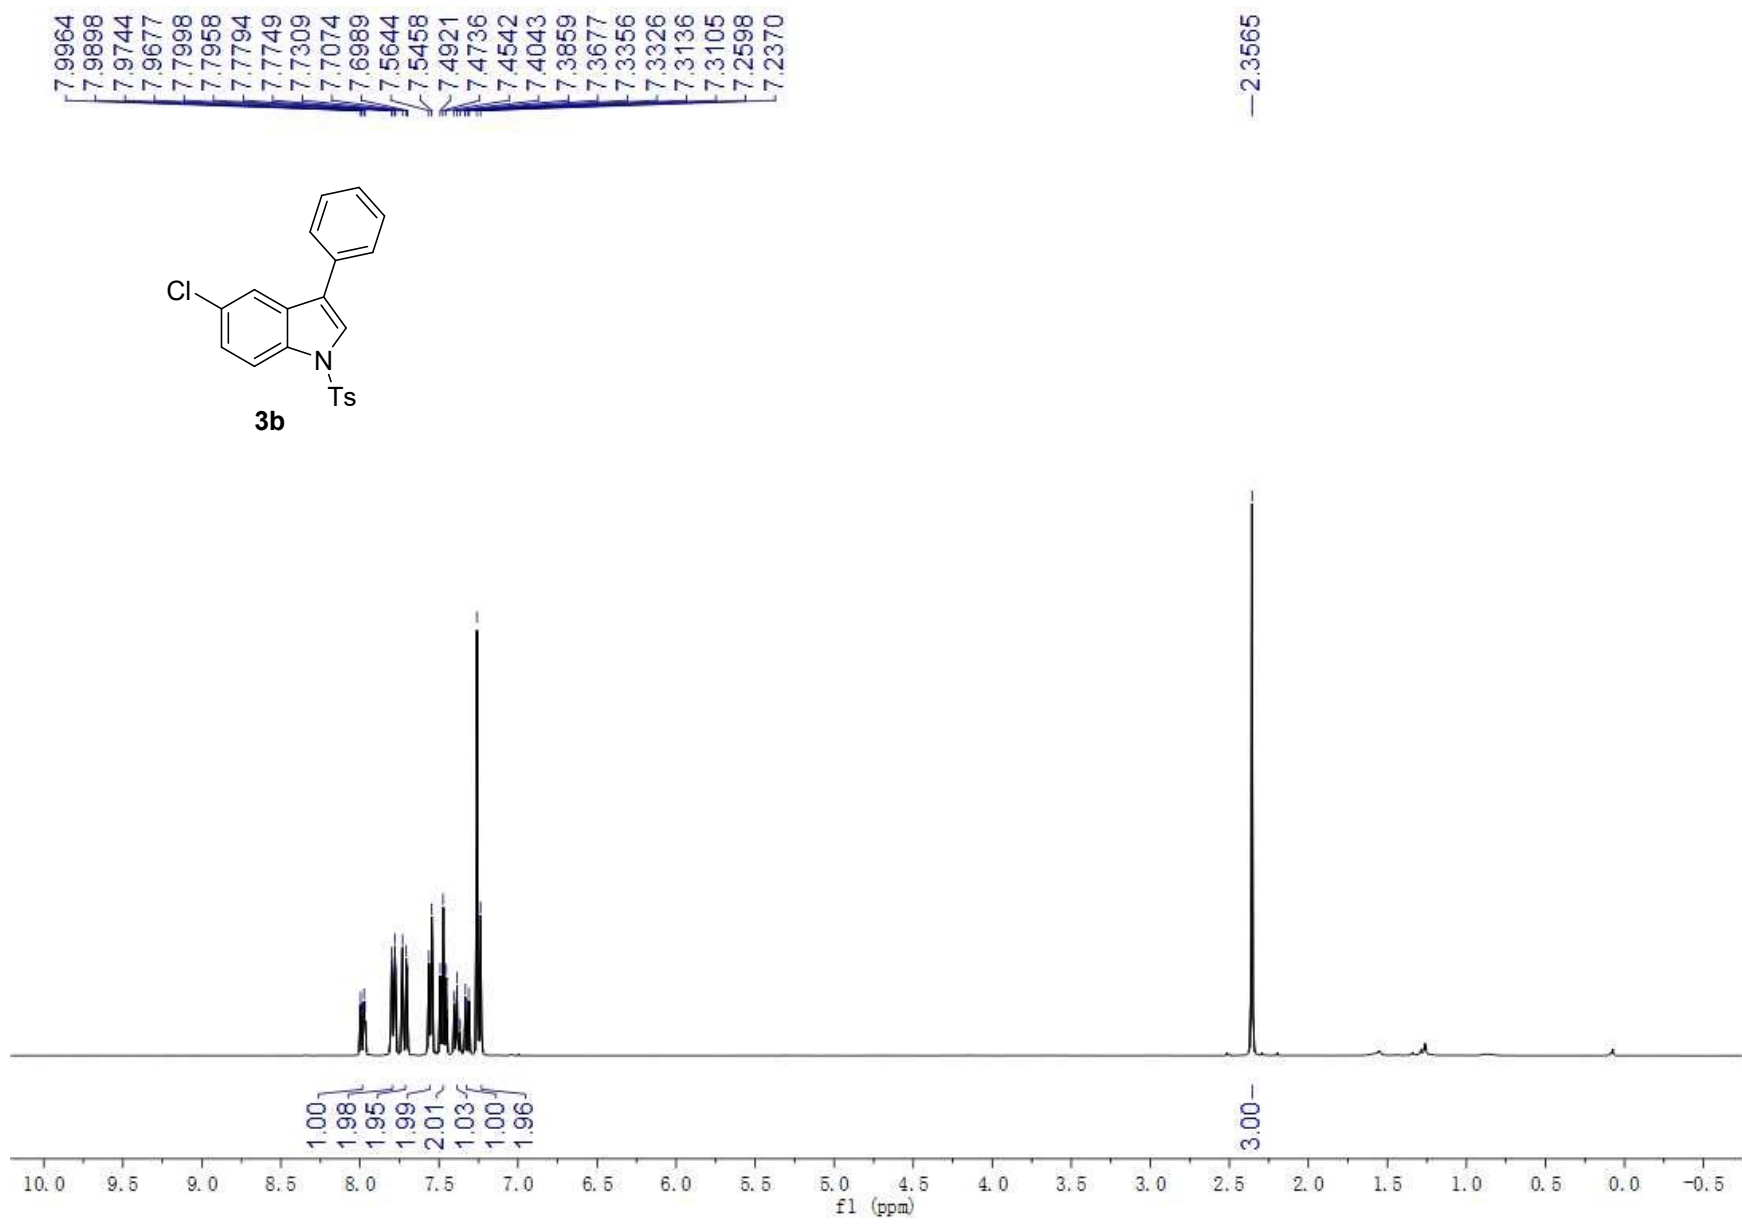

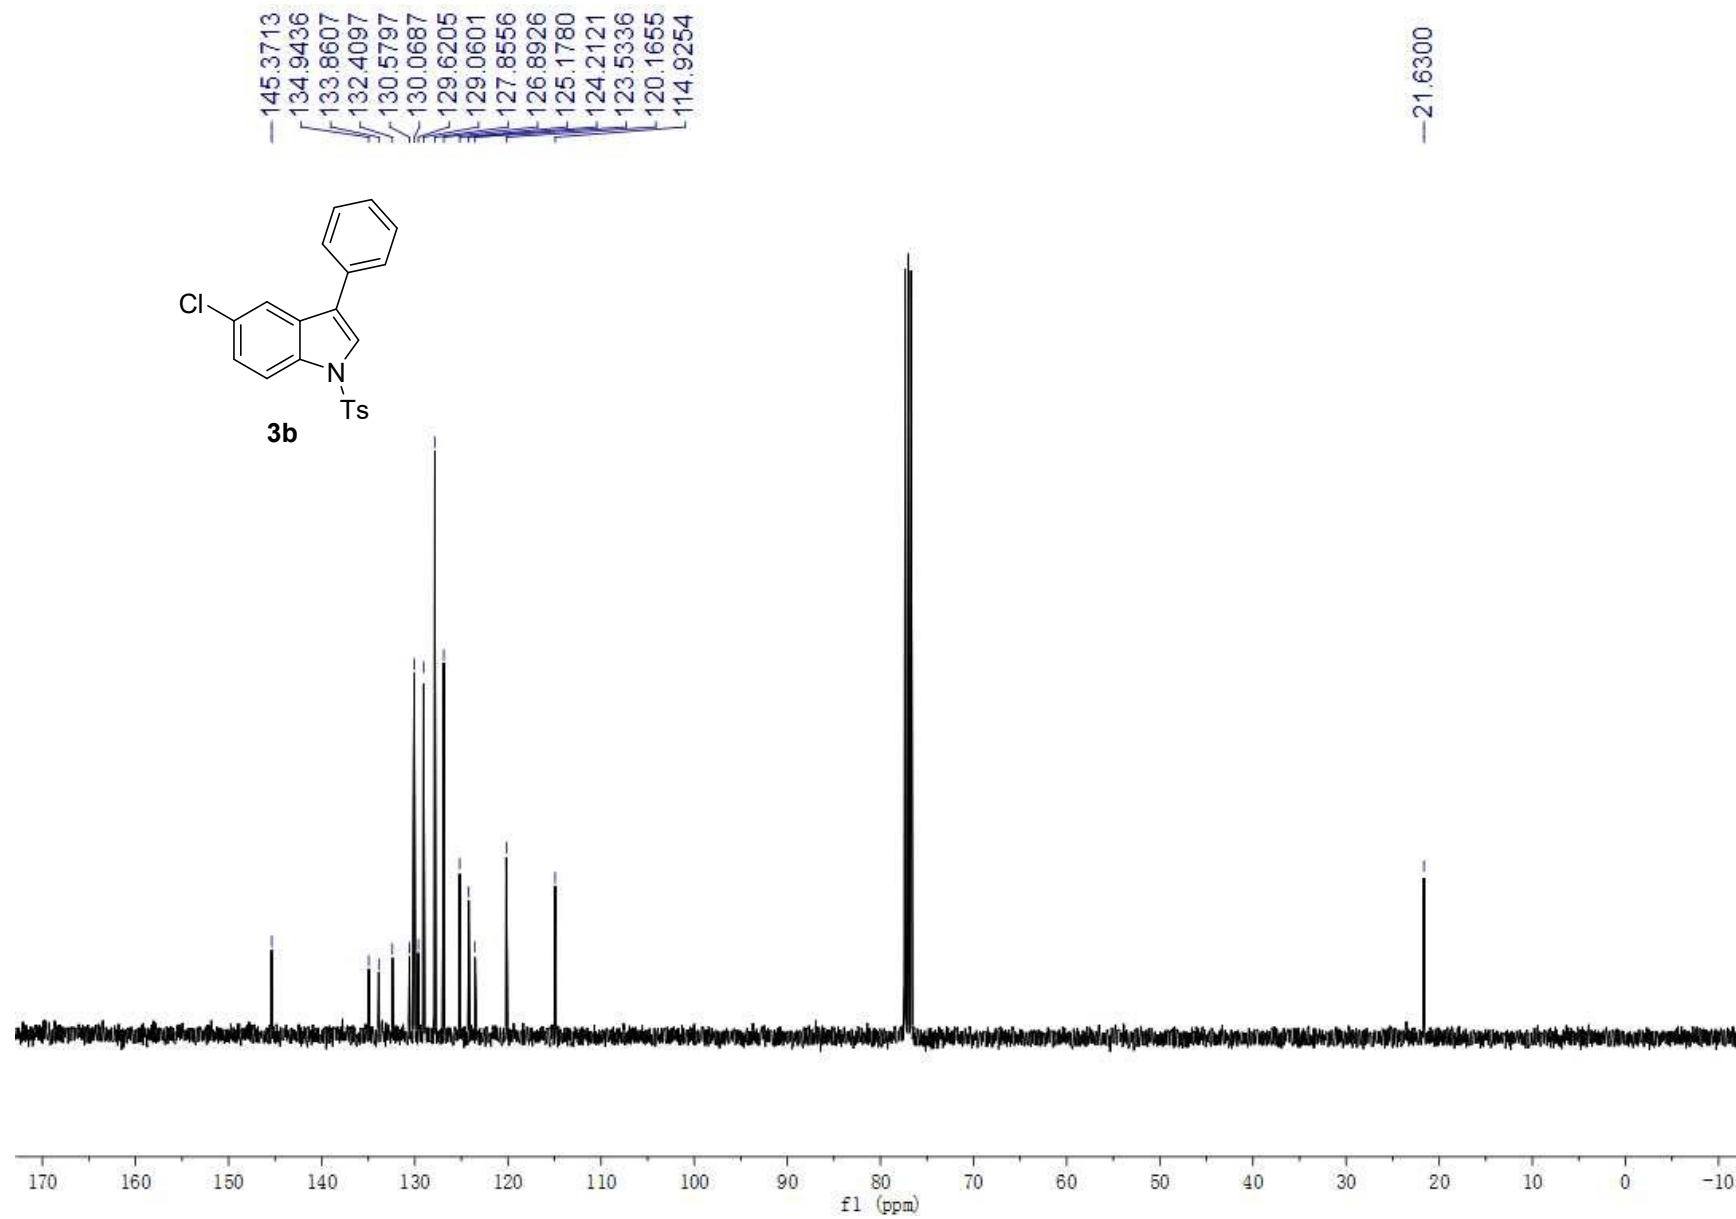

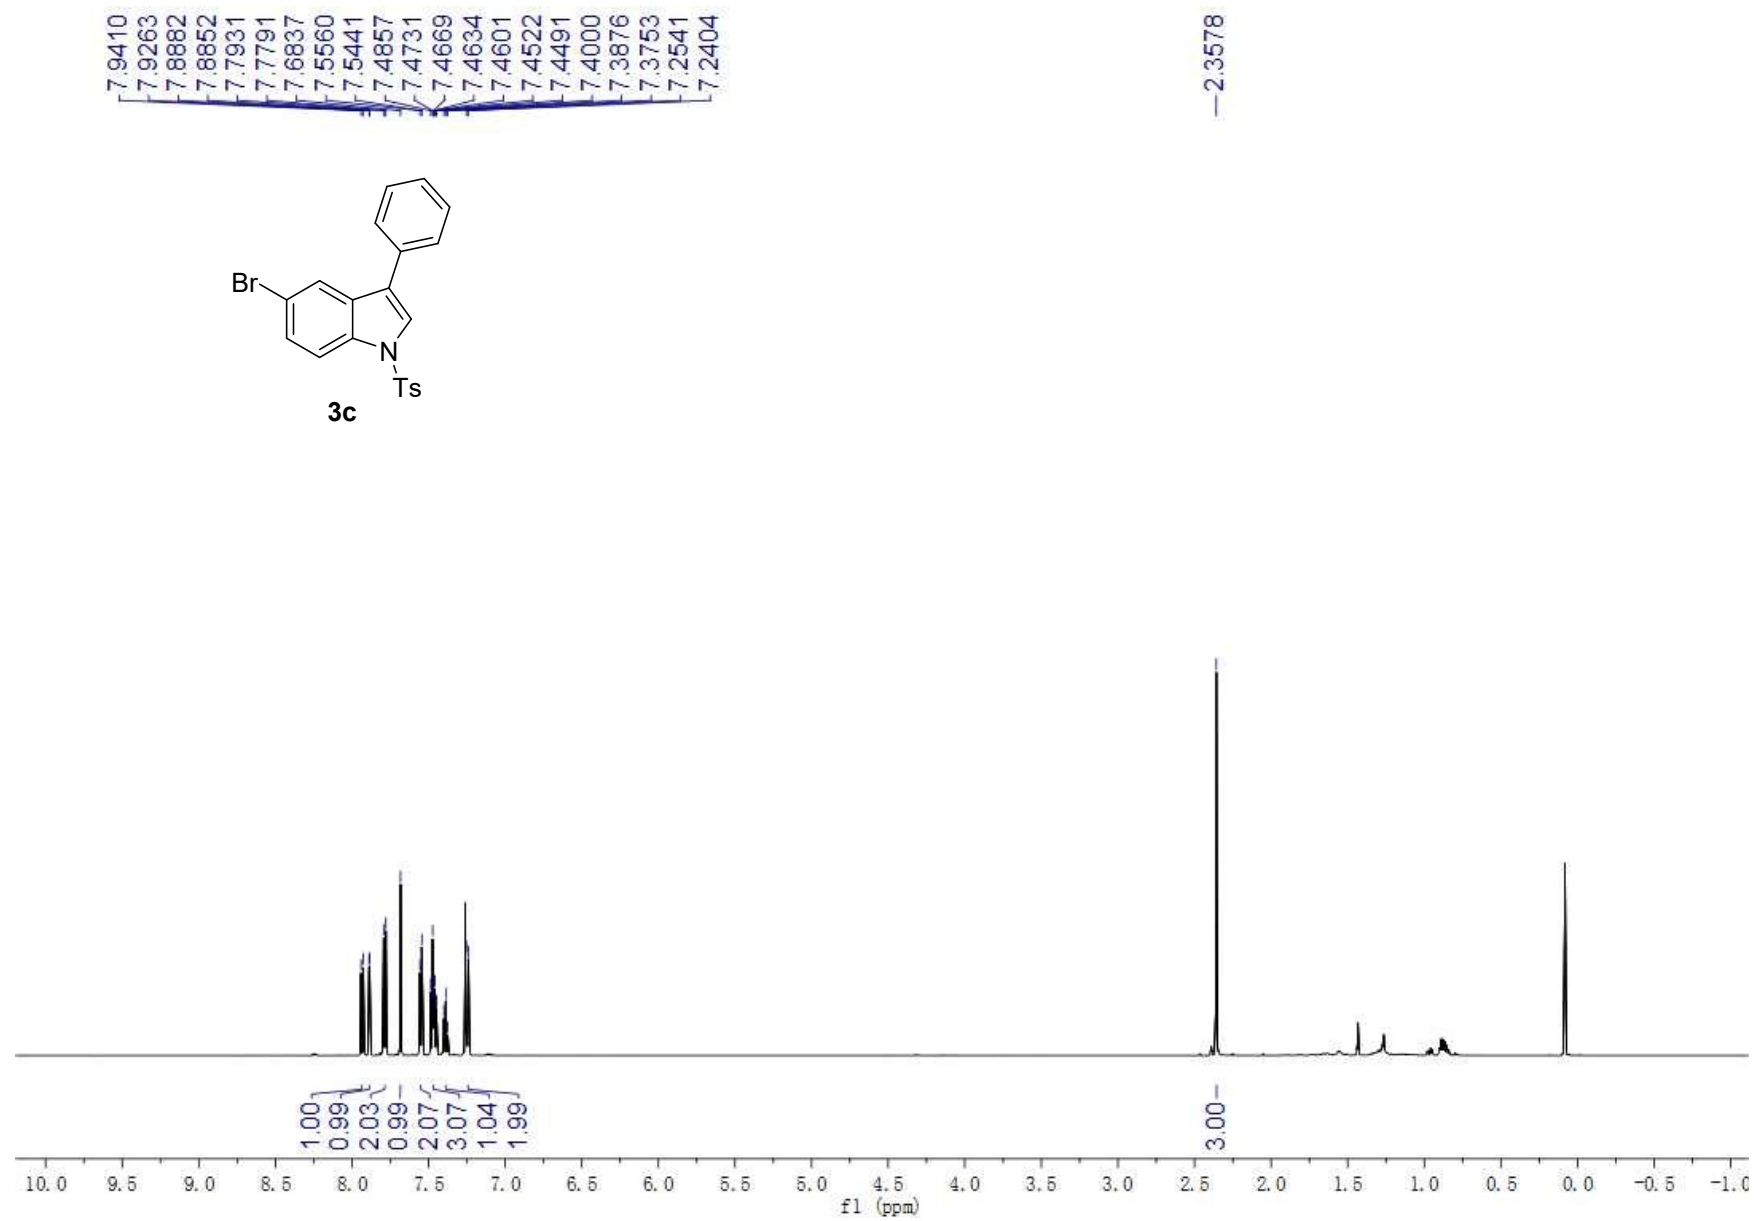



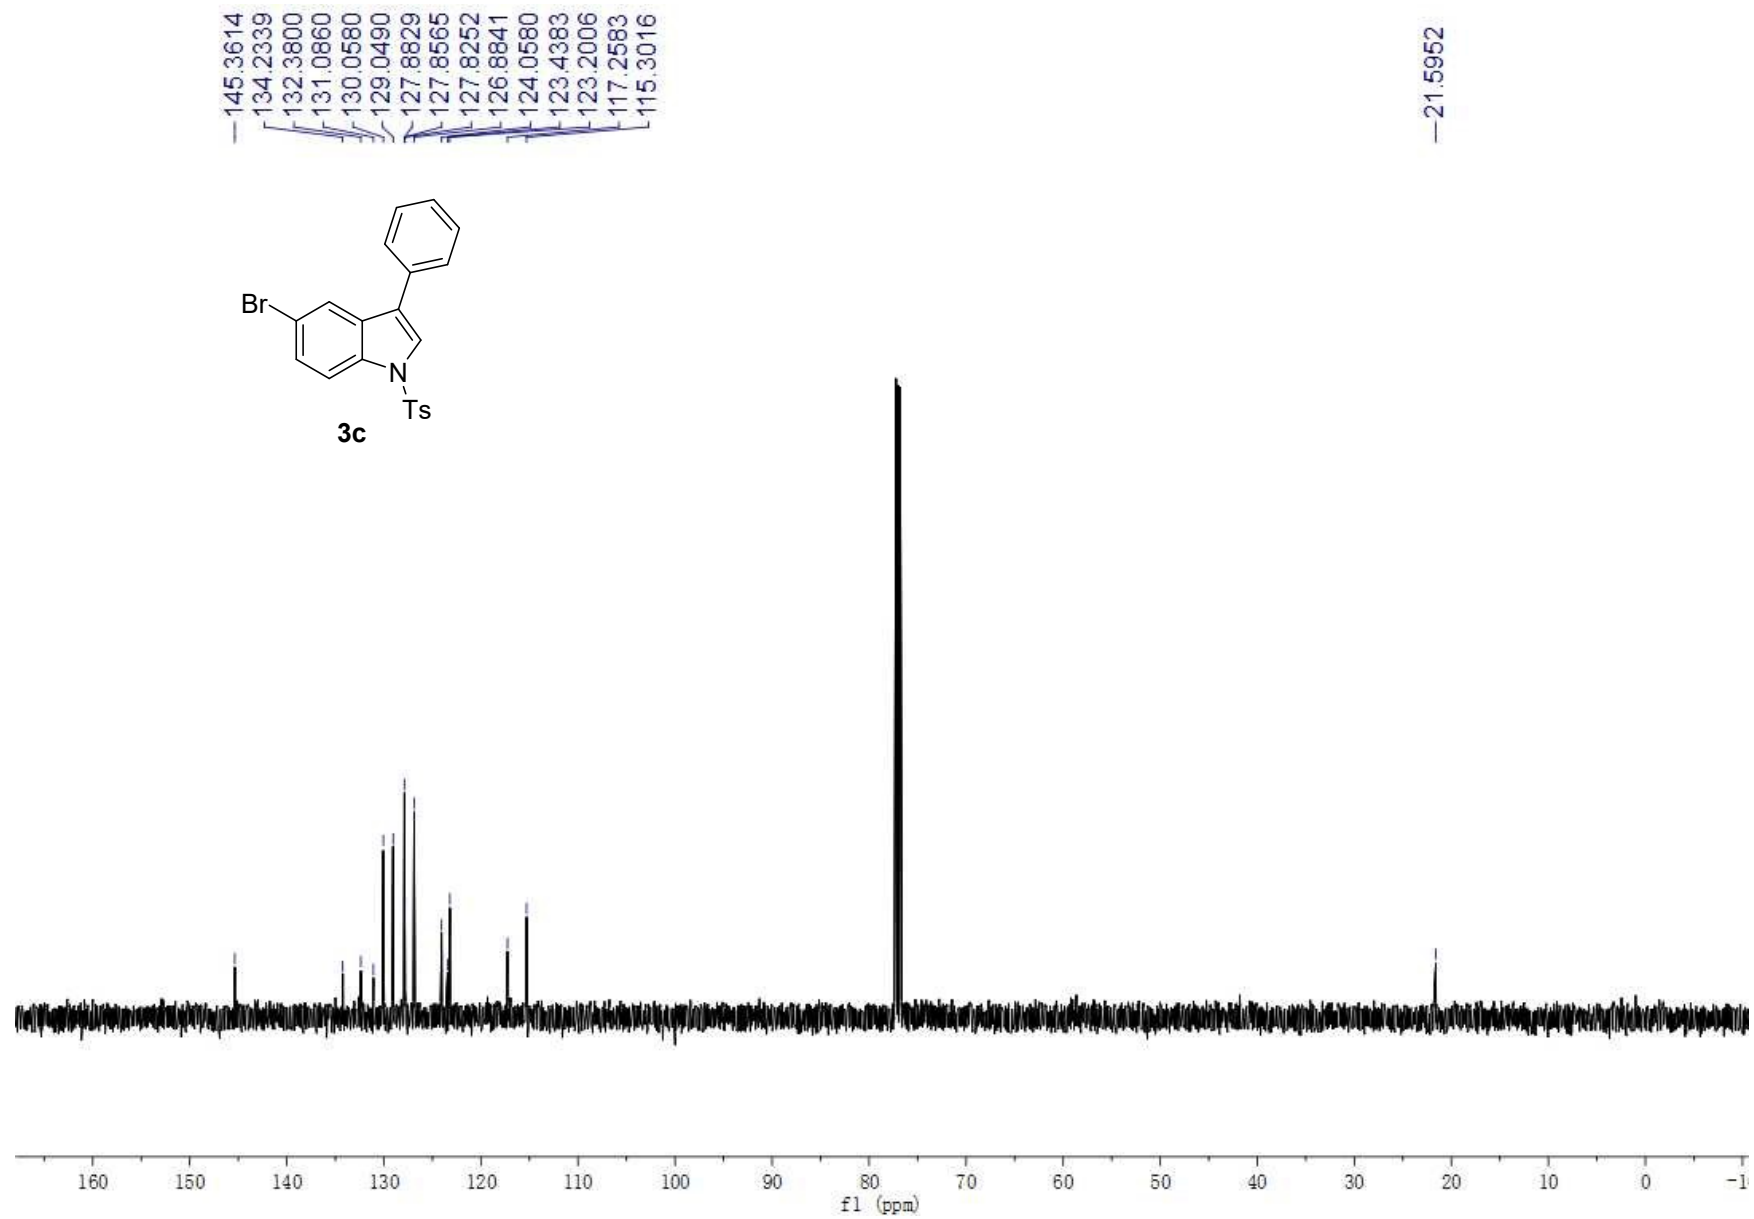

7.8722  
7.8088  
7.7948  
7.6622  
7.6487  
7.6303  
7.6072  
7.6051  
7.5934  
7.5922  
7.4688  
7.4563  
7.4432  
7.3735  
7.3612  
7.3488  
7.2390  
7.2254  
7.1219  
7.1092

2.5089  
2.3470

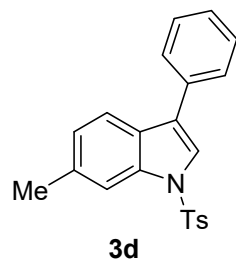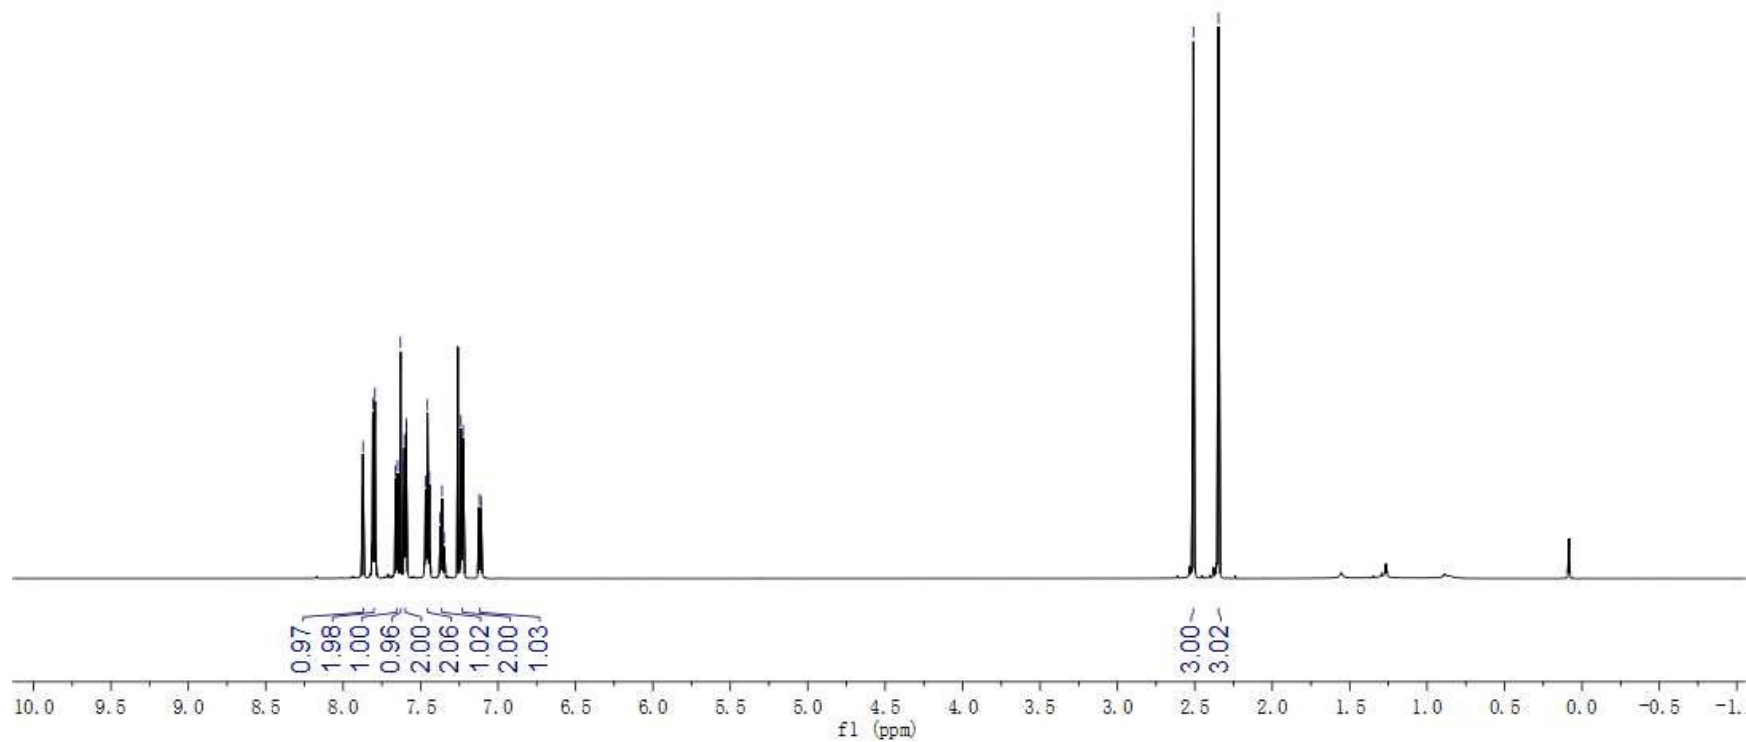

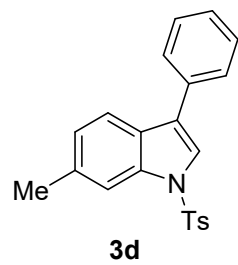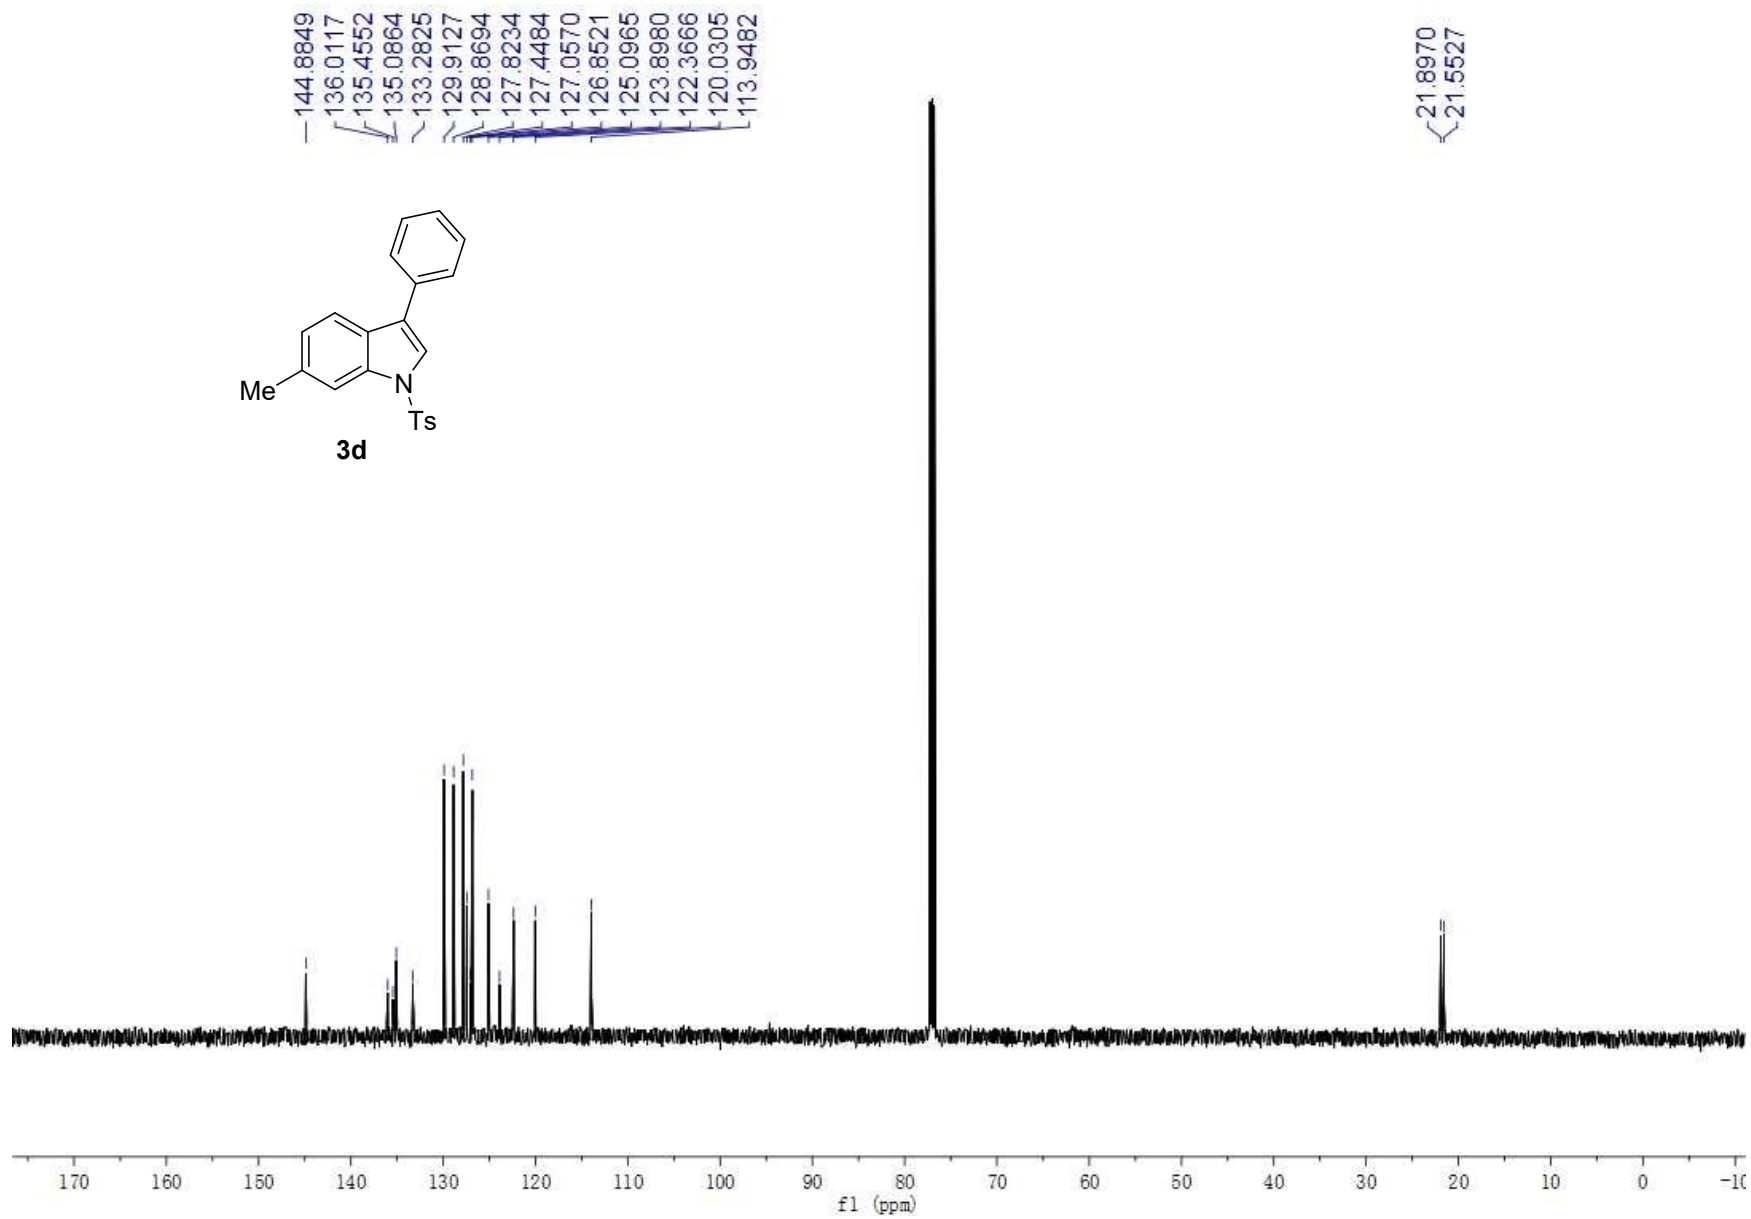

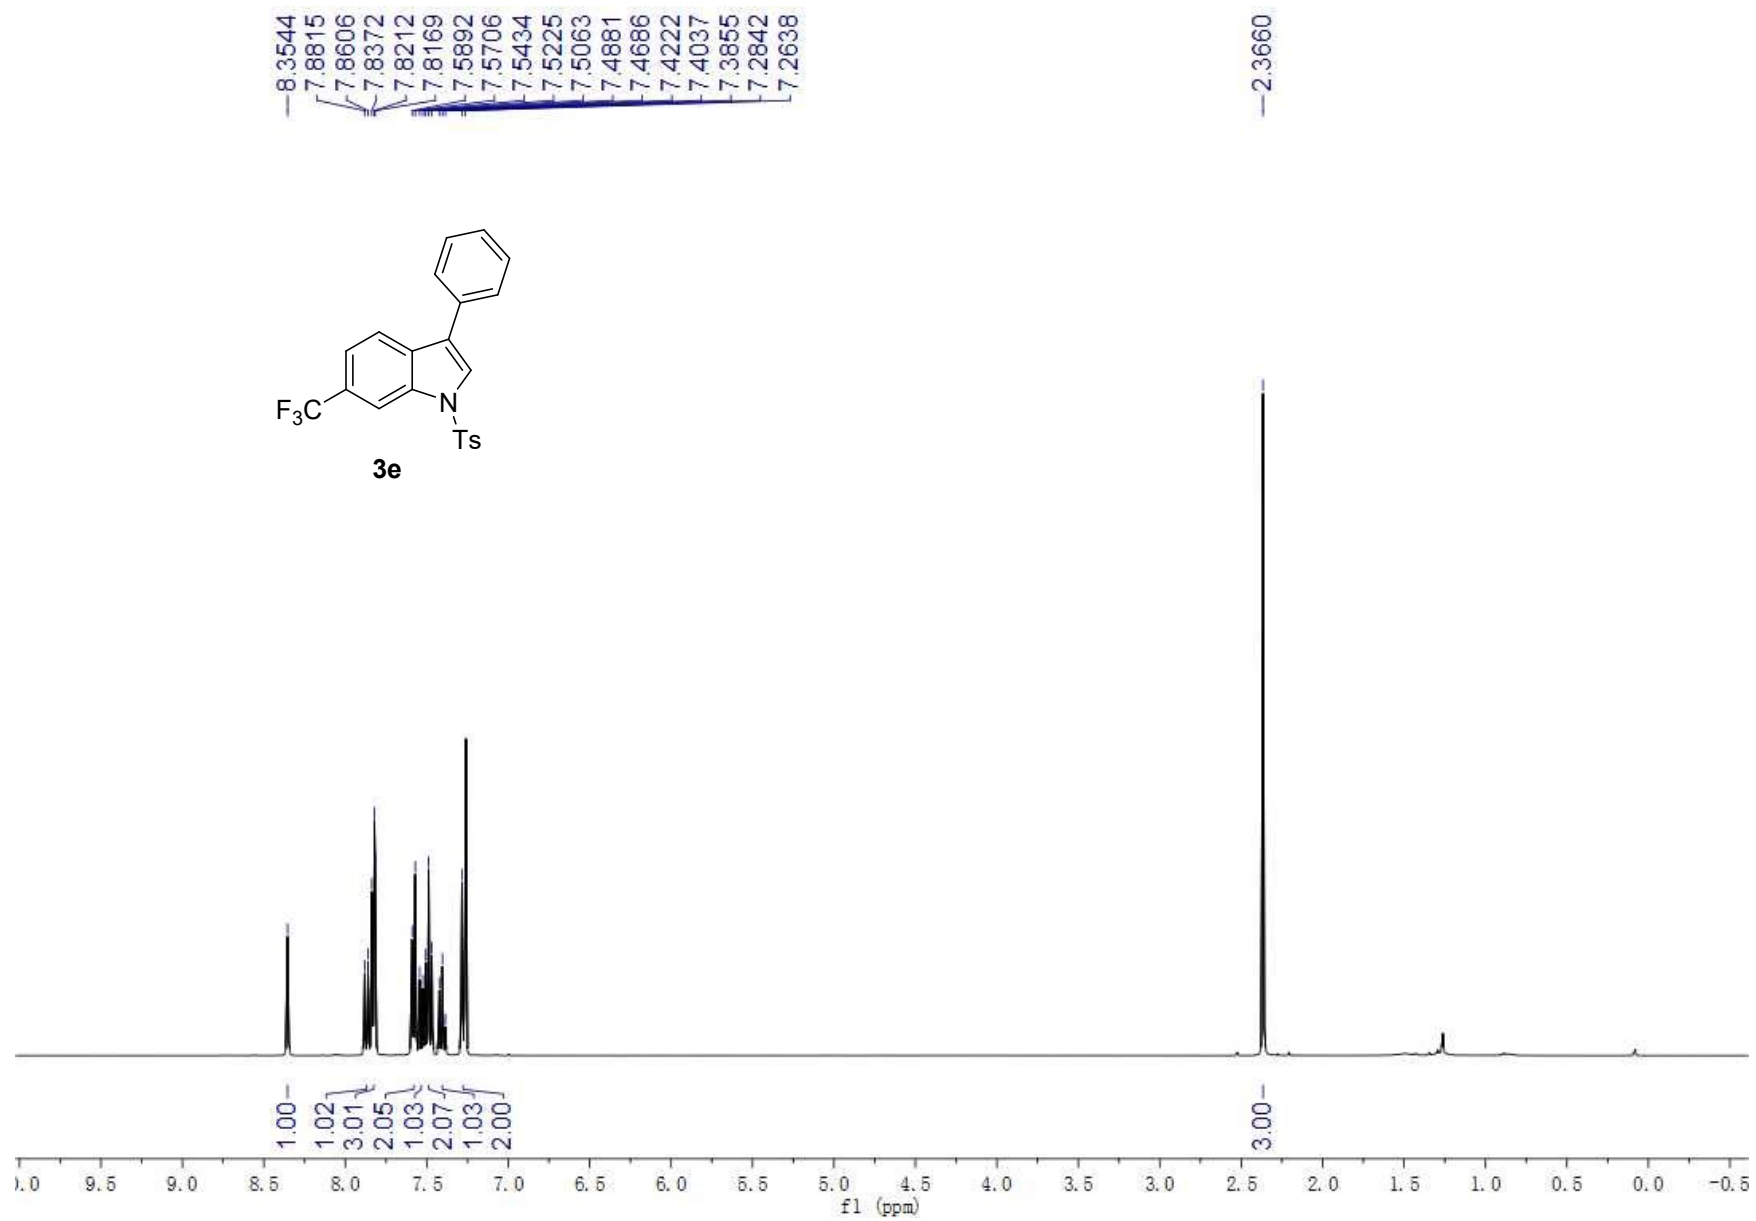

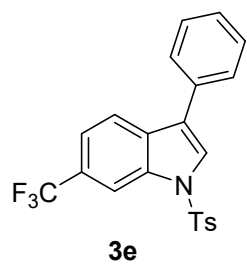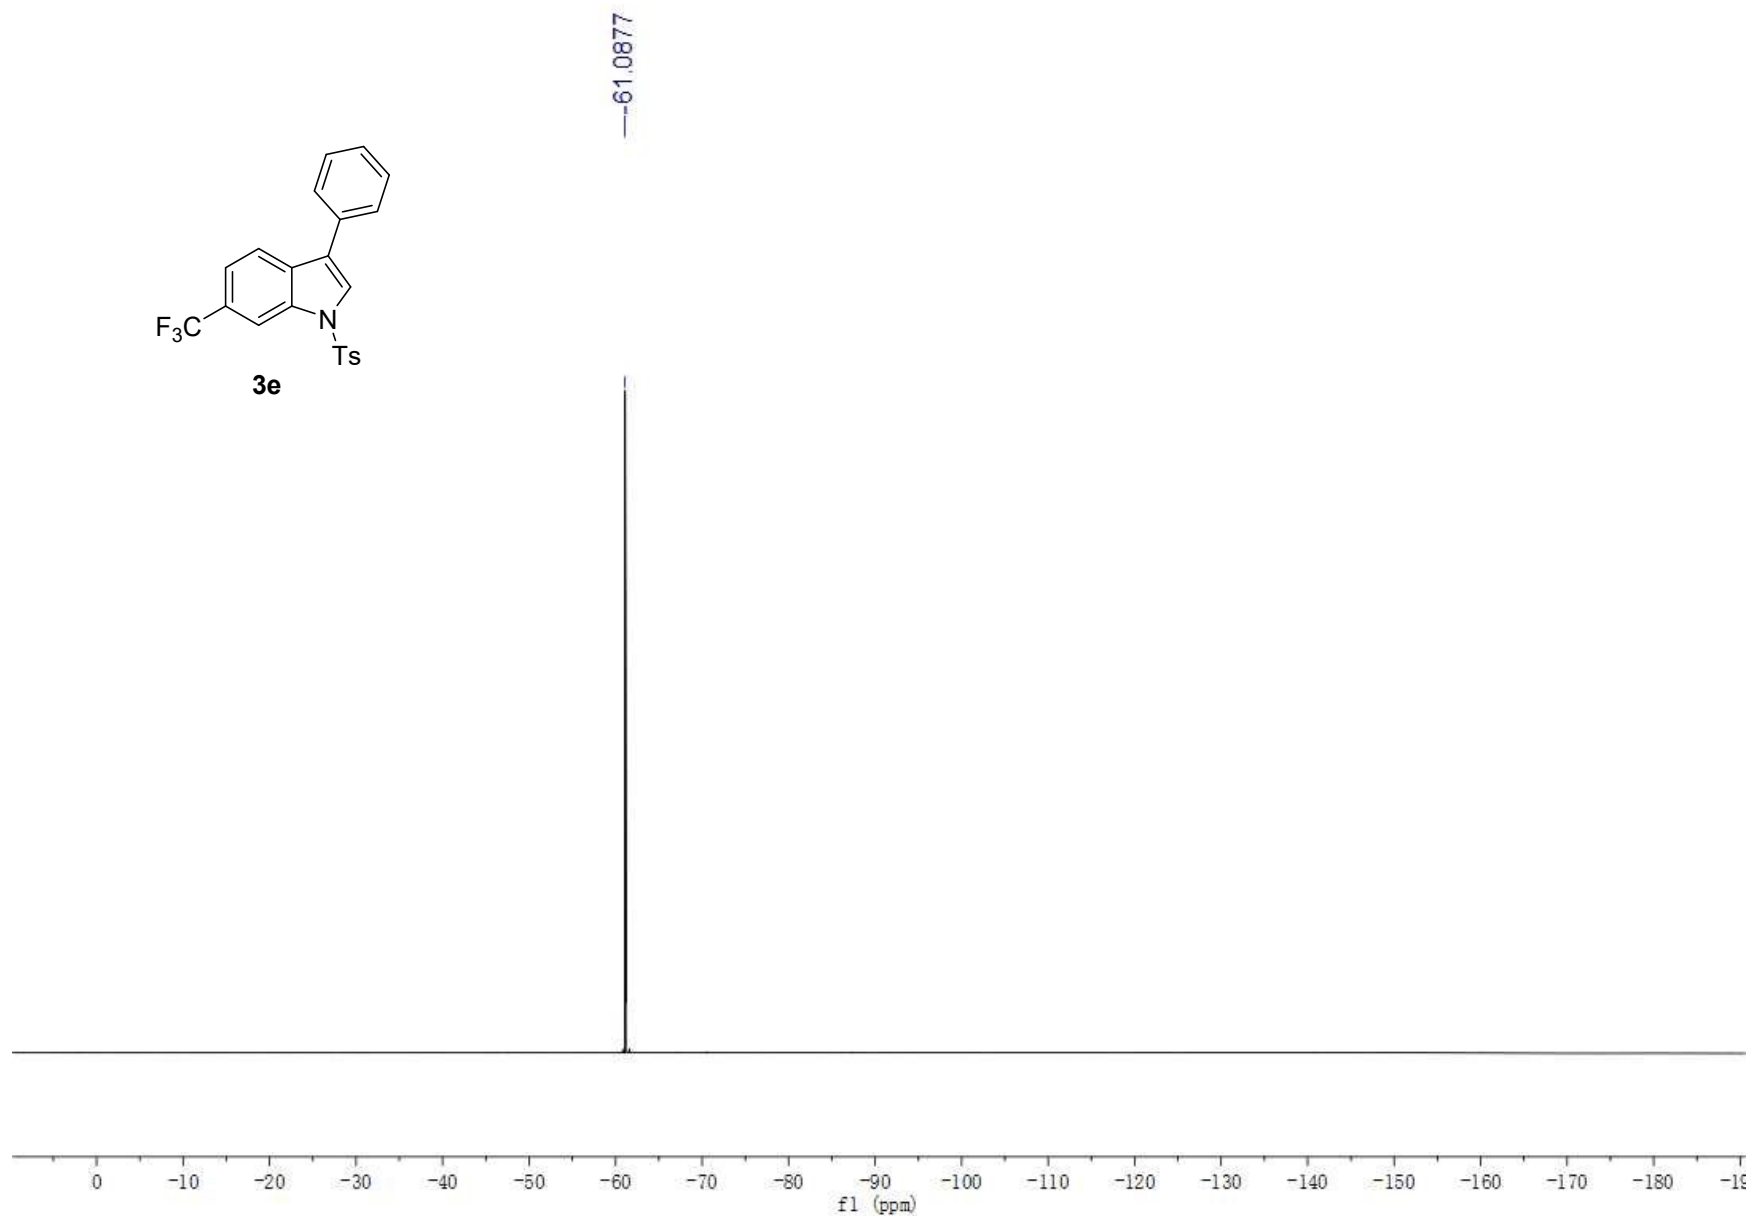

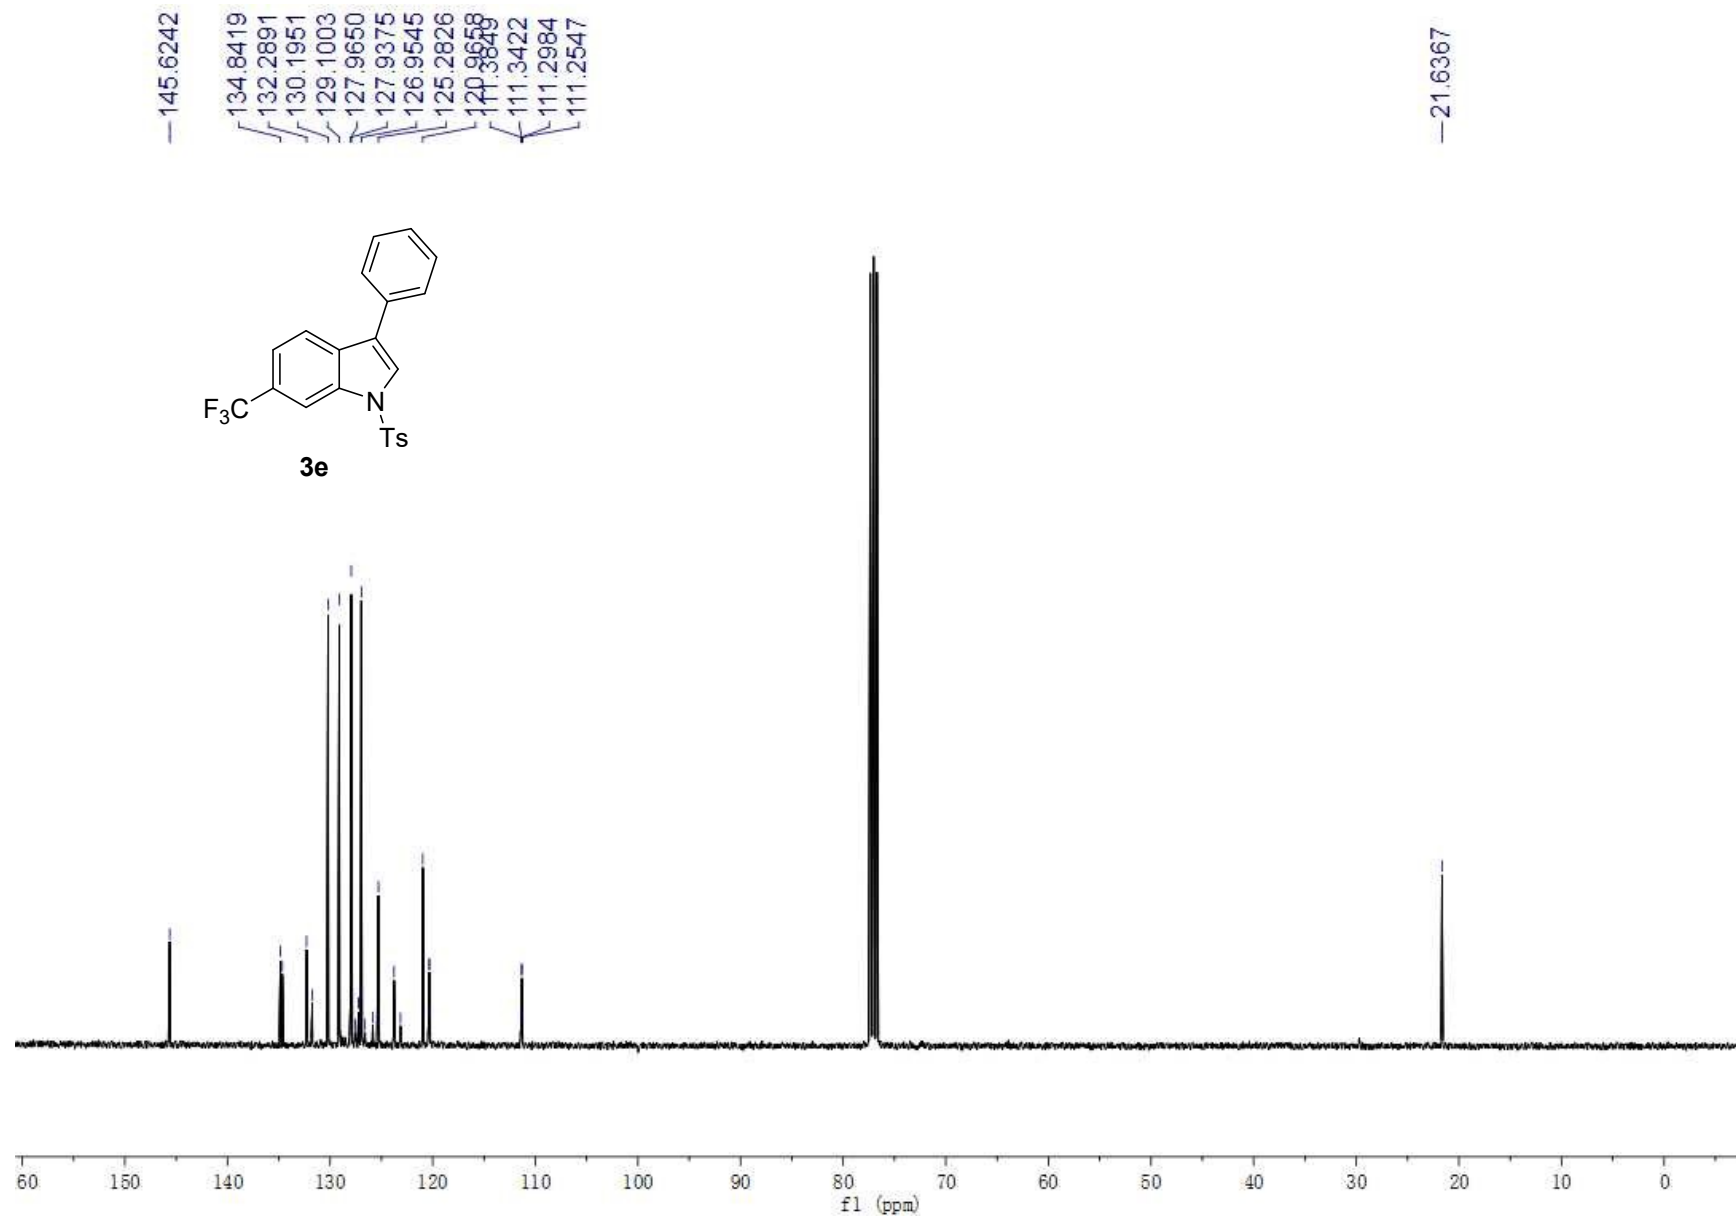

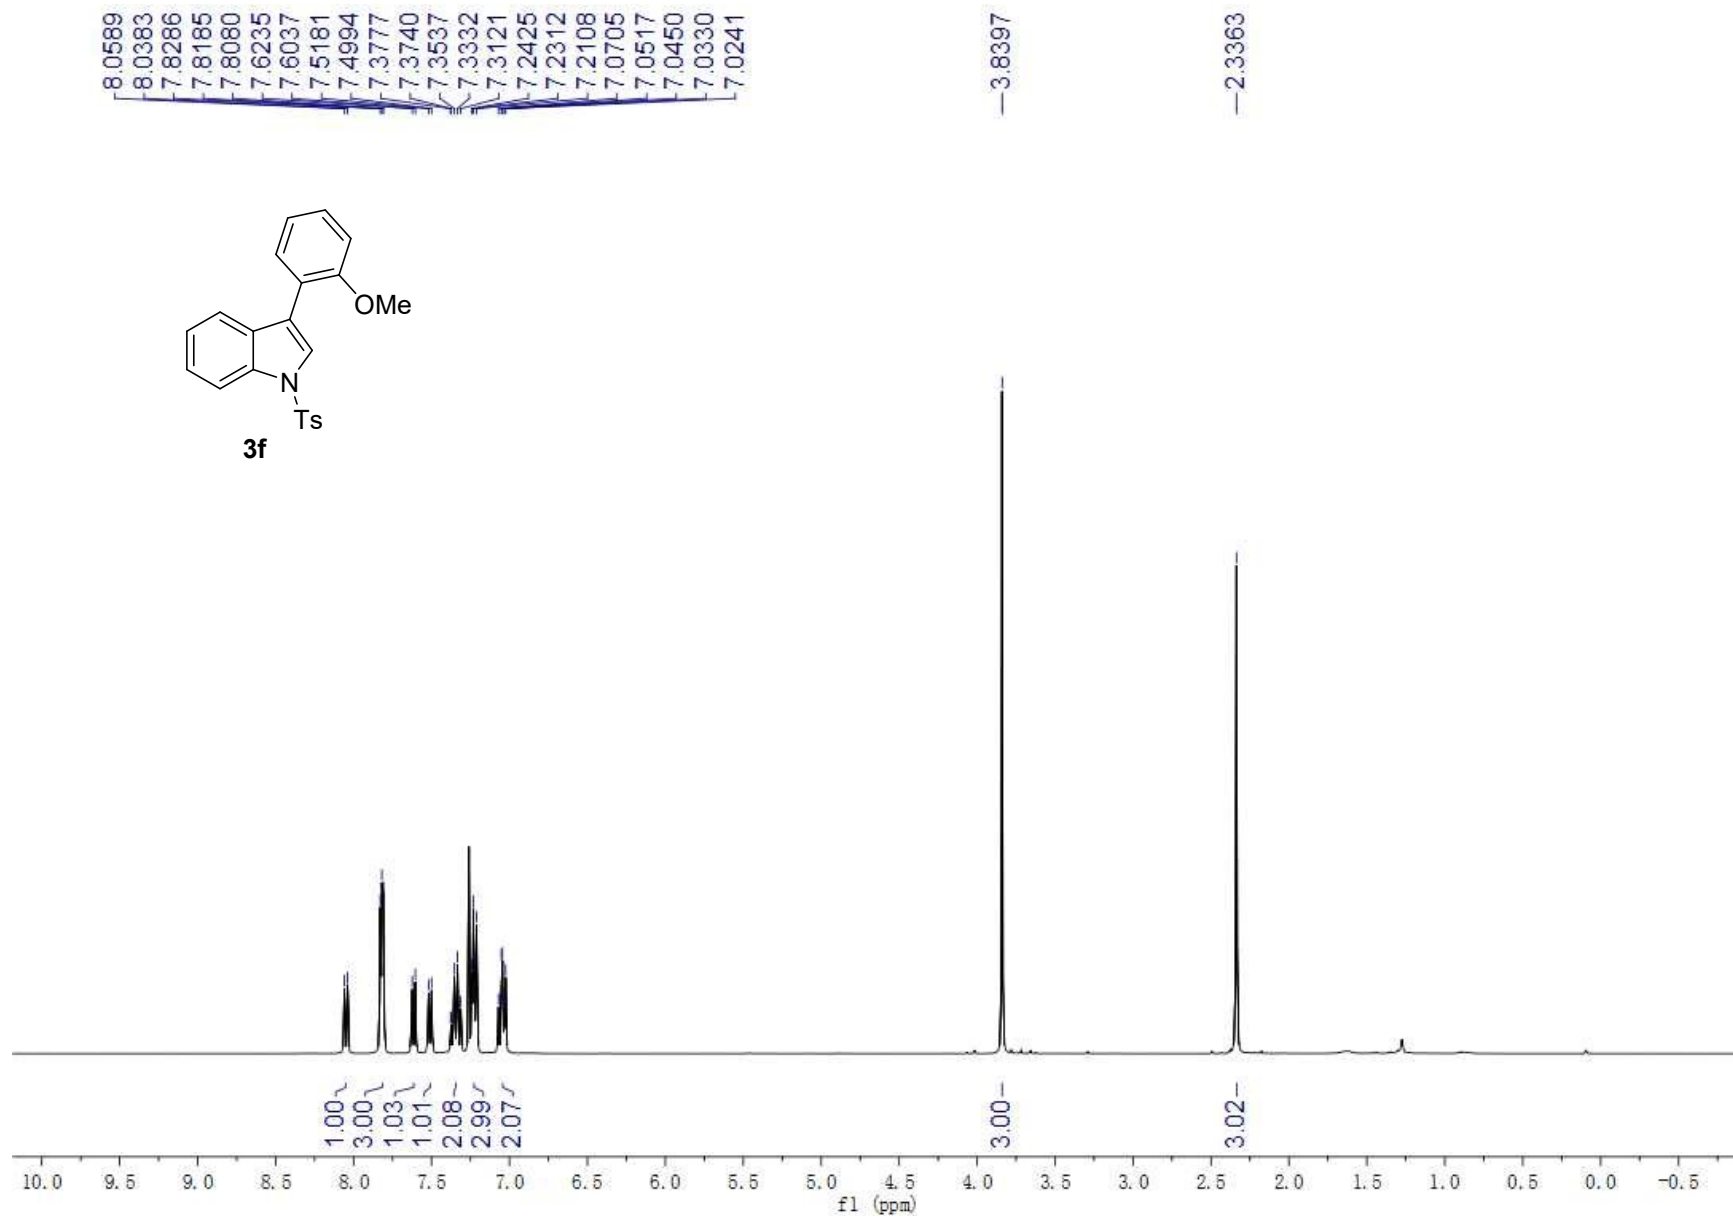

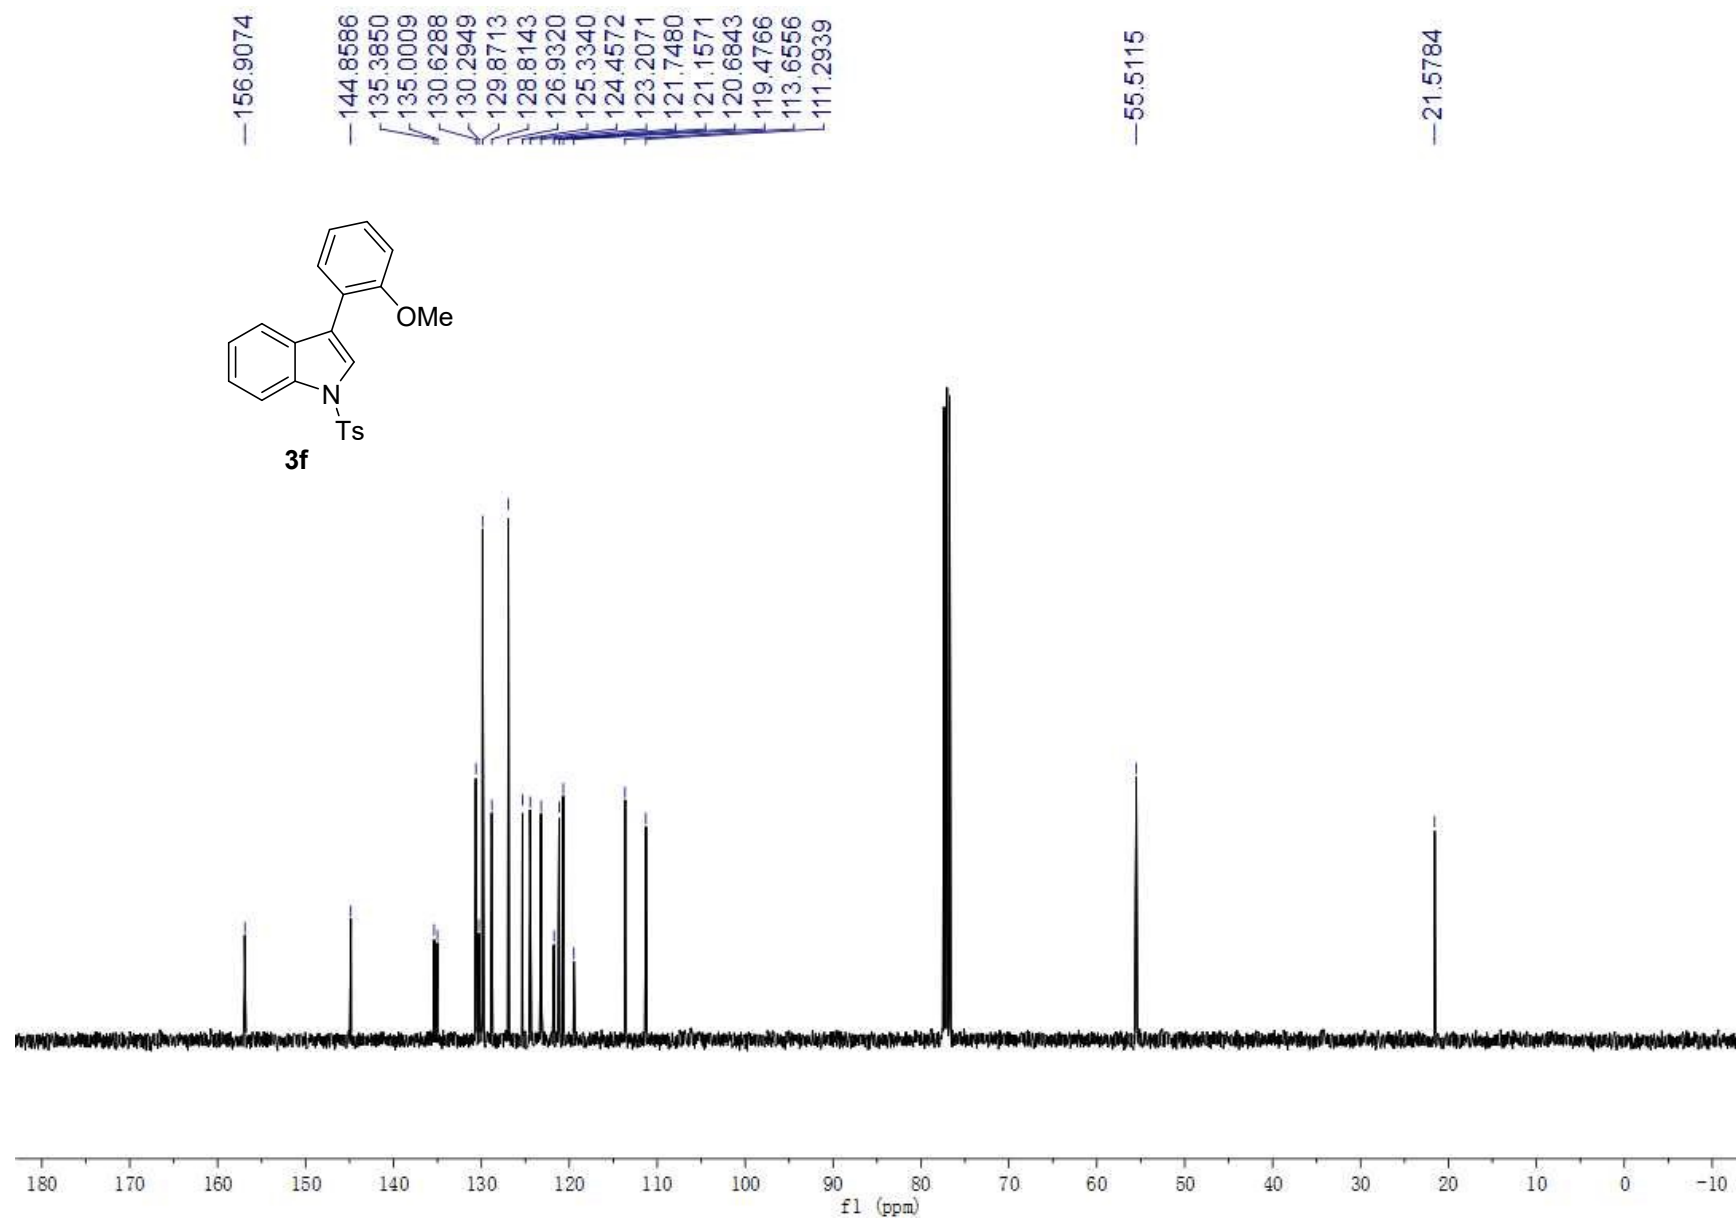



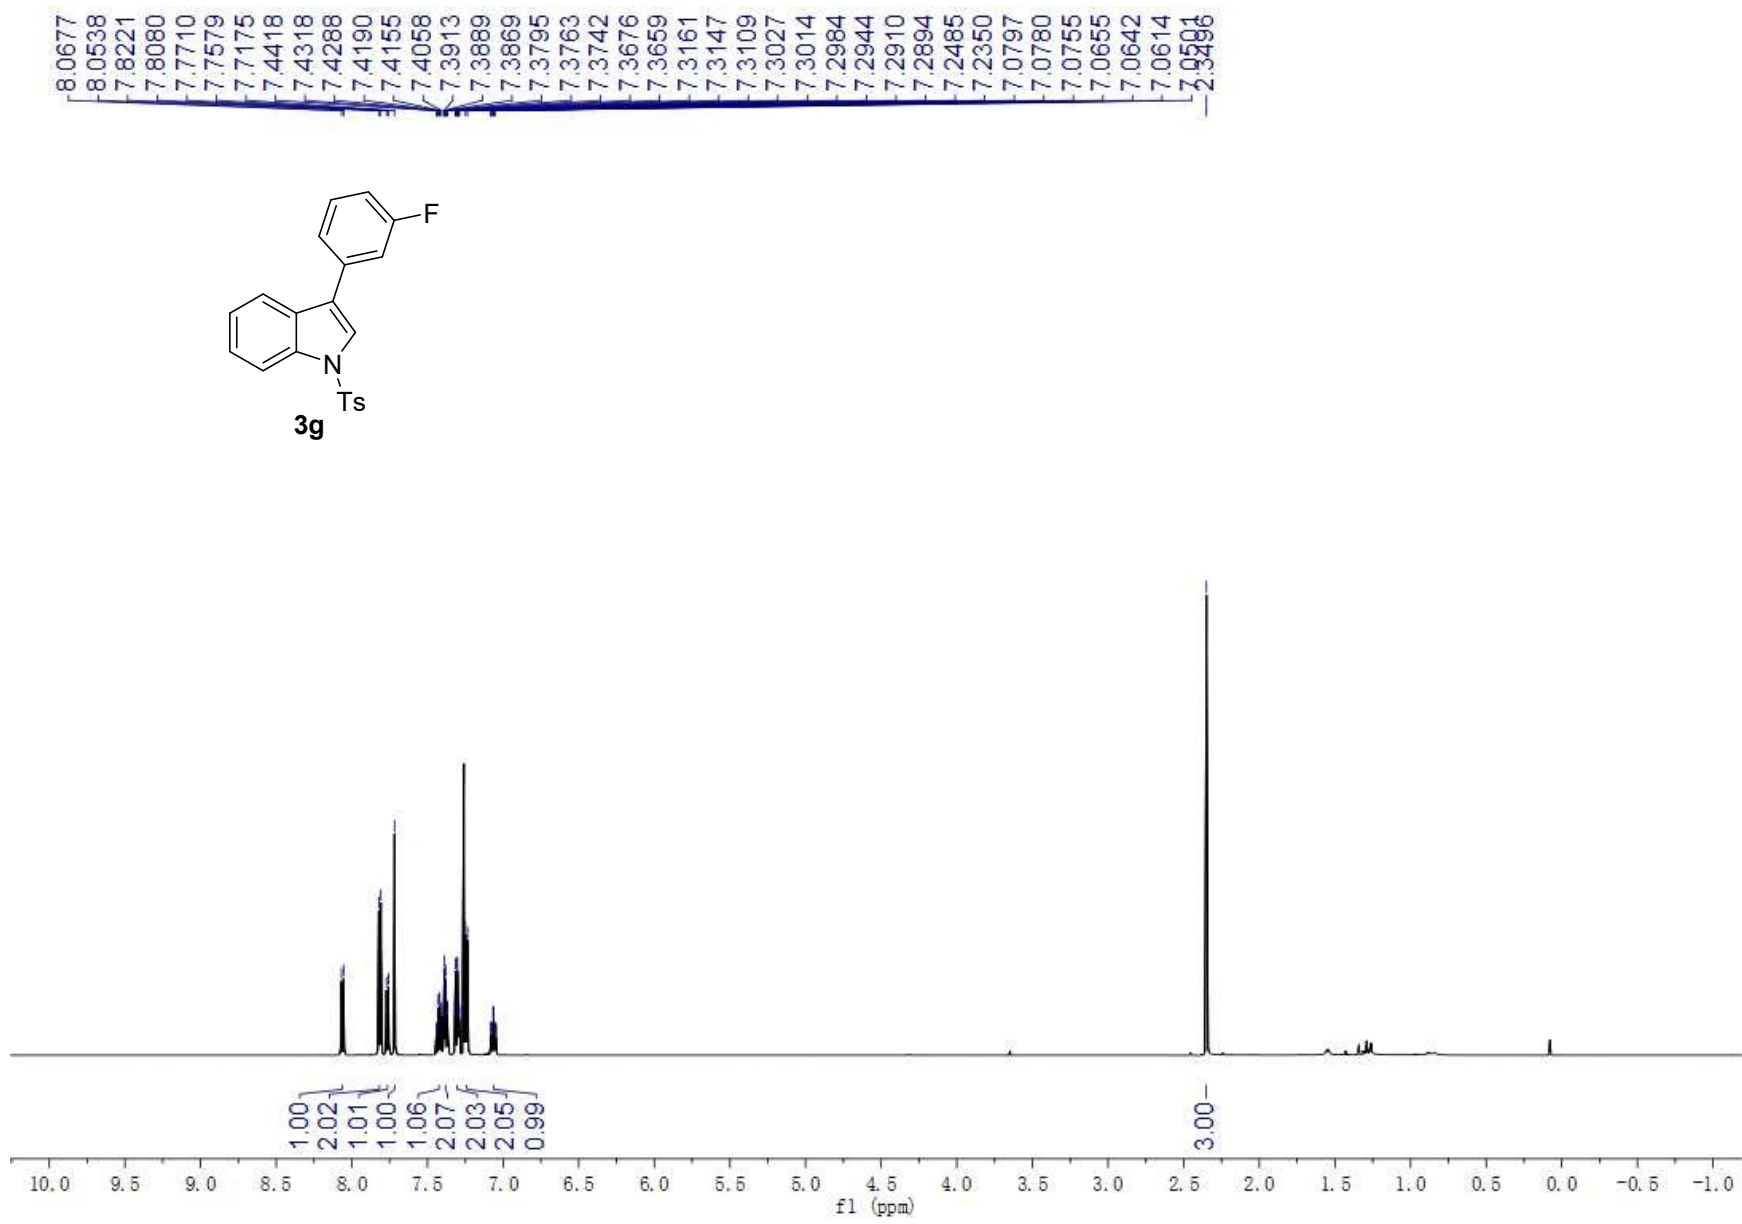

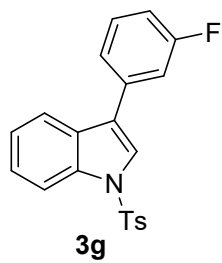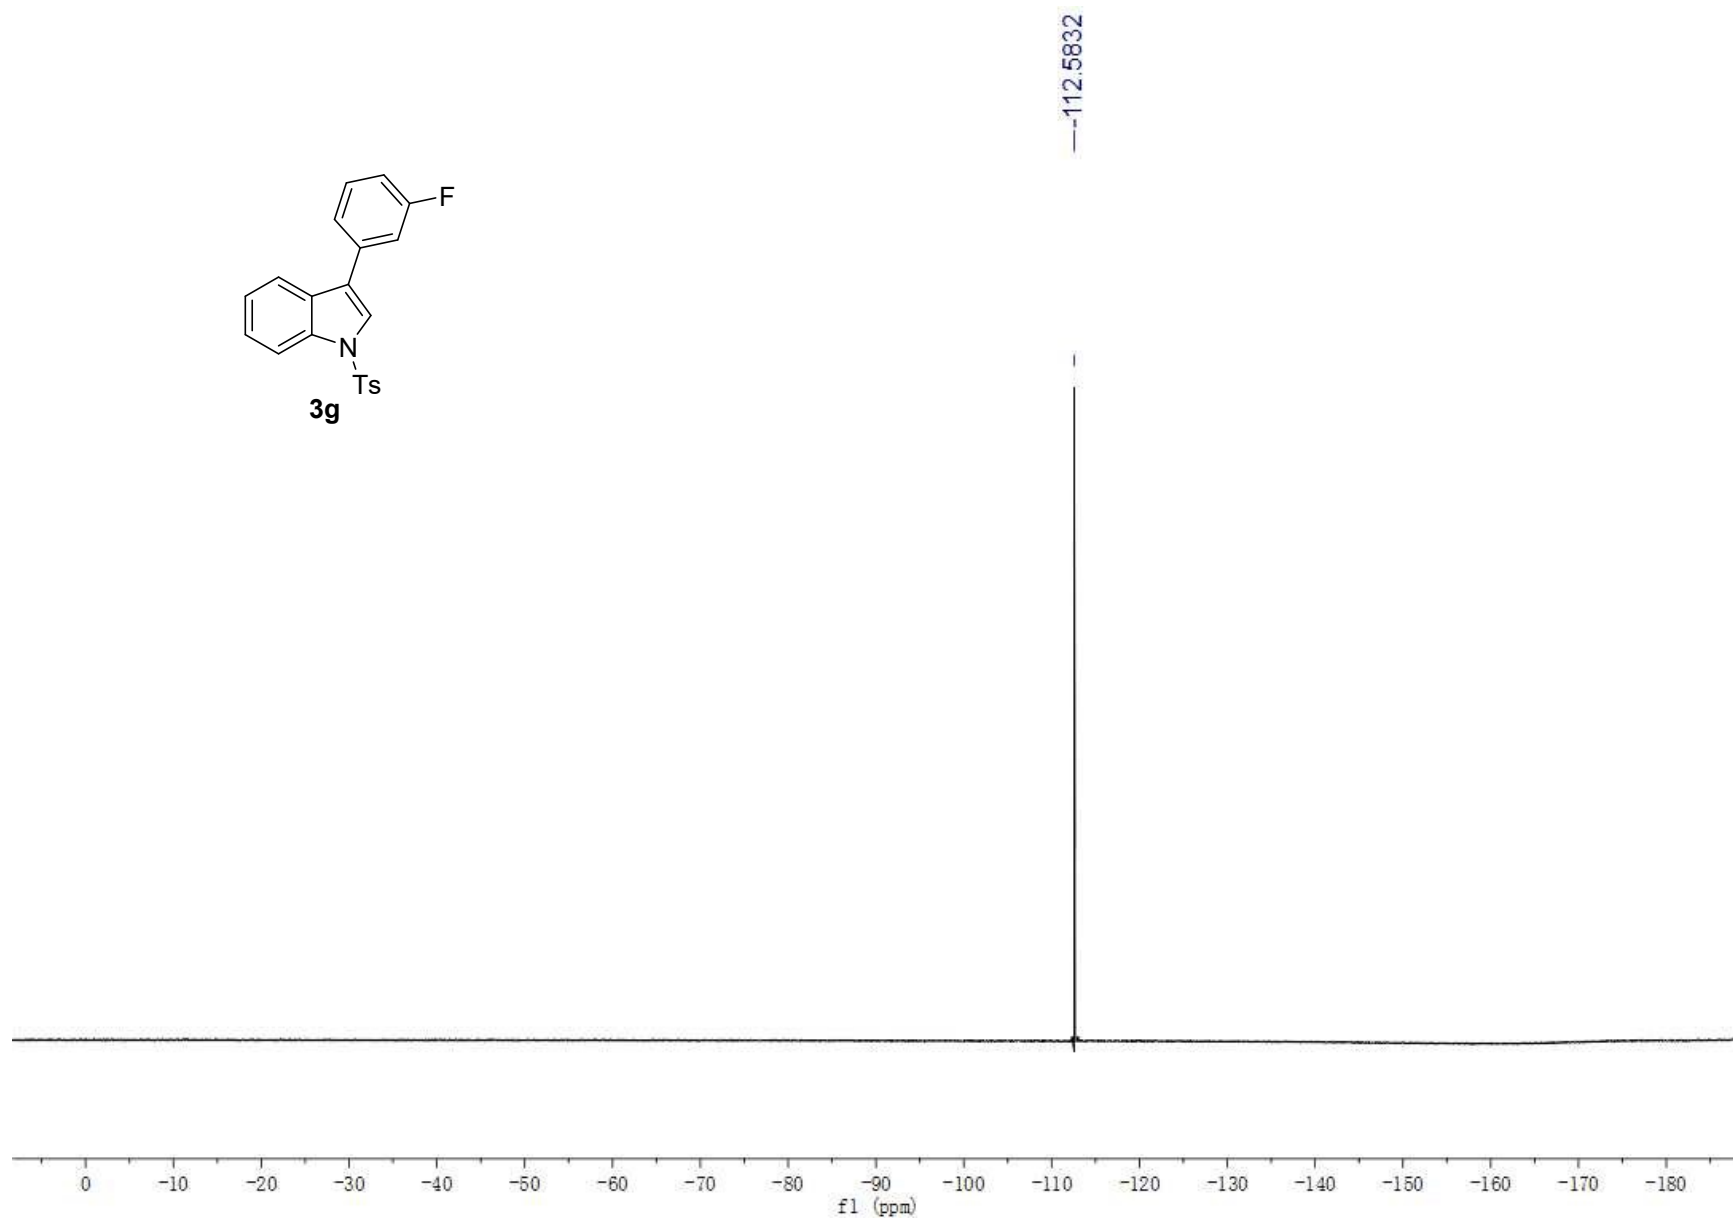

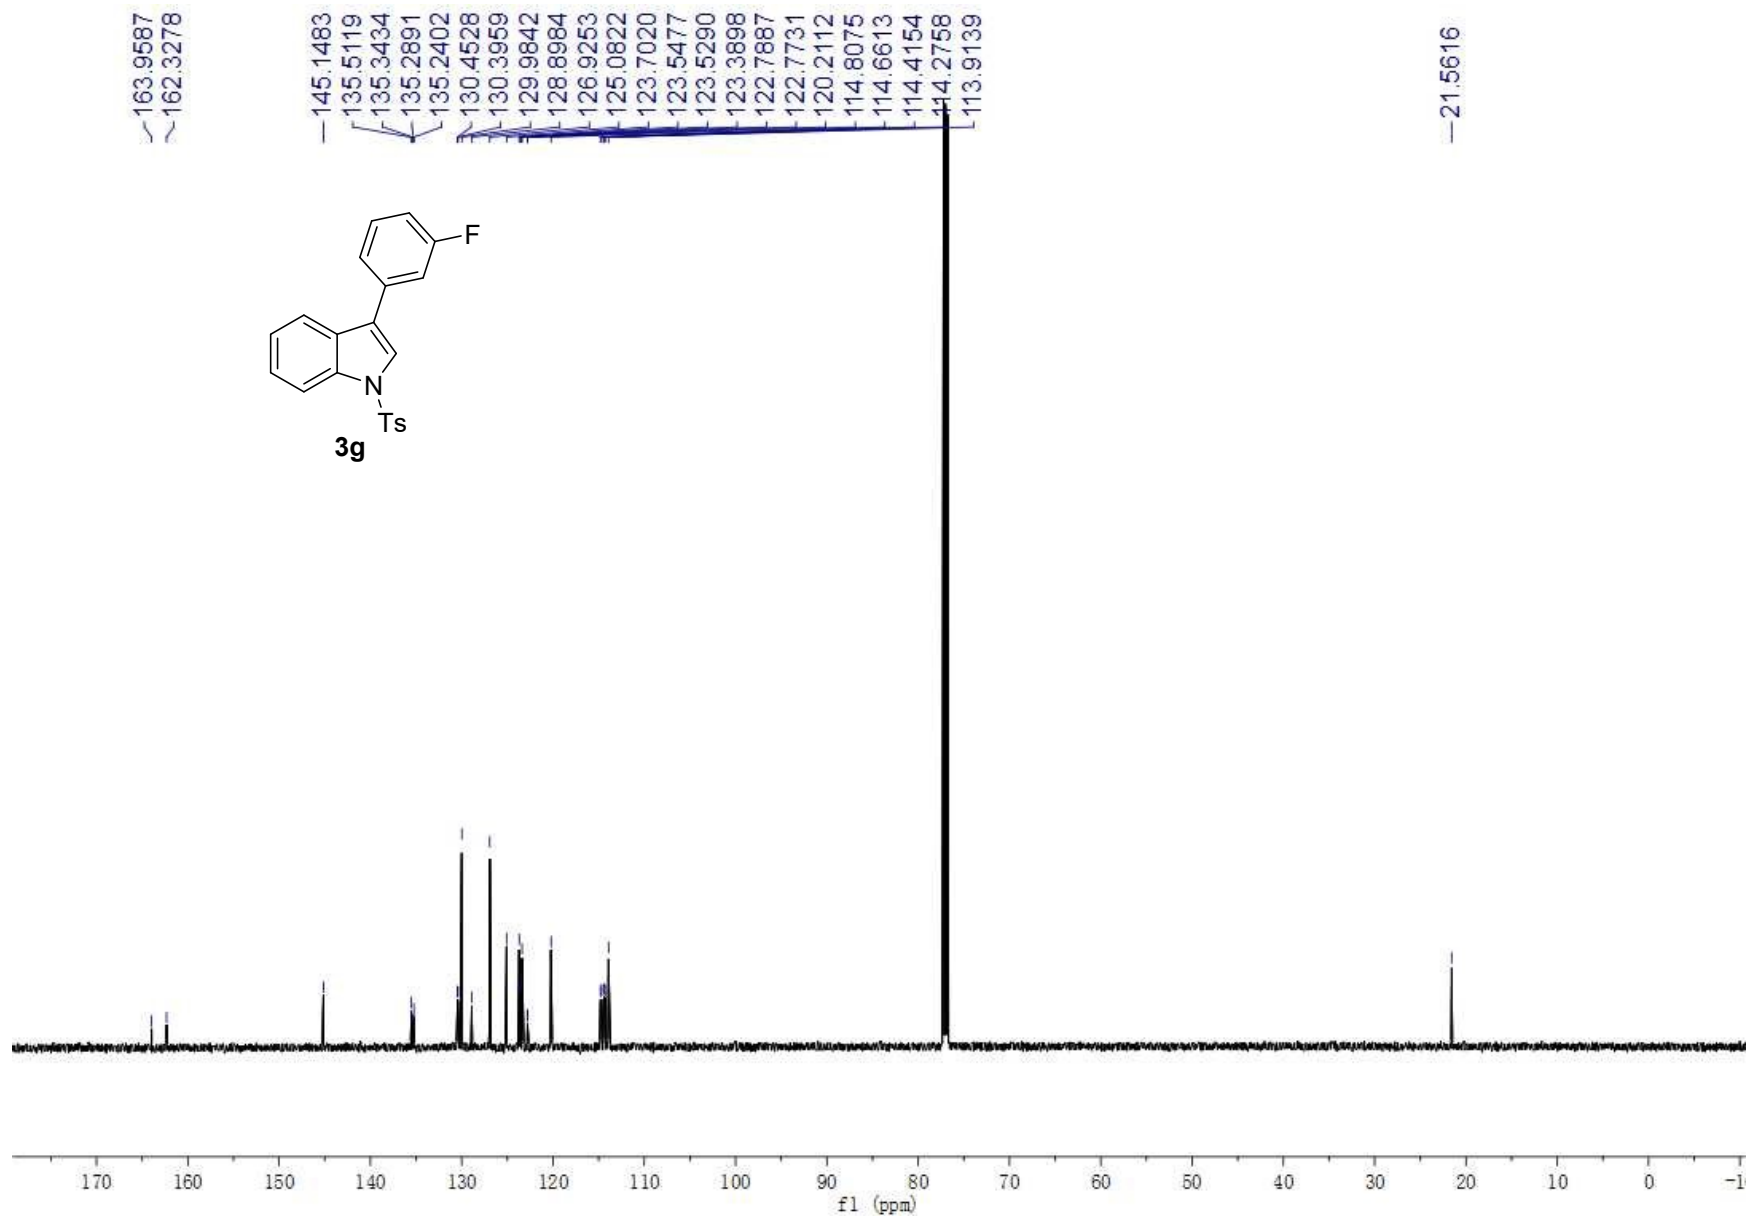

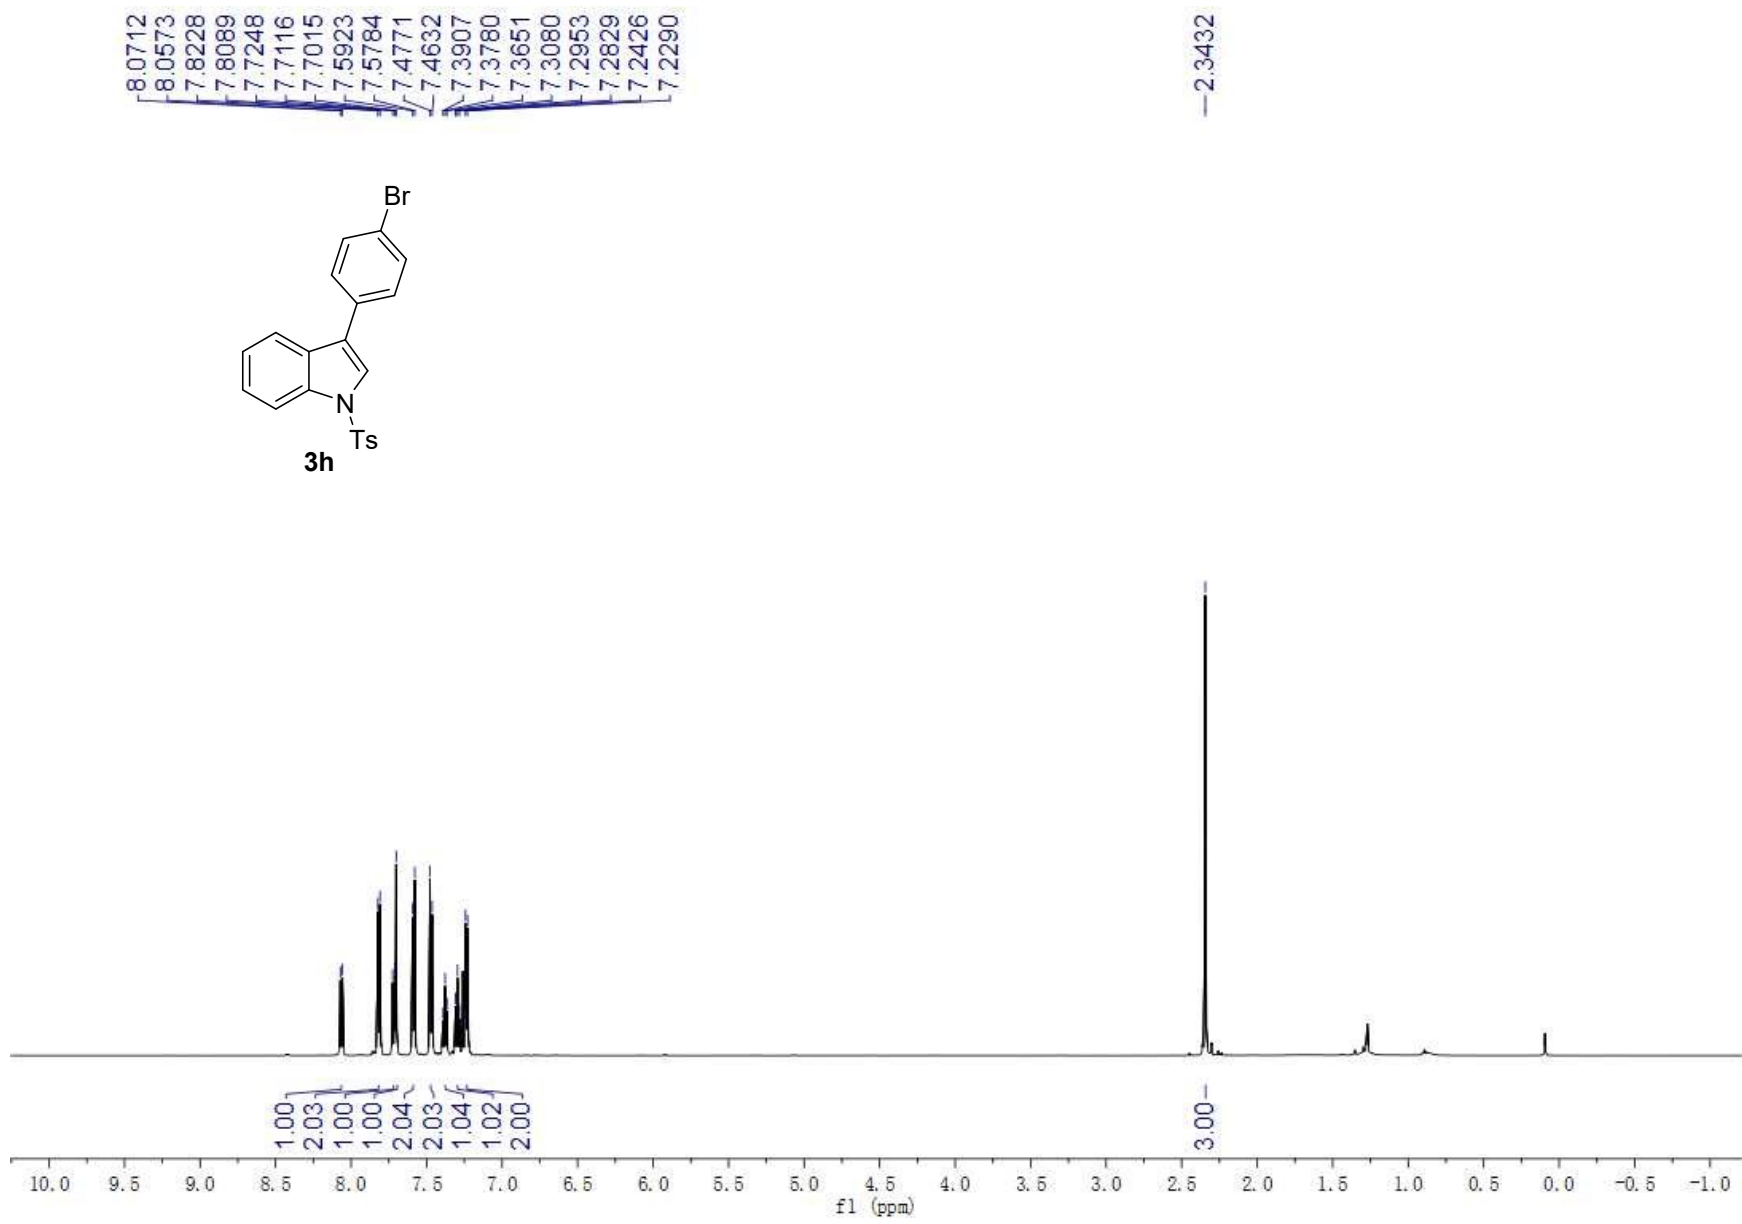

145.1451  
135.5248  
135.2496  
132.0671  
129.9879  
129.4300  
128.9354  
126.9268  
125.0772  
123.6899  
123.1013  
122.7701  
121.4860  
120.1748  
113.9276

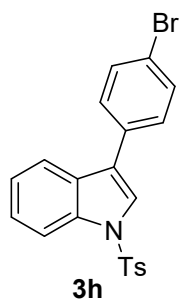

21.5684

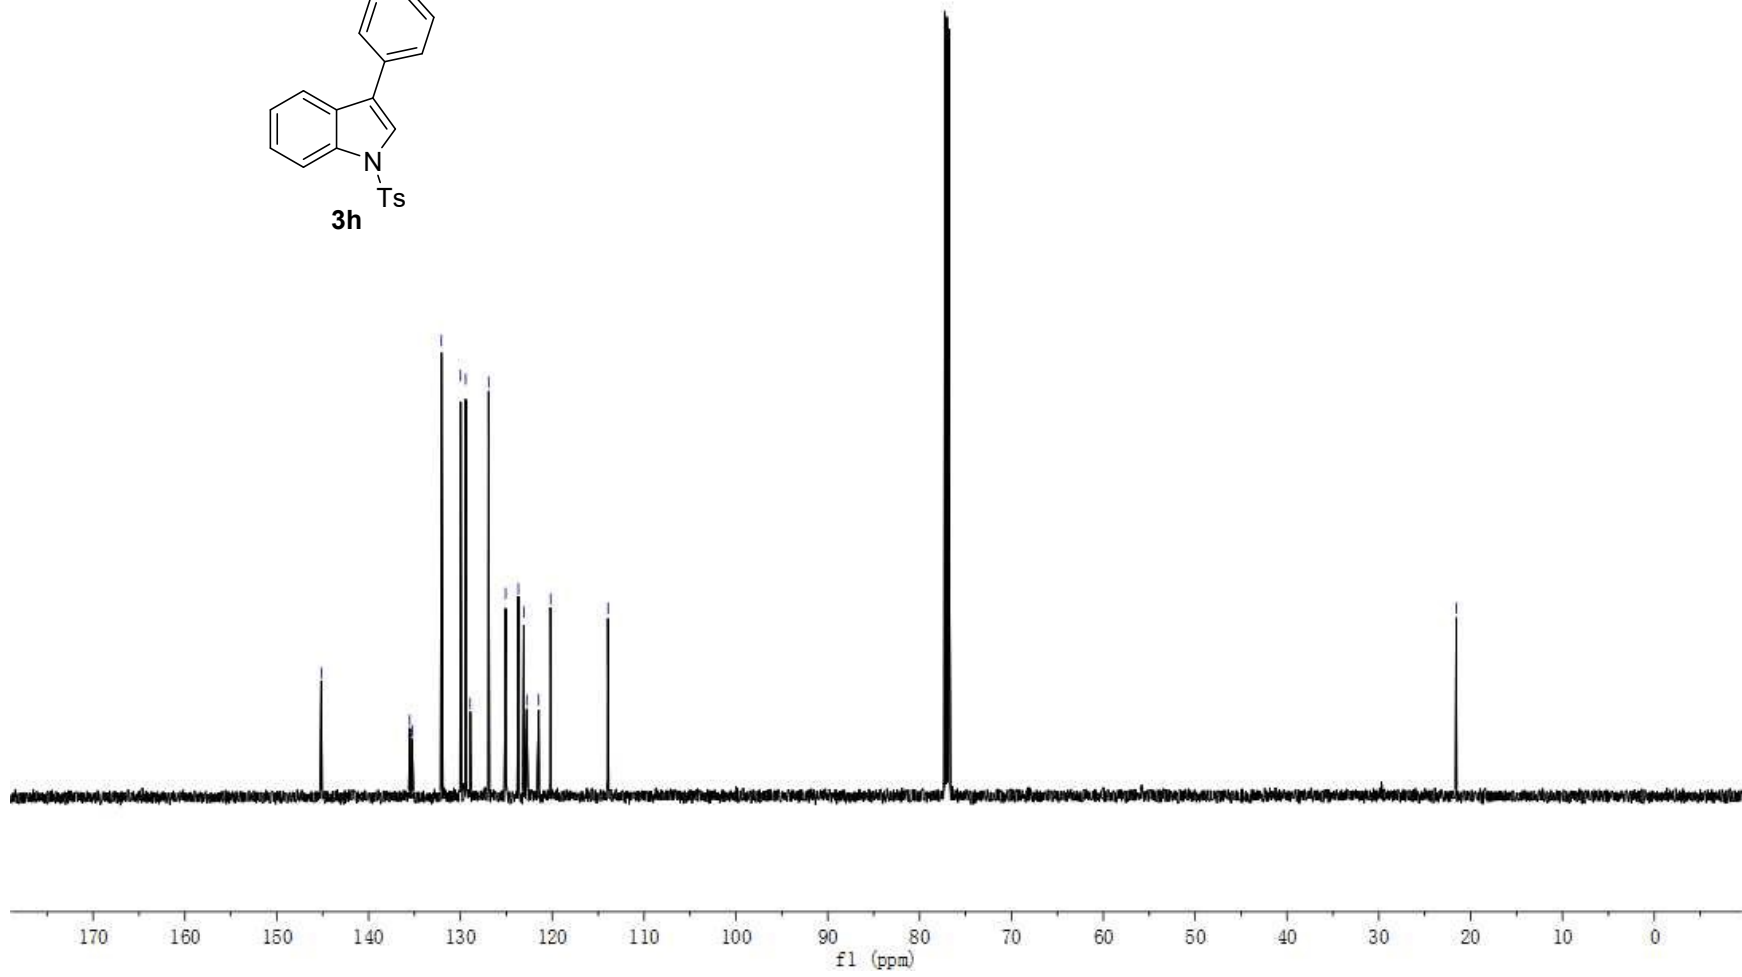

8.0015  
7.9793  
7.7562  
7.7354  
7.4596  
7.4407  
7.3346  
7.3138  
7.2964  
7.2603  
7.2393  
7.2212  
7.2011  
7.1804

2.3204  
2.2448

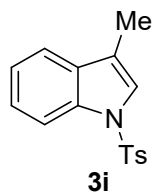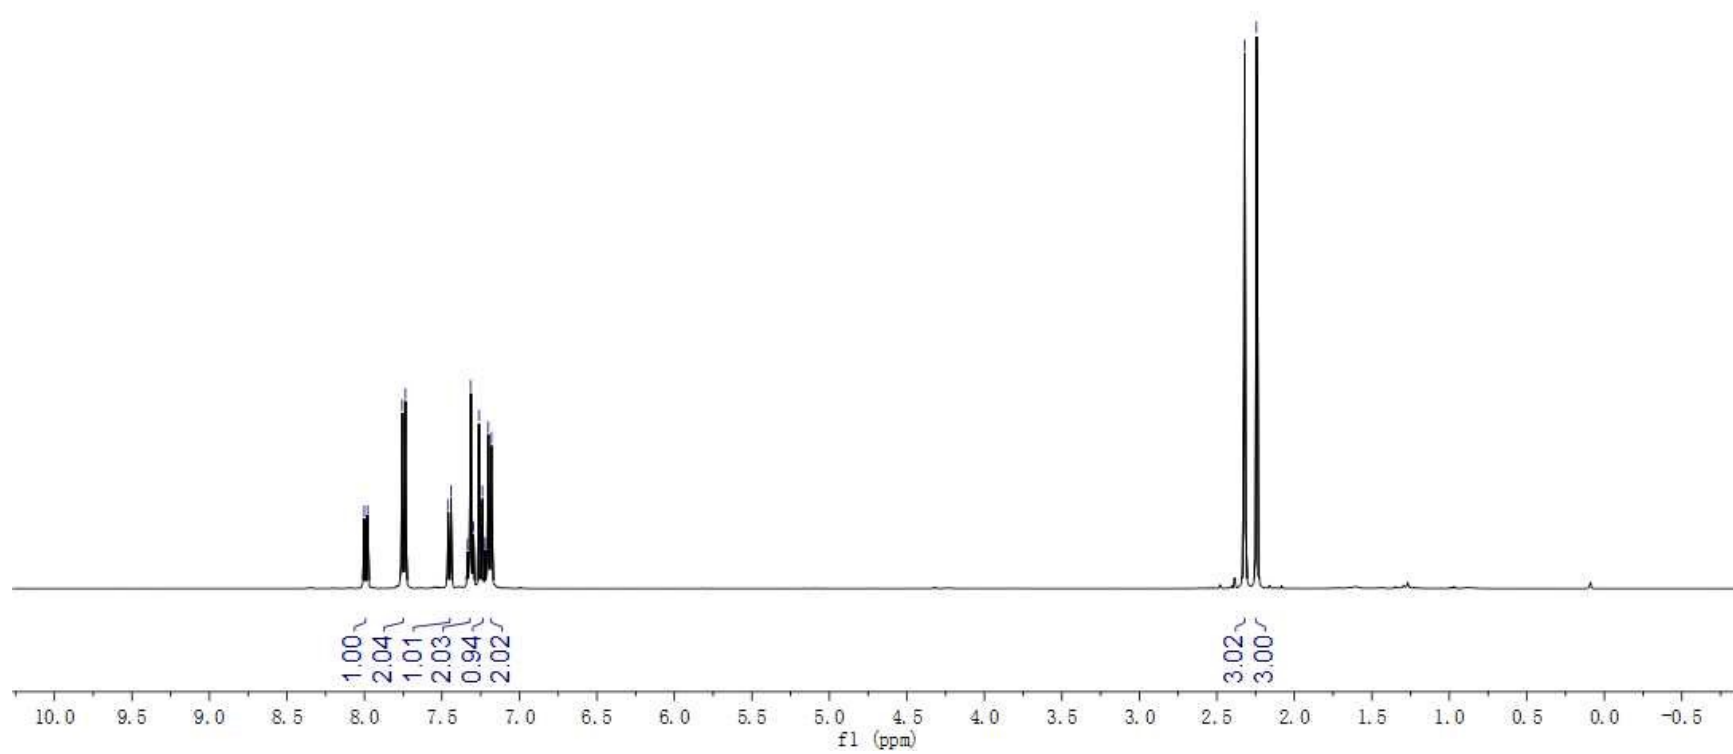

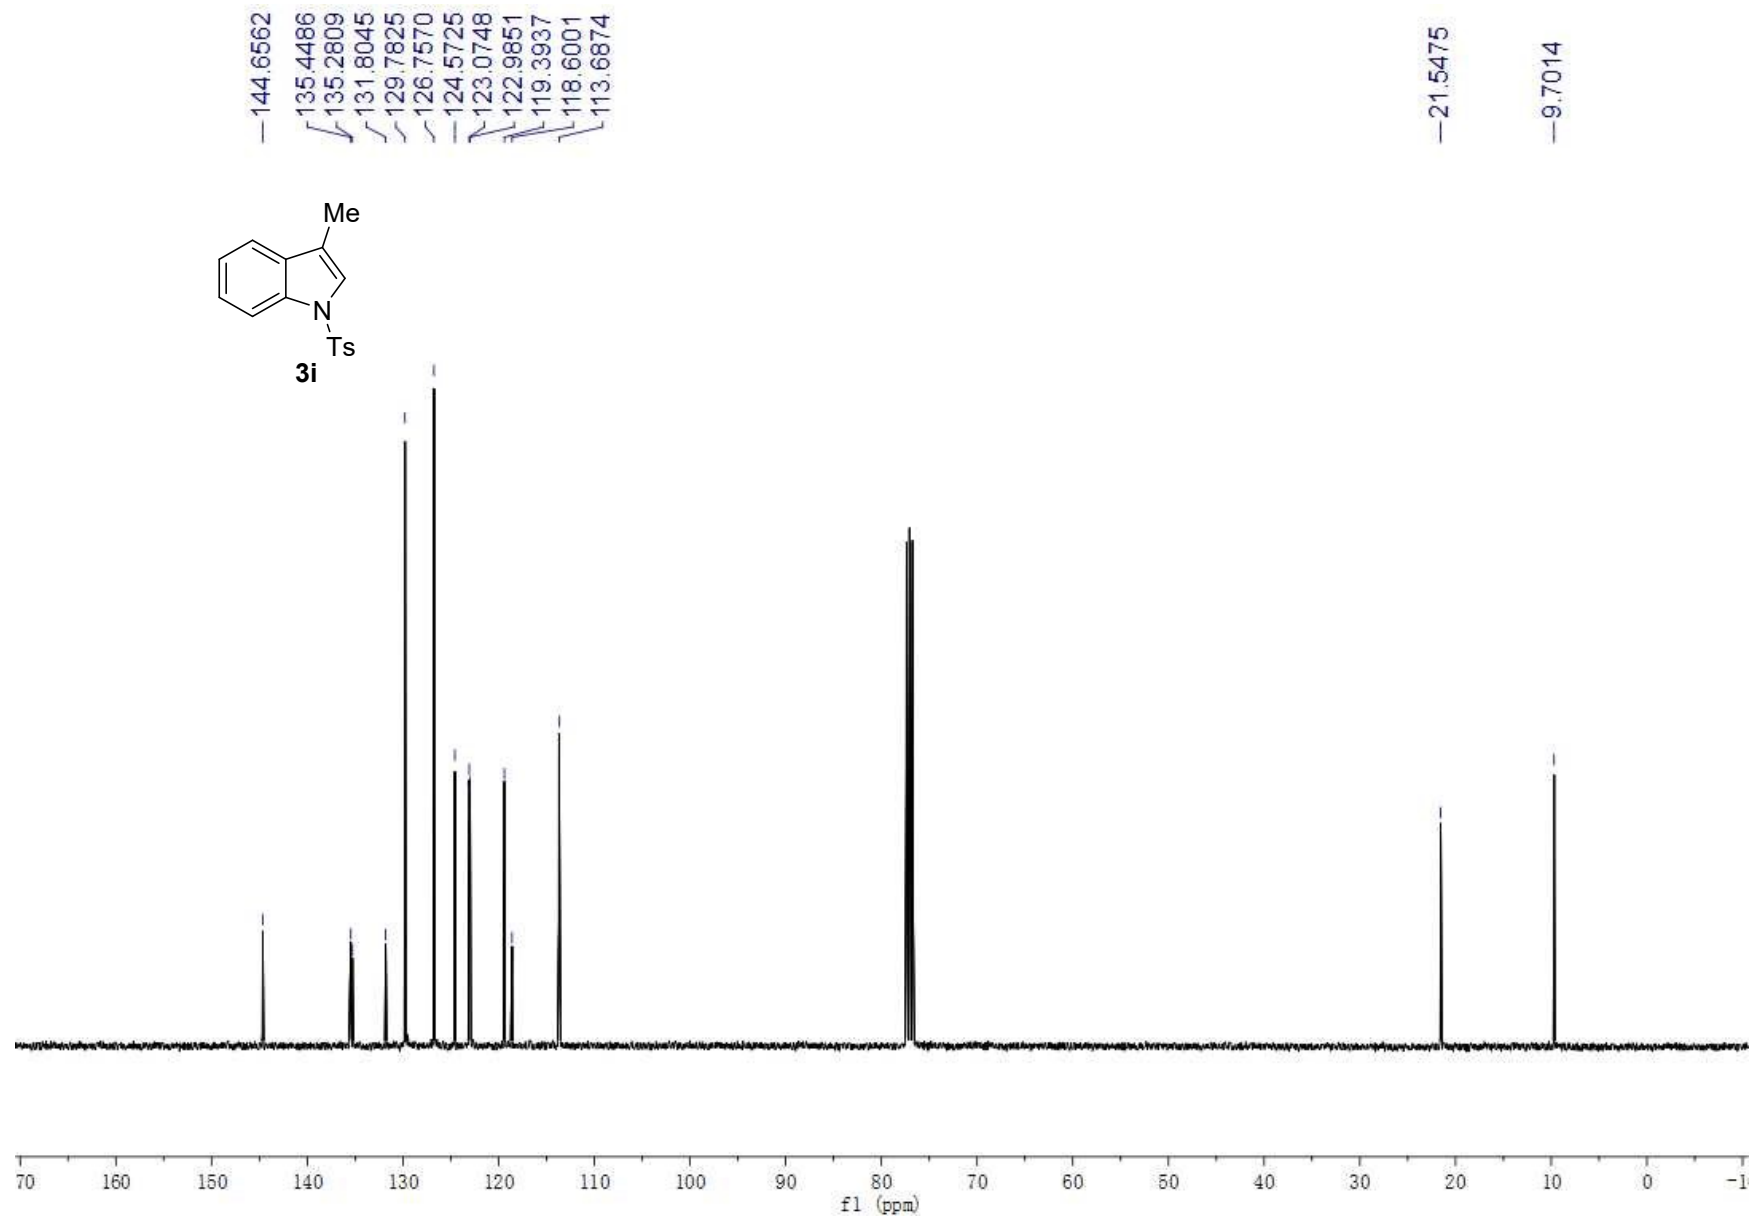

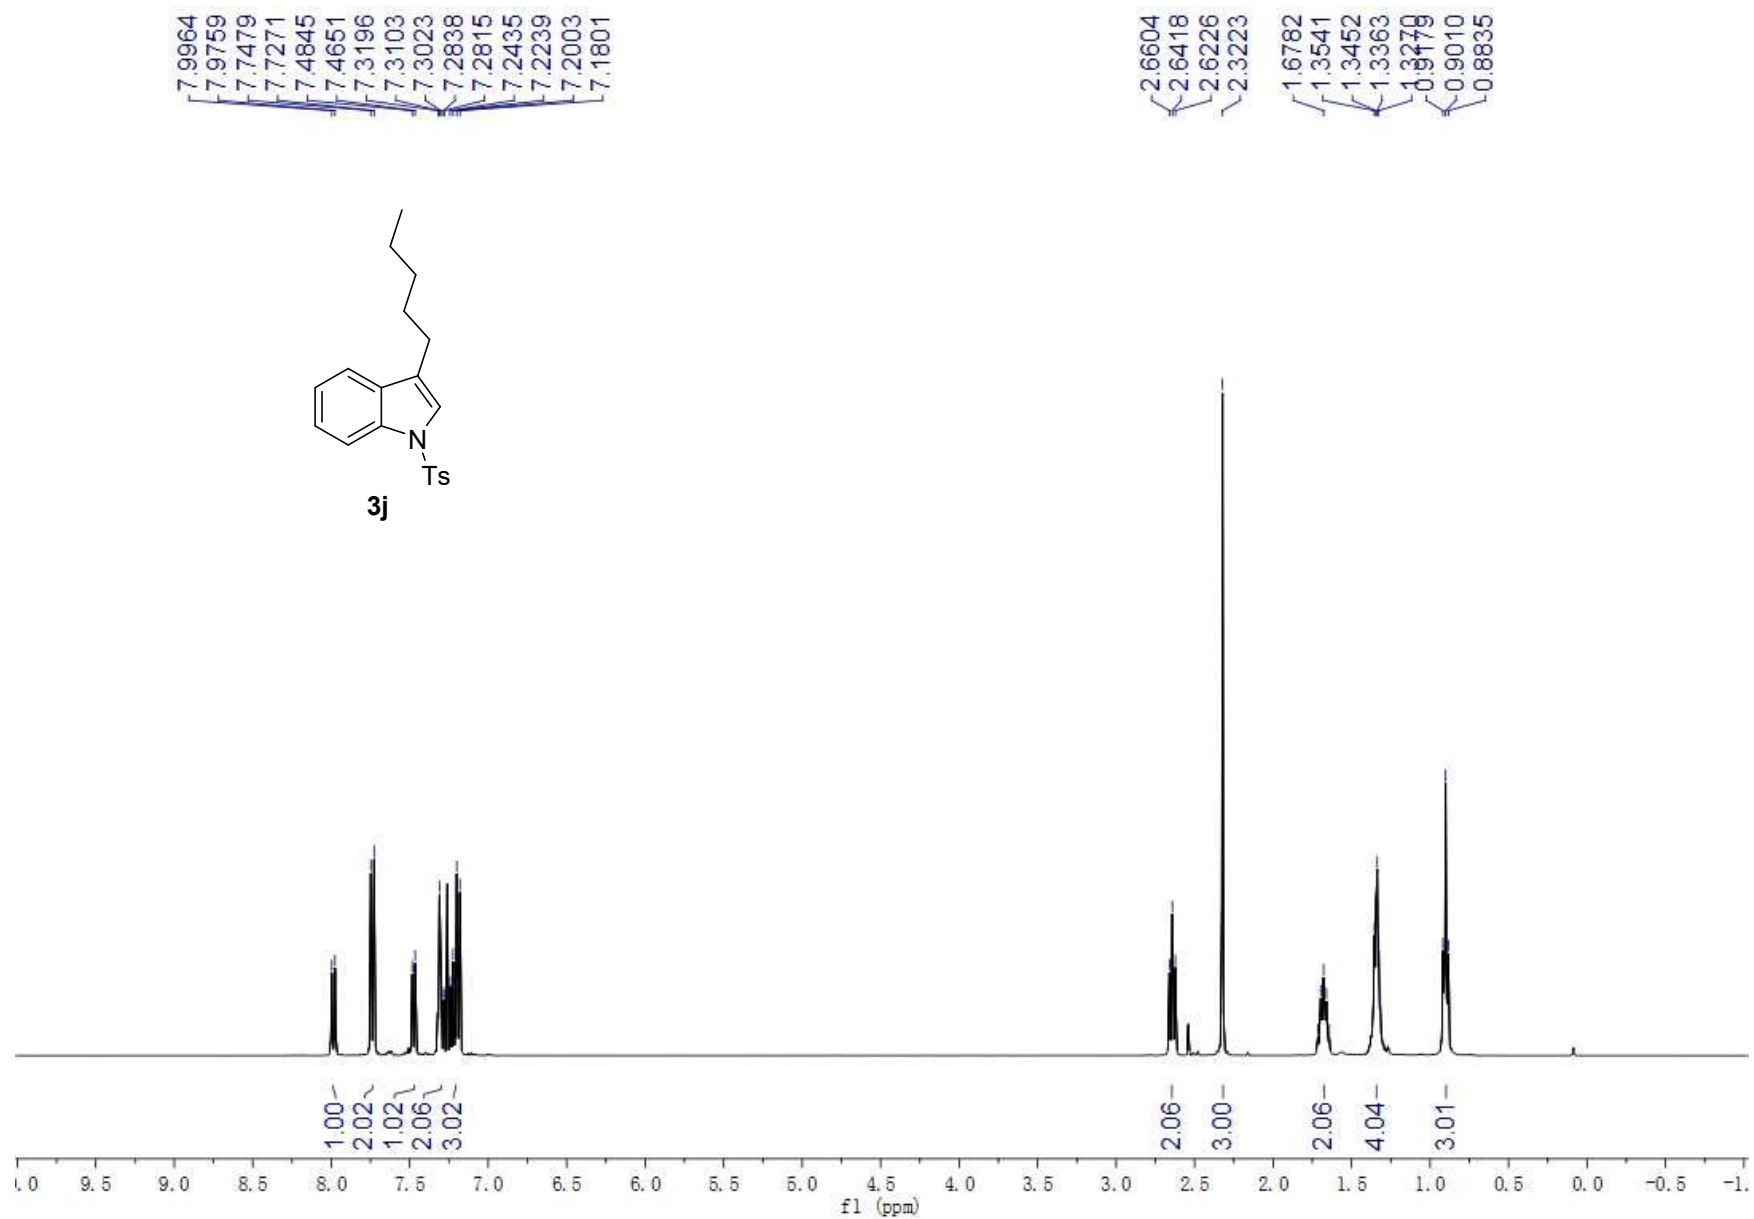



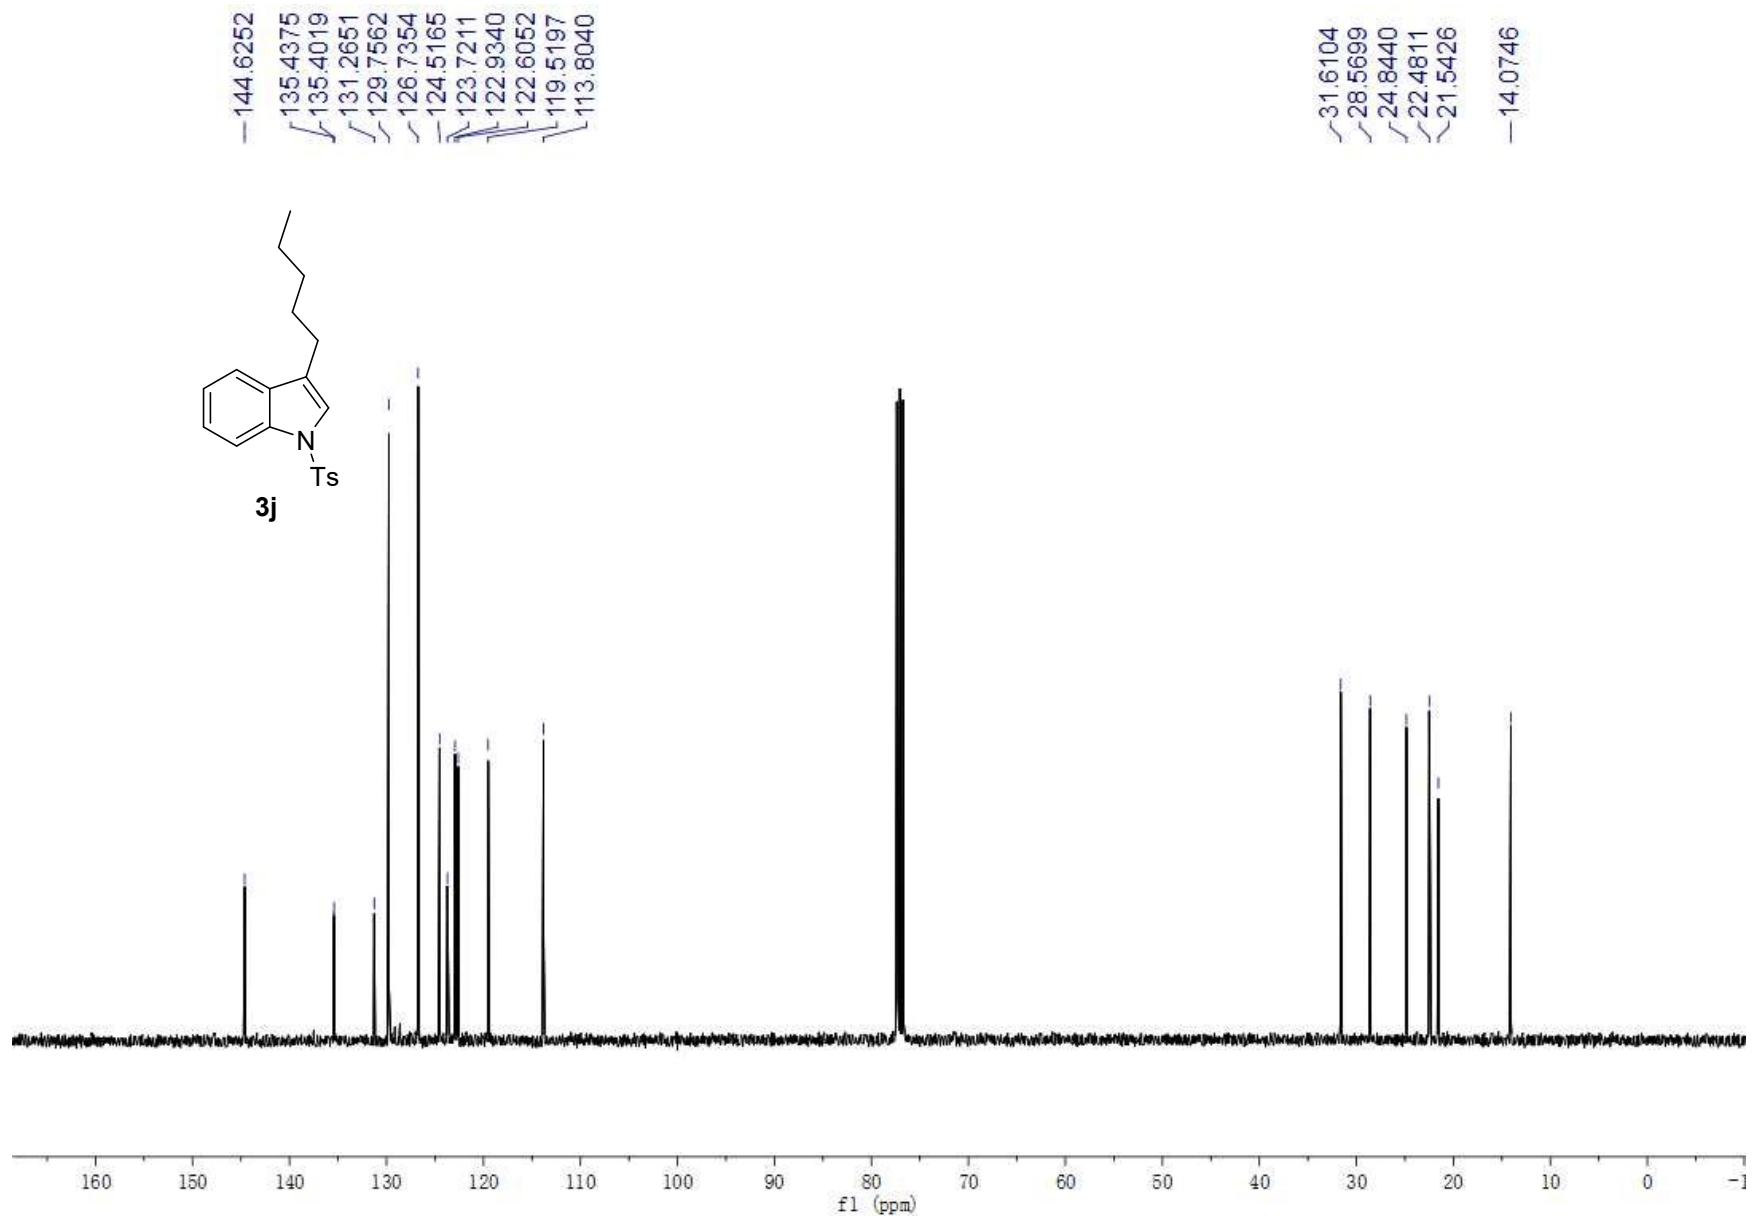

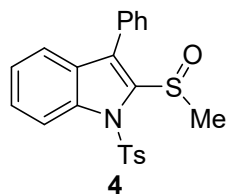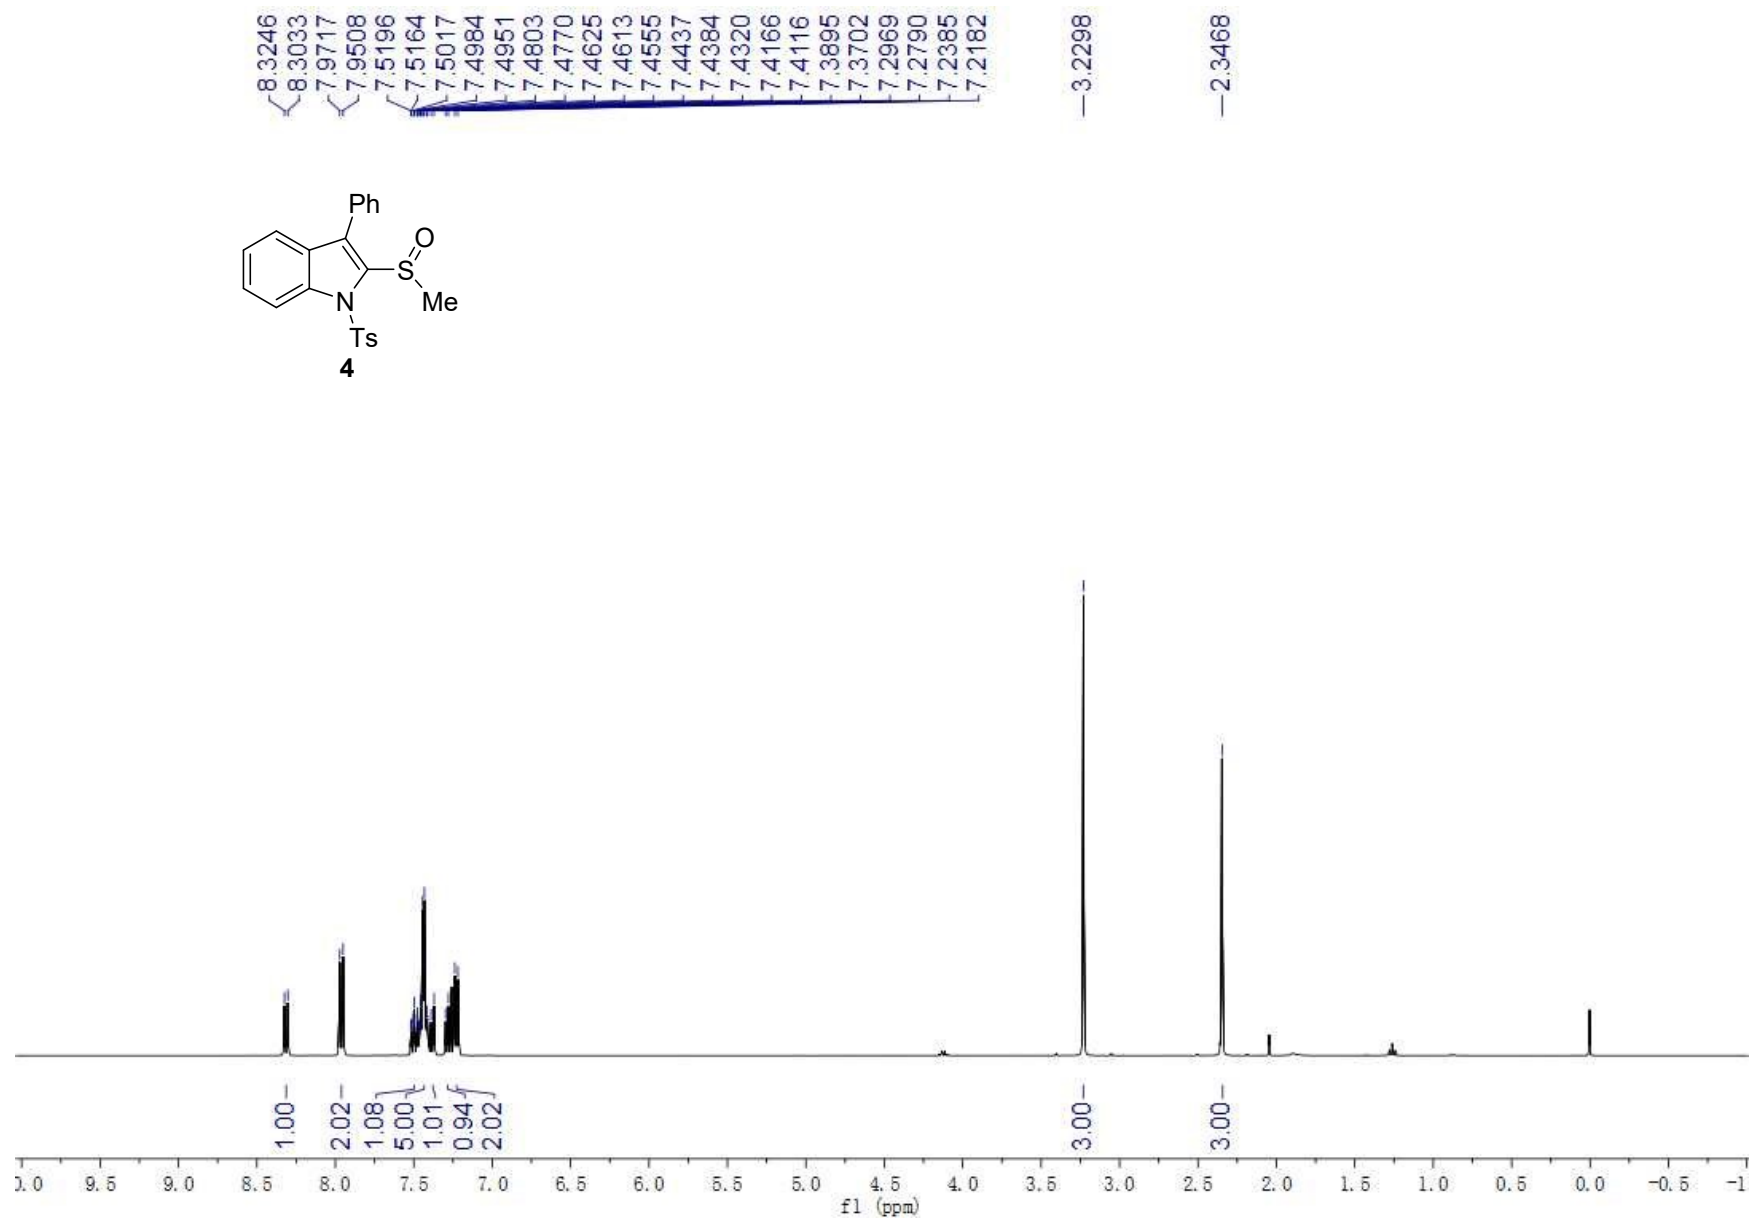

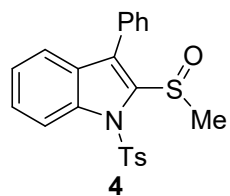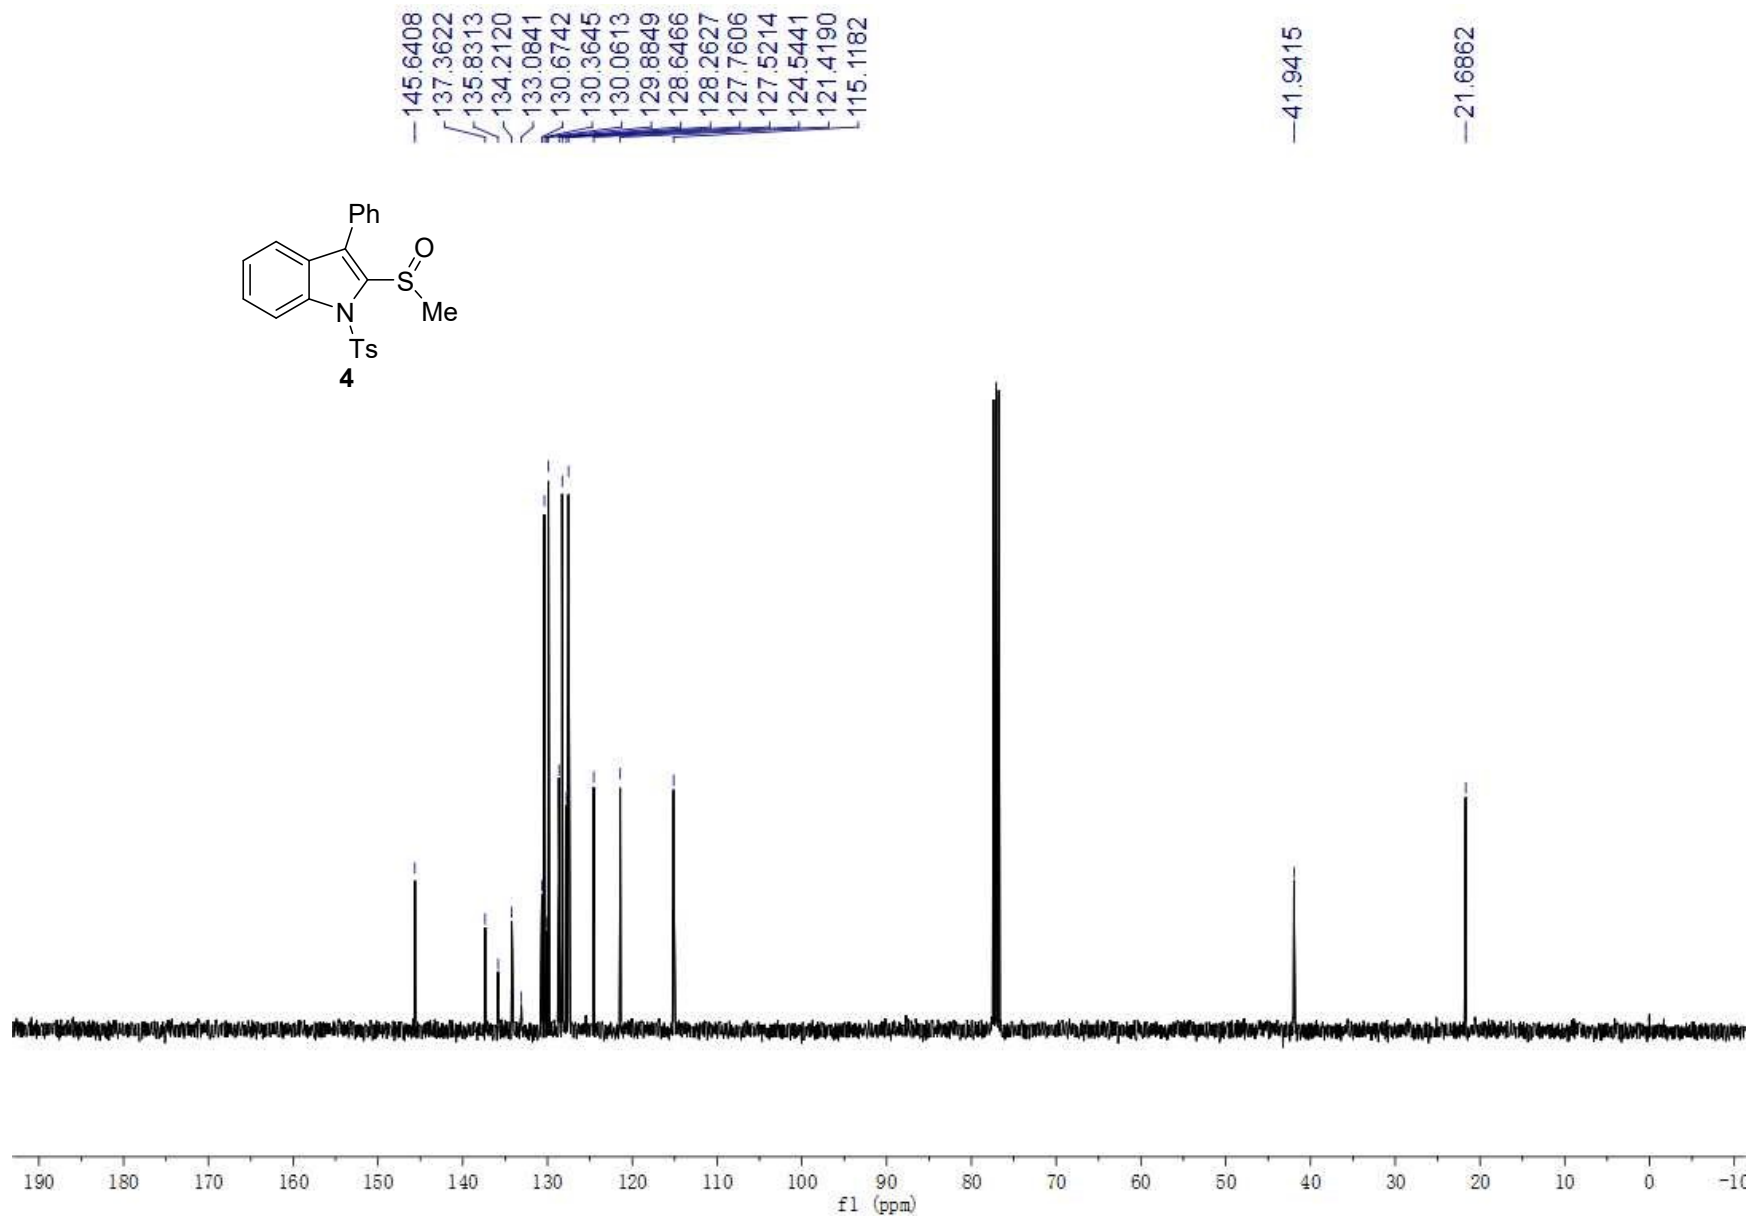

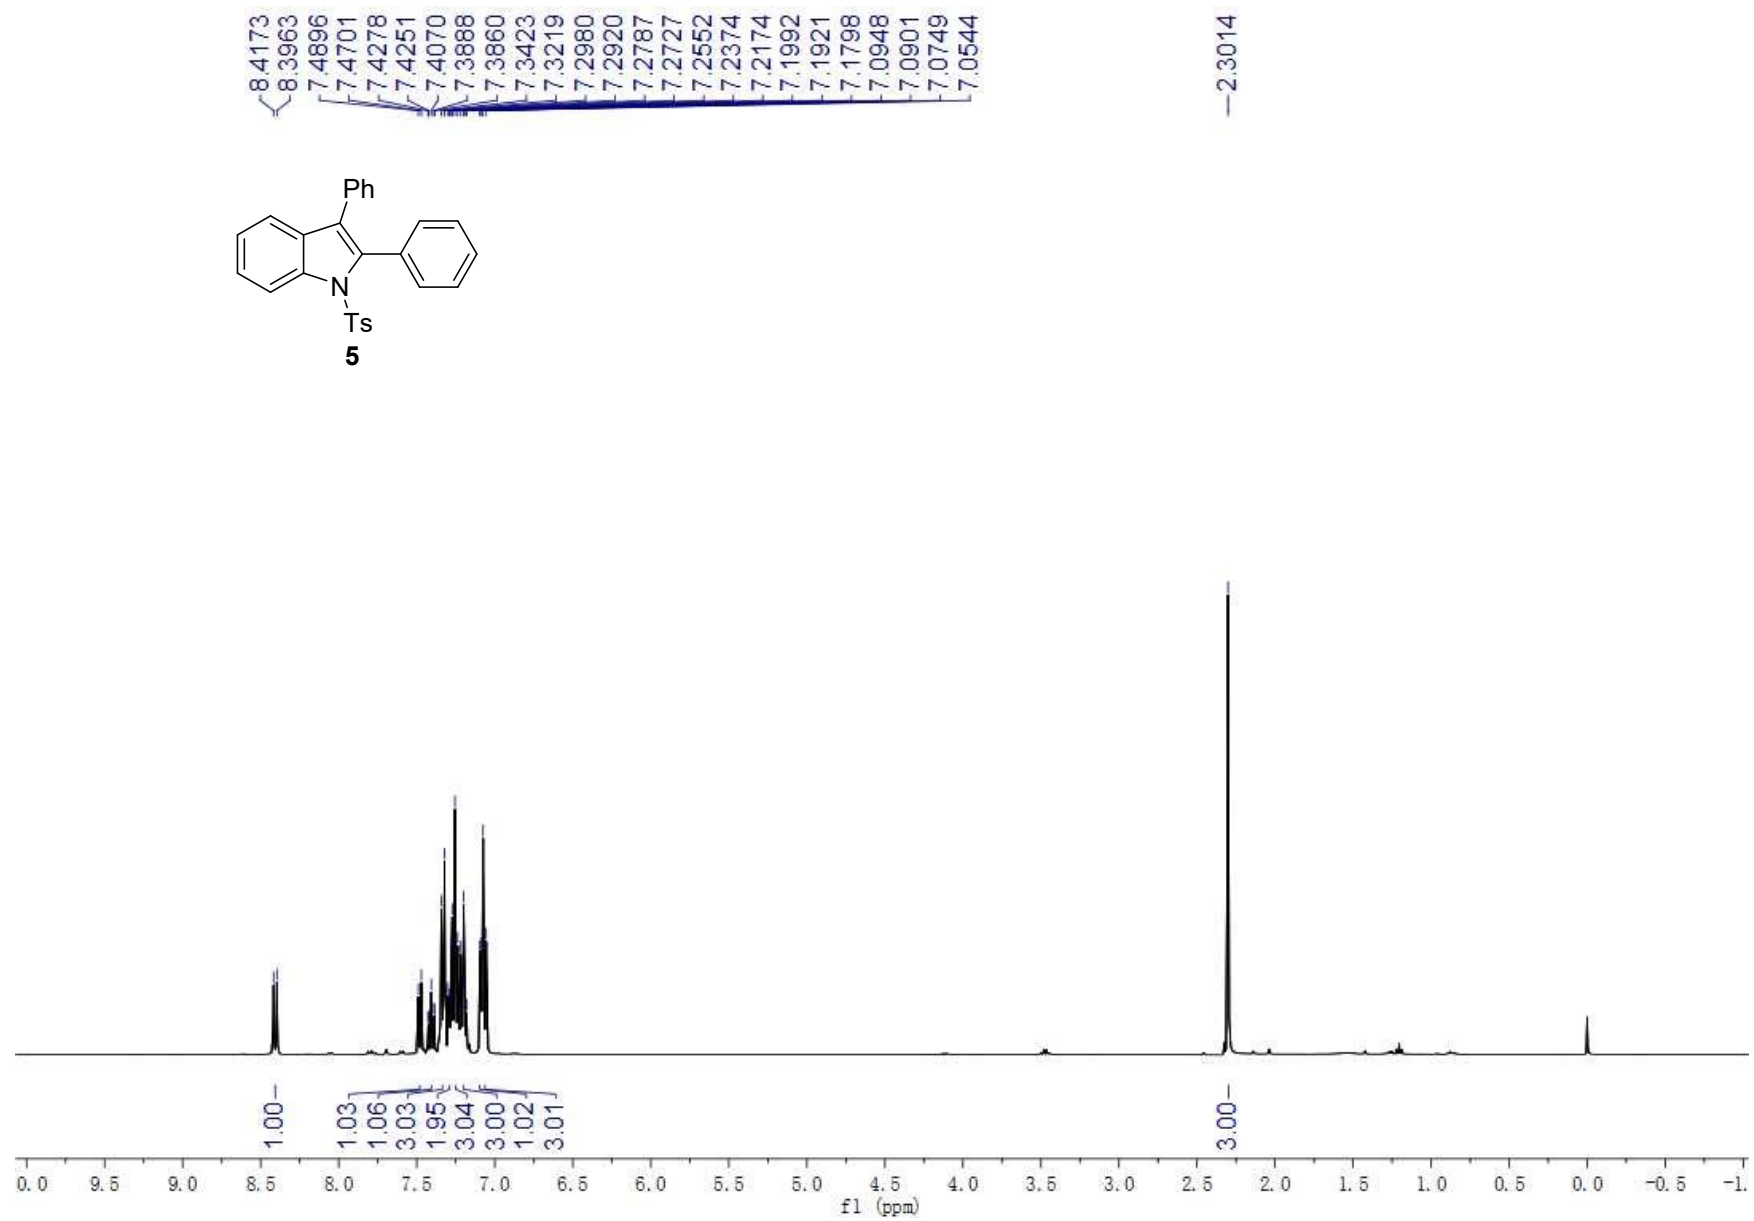

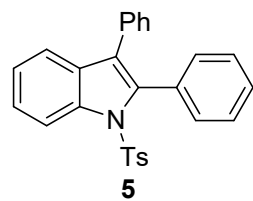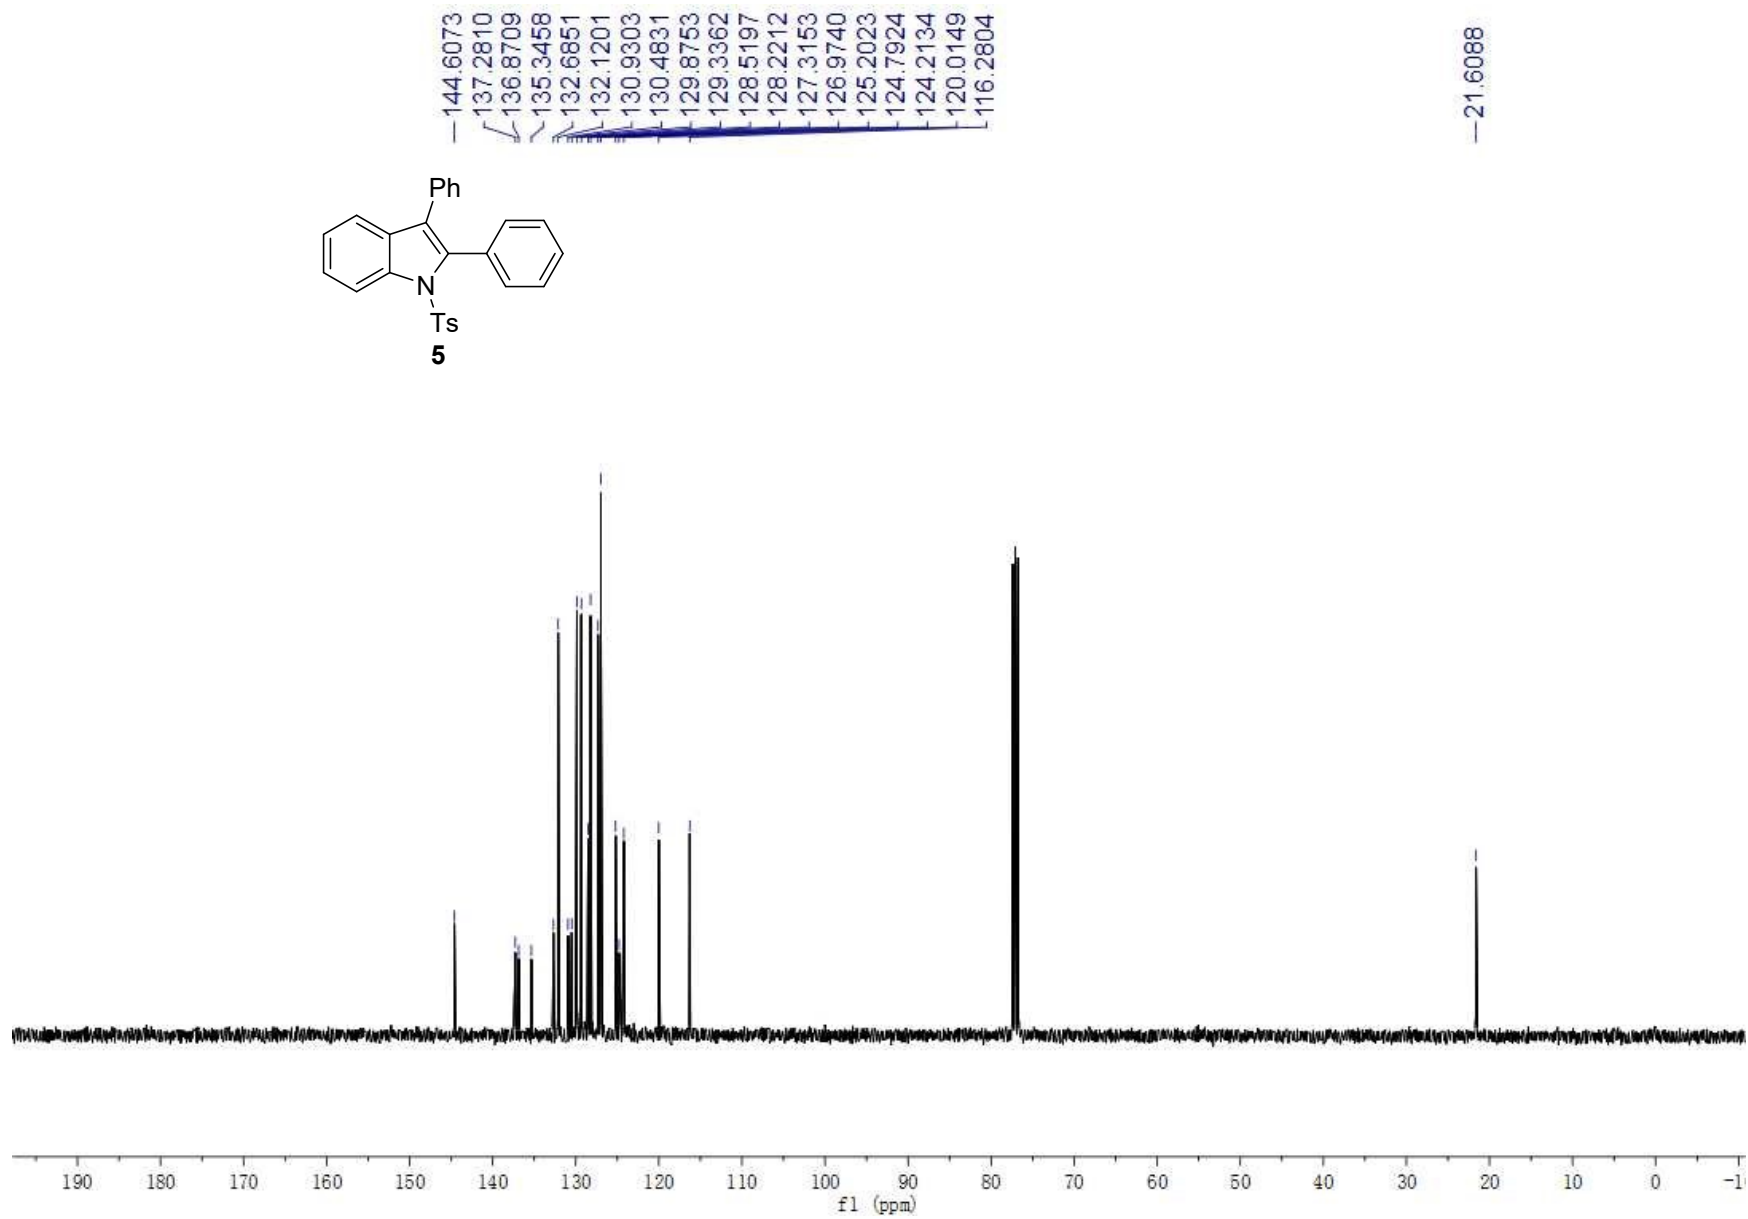

8.2114  
8.1894  
7.8781  
7.8571  
7.5584  
7.5557  
7.5380  
7.5192  
7.3666  
7.3475  
7.3299  
7.2595  
7.2414

2.4341  
2.3581

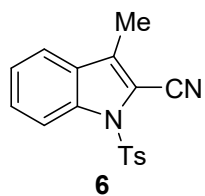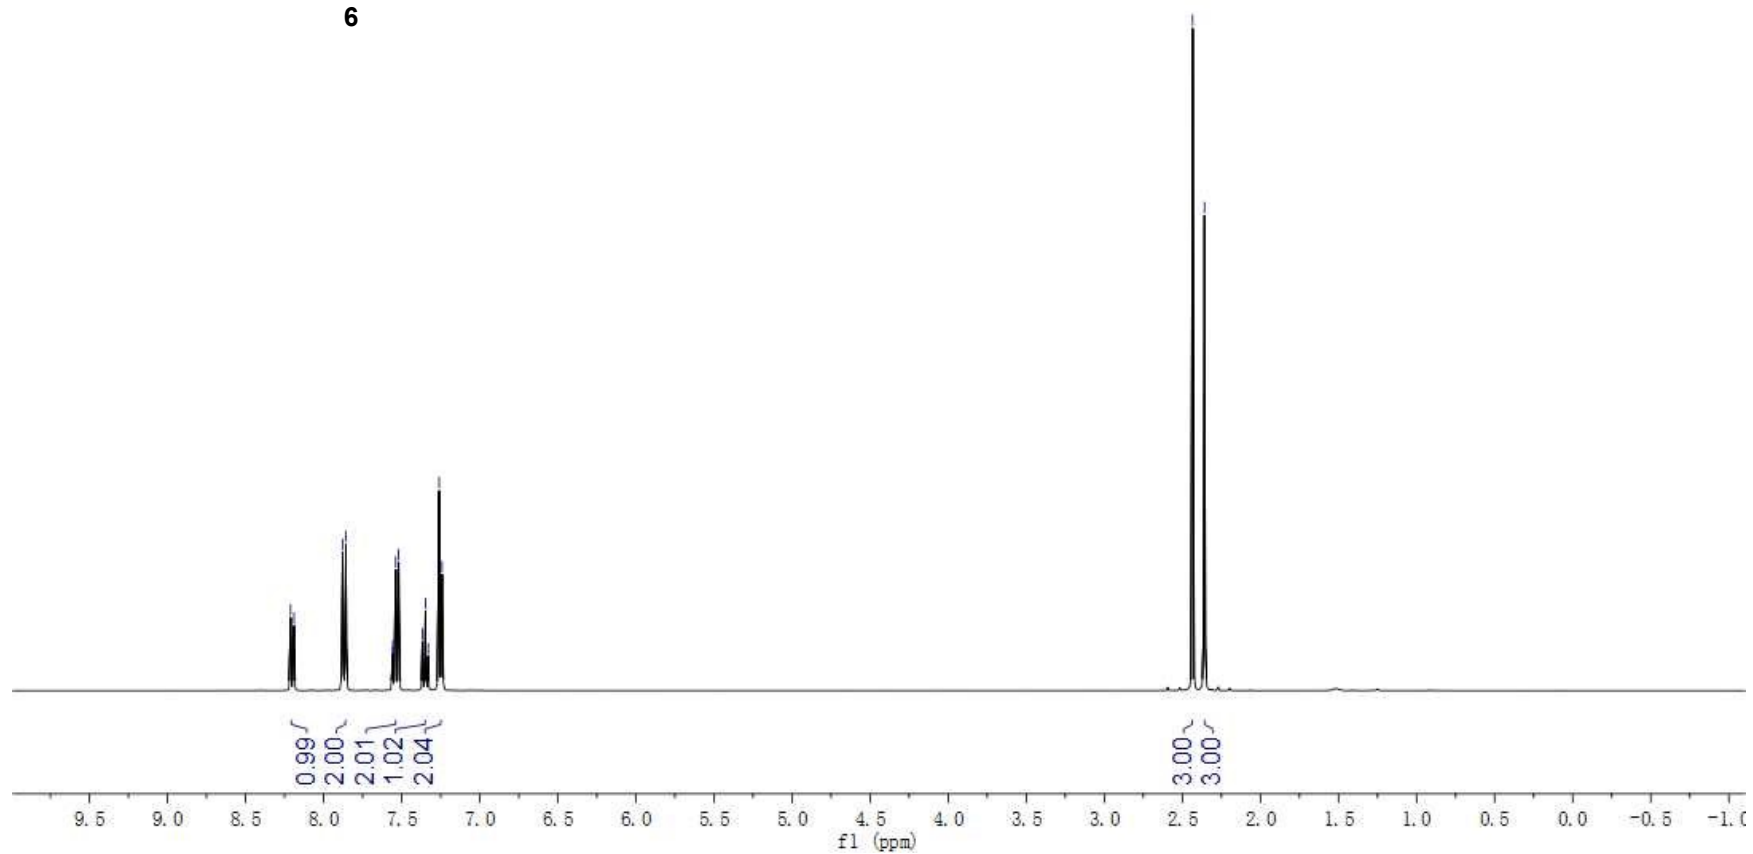

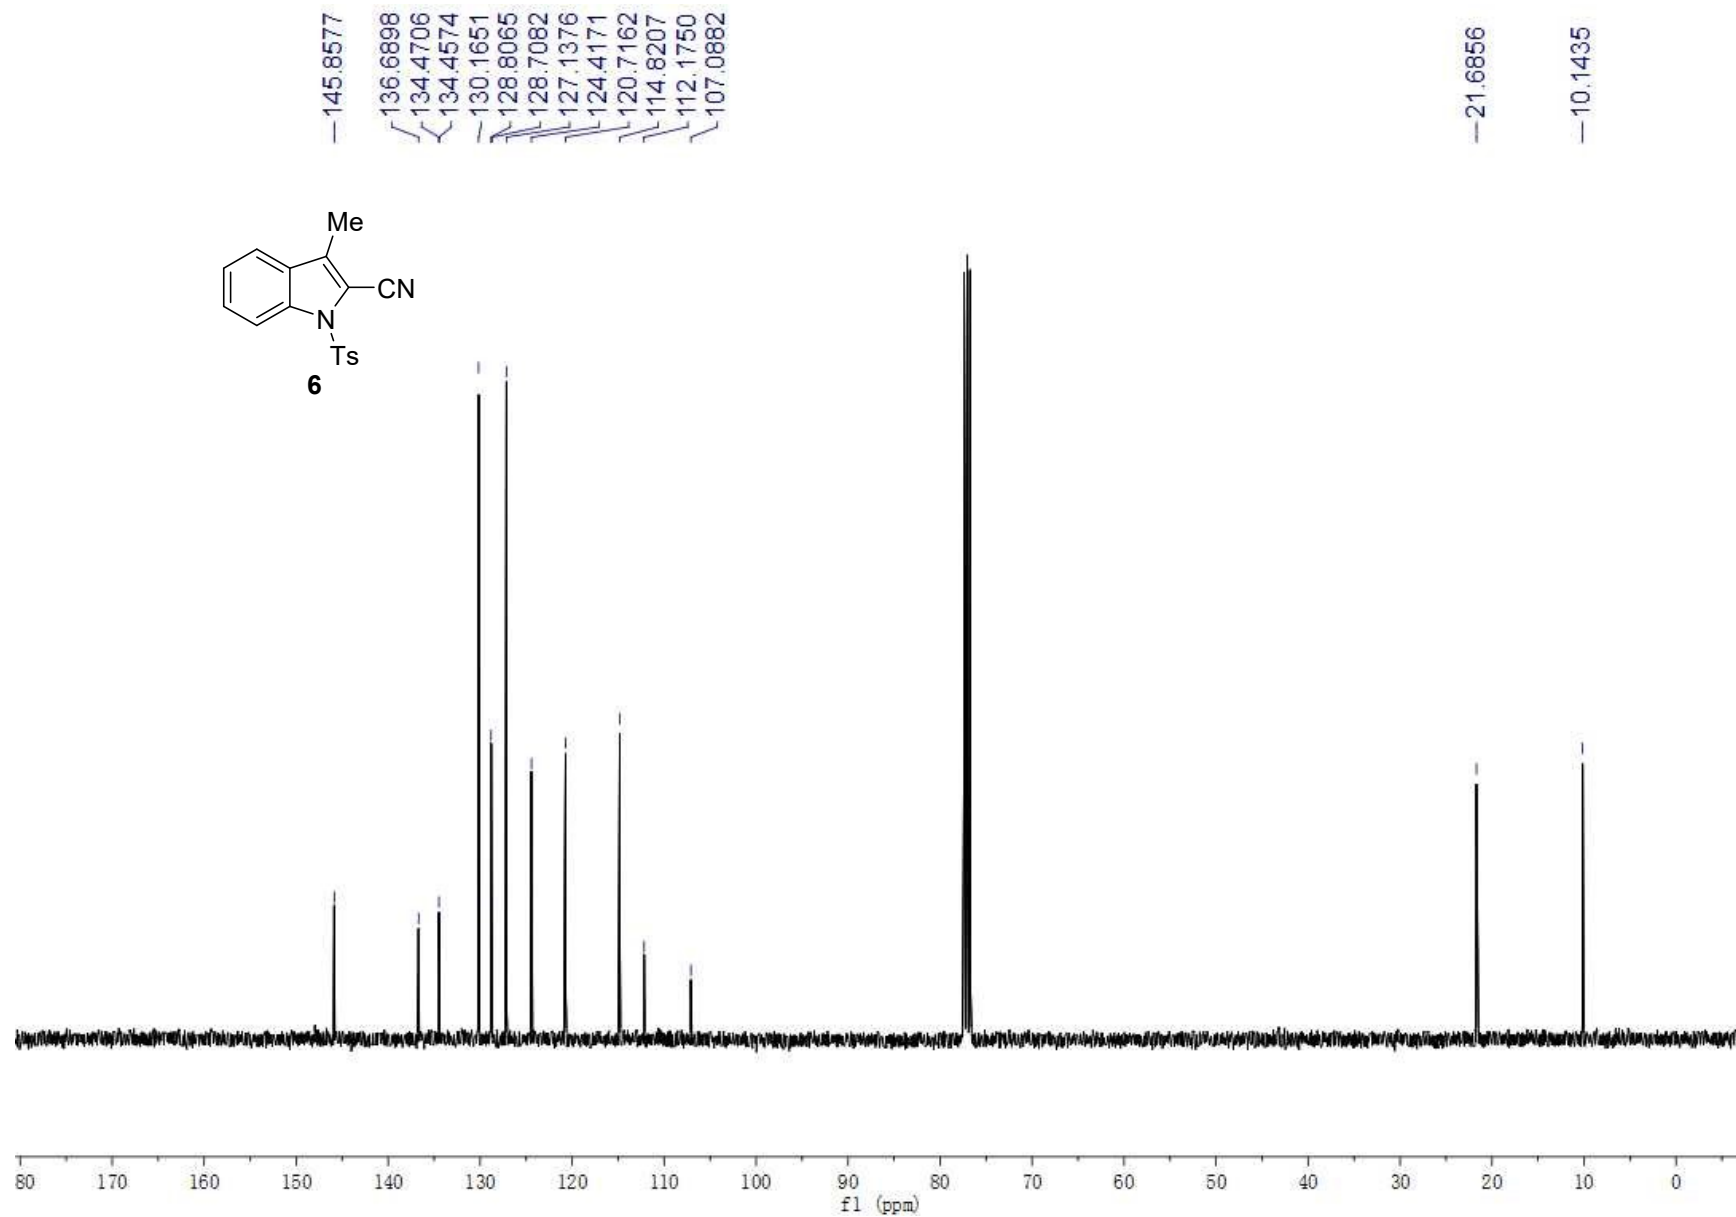

8.2742  
8.2335  
8.2303  
8.2068  
7.5738  
7.5529  
7.4370  
7.3729  
7.2602  
7.1269  
7.1155  
7.0959  
6.1359  
6.0957

4.3522  
4.3344  
4.3166  
4.2987

2.3005  
2.2918

1.4052  
1.3873  
1.3695

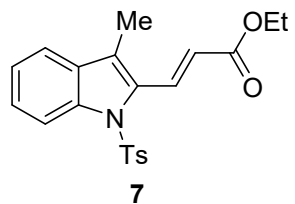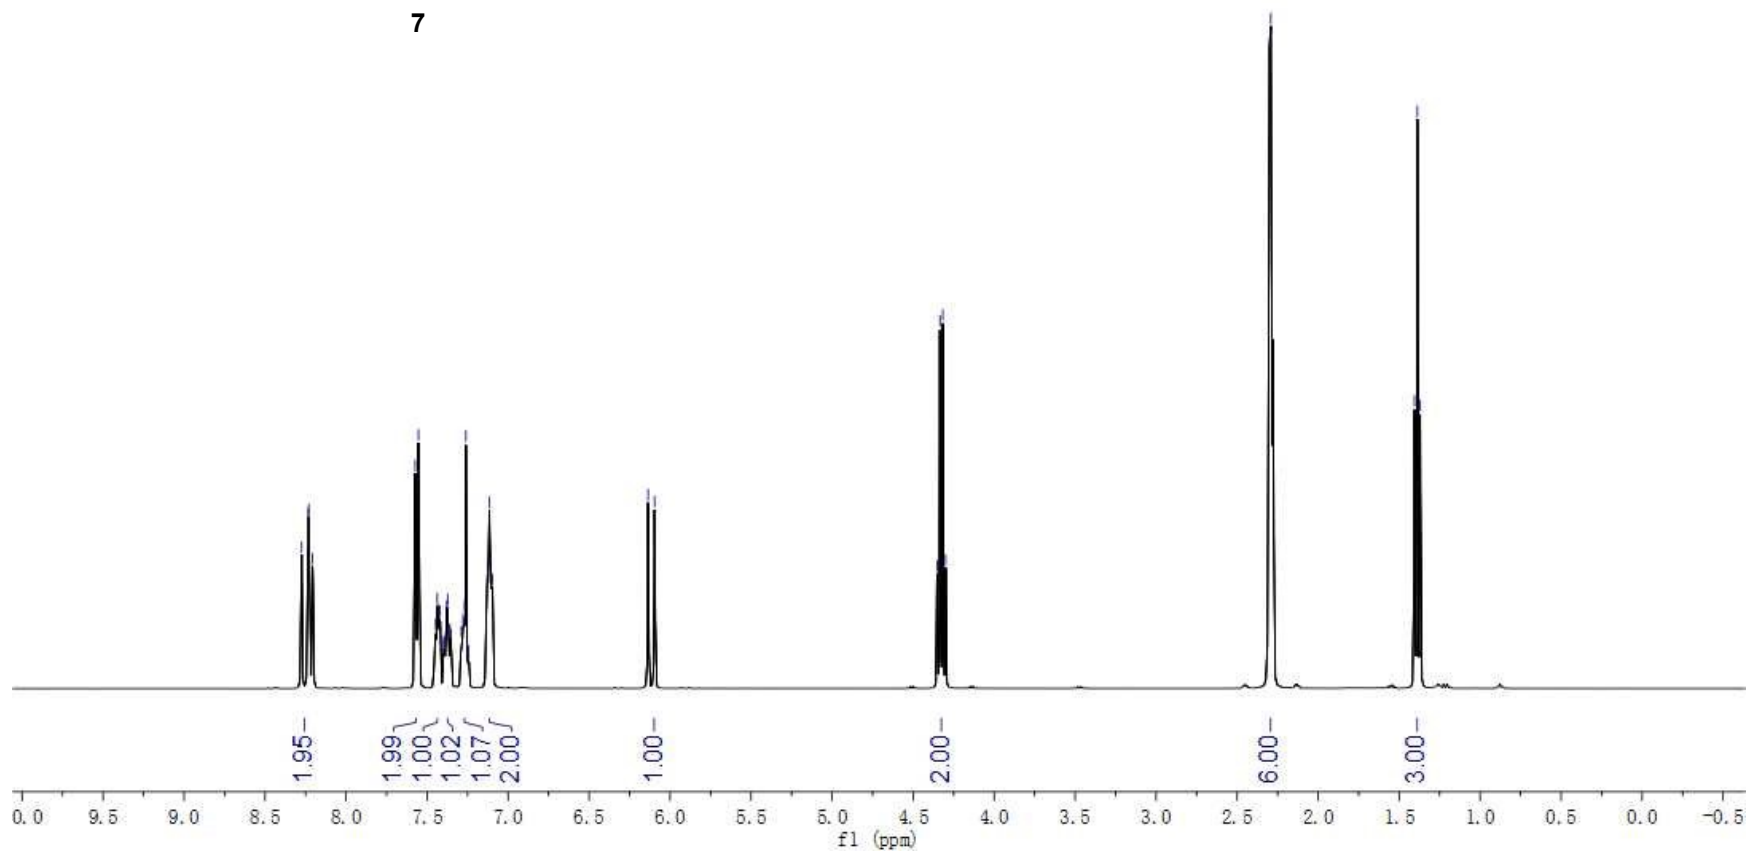



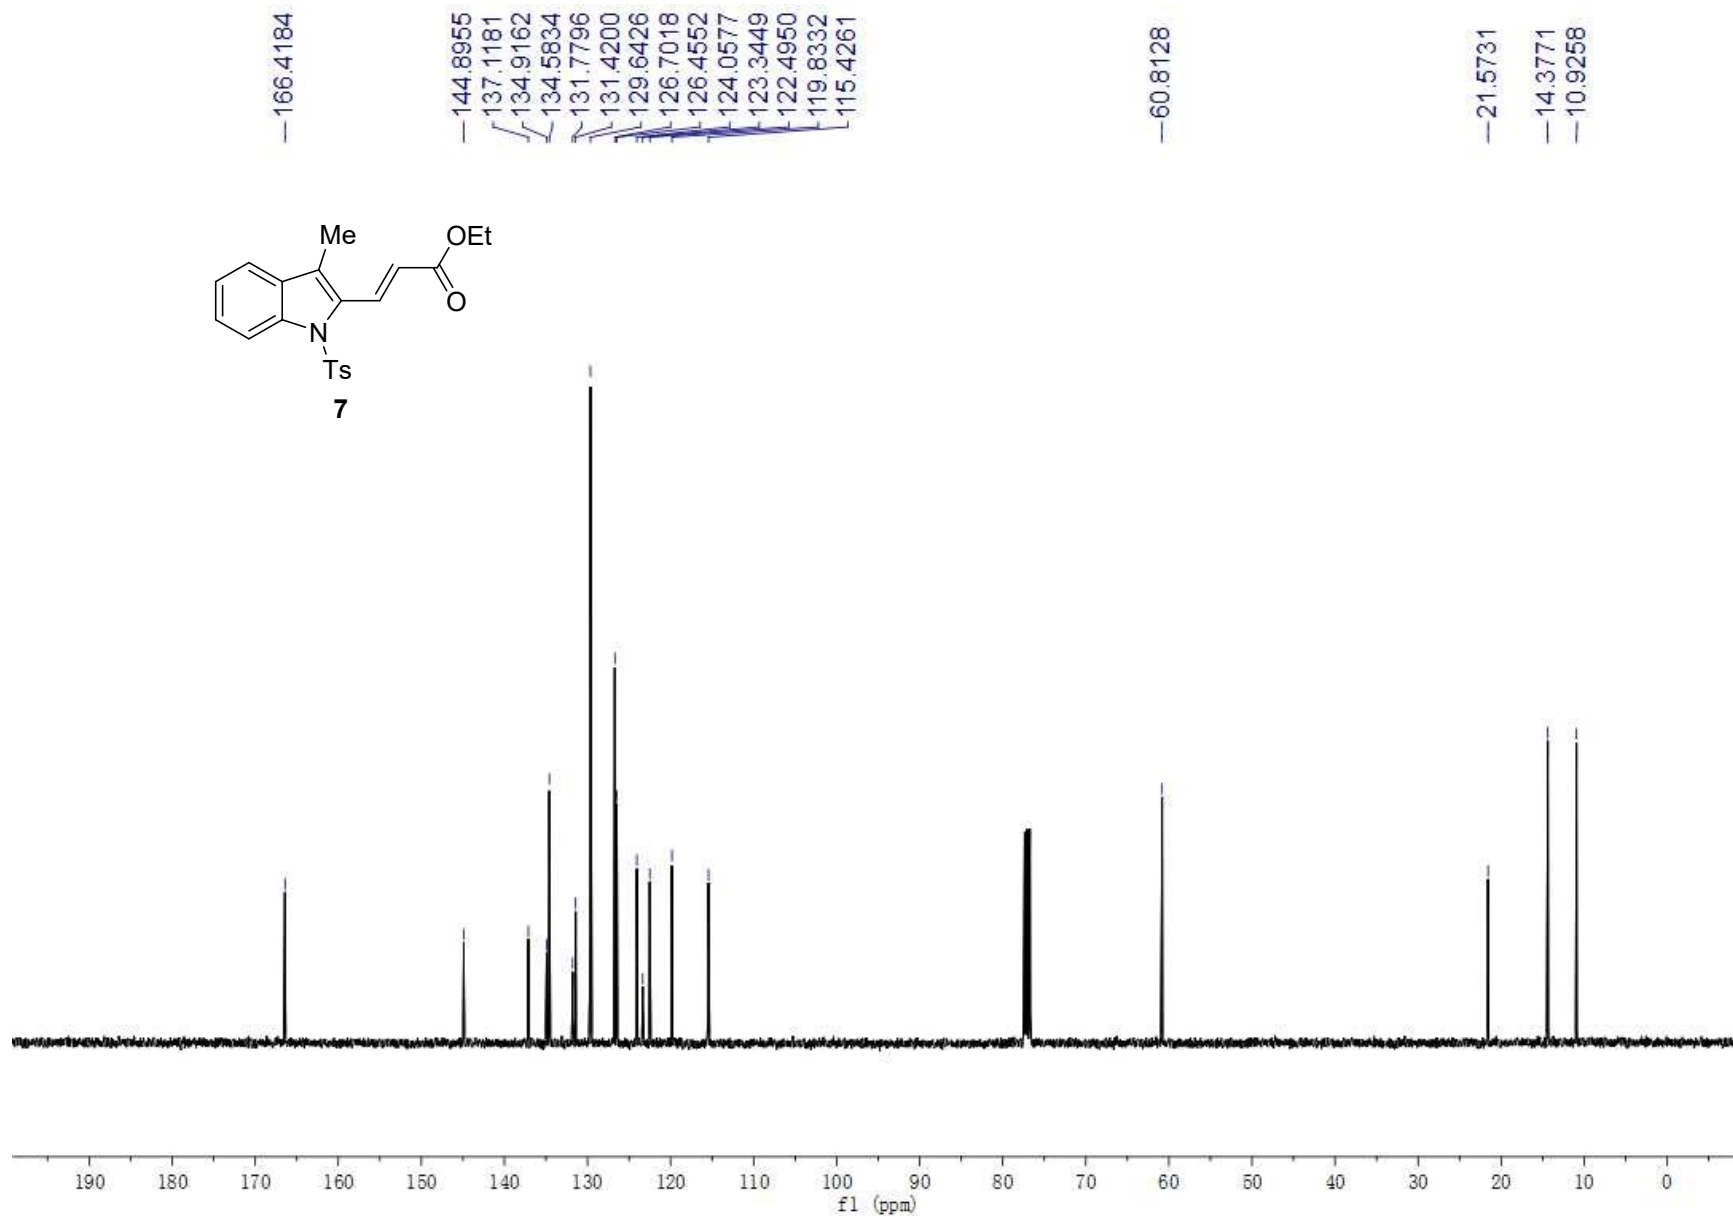

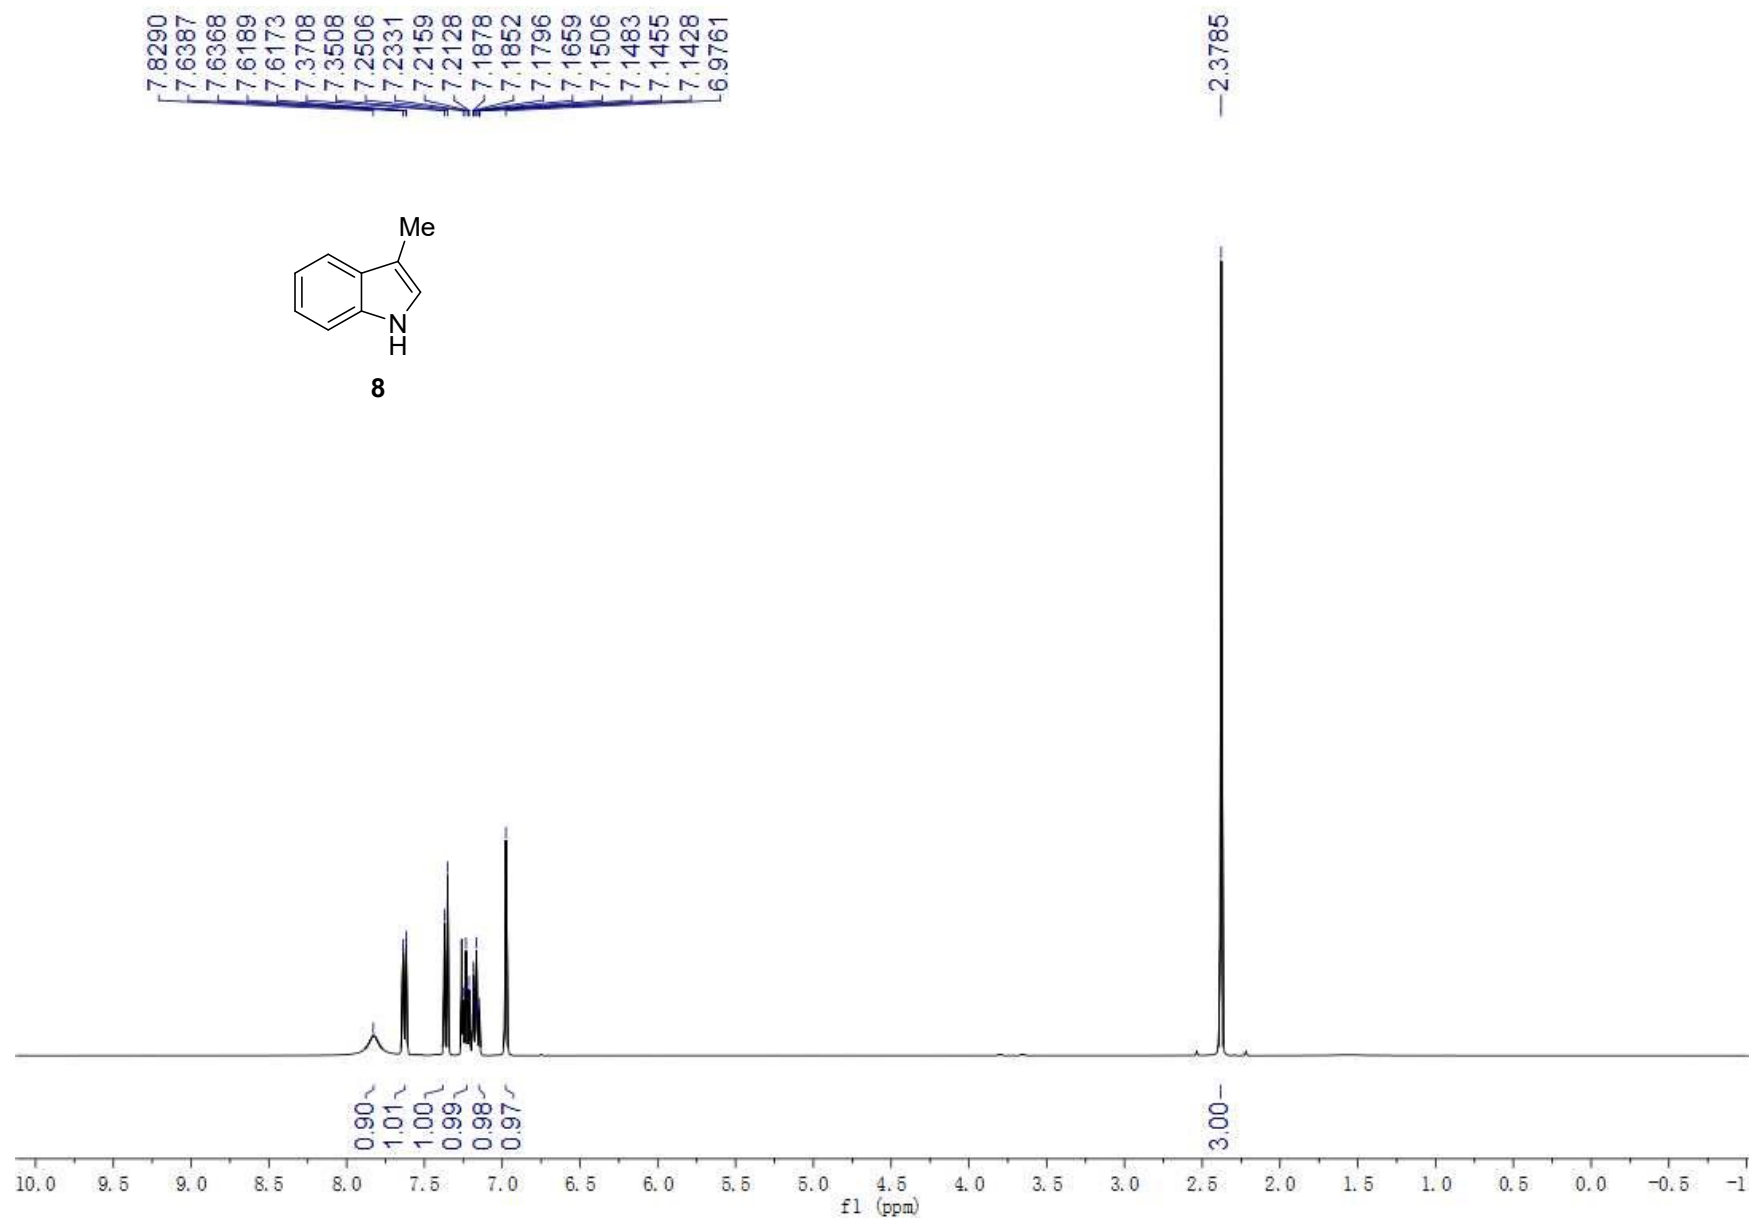

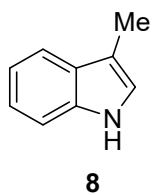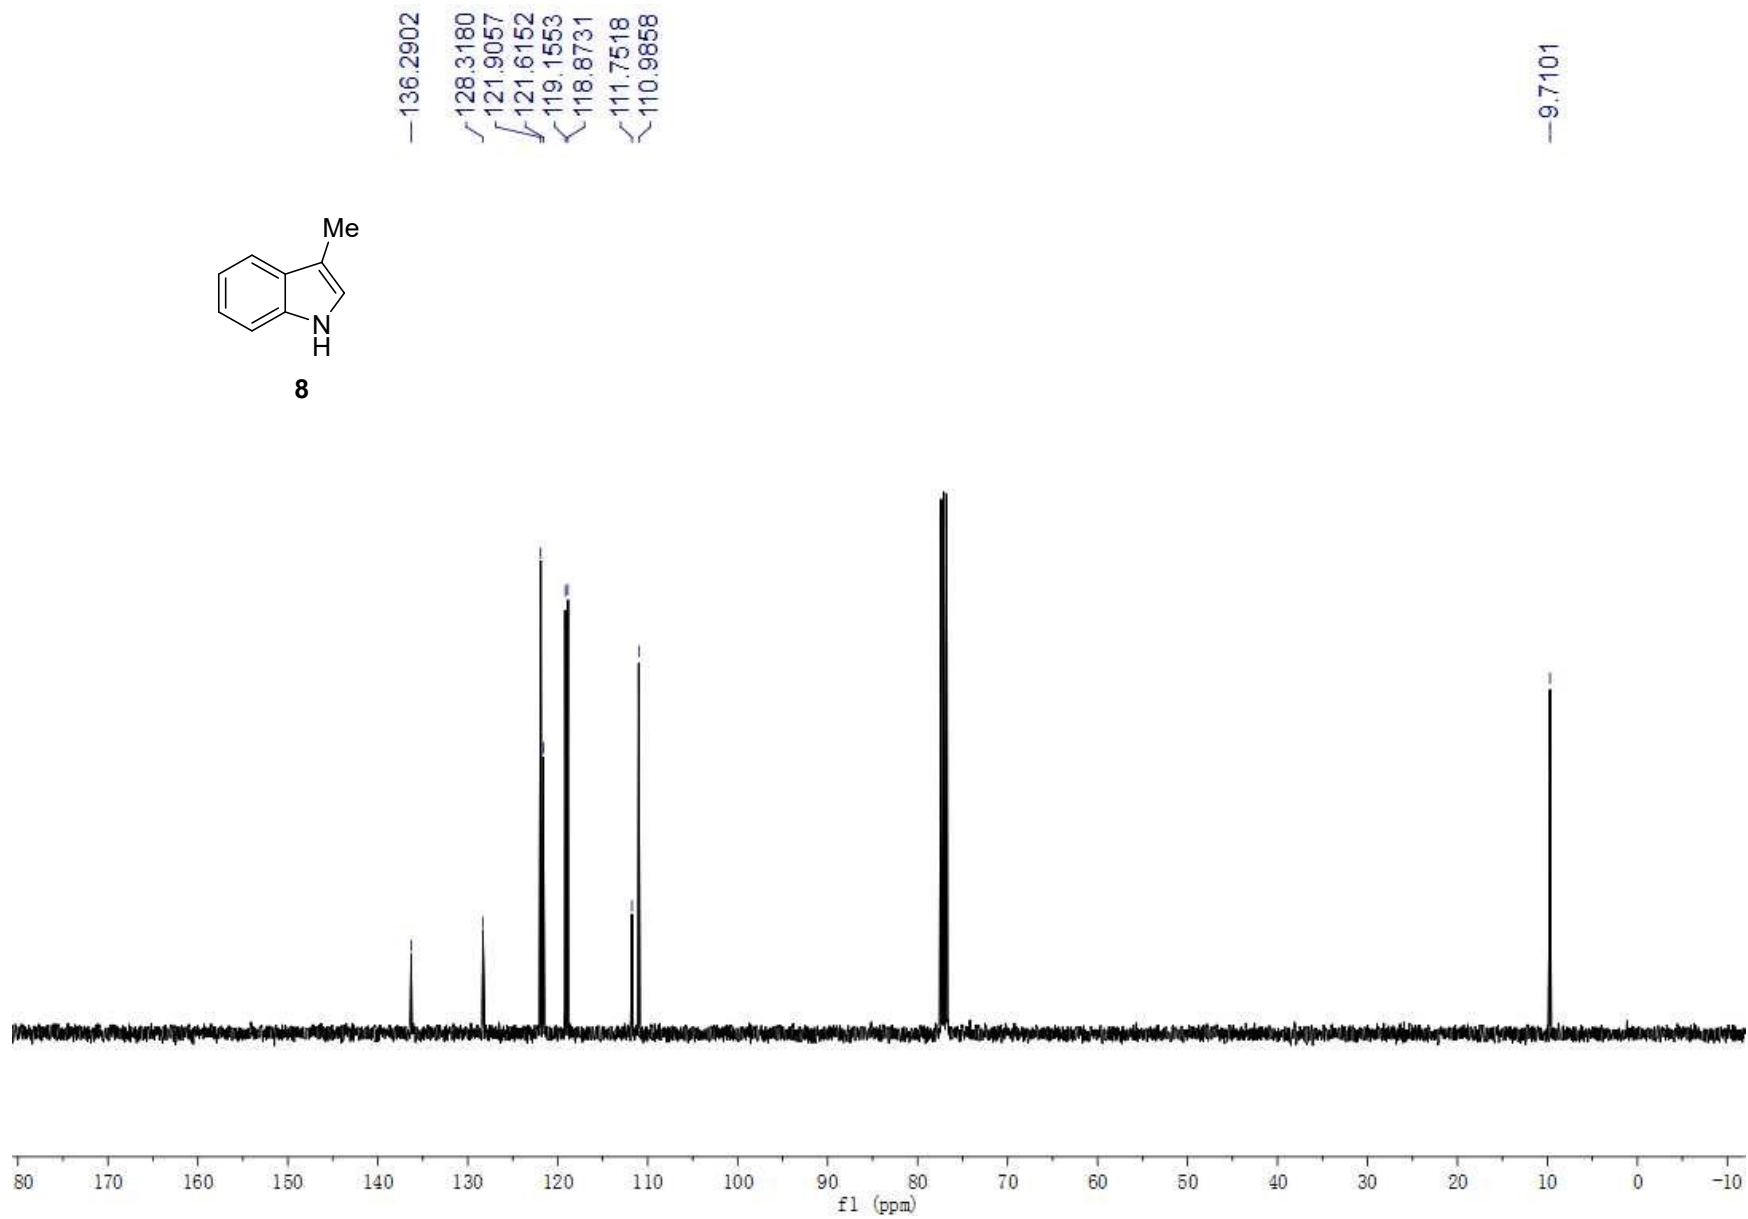

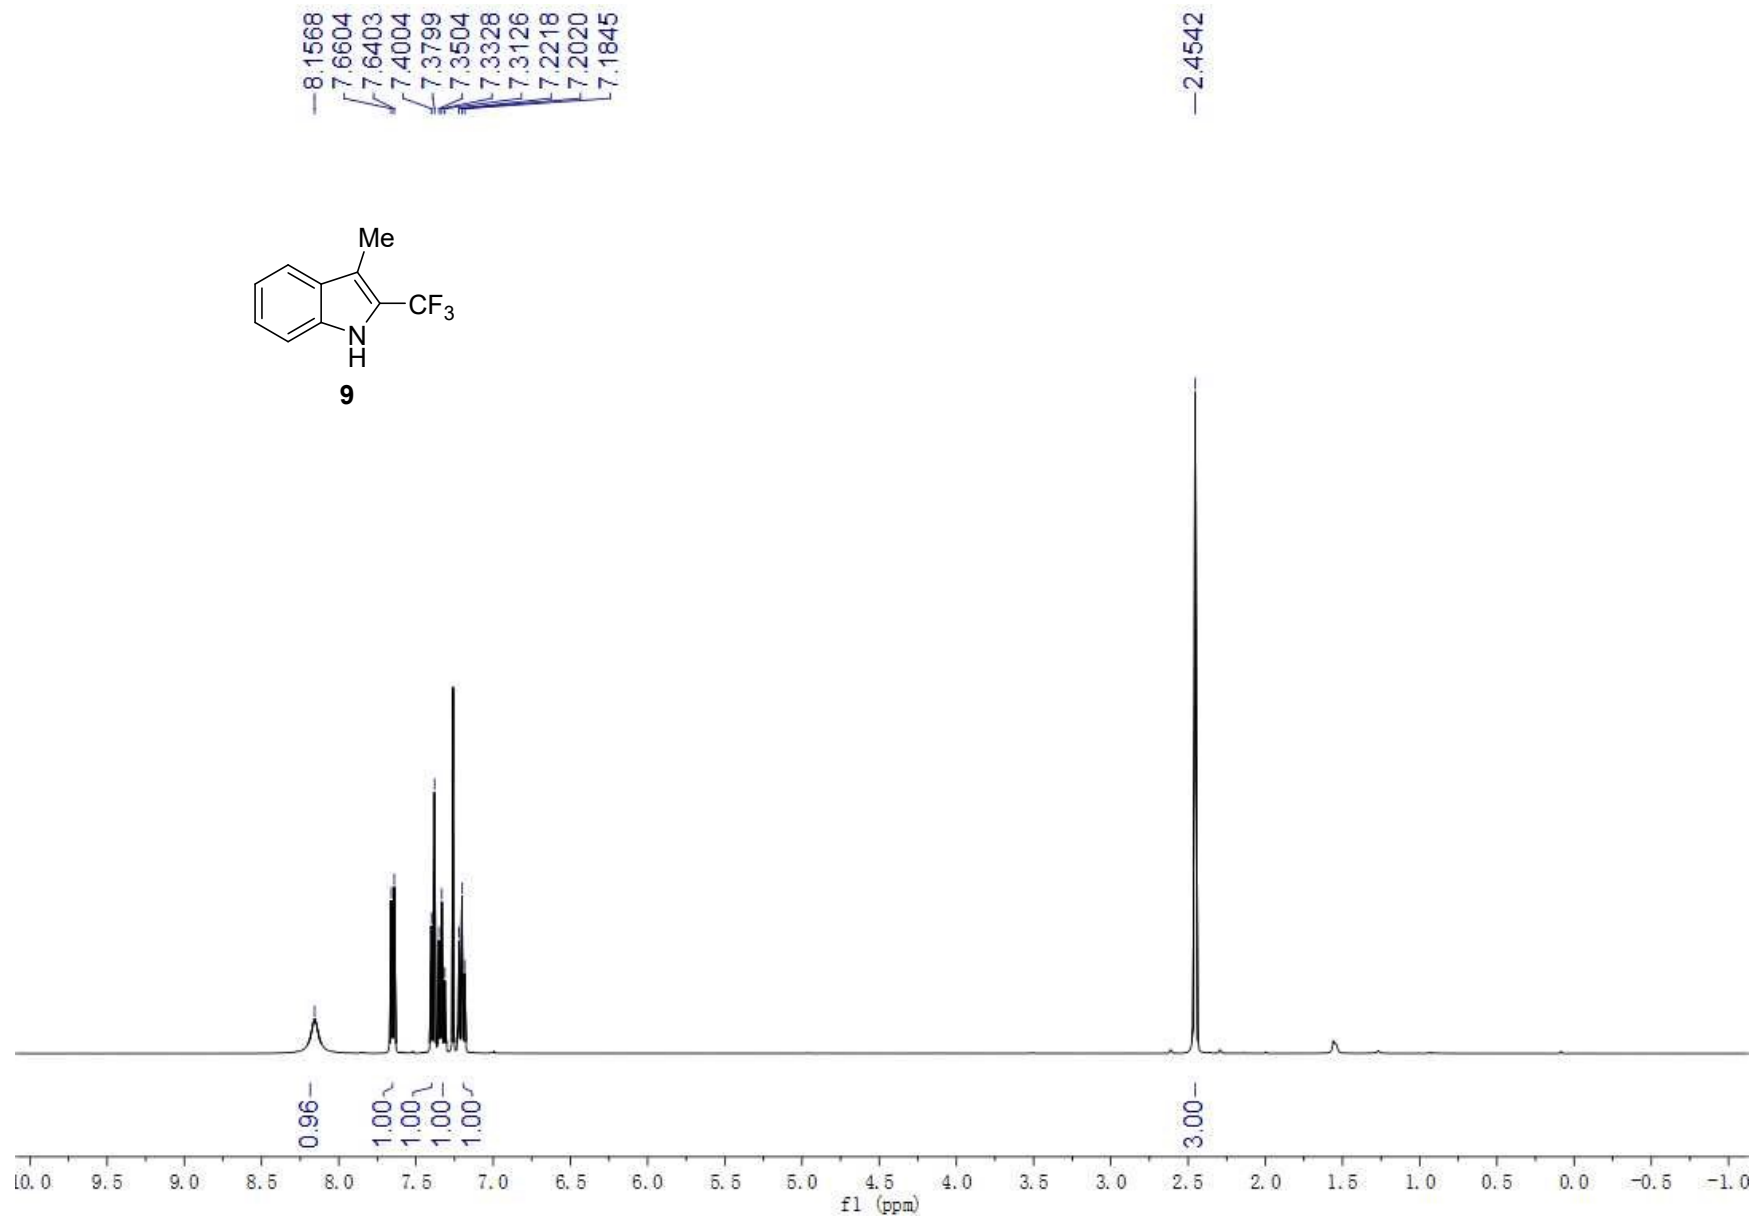

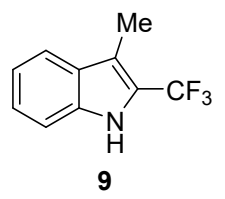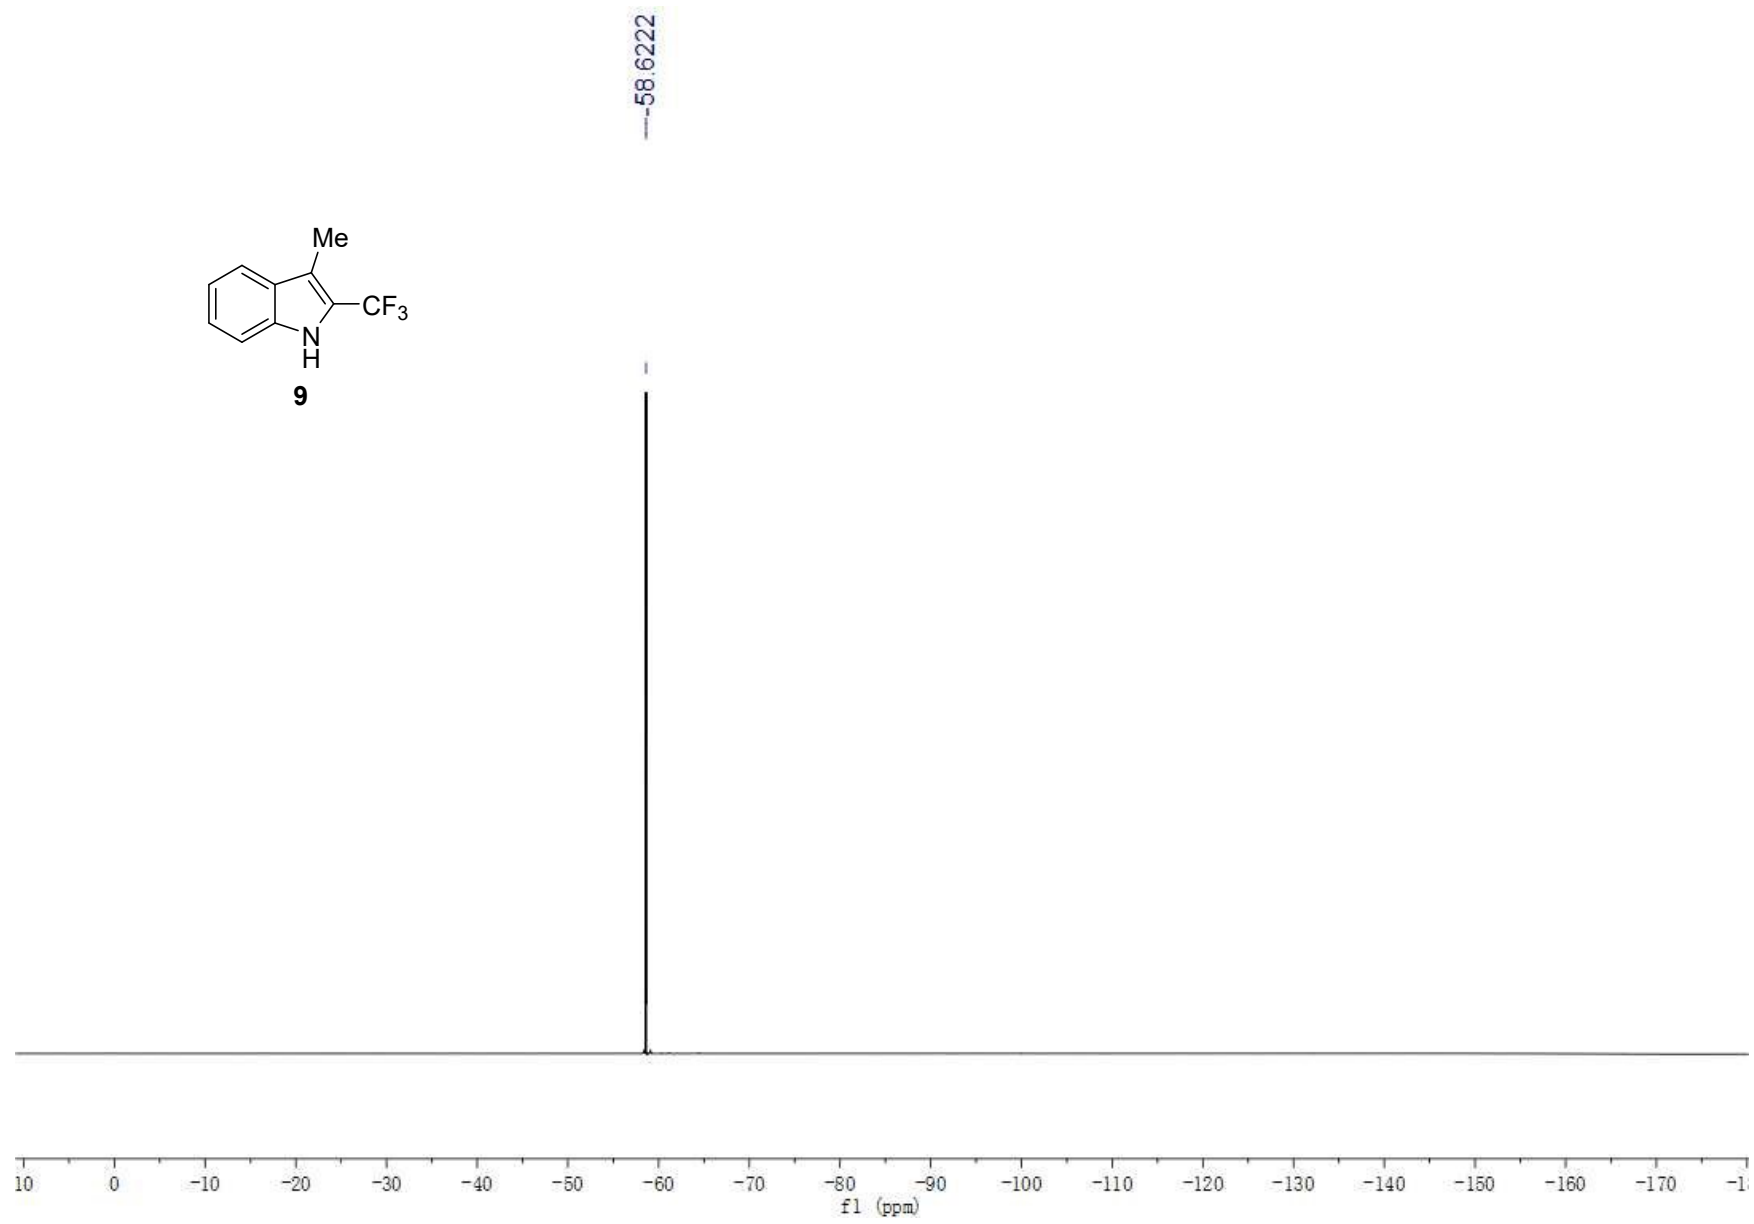

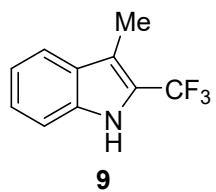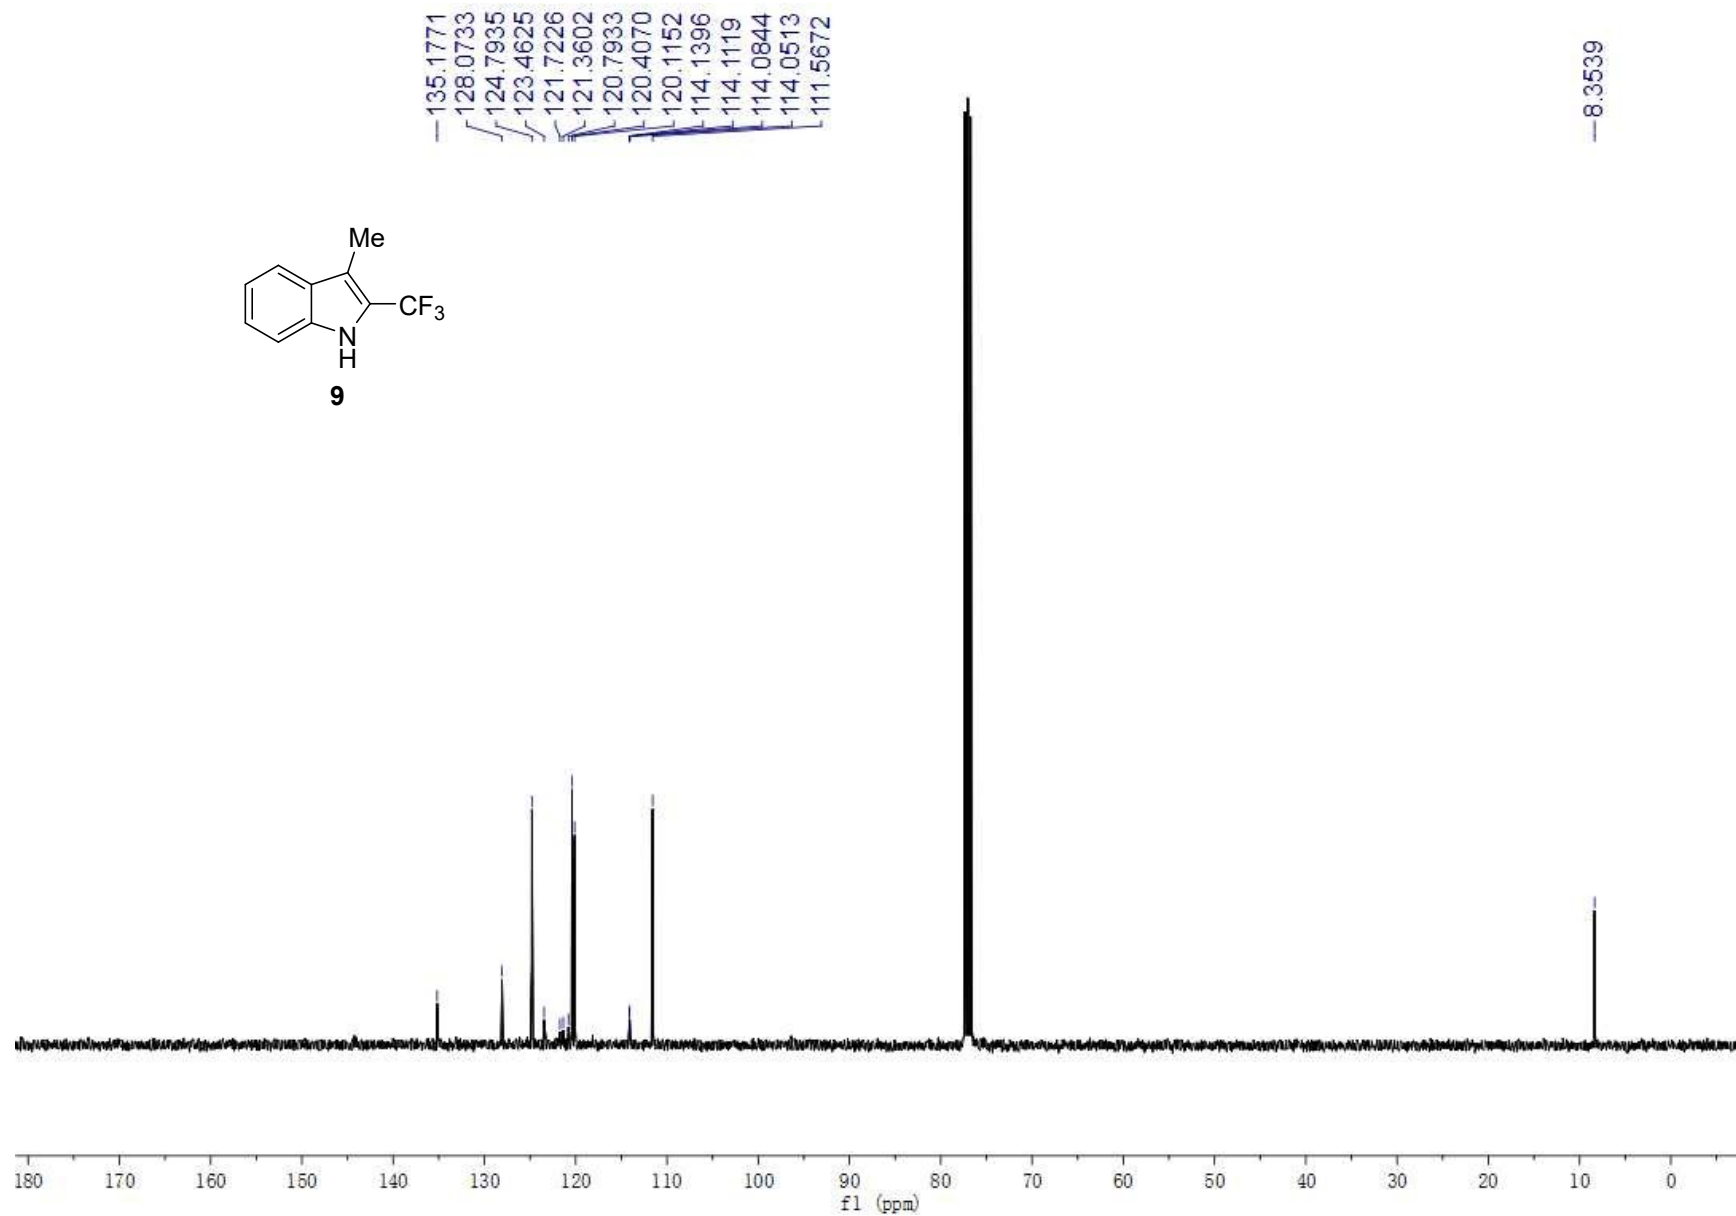

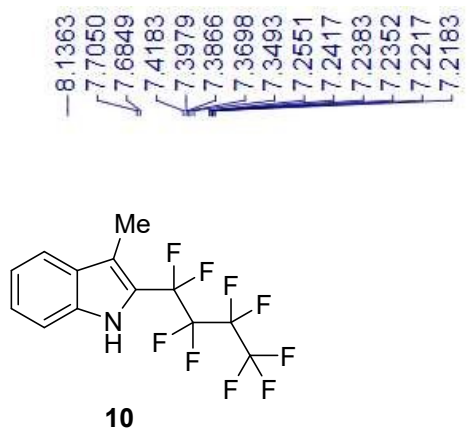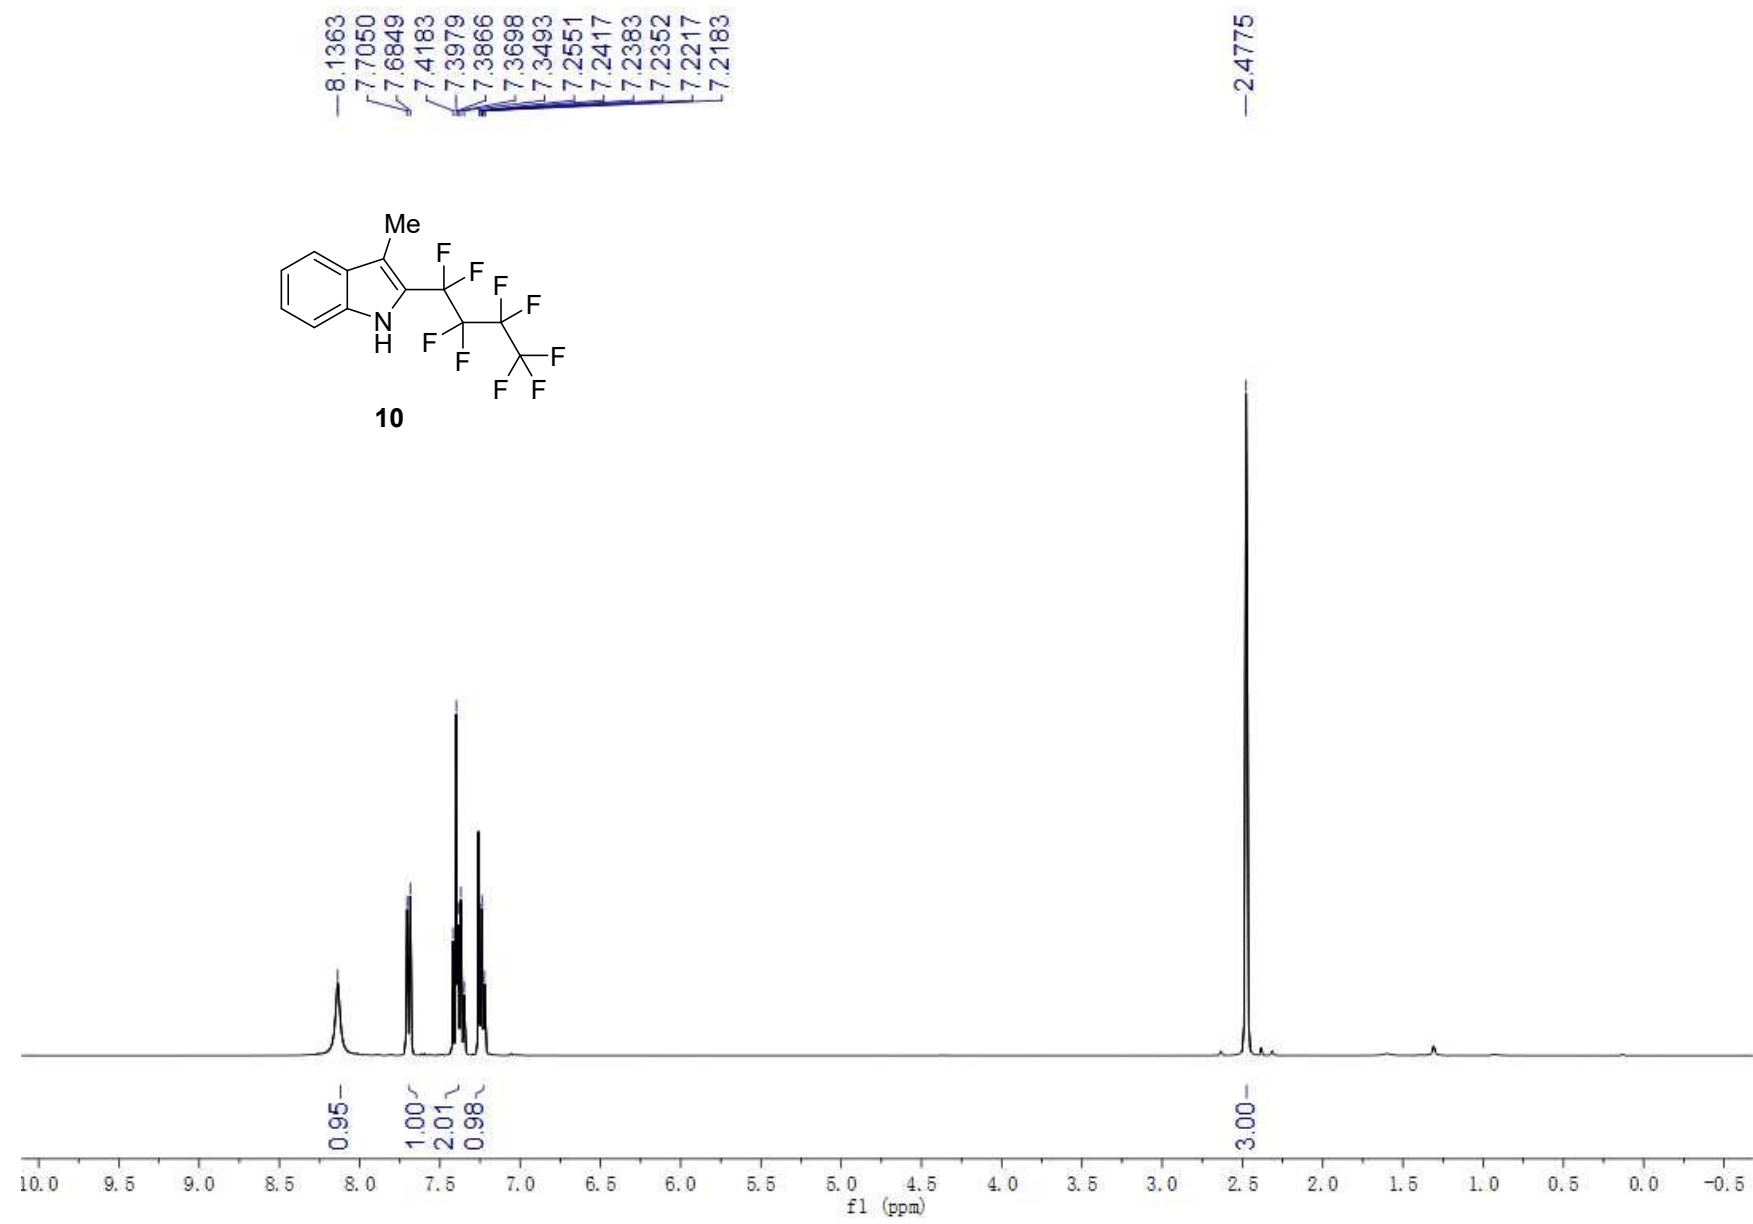

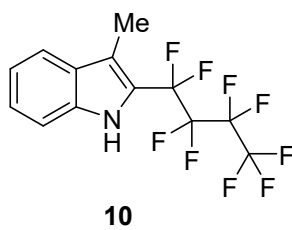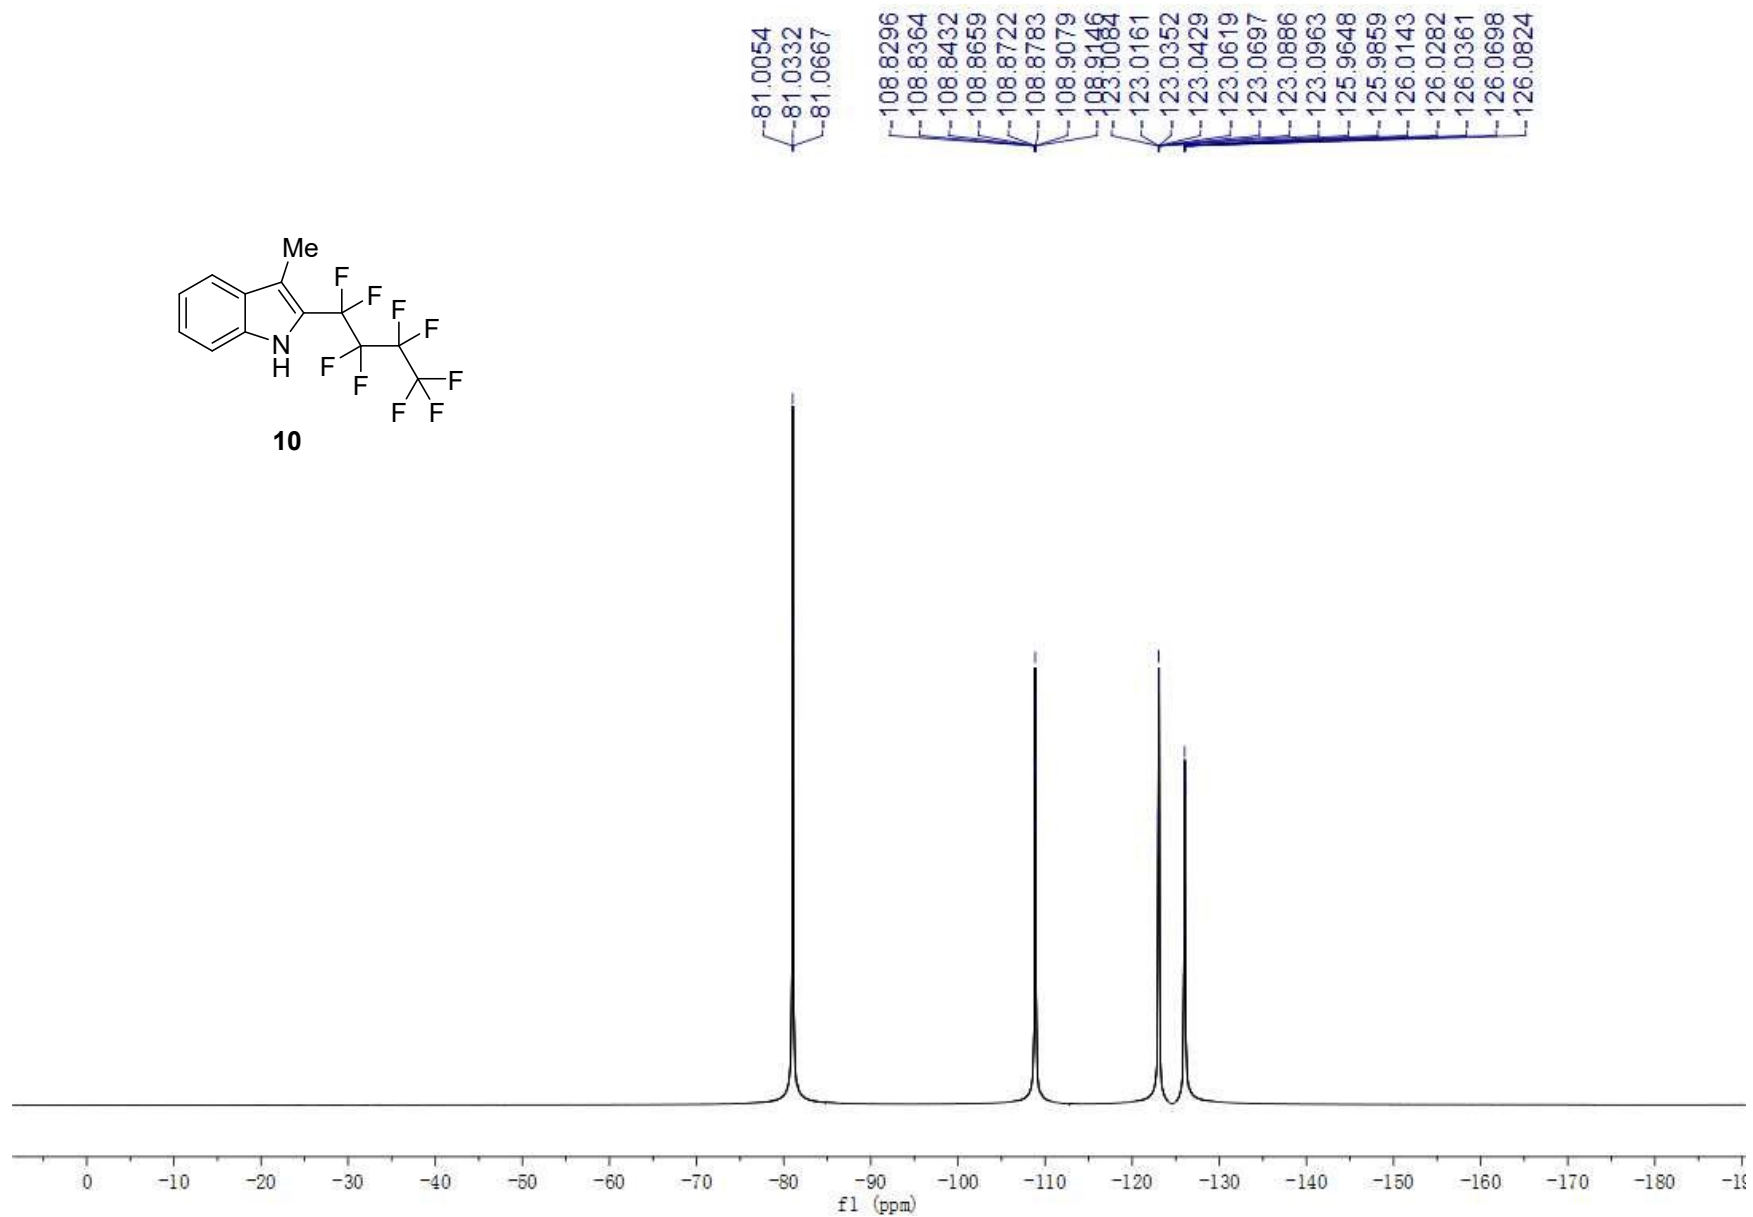



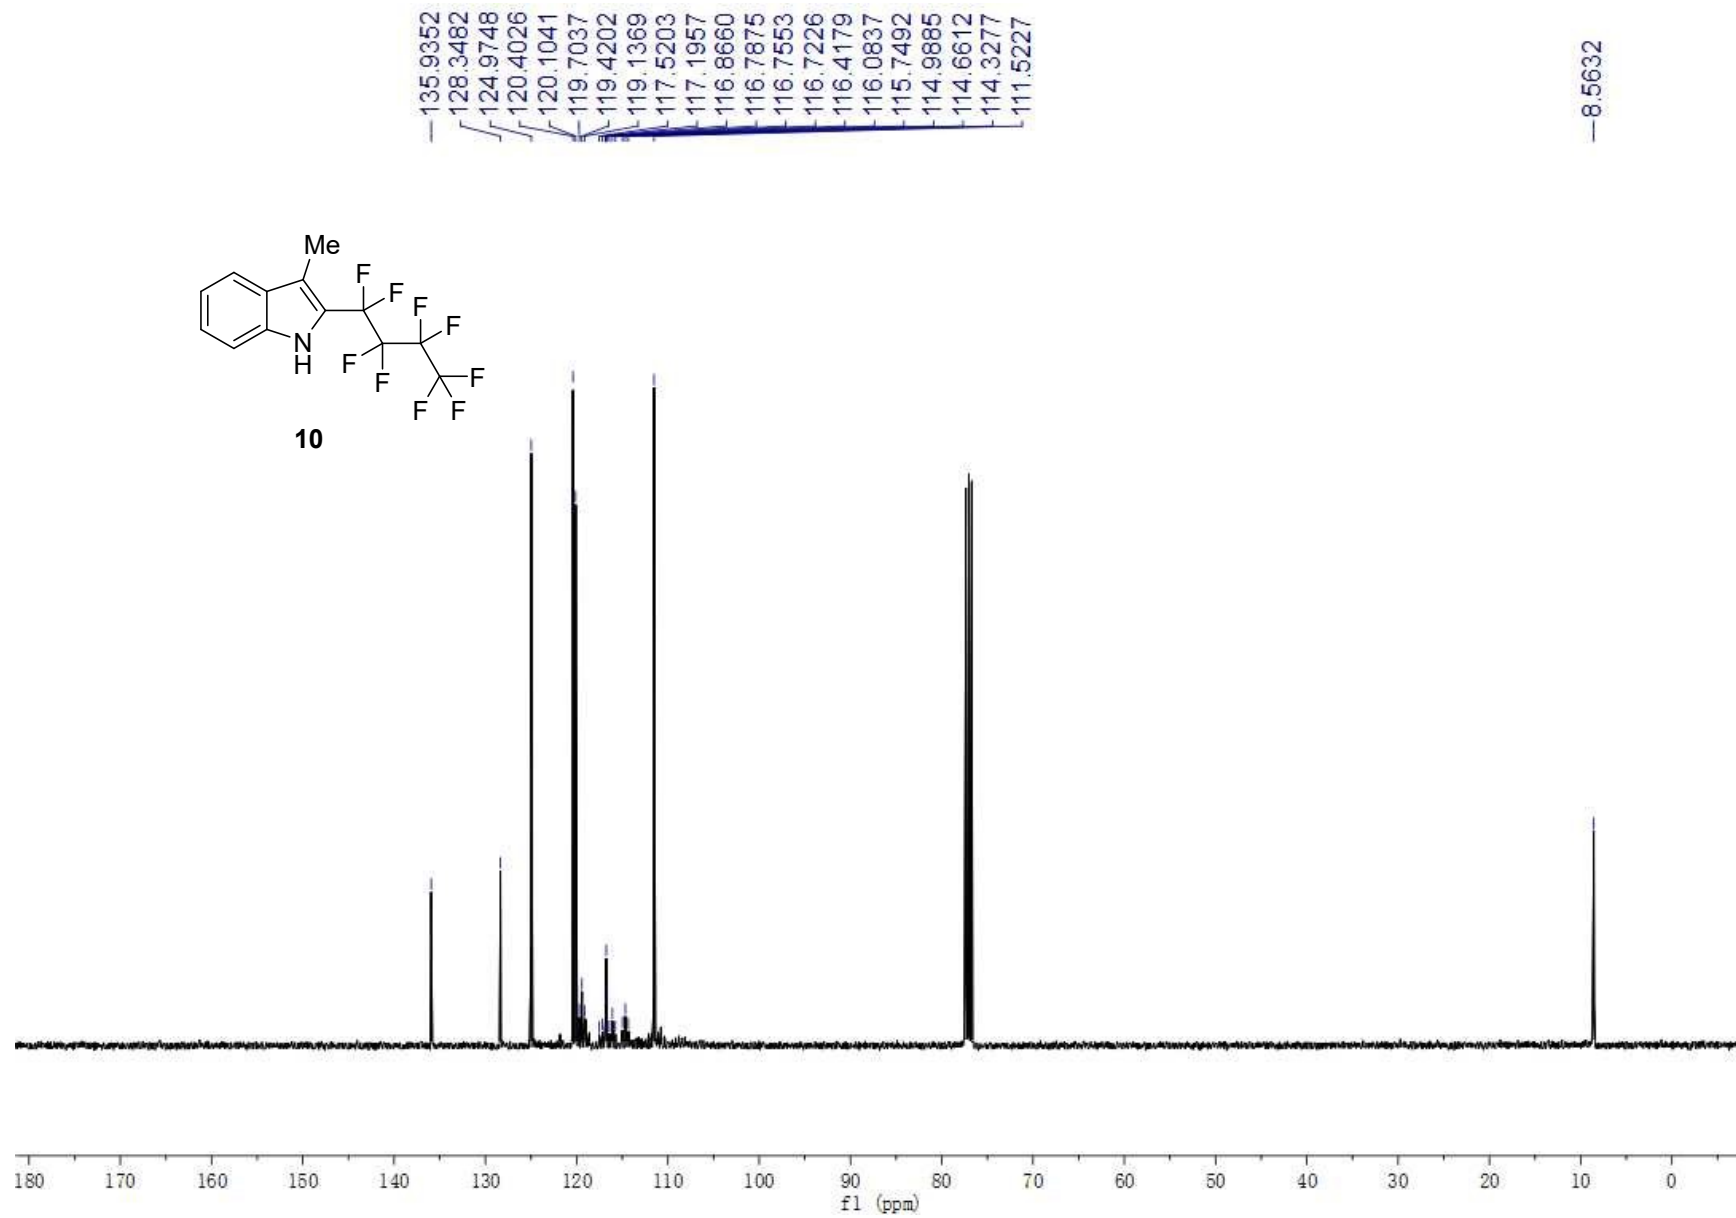

7.7585  
7.7384  
7.6979  
7.6769  
7.4838  
7.4656  
7.4601  
7.4522  
7.4466  
7.4175  
7.4091  
7.4028  
7.3565  
7.3369  
7.3182  
7.2994  
7.2797  
6.9873  
6.9637  
6.1782  
6.1563

—2.5809

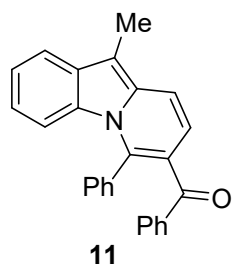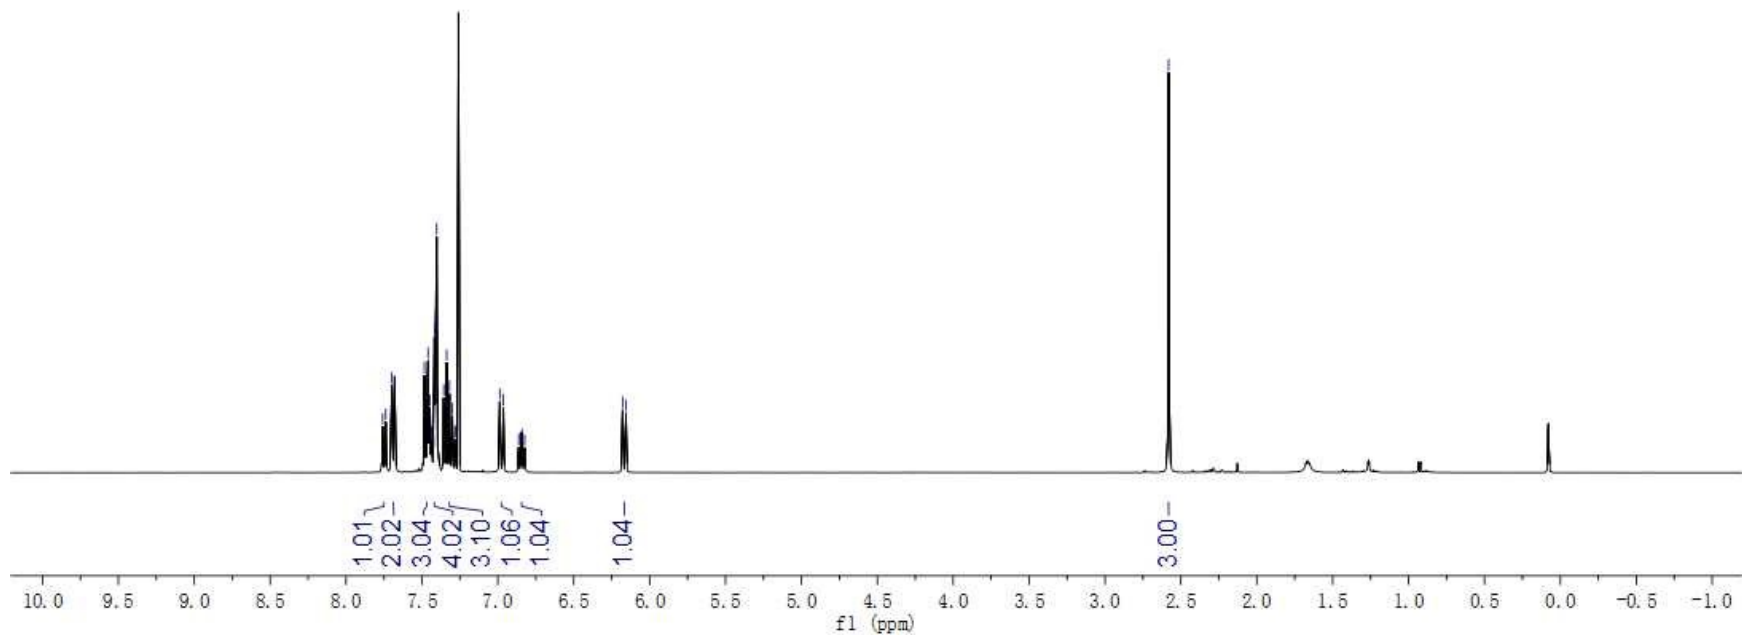

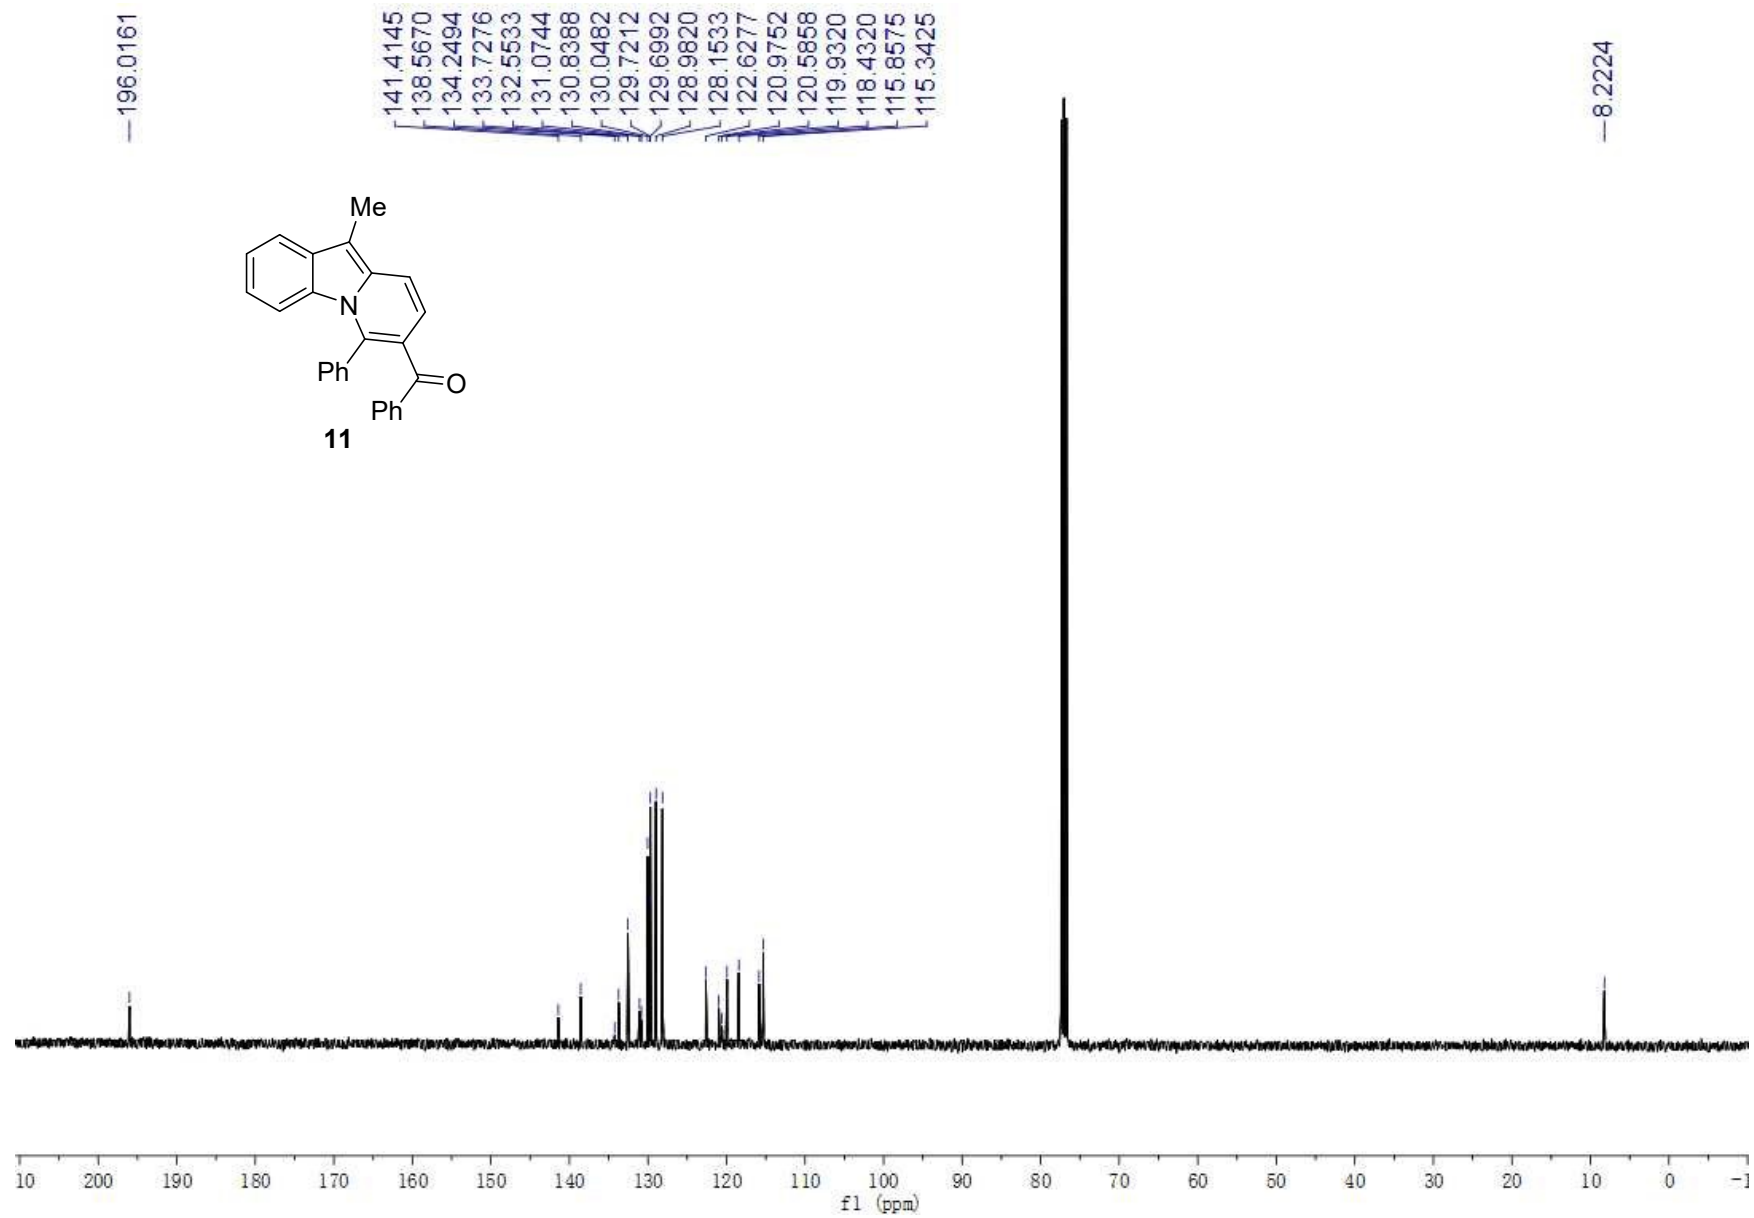

7.7427  
7.7224  
7.6994  
7.6831  
7.5860  
7.5713  
7.5555  
7.5513  
7.5468  
7.5343  
7.4991  
7.4800  
7.4604  
7.4389  
7.4207  
7.3641  
7.3454  
7.2170  
7.2011  
7.1983  
7.1829  
7.1797  
7.1691  
7.1660  
7.1494  
7.1471  
7.0498  
4.8014  
4.4835  
4.4656  
4.4476

1.4724  
1.4544

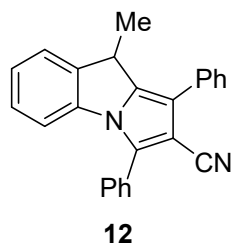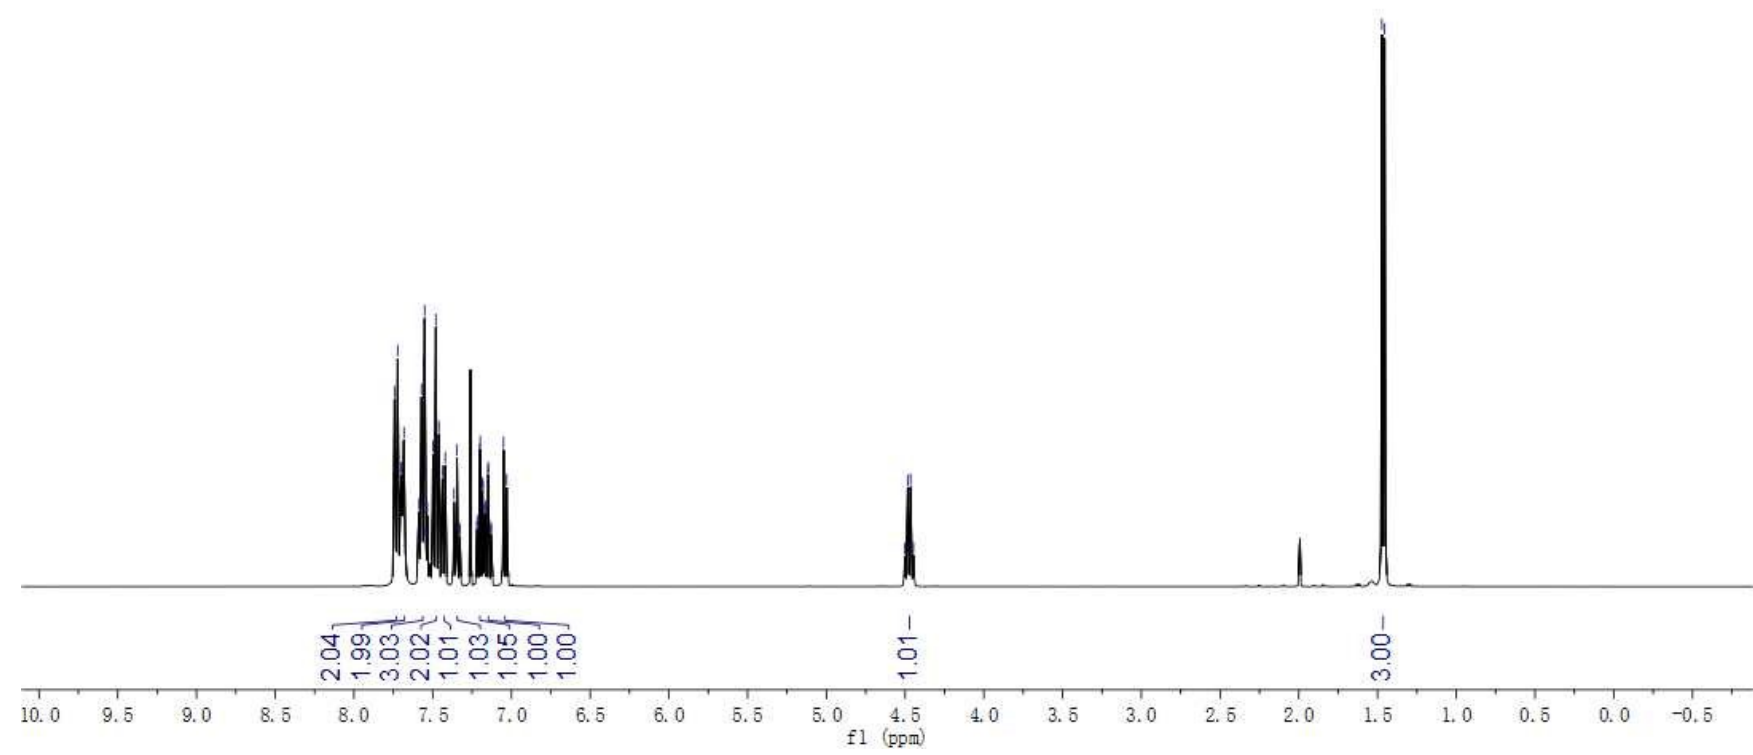

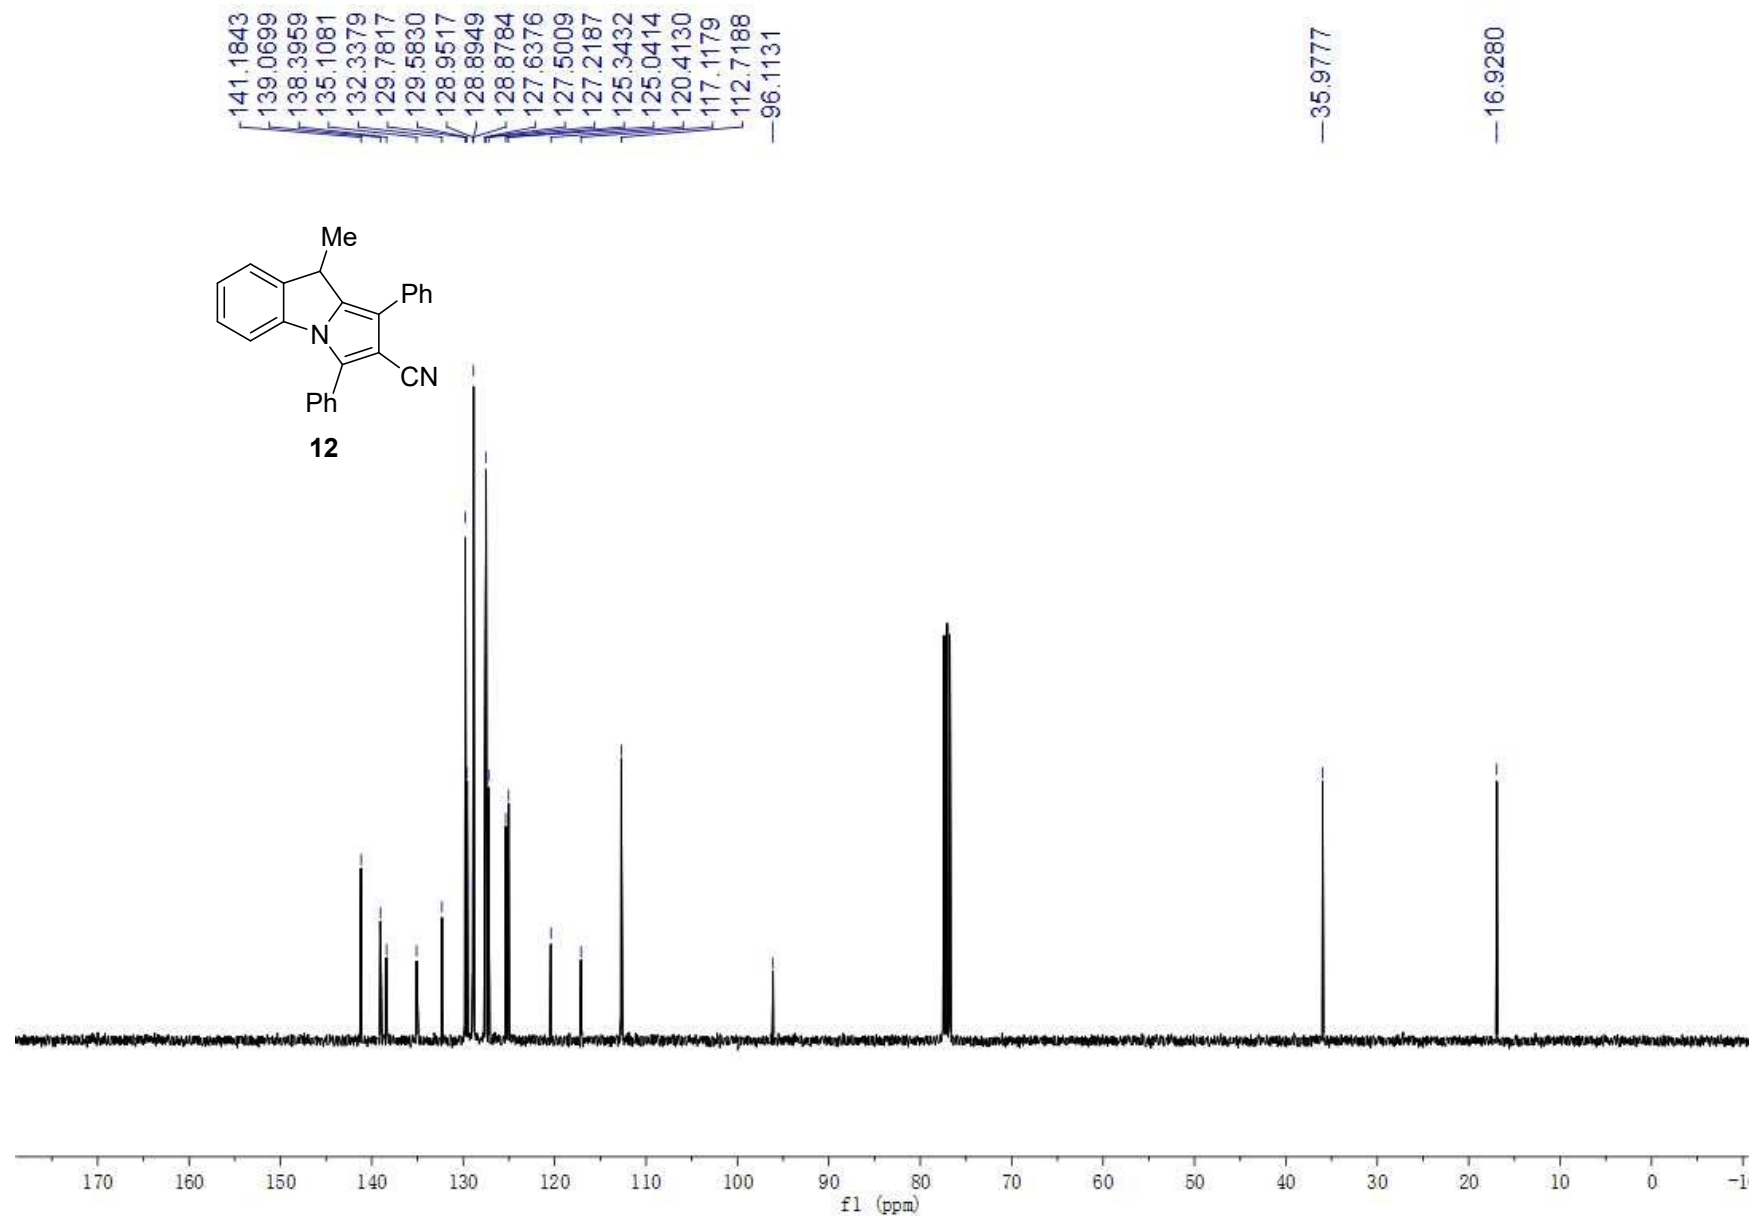

7.8703  
7.8591  
7.6609  
7.6518  
7.6493  
7.6463  
7.6430  
7.6301  
7.6195  
7.6160  
7.4779  
7.4649  
7.4328  
7.4294  
7.4212  
7.4166  
7.4082  
7.4049  
7.1820  
7.1794  
7.1709  
7.1686  
7.1580  
7.1553  
7.1271  
7.1182  
7.1150  
7.1067  
7.1045  
7.0935  
7.0909  
7.0785  
7.0193  
3.9986  
3.9966

—1.8555

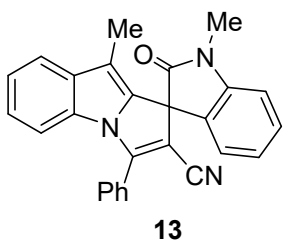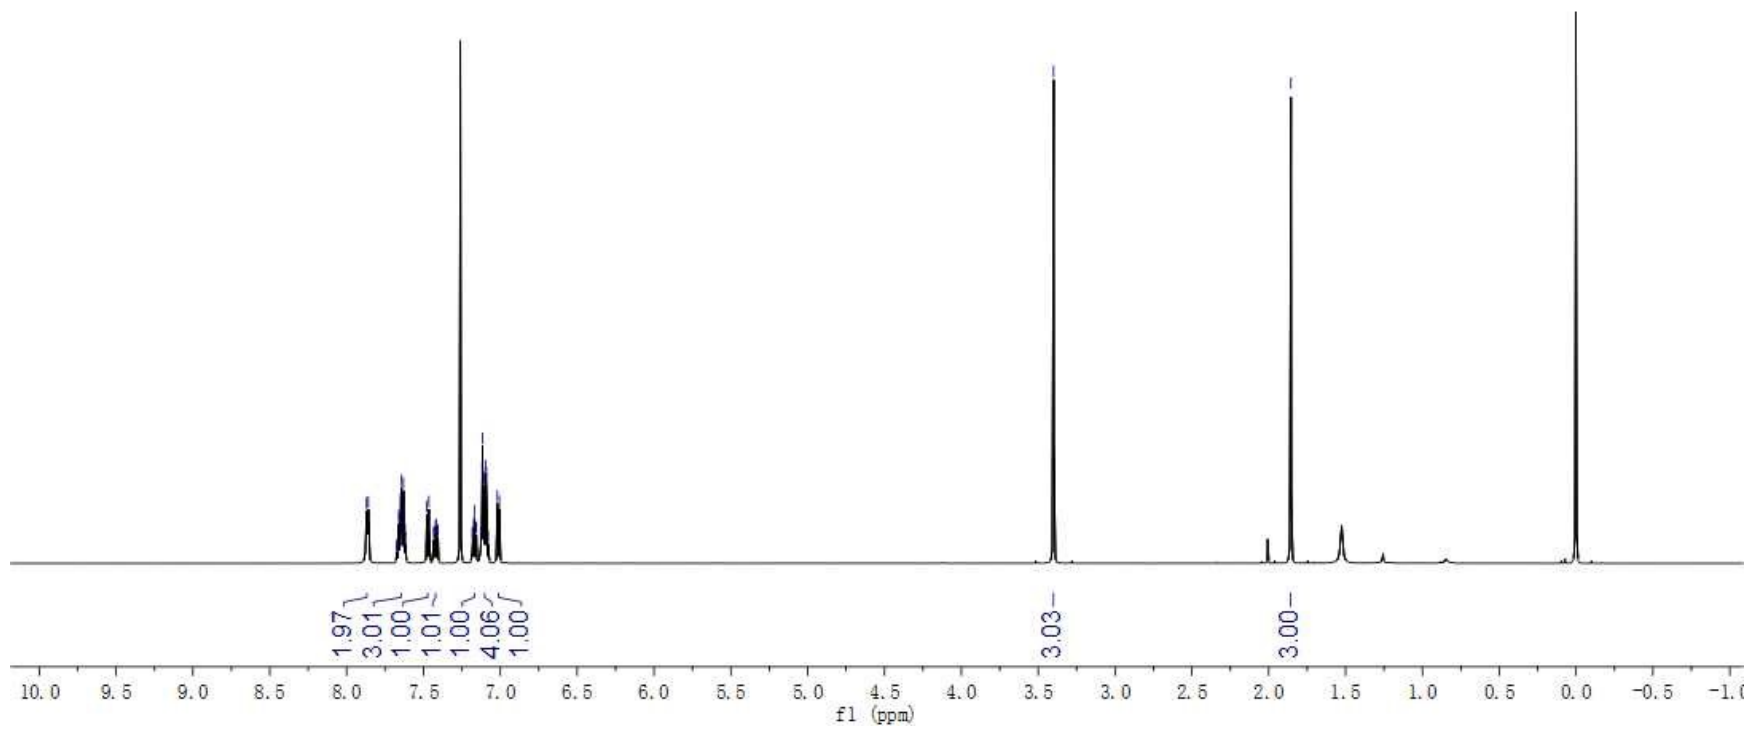

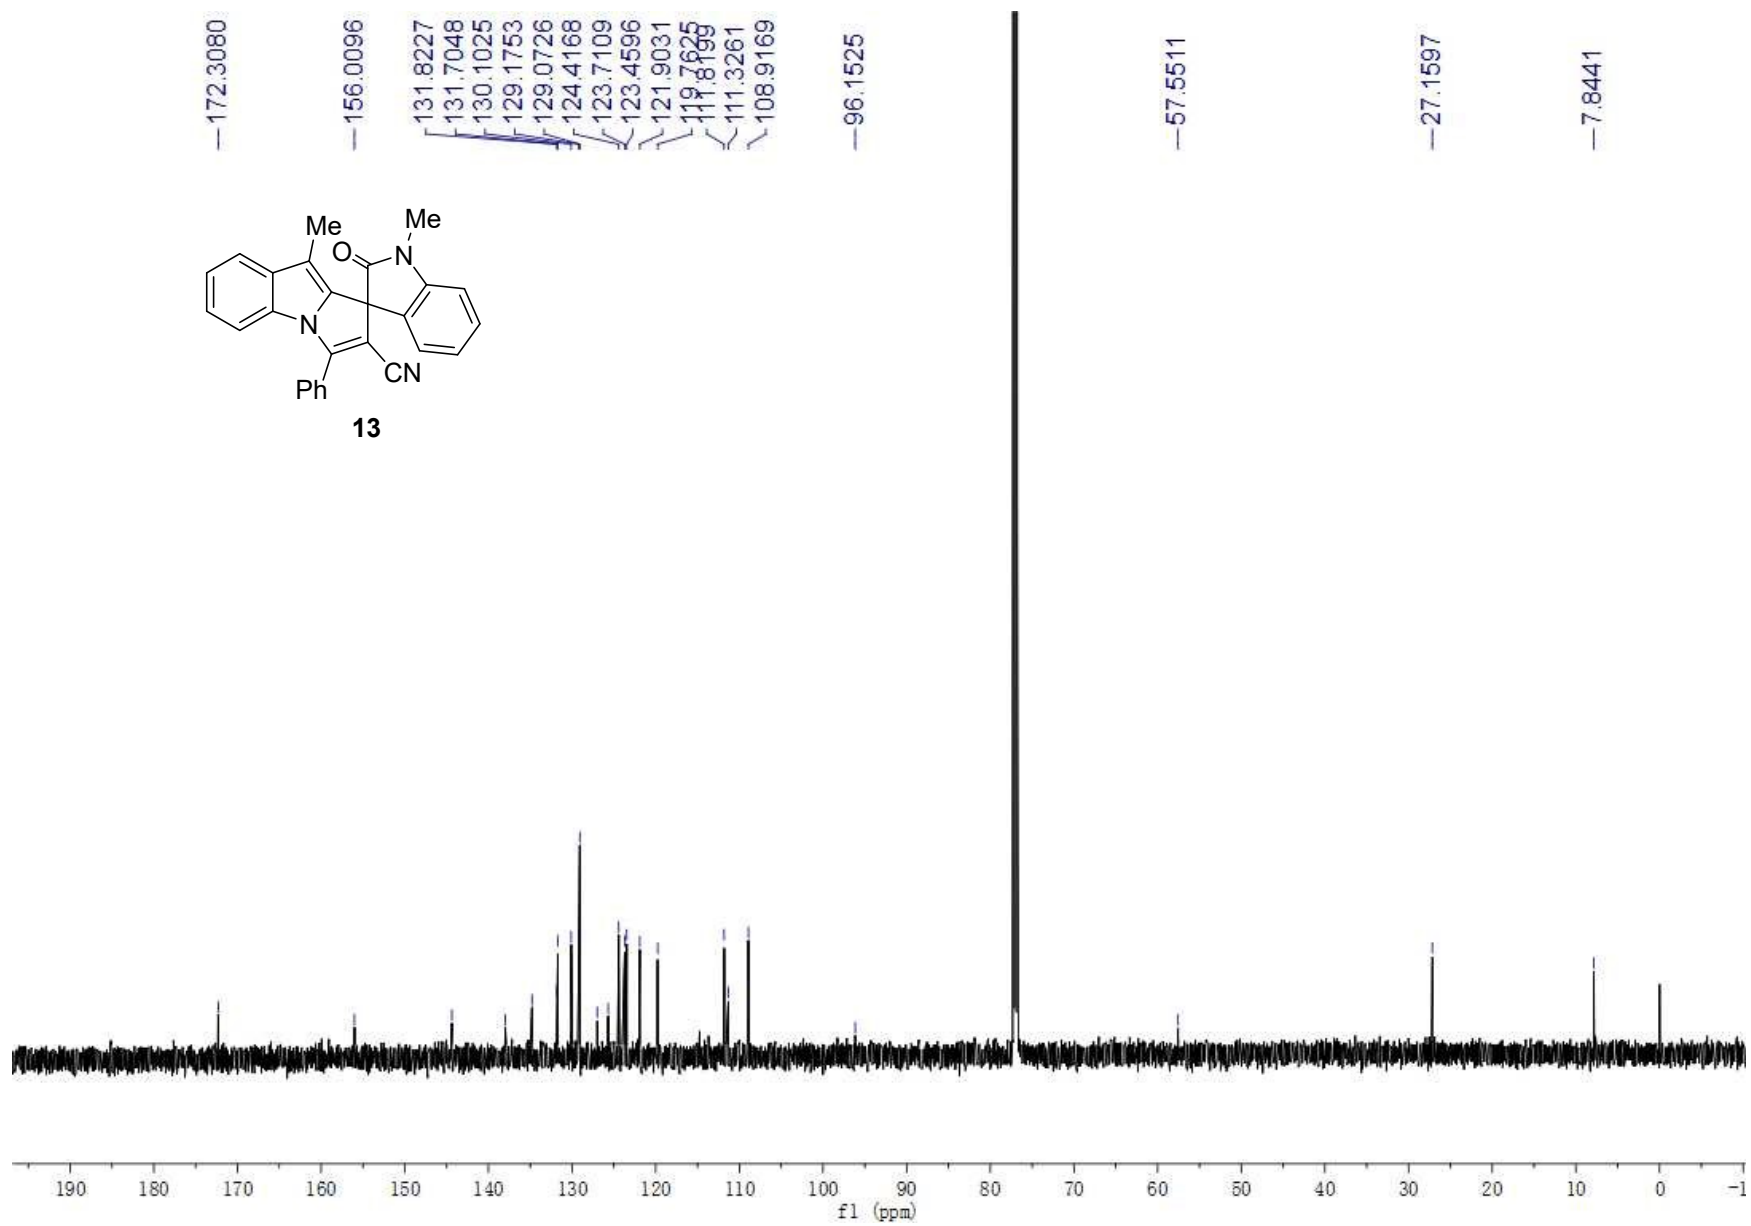

Supplement: d2ob01580c1.pdf [file d2ob01580c1.pdf]
